# Supplementary material for: Plasma acylcarnitine levels increase with healthy aging
Source: Aging (Albany NY). 2020 Jun 16;12(13):13555–70. doi: 10.18632/aging.103462 (PMC7377890; doi:10.18632/aging.103462)
Supplement: Supplementary Table 1 [file aging-12-103462-s003..xlsx]

## Sheet: Supplementary Table 1
Supplementary Table 1. Age-associations of metabolites from C18 column. Mass spectral features are reported by mass-to-charge ratio (m/z) and retention time (RT). Significance of association is indicated by -Log(p), and strength and direction of association are indicated by Spearman's rho. Features listed before "FDR 0.2 threshold" passed FDR correction.
m/z	RT	-Log(p)	Spearman's rho
547.173	268.1	10.3737	-0.487256
489.171	267.9	9.00349	-0.455586
289.234	268.7	8.88273	-0.452647
530.197	266	8.32331	-0.438584
448.146	278.3	7.83565	-0.425746
480.161	266.9	7.70333	-0.422192
505.144	268.5	7.52433	-0.417344
490.174	266.2	6.92082	-0.400216
253.194	265.1	6.85078	-0.398185
504.146	270.6	6.52724	-0.388567
531.2	269.4	6.17198	-0.3776
272.208	265.6	5.8962	-0.368785
754.361	266.1	5.79588	-0.365565
481.165	268.9	5.77728	-0.364984
413.135	266.9	5.7167	-0.362963
508.141	268.1	5.7167	-0.362962
741.368	307.9	5.50031	-0.355729
1594.55	270	5.37161	0.351343
293.187	277.1	5.3536	-0.350723
283.24	290	5.29499	-0.34872
546.168	263.2	5.22768	-0.346378
603.401	267.5	5.21112	-0.345802
199.147	505.5	5.14206	0.343377
506.147	268.2	5.13194	-0.343027
491.187	302.1	5.11805	-0.342535
587.828	53.2	5.03716	-0.339655
407.114	266.4	5.02319	-0.339159
211.147	286.7	4.93181	-0.335865
181.558	247.8	4.88941	0.334291
105.11	42.5	4.79317	0.330856
465.121	268.1	4.68403	-0.326792
454.387	469.6	4.63451	0.324877
278.627	371.2	4.53313	-0.321088
287.631	375	4.42366	-0.316886
213.163	505.5	4.4045	0.316114
524.149	265.2	4.36251	-0.314507
160.543	246.2	4.27327	0.310982
117.073	85.5	4.25885	-0.310422
535.191	290.7	4.19246	-0.307787
341.03	247.7	4.18977	0.307691
555.854	49.5	4.098	-0.304
1894.71	82.2	4.0752	0.303059
532.214	308.8	4.07109	-0.302907
269.225	505.7	4.05849	0.30238
270.229	505.7	4.0348	0.301428
320.079	244.5	4.01323	0.300544
925.728	540.5	4.00393	0.300155
276.089	244.7	3.96051	0.298367
512.762	370.1	3.93375	-0.297259
434.269	536.2	3.89432	0.295618
467.318	197.4	3.84484	-0.293545
282.622	359.6	3.80452	0.291844
508.162	298	3.79527	-0.291453
281.225	142.8	3.77829	-0.290732
355.261	317.1	3.7762	-0.290643
246.009	88.8	3.74279	0.289219
301.063	76	3.73527	0.288898
548.185	301.3	3.73071	-0.288702
153.033	481.2	3.71484	-0.288022
517.12	265.2	3.67432	-0.286277
508.28	360.4	3.66611	0.285922
464.116	262.6	3.64256	-0.284901
385.272	357.8	3.63081	0.284391
297.626	343.2	3.61714	0.283795
418.278	316.3	3.60631	-0.283323
452.371	391.3	3.5926	0.282723
449.148	264.9	3.58899	-0.282565
590.378	433.6	3.58847	0.282542
998.335	475.3	3.57773	0.282071
456.402	464.9	3.57716	0.282046
978.776	480	3.56607	-0.281559
182.088	243.3	3.54884	0.2808
641.913	463.8	3.54197	0.280497
501.278	342.2	3.5338	0.280136
296.145	399.1	3.52393	-0.2797
326.267	331.4	3.49578	0.27845
189.042	244.4	3.49347	0.278347
1567.14	483.5	3.4834	0.277899
655.411	405.8	3.468	-0.277211
548.363	49.1	3.449	-0.276361
312.215	92.7	3.4283	0.275431
1052.8	498.1	3.4185	0.27499
374.288	318.2	3.41283	0.274734
153.054	287.9	3.40536	0.274397
420.278	443.3	3.39745	-0.27404
271.164	70.1	3.38929	0.27367
1291.92	444.9	3.36944	0.272769
333.333	368.3	3.36888	0.272744
466.314	176.5	3.331	-0.271016
1565.55	411.6	3.3297	0.270957
203.106	253.1	3.31635	0.270345
290.268	271.9	3.28518	-0.268911
568.79	434.4	3.27592	-0.268484
125.07	88.3	3.23866	0.266757
143.085	505.5	3.22596	0.266165
284.244	286.6	3.2124	-0.265532
1076.76	477.9	3.20565	-0.265217
417.334	451	3.20468	0.265171
1243.34	39	3.20467	0.265171
223.095	255.6	3.20031	0.264967
1432.86	359.6	3.1911	0.264535
239.09	63.8	3.17983	0.264006
1075.17	471.7	3.17282	0.263676
1027.57	361.1	3.17094	0.263588
418.338	429.9	3.15262	0.262724
339.252	347.3	3.12829	0.261572
592.387	452.5	3.11814	0.26109
373.272	319.7	3.0941	-0.259944
277.156	420	3.09078	0.259786
295.004	80.4	3.03373	0.257045
454.314	538.7	3.02964	0.256848
309.007	44.9	3.02769	-0.256753
415.195	316.5	3.02634	0.256688
92.5028	396.6	3.02565	-0.256655
896.694	540.2	3.02396	0.256573
779.541	453.4	3.01874	0.25632
399.327	312.9	3.01763	0.256267
104.106	44.7	3.015	0.256139
271.204	264.8	3.01126	-0.255958
409.752	350.2	3.00151	0.255485
1087.37	301.6	2.98984	0.254917
1236.14	473.8	2.97631	0.254257
291.128	368.6	2.96722	-0.253813
287.231	505.4	2.96045	0.253482
414.139	266.8	2.93934	-0.252445
728.395	581.4	2.9368	0.25232
504.189	359.7	2.93192	0.25208
503.185	359.7	2.91323	0.251158
531.218	310.1	2.9125	0.251122
188.086	271.6	2.90967	-0.250982
519.157	360.1	2.90632	0.250816
450.298	486.1	2.89674	0.250342
523.295	394.4	2.89569	-0.25029
560.244	284.3	2.89172	-0.250093
450.16	300.5	2.88908	-0.249962
244.637	299	2.87638	-0.24933
423.08	273.8	2.87059	-0.249042
1531.67	32.8	2.86591	0.248808
285.068	242.3	2.86404	0.248715
332.579	379.1	2.86298	-0.248662
FDR 0.2 threshold
310.023	91.5	2.85724	0.248376
278.149	279.6	2.84802	0.247914
473.034	91.7	2.84521	0.247773
342.17	127.6	2.84222	0.247624
631.397	571.1	2.84208	-0.247616
526.29	362.9	2.83682	0.247353
371.184	309.8	2.83218	-0.24712
307.15	515.3	2.83162	-0.247092
503.304	68.9	2.80379	-0.24569
719.836	37.9	2.79954	-0.245475
658.425	375.1	2.79505	-0.245248
559.292	252.8	2.78966	0.244975
499.143	352.2	2.78212	0.244593
1004.58	361.6	2.77631	0.244298
189.163	504.8	2.77302	0.244131
1511.75	274.3	2.77177	0.244067
444.366	347.6	2.76857	0.243904
168.065	70.7	2.76509	0.243727
181.085	259.9	2.75873	0.243403
1284.66	494.7	2.75548	0.243237
467.15	242.8	2.75357	0.24314
1220.31	488.7	2.73865	0.242377
358.294	330.3	2.7297	0.241919
527.294	361.4	2.72233	0.24154
159.032	244.7	2.71811	0.241324
1003.58	362.1	2.71721	0.241277
716.523	434.5	2.71618	-0.241224
990.779	38.1	2.71083	-0.240949
286.228	505.5	2.71017	0.240915
283.629	260.9	2.70083	0.240434
1198.75	372.9	2.68359	-0.239542
610.234	370.2	2.6797	-0.239341
1070.72	587.9	2.67571	0.239134
1137.68	366	2.67306	0.238996
415.151	301.9	2.6698	-0.238827
482.418	491.3	2.65858	0.238244
1331.94	568.4	2.65765	0.238195
301.253	319.2	2.65096	-0.237846
171.137	353.7	2.64719	-0.23765
138.548	245.7	2.63914	0.237229
148.041	61.1	2.63535	-0.237032
555.454	507.1	2.63449	0.236986
257.149	74.9	2.63444	0.236984
1306.93	581.1	2.63002	0.236752
382.257	143.2	2.62834	0.236664
254.197	264.8	2.62785	-0.236639
105.069	299.2	2.62126	-0.236293
310.2	75.9	2.62114	0.236287
773.584	410.2	2.59573	-0.23495
431.241	242.5	2.59051	-0.234674
528.314	273.7	2.5886	-0.234573
472.339	334.8	2.58544	0.234406
311.203	75.7	2.58274	0.234263
547.331	70.1	2.58146	-0.234196
398.325	334.1	2.57949	0.234091
89.0077	372.7	2.57726	-0.233973
533.216	307.8	2.57649	-0.233933
339.266	323.8	2.57584	-0.233898
236.236	284.2	2.56865	0.233516
846.422	541.1	2.55885	-0.232996
218.137	257.7	2.55409	0.232743
685.922	442.7	2.55372	0.232723
1052.58	360.4	2.55243	0.232654
556.454	518.2	2.54812	0.232425
780.649	43.9	2.54744	-0.232389
299.633	368.6	2.54693	-0.232361
686.196	183.6	2.54565	0.232293
1490.86	32.8	2.54445	-0.232229
1366.54	277	2.54178	0.232086
409.147	246	2.53431	0.231687
241.142	464.7	2.52285	-0.231074
801.998	409.4	2.51604	0.230708
280.653	408.7	2.50624	0.230182
160.115	539.3	2.4962	-0.229641
1202.82	479.7	2.49287	0.229461
199.927	51.1	2.4924	-0.229435
358.284	307.2	2.49193	-0.22941
359.297	302.8	2.49014	0.229313
352.164	52	2.48785	0.22919
931.11	588.7	2.48531	0.229052
524.31	343.6	2.47933	0.228729
204.084	47.5	2.47293	-0.228382
795.519	510.2	2.46762	0.228094
666.461	543.7	2.46756	-0.228091
159.091	47.5	2.46639	-0.228028
1370.75	478.9	2.46604	-0.228009
493.362	297.1	2.45965	-0.227661
551.83	593.5	2.45892	0.227622
574.255	373.8	2.45812	-0.227578
772.439	328.5	2.45532	-0.227425
277.601	338.8	2.45114	0.227198
484.288	259.3	2.44385	-0.2268
228.231	547.5	2.44132	-0.226663
1604.31	29.3	2.43112	0.226105
385.166	480.6	2.42404	0.225717
630.789	40.1	2.41483	-0.225212
131.961	543	2.41131	-0.225018
559.798	369.2	2.40945	-0.224916
524.36	411.4	2.40422	0.224628
341.037	94.2	2.40228	0.224521
500.274	337	2.40113	0.224457
428.161	246.3	2.39846	0.22431
550.76	398.8	2.39577	-0.224162
1408.92	273.2	2.39504	0.224122
871.449	526.4	2.39412	0.224071
340.27	313.5	2.39122	-0.223911
215.179	506.2	2.3893	0.223805
1083.63	344	2.38587	0.223615
808.525	102.5	2.38144	-0.22337
1038.89	496.1	2.37617	0.223078
138.054	45.7	2.37153	0.222821
166.158	374.7	2.36959	-0.222713
291.139	343.8	2.36906	0.222684
477.169	338.9	2.36631	0.222531
443.354	326.7	2.36473	0.222443
504.341	410.2	2.36304	0.222349
680.717	44.3	2.36299	-0.222347
211.143	79.2	2.35854	0.222099
242.925	39.2	2.35554	-0.221932
342.337	514.4	2.35425	-0.22186
566.25	258.9	2.35331	0.221807
119.068	47	2.35261	-0.221769
328.284	479.6	2.3524	0.221757
144.101	48.2	2.35199	0.221734
748.389	46.7	2.34718	-0.221466
374.274	300.1	2.34065	-0.221101
140.951	378.8	2.33872	-0.220993
522.257	341.6	2.33798	0.220952
1341.39	30.7	2.33746	-0.220922
292.062	244.8	2.33246	0.220643
183.114	523.5	2.33033	0.220523
1334.96	565.2	2.32941	0.220472
559.295	369.4	2.32696	-0.220334
217.134	530	2.32683	-0.220327
667.436	495.3	2.32659	0.220314
198.185	541.9	2.32526	0.220239
176.143	562.9	2.32484	0.220215
195.993	380.2	2.32272	-0.220097
360.3	298.7	2.32044	0.219969
784.092	487.7	2.31338	-0.219572
272.166	82.1	2.31331	0.219568
1322.32	372.3	2.30889	0.219319
572.329	331.3	2.30627	0.219171
469.801	590.6	2.30256	0.218962
462.816	103.7	2.30184	-0.218921
680.44	50	2.29768	-0.218687
541.828	409.5	2.29765	0.218685
585.286	46.2	2.29307	-0.218426
1200.26	412	2.28892	0.218192
333.241	289	2.2865	-0.218055
175.956	512	2.28242	-0.217824
302.231	300.7	2.27549	-0.21743
507.048	47.1	2.27319	-0.2173
494.299	77.6	2.27134	-0.217195
429.263	76.9	2.26868	-0.217044
170.98	398.7	2.26204	-0.216665
120.065	65.3	2.25598	-0.21632
495.219	178.7	2.25427	0.216222
654.806	427.6	2.25149	-0.216064
117.073	506.1	2.25125	0.21605
1582.45	282.6	2.24974	-0.215964
644.491	577.5	2.24753	-0.215837
291.271	271.6	2.24672	-0.215791
451.25	53	2.24474	-0.215678
603.383	566	2.24392	0.215631
706.63	44.1	2.24028	0.215423
1264.74	36.3	2.23785	-0.215283
249.009	97.4	2.23511	0.215126
1522.91	361.9	2.23436	0.215083
705.357	480.1	2.23299	-0.215005
1590.4	271.9	2.23088	0.214884
786.379	45.2	2.22621	-0.214615
608.416	429	2.22488	0.214539
552.831	592.7	2.22183	0.214364
1321.39	423.7	2.21941	0.214224
1331.33	409.7	2.21789	0.214137
1458.17	32.2	2.21343	0.21388
383.114	46.8	2.21173	0.213782
405.257	81.4	2.21024	-0.213696
1051.58	360.5	2.2093	0.213642
326.213	266.8	2.20876	0.213611
788.956	360.5	2.20617	-0.213461
849.754	536	2.20503	0.213396
252.049	478.2	2.20133	0.213181
340.237	312.4	2.20123	0.213176
757.936	354	2.19738	-0.212953
947.259	40.4	2.19475	0.212801
707.45	374.5	2.19456	-0.21279
839.634	515.2	2.19358	0.212733
545.357	111	2.19168	-0.212623
561.109	444.3	2.18637	-0.212315
129.069	506.5	2.18497	0.212234
810.026	456.6	2.18456	0.21221
549.188	301.8	2.18046	-0.211972
300.622	343.9	2.18002	0.211946
779.447	356.9	2.17899	-0.211886
441.295	531.2	2.17723	0.211784
1250.83	394.2	2.17571	0.211695
1149.74	395	2.17231	-0.211497
121.088	536.5	2.17212	0.211486
311.069	250.8	2.17206	0.211483
352.223	284.1	2.1711	0.211427
259.038	62.2	2.1691	0.211311
150.057	50.7	2.1682	-0.211258
1025.01	517.1	2.16743	0.211213
735.51	468.2	2.16675	0.211174
918.623	42.2	2.16306	0.210958
1005.71	36.7	2.1621	-0.210902
604.269	480.2	2.1621	-0.210902
730.49	94.1	2.15934	-0.210741
428.263	317.2	2.15746	-0.210631
930.831	503.2	2.14953	0.210167
282.182	273.6	2.14922	-0.210149
404.24	51.8	2.14816	-0.210087
1005.58	361.6	2.14278	0.209771
321.257	335.6	2.14187	-0.209718
96.514	402	2.14152	-0.209697
90.5063	398.2	2.1412	-0.209678
1299.88	397.3	2.13793	0.209486
1070.77	40.6	2.13673	-0.209416
465.316	559.5	2.13435	0.209276
365.318	311.2	2.13397	0.209254
248.167	88.4	2.13378	0.209242
138.292	259.9	2.12774	-0.208887
201.163	505.5	2.12142	0.208514
1160.74	450.2	2.11948	0.2084
959.578	438.5	2.11535	0.208156
1224.27	285	2.11316	-0.208026
390.262	283.7	2.11278	0.208004
418.293	302.8	2.11254	0.20799
784.582	11.5	2.11226	0.207973
115.054	50	2.11203	-0.207959
296.207	207.7	2.11122	0.207911
1579.19	277.6	2.11111	-0.207905
1183.82	485.6	2.10923	0.207794
1119.78	443.6	2.10872	-0.207763
357.15	465.1	2.10564	0.207581
174.238	272.1	2.10481	0.207532
89.9878	501.2	2.10477	0.207529
395.001	60.1	2.10333	-0.207444
623.258	365.6	2.10277	0.207411
677.453	507.8	2.10083	0.207296
268.949	23	2.10081	-0.207295
267.041	89.2	2.09949	-0.207217
193.085	63.1	2.09463	0.206928
334.587	424.4	2.09454	-0.206923
992.786	38.1	2.09204	-0.206774
797.315	405.6	2.09198	-0.206771
1160.81	494.2	2.08615	0.206424
545.822	428.4	2.08487	-0.206347
1029.62	394.2	2.08476	0.206341
1043.7	414.1	2.08418	0.206306
924.726	525.1	2.0834	0.20626
153.01	402.1	2.08135	-0.206138
1419.8	279.2	2.0781	-0.205944
950.623	383.2	2.07754	0.20591
450.295	336.4	2.07713	0.205886
523.354	412.1	2.07662	0.205855
1459.86	275.7	2.07611	0.205825
365.208	74.8	2.07582	0.205808
1332.84	410	2.0754	0.205782
1187.76	409.7	2.07509	0.205764
304.234	511.1	2.07465	0.205738
1738.98	297.6	2.07424	-0.205714
289.639	411.8	2.0735	0.205669
590.318	365.9	2.07348	0.205668
326.304	491.1	2.07219	0.205591
288.132	371.2	2.07128	-0.205537
207.064	128.8	2.0683	0.205358
352.098	255.8	2.0677	0.205323
727.497	302.1	2.06579	-0.205208
398.252	529.1	2.06549	0.20519
650.393	106.5	2.06373	-0.205085
269.189	110.7	2.06353	-0.205072
464.125	461.7	2.06144	0.204947
1507.66	278	2.06003	-0.204863
967.574	338.4	2.05839	0.204765
1342.61	34.8	2.05509	-0.204566
1222.61	559.5	2.05274	0.204426
157.076	48.3	2.05274	-0.204425
717.361	552.3	2.05176	-0.204367
947.524	508.8	2.04813	-0.204148
1530.61	29.6	2.04497	-0.203959
313.102	325.3	2.04322	0.203853
90.0278	221.9	2.04107	-0.203723
254.247	455.7	2.03817	-0.203549
113.107	574.9	2.03421	0.203309
169.976	393.6	2.03414	-0.203305
656.908	47.2	2.03245	-0.203203
1217.74	38.3	2.03035	-0.203076
910.373	446.8	2.02622	-0.202827
663.279	413.1	2.02556	0.202787
1210.71	37	2.02432	-0.202712
1566.63	38.7	2.02424	-0.202707
775.299	457.8	2.02417	-0.202703
350.014	63.1	2.02115	-0.20252
206.1	44.9	2.0184	-0.202353
164.029	49	2.01836	-0.202351
1535.03	271.8	2.01809	0.202334
673.92	443.7	2.01503	0.202149
303.645	364.7	2.01332	0.202045
1714.1	266.4	2.01179	-0.201952
1089.75	38.4	2.01174	-0.201949
1485.1	29.4	2.01026	0.201859
1762.62	393.4	2.01003	0.201845
1556.35	277.1	2.00969	-0.201825
1019.6	360.9	2.00927	0.201799
448.759	442.2	2.00879	-0.20177
242.109	246.1	2.00448	0.201508
89.5062	12.7	2.00332	-0.201437
1212.85	382	2.00298	-0.201416
1551.66	38	2.00158	-0.201331
340.176	49.2	1.99812	-0.201121
258.228	182	1.99802	-0.201114
290.121	344.1	1.99685	0.201043
541.366	305.8	1.99665	0.20103
166.052	46.4	1.99629	-0.201009
1373.43	271	1.99611	0.200998
1419.07	275.8	1.99525	-0.200946
723.069	331.7	1.9946	-0.200906
896.988	451	1.99406	-0.200873
1043.13	400.7	1.9935	0.200839
1028.58	361.1	1.99311	0.200815
383.165	494	1.98893	0.20056
396.309	313.2	1.98863	0.200541
557.281	343.5	1.98786	0.200494
139.987	396.9	1.98666	-0.200421
535.816	52.7	1.986	-0.200381
570.799	367.4	1.98493	0.200315
1011.14	394.8	1.98466	0.200298
263.088	246.2	1.98194	0.200132
149.93	564.7	1.98001	0.200013
1263.89	457.4	1.97791	0.199885
1303.9	389	1.97736	0.199852
116.891	462.1	1.97539	-0.199731
206.08	79.7	1.9748	0.199695
1326.63	34.4	1.97377	-0.199631
571.448	506.1	1.97377	0.199631
362.202	124.6	1.97361	-0.199621
231.971	36	1.97345	0.199612
299.236	258.8	1.97149	-0.199491
334.183	528.6	1.9713	-0.19948
1243.84	478.7	1.97007	0.199404
427.322	290.3	1.96933	-0.199359
477.821	529.4	1.96885	-0.199329
118.06	49.6	1.96793	-0.199272
1139.72	40.6	1.9658	-0.199142
1219.45	287.7	1.96575	-0.199138
275.632	403.9	1.965	-0.199093
552.273	501.5	1.96499	-0.199091
1275.88	403.6	1.95912	0.198731
290.627	368.2	1.95854	-0.198694
857.002	400	1.95645	-0.198566
779.369	472.7	1.95608	-0.198543
914.575	105.1	1.95447	-0.198444
611.376	233.3	1.95166	0.19827
90.976	39	1.94828	-0.198062
358.221	301.9	1.94787	-0.198036
1114.72	39.3	1.94759	-0.198019
384.169	478.7	1.9462	0.197933
596.24	344	1.94343	0.197761
422.783	90.6	1.94338	-0.197758
832.786	519.8	1.9428	0.197722
304.174	256.6	1.94128	-0.197628
638.915	405.6	1.9398	-0.197537
233.153	488.9	1.93901	0.197488
275.643	260.9	1.93442	0.197204
598.255	368.5	1.93391	-0.197172
856.585	436.5	1.93381	0.197166
188.034	51.1	1.93352	-0.197148
1265.5	285	1.93246	-0.197082
326.377	385.4	1.93244	0.19708
677.404	375.3	1.92761	0.196781
1736.16	393.4	1.92578	0.196667
114.127	212.4	1.92544	-0.196646
782.481	102.5	1.92526	0.196635
769.592	414.3	1.92261	0.19647
1506.48	270.8	1.92242	0.196458
626.377	55	1.91977	-0.196293
113.963	13.2	1.91924	-0.19626
110.019	399	1.91677	-0.196106
830.57	438.8	1.91635	0.196079
130.714	411.5	1.91473	0.195979
188.07	49.3	1.91369	-0.195914
564.245	359.3	1.91363	0.19591
163.038	111.1	1.91265	0.195849
154.989	13.9	1.91072	-0.195728
1386.53	275.5	1.9104	0.195708
244.923	39.4	1.90994	-0.19568
509.379	480.8	1.90606	0.195437
439.134	262.6	1.9055	-0.195402
1000.64	382.3	1.90438	0.195332
571.808	498	1.90393	-0.195304
1000.62	107.5	1.90325	-0.195262
768.492	49.9	1.9012	-0.195133
486.268	538.2	1.8994	0.19502
711.405	482.1	1.89774	0.194916
366.012	556.9	1.8975	0.194901
332.329	364.8	1.89576	0.194792
209.127	63	1.8953	0.194763
500.348	392.9	1.89434	0.194703
596.284	261.6	1.89386	0.194673
422.324	323.4	1.89374	0.194665
586.213	352.4	1.89275	0.194603
102.066	45.7	1.89191	0.19455
1473.24	29.6	1.89116	-0.194504
91.504	405.9	1.89009	-0.194436
616.184	358.9	1.8898	0.194418
746.566	403.8	1.88914	-0.194377
128.95	12.8	1.88894	-0.194364
867.309	40.4	1.88872	-0.19435
1170.82	491.4	1.8887	0.194349
257.225	353.4	1.88812	-0.194312
1062.67	409.4	1.88679	0.194229
446.323	322.6	1.88431	0.194073
514.782	44.8	1.88178	0.193913
400.304	544	1.88175	-0.193912
454.786	513	1.88147	0.193894
1245.71	37.8	1.88139	-0.193889
300.133	368.6	1.87988	-0.193794
1291.94	30.4	1.87831	0.193695
1634.61	34.8	1.87436	-0.193446
803.91	56.4	1.87311	0.193367
177.148	278.9	1.87296	0.193358
942.562	440.6	1.86828	-0.193062
548.826	39	1.86695	-0.192978
1007.76	42.8	1.86621	-0.192931
361.199	123.6	1.86581	-0.192906
240.094	61.2	1.86548	0.192885
728.647	43.9	1.86542	-0.192881
322.997	92.2	1.86453	0.192825
1214.7	259.1	1.86428	-0.192809
1618.17	483.5	1.864	0.192791
213.203	330.1	1.86257	-0.192701
1050.66	369.3	1.85902	0.192476
1500.04	271.5	1.85767	0.19239
429.374	394.7	1.85698	0.192346
347.314	535.6	1.85549	0.192252
1179.09	484.3	1.85536	0.192244
798.712	43.7	1.8545	0.192189
765.987	395.1	1.85386	0.192149
171.98	12.6	1.85277	-0.192079
358.294	556.8	1.85243	0.192058
312.028	390.9	1.85184	-0.19202
654.913	401.8	1.85144	-0.191995
452.78	19.7	1.8511	0.191973
543.813	423.1	1.85064	0.191944
1140.23	38.8	1.84994	-0.1919
372.288	438.6	1.84927	0.191857
410.915	37.2	1.84732	0.191733
337.594	376.2	1.84588	-0.191642
949.621	383.3	1.8444	0.191547
1409.91	426.1	1.84412	-0.19153
1264.65	477.9	1.84244	0.191423
1493.09	32	1.84209	0.1914
374.252	311.1	1.84174	-0.191378
266.12	55.1	1.84145	0.19136
174.558	318.6	1.84121	0.191344
946.692	359.3	1.84054	0.191302
171.992	12.4	1.8401	-0.191274
1159.46	296	1.83957	-0.19124
171.062	74.8	1.83907	-0.191208
1233.71	40.7	1.83861	-0.191179
515.809	396.3	1.83839	0.191165
123.041	240.7	1.83839	0.191165
241.073	572.7	1.83827	0.191157
284.131	261.2	1.83635	0.191034
1234.42	287.2	1.83338	0.190845
412.283	210.9	1.83332	-0.190841
361.276	207.3	1.8333	0.19084
773.662	46.2	1.83135	-0.190715
1320.88	429.3	1.8297	-0.19061
1006.59	361.5	1.82956	0.190601
427.158	246.5	1.82952	0.190599
1459.33	31.5	1.82847	-0.190532
597.341	544.2	1.8284	-0.190527
328.661	391.5	1.82818	-0.190513
502.356	76	1.82615	-0.190383
233.968	19.9	1.82519	0.190321
1072.66	410	1.8251	0.190316
458.786	83.8	1.82409	-0.190251
542.403	500	1.82376	0.19023
1069.14	388.9	1.82134	0.190075
569.34	369.3	1.82036	0.190012
820.55	41.8	1.81954	-0.18996
376.252	444.9	1.81574	-0.189716
151.147	306.1	1.81557	-0.189705
105.103	43.2	1.81477	-0.189653
189.009	92.4	1.81424	0.189619
141.489	46.3	1.81128	-0.189429
465.343	275.4	1.81122	0.189425
709.945	59.2	1.81095	-0.189408
596.261	399.3	1.80947	-0.189313
269.615	338.7	1.80858	0.189256
953.397	447.5	1.80603	-0.189092
172.096	528.8	1.80453	0.188995
430.377	469.3	1.80431	0.188981
174.848	43.8	1.80348	-0.188927
208.054	97.6	1.80198	0.188831
734.806	38.6	1.80179	-0.188819
757.483	352.1	1.79994	-0.1887
545.277	436.3	1.79962	-0.188679
1405.88	279	1.7994	-0.188665
752.556	418.9	1.7979	0.188568
431.296	210.2	1.79751	-0.188543
1168.76	452.8	1.79617	0.188456
1124.45	39.2	1.79553	-0.188415
209.027	518.3	1.79529	-0.188399
332.205	526.5	1.79441	0.188343
505.231	348.5	1.79366	0.188294
1468.05	273.5	1.79364	0.188293
405.237	467.7	1.79186	0.188178
1018.52	377.3	1.78725	-0.18788
503.331	559.6	1.78636	0.187822
703.573	400	1.78591	-0.187793
283.115	529.4	1.78501	0.187735
589.234	415.1	1.78467	-0.187713
386.216	543.8	1.78456	0.187705
198.097	62.4	1.78452	-0.187703
526.261	309	1.78419	0.187682
974.624	375.7	1.78301	0.187605
434.293	561.3	1.78069	0.187455
255.25	462.4	1.77982	-0.187399
1319.33	409.3	1.77957	0.187382
840.434	553.7	1.77826	0.187297
556.822	46.3	1.77768	-0.187259
692.425	405.5	1.77576	0.187135
90.9891	563.2	1.77528	0.187103
313.647	413.2	1.77283	-0.186945
142.508	84.2	1.7728	0.186942
606.284	563.3	1.77116	0.186835
728.83	41.1	1.76912	-0.186703
796.856	550.6	1.76886	-0.186686
185.135	315.5	1.76818	-0.186642
606.396	92.7	1.76798	-0.186629
712.392	69.1	1.76797	0.186628
339.602	418.3	1.76786	-0.186621
911.708	524.3	1.76723	0.18658
217.24	411.4	1.76715	0.186575
723.491	80.8	1.76704	-0.186568
803.003	412.5	1.76679	0.186551
1181.79	458.4	1.76582	0.186488
1315.14	271.8	1.76571	-0.186481
1649.04	273.3	1.7652	-0.186448
482.345	326.7	1.76494	0.186431
544.367	89.4	1.76404	-0.186372
1044.7	410.6	1.76132	0.186195
861.141	549.4	1.76014	0.186118
1005.68	428.3	1.75992	0.186103
430.912	38.8	1.75955	-0.18608
290.608	360.2	1.75783	0.185967
336.051	243.7	1.75618	0.18586
1011.78	511	1.75406	-0.185721
147.93	571.3	1.75369	0.185697
399.333	317.3	1.75329	0.18567
1081.33	492.6	1.74783	-0.185313
1734.66	393.3	1.7475	0.185292
226.108	454.1	1.74661	-0.185233
312.781	42.6	1.74603	-0.185195
1038.18	43.3	1.74531	-0.185148
287.203	59.1	1.74441	0.185089
518.351	72.8	1.74439	-0.185087
838.761	40.4	1.74428	-0.18508
1480.86	361.8	1.74421	0.185076
1018.5	481.2	1.74054	-0.184835
819.773	41.9	1.7398	-0.184786
1053.65	344	1.73882	0.184723
748.706	41.1	1.73795	0.184665
273.676	102.9	1.73754	-0.184638
457.231	357	1.73745	0.184632
887.632	551	1.73709	0.184608
1574.15	31.3	1.73583	0.184526
243.134	515.2	1.73539	-0.184497
280.234	426.6	1.73532	-0.184492
712.665	44.3	1.73473	0.184454
802.796	38.2	1.73341	-0.184366
154.989	391	1.73292	-0.184334
1501.37	276.4	1.73175	-0.184257
288.231	264.1	1.73122	-0.184223
1283.85	360.5	1.73095	0.184204
1517.42	274.7	1.73092	0.184203
1070.2	502.5	1.72939	-0.184102
1053.02	579.8	1.72805	-0.184014
742.571	409.4	1.72779	-0.183996
497.233	47.9	1.72772	-0.183992
995.522	415.8	1.72741	-0.183972
1327.99	291.2	1.72718	-0.183956
724.091	296.1	1.72604	0.183881
1448.24	278.2	1.72596	-0.183876
426.706	378.7	1.72556	-0.18385
1289.9	435.7	1.72555	0.183849
360.008	60.9	1.72403	-0.183749
828.363	44.8	1.72279	-0.183667
127.015	115.1	1.72198	0.183613
497.688	394.6	1.71842	0.183378
221.085	333.7	1.71809	-0.183356
481.153	461.1	1.71688	0.183276
1357.96	563.4	1.71625	0.183235
433.328	427.6	1.71624	0.183234
1580.44	290.2	1.71601	-0.183219
169.977	11.8	1.71582	-0.183206
1200.77	414.2	1.71313	0.183028
708.835	495.1	1.71236	-0.182977
332.205	240.3	1.71216	-0.182964
954.282	39.7	1.71134	-0.18291
298.624	343.5	1.71092	0.182882
1089.06	502	1.71003	0.182823
182.057	46.6	1.70965	0.182798
121.071	46.7	1.70953	0.18279
778.535	420	1.70932	0.182776
531.244	365	1.70909	0.182761
889.524	469	1.70458	-0.182462
559.358	566.6	1.70329	0.182376
366.262	274.4	1.70166	0.182268
659.219	572.7	1.70087	0.182215
125.535	244.2	1.70041	-0.182185
1027.16	417.4	1.69933	0.182113
1262.42	280	1.6981	-0.182031
1274.06	272.4	1.69749	0.181991
470.799	594.5	1.69704	0.181961
895.696	535.8	1.6963	0.181911
1135.59	420.4	1.69616	-0.181902
683.685	513.3	1.69614	0.181901
402.092	197.1	1.6956	-0.181865
227.982	14.3	1.69536	-0.181848
963.635	449.8	1.69441	0.181786
259.21	480.9	1.69438	-0.181783
858.782	40.4	1.69333	-0.181713
264.131	489.9	1.6929	-0.181685
490.349	317.9	1.69276	0.181676
948.494	511	1.69269	0.181671
95.0154	60.4	1.69035	0.181515
468.217	298.1	1.68971	-0.181473
366.32	446.4	1.68939	0.181451
427.354	543.5	1.68919	0.181437
921.539	394.2	1.68909	-0.181431
515.916	44.1	1.68905	0.181428
1085.75	472.2	1.68666	0.181269
1512.35	34.7	1.68567	-0.181203
1736.67	393.3	1.68375	0.181074
111.019	397.2	1.68364	-0.181067
603.338	464	1.68302	0.181026
1020.47	480.3	1.6808	0.180878
139.038	293.9	1.67963	0.180799
365.178	273.6	1.67877	0.180742
241.055	77.2	1.67867	-0.180735
1045.71	409.6	1.67792	0.180685
1137.63	588	1.67716	0.180634
315.194	365.7	1.67558	0.180528
420.353	516.6	1.67227	-0.180307
891.924	460.1	1.67216	0.180299
1241.34	275.3	1.67067	0.180199
257.633	352.6	1.67024	0.18017
1457.97	29.6	1.66661	-0.179927
846.86	48.2	1.66475	0.179802
596.152	575.5	1.66404	0.179754
540.363	398.3	1.6638	0.179738
127.966	396.5	1.66232	-0.179638
625.909	407.9	1.6621	-0.179623
494.885	39.9	1.6619	-0.17961
292.11	362.5	1.66072	0.17953
388.216	95.7	1.65857	-0.179386
200.151	505.1	1.65699	0.179279
847.321	39.3	1.65683	-0.179268
1229.73	38.8	1.65673	-0.179262
283.13	337.7	1.65666	0.179257
796.635	40.8	1.65651	-0.179247
477.315	352.6	1.65622	0.179227
331.134	447.9	1.65517	0.179157
1427.49	283.3	1.65487	0.179136
479.331	395.9	1.65472	0.179126
263.124	529.6	1.65398	-0.179077
482.177	308.3	1.65345	-0.179041
155.973	393	1.65244	-0.178973
1363.67	558.4	1.6517	-0.178923
773.991	373.5	1.65138	-0.178901
286.634	372	1.65029	-0.178828
1583.79	280	1.64939	-0.178767
763.477	394.4	1.64877	0.178725
391.223	420.6	1.64844	-0.178702
1213.3	484.1	1.64723	0.178621
713.821	40.8	1.64692	0.1786
258.622	361.6	1.64597	0.178536
1047.71	410.8	1.64552	0.178505
1316.92	448.3	1.64493	0.178465
644.396	276.6	1.64388	-0.178394
1351.7	488.7	1.64237	0.178292
1343.43	278.4	1.64123	0.178215
226.951	39.1	1.64121	-0.178213
1016.64	356.9	1.64117	-0.178211
646.413	234	1.64109	0.178205
342.893	22	1.64058	0.178171
376.191	379.5	1.64045	-0.178162
963.782	38.1	1.63878	-0.178049
369.142	115.2	1.63817	0.178008
449.27	61.6	1.63779	-0.177982
273.605	386.1	1.63749	0.177962
564.892	317.6	1.63608	-0.177866
342.189	532.1	1.63608	-0.177866
475.242	265	1.63599	0.17786
749.434	312.9	1.63529	-0.177812
675.413	93.5	1.63393	-0.17772
819.086	533.4	1.63387	0.177716
730.539	415.7	1.63315	-0.177667
347.144	534.4	1.631	0.177521
182.961	390.2	1.63095	-0.177517
540.088	55.8	1.63019	0.177466
391.251	97.1	1.62982	-0.177441
1563.11	494	1.62889	0.177378
1407.97	29.2	1.62629	-0.177201
898.294	41.6	1.62627	-0.177199
541.427	443.7	1.62599	-0.17718
1132.09	492.9	1.62574	0.177163
199.987	12.4	1.6237	-0.177024
1307.28	278.4	1.62339	0.177003
586.233	424.1	1.62317	-0.176988
1072.16	409.6	1.62188	0.1769
529.751	361.5	1.62163	0.176884
387.178	310	1.62124	-0.176857
1204.83	480.5	1.62056	0.176811
681.832	39.8	1.61985	-0.176762
131.069	524.2	1.61803	-0.176638
192.04	42.4	1.61662	-0.176542
637.386	87	1.61604	-0.176502
310.634	366.1	1.61559	0.176471
1112.56	37.4	1.61538	0.176457
369.744	78.8	1.61502	-0.176433
834.377	514.7	1.61477	-0.176416
890.025	464.1	1.61457	-0.176401
407.35	564.6	1.61424	0.176379
372.839	17.1	1.61405	-0.176366
862.795	37.7	1.61369	-0.176342
444.257	521.9	1.61321	0.176309
596.774	414.8	1.61227	-0.176244
1311.88	465	1.61188	0.176218
400.764	430.2	1.61121	-0.176172
104.297	479.4	1.61117	0.176169
1143.63	495.5	1.61097	0.176156
475.169	322.1	1.61022	0.176104
541.325	408.4	1.60912	0.176029
193.154	44.5	1.60908	0.176026
921.396	514	1.60633	0.175838
173.172	312.2	1.60587	-0.175807
790.385	539.8	1.60513	0.175756
1051.92	494.5	1.60497	0.175745
1214.32	481.3	1.60373	0.17566
157.142	268.1	1.60309	-0.175617
631.831	486.9	1.60298	-0.175609
464.275	531.4	1.60172	-0.175522
141.983	398.1	1.60138	-0.175499
1063.22	512	1.60113	-0.175482
1090.13	379.1	1.59984	0.175393
259.62	410.2	1.59801	0.175268
575.26	370.3	1.59583	-0.175118
318.299	292.5	1.59369	-0.174971
488.818	104.1	1.5934	-0.174951
273.646	379.3	1.59339	0.17495
1272.65	555	1.5932	0.174937
526.328	548.1	1.59298	0.174922
104.016	533.3	1.59292	0.174918
194.138	172.8	1.59187	0.174846
743.29	312.4	1.59121	0.174801
761.755	327.8	1.58931	-0.17467
213.172	61	1.58845	-0.17461
346.837	31.2	1.5866	0.174483
123.055	364.5	1.58637	0.174467
1513.75	29	1.58613	-0.17445
1586.11	504.5	1.58564	0.174417
921.005	536.4	1.58525	-0.17439
706.718	43.9	1.58448	-0.174337
533.281	352	1.58353	0.174271
595.344	312.8	1.58344	-0.174265
498.585	46.5	1.5821	-0.174172
1587.02	409.8	1.58191	0.174159
492.19	301.2	1.58169	-0.174144
677.447	95.4	1.58115	-0.174107
291.119	322.3	1.57981	0.174014
626.32	90.7	1.57739	-0.173847
122.082	546.9	1.57667	0.173797
655.183	276.1	1.57608	0.173756
812.75	41.6	1.57599	-0.17375
283.15	455	1.57581	0.173737
707.952	377.2	1.57496	-0.173679
758.504	486.4	1.57364	0.173588
853.765	42	1.57361	-0.173585
430.746	546.4	1.57318	0.173556
586.448	439.3	1.57265	0.173519
388.304	286.4	1.57213	0.173483
1628.92	412.1	1.57101	-0.173405
353.054	393.5	1.57065	-0.173381
128.95	393.6	1.5696	-0.173307
548.332	414.4	1.56945	0.173297
156.101	532.9	1.56928	0.173285
446.273	568.5	1.56902	0.173267
1003.16	393.9	1.5685	0.173231
288.102	54.4	1.56763	0.173171
406.746	424.8	1.56744	-0.173158
168.08	514.4	1.56729	0.173147
336.966	85.9	1.56583	0.173046
432.762	446.4	1.56496	-0.172986
181.056	244	1.56399	0.172918
111.968	392.6	1.56349	-0.172884
1290.2	563.7	1.56288	0.172841
1128.05	580.4	1.56283	0.172838
550.775	362	1.56133	0.172733
605.4	499.4	1.56105	0.172714
365.34	512.2	1.56085	0.1727
1597.19	483.9	1.55943	0.172601
1564.12	581.2	1.55891	0.172565
446.885	39	1.55787	-0.172493
259.049	38.7	1.55773	0.172483
499.32	322.6	1.55684	0.172421
218.86	34.9	1.55683	0.17242
888.627	42.1	1.55653	-0.172399
331.189	319.5	1.55637	0.172388
1292.91	446.8	1.55425	0.172241
747.511	501.9	1.55401	0.172224
214.167	506	1.55259	0.172125
1506.97	33.4	1.55226	0.172102
743.072	581.9	1.55225	0.172101
1221.05	270.7	1.55147	0.172047
1361.12	273.8	1.55004	0.171947
431.79	586.3	1.54949	0.171909
854.807	37.9	1.54945	-0.171906
638.87	313.6	1.54911	-0.171882
1404.07	37.8	1.5491	0.171882
1114.63	367.4	1.54882	0.171862
573.409	511.9	1.54806	0.171809
279.128	373.2	1.54801	-0.171805
1399.41	280	1.54786	-0.171795
134.073	8.3	1.54676	-0.171719
202.121	246.1	1.54583	0.171654
704.576	400.5	1.54469	-0.171574
1499.91	362.1	1.54314	0.171465
345.982	50.1	1.54217	0.171397
362.189	49.2	1.54216	-0.171397
1260.73	33.2	1.54171	-0.171365
1506.98	394.5	1.5412	0.171329
802.066	576.7	1.54003	-0.171247
1546.01	269.3	1.53952	0.171212
612.165	572.6	1.53802	0.171107
650.249	302.1	1.537	0.171036
653.456	580	1.53664	0.17101
312.632	365.3	1.53579	0.170951
522.178	81.5	1.53325	-0.170773
832.663	564.1	1.5331	0.170762
196.91	75.3	1.53297	-0.170753
1430.72	278.4	1.53289	0.170747
508.373	477.7	1.53079	0.1706
699.403	432.7	1.52996	-0.170542
781.936	485.4	1.52977	-0.170528
1140.85	486.1	1.52912	-0.170483
594.335	320.5	1.52906	-0.170478
569.642	340	1.52906	-0.170478
465.298	526.4	1.52894	-0.17047
523.153	264.1	1.52848	-0.170438
399.261	355.2	1.52813	-0.170413
599.5	481.8	1.52783	-0.170392
1304.24	34	1.52657	0.170303
527.33	464.9	1.5263	-0.170284
384.039	567.6	1.52553	0.17023
1097.92	498	1.52492	0.170187
346.258	528.3	1.52479	-0.170178
861.752	563.8	1.52393	-0.170118
1231.99	277.2	1.5236	-0.170094
844.657	44.8	1.52151	0.169947
564.783	435.6	1.52138	-0.169938
1100.05	281.7	1.52119	-0.169924
801.972	475.3	1.52115	-0.169922
1008.61	361.9	1.52088	0.169903
688.282	580.2	1.52075	0.169893
189.073	45.2	1.52024	-0.169858
440.372	453.6	1.51955	0.169809
154.069	47.9	1.51927	0.169789
593.331	316.7	1.51896	-0.169767
1603.67	31.7	1.51799	-0.169699
229.651	103.4	1.51735	-0.169654
338.231	144.6	1.51647	0.169592
951.626	382.8	1.51641	0.169587
702.559	535.7	1.51623	0.169574
686.503	424	1.51503	-0.16949
621.893	57.1	1.51454	-0.169455
624.344	329	1.51424	0.169434
292.147	368.8	1.51318	-0.169359
1052.6	40.9	1.51314	-0.169356
210.119	322.5	1.51306	0.169351
367.991	536.1	1.51254	0.169314
183.137	367.3	1.51239	0.169304
522.981	295.9	1.51233	0.169299
1397.92	32.7	1.51199	-0.169275
243.928	39	1.5117	-0.169255
106.049	44.4	1.51002	-0.169136
519.326	343.1	1.50945	0.169096
114.965	545.8	1.5086	-0.169035
1096.66	424.3	1.50818	-0.169006
899.475	491.4	1.50811	0.169001
267.209	473.7	1.50753	-0.16896
192.101	67.3	1.50747	0.168955
567.222	337.9	1.50735	0.168947
1098.23	514.2	1.50639	0.168879
610.346	81.2	1.50456	-0.168749
323.181	541.5	1.50433	0.168733
972.764	38.2	1.50428	-0.168729
1418.38	33.3	1.50404	0.168712
1005.21	456.6	1.50384	0.168699
249.06	43.3	1.50368	-0.168687
905.185	314.4	1.50261	-0.168611
382.298	594.3	1.5021	-0.168575
1077.99	275.4	1.50153	-0.168535
310.161	559.4	1.50145	0.168529
294.861	21.9	1.50056	-0.168466
565.317	88.8	1.49993	-0.168421
382.237	85.8	1.49957	-0.168395
744.9	549.3	1.49951	0.168391
415.252	63.1	1.49862	-0.168328
486.283	315.4	1.49826	-0.168303
474.356	346.8	1.49772	0.168264
768.588	417.3	1.49754	0.168251
436.295	95.3	1.49753	-0.16825
1530.66	33.2	1.49741	-0.168242
1056.93	433.5	1.49715	0.168224
98.5114	396.7	1.49688	-0.168205
880.614	311.4	1.49662	-0.168186
599.265	48.2	1.49603	0.168144
170.98	12.5	1.49593	-0.168137
568.334	367.5	1.49487	0.168061
732.703	503.2	1.49453	-0.168038
142.159	562.1	1.49373	0.16798
515.312	396.5	1.49245	0.16789
1421.18	270	1.49244	-0.167889
1461.68	37.1	1.49175	0.167839
535.318	304.1	1.4908	0.167772
1589.13	495.9	1.4902	0.167729
496.802	272.9	1.49016	0.167726
369.186	565.7	1.48975	0.167697
291.11	359.8	1.48922	0.16766
552.341	383.6	1.488	0.167572
942.786	39.4	1.4879	-0.167565
971.607	364.3	1.48783	0.167561
289.648	563.2	1.4878	0.167558
1007.49	510.9	1.48684	-0.16749
1057.72	37.8	1.4866	-0.167472
1050.74	580.9	1.48646	0.167462
643.905	57.3	1.48578	-0.167414
267.14	352.7	1.48519	0.167372
380.207	556.8	1.48464	0.167333
712.03	591.6	1.48422	0.167303
509.244	301	1.48291	-0.167209
145.897	248.4	1.48283	0.167204
1188.3	472.9	1.48263	0.167189
400.77	87.4	1.48257	-0.167185
106.036	62.6	1.48255	0.167183
902.577	398.3	1.48028	-0.167021
760.735	494.2	1.47983	-0.166989
1495.67	31.2	1.47896	-0.166927
378.899	39.4	1.47893	-0.166925
516.791	446.5	1.47805	0.166862
933.643	542.2	1.478	0.166858
98.013	385	1.47792	-0.166853
1489	393.6	1.47779	0.166843
501.753	440.1	1.47714	-0.166797
461.397	515.4	1.4769	-0.16678
960.562	439.2	1.47654	-0.166754
468.8	589.8	1.47596	0.166713
255.194	360.4	1.47595	-0.166712
147.03	250.1	1.47552	-0.166681
297.145	397	1.47529	-0.166665
390.756	442	1.47525	-0.166661
1511.73	548.4	1.47515	0.166655
1151.25	34.2	1.47513	-0.166653
931.491	590.2	1.47383	-0.16656
676.127	437	1.47366	-0.166548
458.306	96.4	1.47146	-0.16639
275.276	266.4	1.47134	-0.166381
204.594	371	1.47131	-0.16638
204.159	63.9	1.47114	-0.166367
184.96	14.6	1.47071	-0.166336
518.324	343.4	1.46891	0.166208
384.201	550.3	1.46883	0.166201
387.327	324.9	1.4686	0.166185
423.25	90.5	1.46769	0.16612
1553.16	479.6	1.46739	0.166098
731.27	455.3	1.46713	-0.166079
535.289	52.1	1.46654	-0.166037
207.017	514.1	1.46643	-0.166029
810.989	410.1	1.46616	0.16601
309.186	105.8	1.46502	-0.165928
292.624	401.6	1.46314	-0.165793
1543.14	478.3	1.46297	0.16578
988.873	595.7	1.46261	-0.165755
319.664	568.1	1.46208	0.165717
186.955	14.1	1.46106	-0.165643
532.008	37.5	1.46104	-0.165641
1566.05	410.3	1.46066	0.165614
785.925	470.2	1.46046	-0.1656
1552.54	414.4	1.45987	0.165558
120.522	517.3	1.45979	0.165552
129.934	502.9	1.45886	-0.165485
1257.06	279.3	1.45862	-0.165468
816.422	467.5	1.45764	-0.165397
714.845	554.4	1.45729	-0.165372
829.553	522.2	1.45681	0.165337
112.075	374.8	1.456	-0.165279
168.98	13	1.45596	-0.165276
467.346	291.6	1.45595	-0.165275
175.13	517	1.45594	-0.165275
354.299	345.2	1.45569	-0.165257
833.095	511.5	1.45569	0.165256
1379.32	29.7	1.45562	0.165251
166.107	181.3	1.45417	0.165147
389.733	274.5	1.4541	0.165142
1058.11	361.8	1.45315	-0.165073
390.122	505.8	1.45302	0.165064
1483.88	284.1	1.452	0.16499
620.264	372.3	1.45189	-0.164983
617.672	333.1	1.45186	-0.16498
862.484	464.5	1.45126	-0.164937
529.42	553.8	1.45116	0.16493
873.616	546.7	1.45026	0.164865
556.633	44.5	1.44838	0.164729
130.948	18.4	1.44773	0.164682
786.604	40.7	1.44697	-0.164627
1559.34	285.8	1.44615	-0.164567
1347.36	265.6	1.44609	0.164563
1042.26	448	1.44553	0.164523
185.07	48.5	1.44497	-0.164482
508.702	41.4	1.44423	-0.164428
1348.7	35.8	1.44387	-0.164403
598.861	428.5	1.4426	-0.164311
570.257	379.4	1.44222	0.164283
637.262	392.1	1.44194	0.164263
200.2	552.5	1.44189	0.164259
1196.61	39	1.44172	0.164247
682.521	514.1	1.44081	-0.164181
739.601	584.5	1.43965	-0.164097
498.899	38.2	1.43934	-0.164074
1389.09	30.4	1.43888	-0.164041
398.756	22.8	1.43883	0.164038
182.032	36.7	1.4387	0.164028
772.711	43.9	1.4384	-0.164006
852.418	44.6	1.43836	0.164004
262.986	23.7	1.43778	0.163961
239.057	46.9	1.43774	-0.163958
1735.67	393.9	1.43768	0.163954
473.263	440.9	1.43651	0.163869
280.616	384.1	1.43511	0.163767
453.244	535.8	1.43364	0.163661
654.913	46.2	1.43297	-0.163612
437.177	59	1.43203	-0.163543
867.772	41	1.43198	-0.16354
736.854	37	1.43145	-0.163501
534.352	405.6	1.43012	0.163405
1174.85	498.6	1.43003	0.163398
1338.99	282.2	1.42952	0.163361
643.967	46.2	1.42779	0.163235
974.273	38.3	1.4277	-0.163229
815.762	487	1.42725	0.163196
224.958	61.2	1.42682	-0.163164
1232.8	487.7	1.42658	0.163147
803.433	472.5	1.42643	0.163136
578.123	572.5	1.42642	0.163135
140.961	518.5	1.42491	0.163026
631.387	92.3	1.42452	-0.162997
142.869	51	1.42451	0.162996
330.905	18.2	1.42424	0.162976
1202.78	420	1.42334	0.162911
719.438	95.2	1.42325	-0.162904
1093.62	361.3	1.42296	0.162883
1208.21	35	1.42291	0.16288
443.25	430.9	1.42239	0.162842
1225.74	285.2	1.42165	0.162788
577.123	572.5	1.42116	0.162752
257.034	28.3	1.42002	-0.162668
653.846	485.3	1.41953	-0.162633
1213.9	31.3	1.4172	0.162463
230.174	300.3	1.41679	0.162432
505.242	299.3	1.41678	-0.162432
86.5169	271.1	1.41628	-0.162395
322.653	427.3	1.41533	0.162325
1136.67	365.8	1.41476	0.162284
877.802	548.9	1.4142	0.162243
1115.76	475.9	1.41363	0.162201
311.161	561.3	1.41212	0.162091
1547.15	32.5	1.41204	0.162085
1034.79	537.3	1.41195	-0.162078
791.537	484.6	1.41194	-0.162078
111.984	20.7	1.41155	-0.162049
1083.05	505.5	1.41095	0.162005
747.813	41.6	1.41077	-0.161992
284.294	545.8	1.40982	-0.161922
608.867	37	1.40948	0.161897
1085.65	365	1.4091	-0.16187
393.218	393.4	1.40873	-0.161842
524.852	575.5	1.40849	-0.161825
1735.17	393.9	1.40748	0.161751
1211.45	276.3	1.40747	-0.16175
482.264	46.4	1.40723	-0.161732
1372.2	274.2	1.40667	0.161691
1274.48	262.2	1.40614	-0.161652
574.286	499.6	1.4054	-0.161599
388.165	480.1	1.40445	0.161529
327.38	381.2	1.40345	0.161455
351.059	400.2	1.40335	-0.161448
1648.47	272.3	1.40327	0.161442
155.085	505.5	1.40245	0.161382
1565.05	410.1	1.40219	0.161363
644.678	41.6	1.40131	0.161298
1019.69	404.7	1.40095	0.161271
377.054	239.7	1.40091	0.161268
246.169	264.8	1.40018	-0.161215
250.999	312.5	1.39952	0.161166
750.94	381.8	1.39939	0.161157
245.149	56.7	1.39867	0.161104
413.779	96.1	1.39826	-0.161074
106.023	43.4	1.39753	-0.16102
791.478	422.9	1.39666	0.160956
1201.11	502.4	1.39663	0.160954
1463.01	29.9	1.39662	0.160953
899.633	300.5	1.39645	-0.16094
812.61	438.7	1.39639	0.160936
1479.99	403	1.39589	0.160899
758.567	30.1	1.39562	-0.160879
261.216	47	1.39547	0.160868
1247.76	38.1	1.39529	-0.160855
998.728	40.9	1.39502	-0.160835
442.009	572.1	1.39487	0.160824
635.369	491.7	1.39483	-0.160821
89.5061	390.3	1.3937	-0.160737
685.254	572.6	1.39277	0.160669
1249.48	275.9	1.39089	-0.16053
405.28	101.3	1.39073	-0.160518
287.471	420.3	1.3906	0.160508
155.046	371	1.39015	0.160476
986.486	531	1.39	-0.160465
1457.5	276.2	1.38984	0.160453
1020.69	404.6	1.38981	0.16045
1165.73	38.6	1.38946	-0.160425
1174.68	39.6	1.38907	-0.160396
247.107	72.6	1.38892	0.160385
376.353	532.8	1.38892	0.160385
965.004	457.9	1.38838	-0.160345
1504.86	361.9	1.38802	0.160318
473.286	552.1	1.38693	0.160238
262.164	257.6	1.38607	-0.160174
584.485	521.9	1.38576	0.160151
489.572	352	1.38531	0.160118
1534.44	279.5	1.38478	0.160079
309.936	10.6	1.38467	-0.160071
680.578	553.6	1.3834	0.159977
296.293	365.4	1.38312	0.159956
996.68	393.3	1.38296	0.159944
814.469	44.5	1.38193	0.159868
1555.14	277.6	1.38099	-0.159798
1449.49	288.1	1.38058	-0.159768
614.163	575.5	1.38003	0.159727
710.553	523.1	1.37984	0.159713
289.883	15.4	1.37935	-0.159677
947.899	40.6	1.37921	-0.159667
1512.65	273.1	1.37915	-0.159662
1192.33	478.7	1.37845	-0.15961
476.773	86.1	1.37815	-0.159588
1145.74	37.4	1.37814	-0.159587
434.852	39.7	1.37754	-0.159543
585.265	172.5	1.37749	0.159539
1266.94	458.3	1.37725	0.159521
907.572	381.9	1.37704	0.159505
545.34	372	1.37648	-0.159464
1582.71	275.9	1.37538	-0.159382
218.011	540.3	1.37528	0.159375
251.126	282.8	1.37456	0.159322
686.814	40.5	1.37442	-0.159311
265.15	300.5	1.37395	-0.159276
339.215	322.4	1.37385	0.159269
266.638	352.2	1.37275	0.159187
493.309	334.9	1.37205	0.159135
507.361	575.2	1.37205	0.159135
790.549	438.1	1.37155	-0.159098
291.609	359.9	1.37118	0.159071
1564.12	494.8	1.37071	0.159036
1270.72	38.2	1.37062	-0.159029
1193.84	486.4	1.37058	0.159026
588.272	522.8	1.37045	0.159016
1041.51	540.7	1.37026	0.159002
156.093	505.7	1.36954	0.158949
371.296	303.5	1.36947	0.158943
1073.16	410.1	1.36834	0.158859
1215.28	430.4	1.36747	-0.158794
1428.23	31.9	1.36741	-0.15879
1189.73	36.8	1.36703	0.158762
140.985	335.8	1.36626	-0.158704
593.299	311.3	1.3661	0.158693
466.36	471.5	1.36606	-0.158689
702.862	38.5	1.36578	-0.158668
566.319	365.1	1.36571	-0.158664
554.836	432.6	1.36566	-0.15866
672.501	435.7	1.36359	-0.158506
1326.17	37.5	1.36357	-0.158503
860.993	546.3	1.36356	0.158503
1315.36	413.6	1.36352	0.1585
209.945	159.9	1.36334	-0.158486
586.29	592.6	1.3633	0.158484
549.423	300	1.36274	-0.158442
271.232	505.6	1.36225	0.158405
517.382	476.1	1.36208	0.158392
906.571	363.8	1.36201	0.158387
909.585	444.3	1.36192	-0.158381
1074.75	38.1	1.36174	-0.158367
1065.21	474.5	1.3612	0.158327
1056.5	506.5	1.36021	-0.158253
1319.98	279.1	1.35923	-0.15818
1337.07	277.5	1.35923	-0.15818
1050.06	38.8	1.35912	-0.158172
112.297	263	1.35906	-0.158167
757.944	480	1.35905	-0.158167
407.35	494.9	1.35863	0.158135
359.325	299.5	1.35836	-0.158115
544.295	367.1	1.35823	-0.158106
1593.5	416.2	1.35797	0.158086
1031.7	419.1	1.35779	0.158073
269.137	296.9	1.35771	0.158066
826.057	469.9	1.35763	-0.158061
322.963	46.9	1.35653	-0.157978
392.286	348.6	1.35608	-0.157945
1290.9	441.6	1.35572	0.157918
206.047	91.5	1.35565	0.157913
1419.21	272.8	1.35555	-0.157905
333.587	416.8	1.35505	-0.157867
946.995	527.2	1.35461	-0.157834
651.431	77.3	1.35425	-0.157808
338.966	50.3	1.35414	-0.157799
798.03	445.3	1.35406	0.157793
468.281	103.1	1.35384	-0.157777
556.346	326.1	1.35372	-0.157768
744.62	41	1.35364	-0.157762
191.885	64.5	1.35314	0.157724
333.15	473	1.35307	0.15772
1112.67	366.8	1.3526	0.157684
142.077	505.5	1.35207	0.157644
553.249	360.2	1.35101	0.157565
1175.76	38.6	1.35064	-0.157538
98.994	202.3	1.35059	-0.157534
190.016	65.4	1.35058	0.157533
1570.34	276.6	1.35048	-0.157526
483.778	399.3	1.35047	-0.157525
441.375	397.2	1.35011	0.157498
190.917	16.4	1.34956	0.157456
1477.53	30.9	1.34949	0.157451
1205.34	466.5	1.34929	0.157436
612.25	422.9	1.34803	-0.157342
105.981	38	1.3473	-0.157287
934.533	330.7	1.34724	0.157282
280.983	5	1.34714	-0.157275
1031.72	39.6	1.3469	-0.157257
1423.93	418.5	1.3468	0.157249
1424.72	32.7	1.34673	-0.157244
1297.95	459.2	1.34562	0.157161
401.22	530.5	1.3456	-0.157159
658.218	572.2	1.34558	0.157158
501.315	344.3	1.34472	0.157093
1079.3	291.3	1.3444	-0.157069
936.68	498.8	1.34421	-0.157055
1053.6	51.5	1.34418	-0.157053
908.792	37.4	1.34394	-0.157035
897.793	40.5	1.34347	-0.156999
418.146	455	1.34335	-0.15699
1019.49	538.7	1.3429	-0.156957
627.81	489	1.34241	-0.15692
718.834	38.2	1.34191	-0.156882
1426.69	271.5	1.34159	0.156858
1059.16	409.4	1.3413	0.156836
689.556	397	1.34089	-0.156806
986.773	40.8	1.34075	-0.156795
782.502	94.8	1.34062	-0.156785
1029.58	360.7	1.34047	0.156774
102.535	311.5	1.34003	-0.156741
354.93	361.7	1.33992	-0.156733
326.848	32.1	1.33971	0.156717
902.08	403.7	1.33914	-0.156674
302.626	365.4	1.339	0.156663
1572.18	481.5	1.33853	0.156628
996.638	41.1	1.33774	-0.156568
1178.94	265.1	1.3377	-0.156566
494.812	547.2	1.33693	0.156507
296.951	537.1	1.33679	0.156497
362.965	160.7	1.33646	0.156472
551.184	141.7	1.33632	-0.156461
852.55	101.1	1.3349	-0.156355
1216.84	454.6	1.33455	-0.156328
318.195	75.3	1.33402	-0.156288
367.246	502.3	1.33388	-0.156278
1214.58	33.9	1.33283	0.156199
115.094	379.2	1.33149	0.156097
550.184	295.9	1.33087	-0.156051
575.322	427.8	1.33076	-0.156042
110.521	421.9	1.33024	-0.156003
419.239	534.8	1.32929	0.155932
371.276	437.5	1.32872	-0.155888
371.235	100.2	1.32845	-0.155868
1159.36	479.4	1.32812	-0.155843
283.262	448.9	1.32738	0.155787
1404.87	273.1	1.32673	-0.155738
147.063	157.6	1.32666	-0.155733
988.638	352.8	1.32536	0.155634
770.084	490.6	1.32506	-0.155612
257.16	45.5	1.32401	0.155532
506.341	105.2	1.32344	-0.155489
291.88	19.8	1.32309	-0.155463
220.929	15.1	1.32294	0.155451
733.318	386.7	1.32222	-0.155397
472.324	553.2	1.32205	0.155384
676.409	433.4	1.3218	-0.155365
536.317	53	1.32165	-0.155354
616.261	372.9	1.32156	0.155347
434.775	99.3	1.32115	-0.155316
594.49	444.1	1.32107	-0.15531
212.2	330.8	1.32062	-0.155275
420.309	314.4	1.3203	0.155251
984.61	42	1.31909	0.155159
653.369	92.1	1.3186	-0.155122
1262.87	460.4	1.31772	0.155056
336.154	473.4	1.3175	0.155039
285.154	498.1	1.31722	0.155018
376.211	409.6	1.31721	0.155017
147.12	26.1	1.31587	-0.154915
1441.57	277.2	1.31477	0.154831
853.463	564.2	1.31476	0.154831
252.13	322.7	1.31447	0.154809
1052.67	411.4	1.31378	0.154756
785.971	403.8	1.3135	0.154735
682.542	459.1	1.31296	-0.154694
565.259	68.7	1.31287	0.154687
921.29	40.4	1.31252	-0.154661
1128.76	466.7	1.31239	0.154651
779.488	471.1	1.31212	0.15463
790.751	488	1.31183	-0.154608
634.414	590.4	1.31131	-0.154569
90.0078	393.8	1.31109	-0.154552
1170.6	36.4	1.31092	0.154539
1207.71	35.7	1.30945	-0.154427
180.037	229.5	1.30902	0.154394
317.702	103.6	1.30852	-0.154356
735.006	315.9	1.3083	-0.15434
1240.06	282.4	1.30796	0.154313
328.873	17.3	1.30768	0.154293
744.927	347.6	1.30592	-0.154159
301.292	480.6	1.30587	0.154154
433.311	298	1.30573	-0.154144
497.342	397.1	1.30569	-0.154141
1031.8	37.4	1.30517	-0.154101
1150.24	396.1	1.30512	-0.154097
1261.78	275	1.3051	-0.154095
1364.71	35.7	1.30485	-0.154077
534.946	64.4	1.30432	-0.154036
374.252	531.6	1.30427	0.154032
283.966	91.5	1.30298	0.153934
464.335	308.8	1.3029	0.153928
477.375	360.2	1.30263	0.153907
1398.95	270.8	1.30246	-0.153894
1060.75	477.2	1.30236	-0.153887
299.109	535.9	1.30207	-0.153865
111.984	400.4	1.30173	-0.153839
1342.7	482.2	1.30152	-0.153823
1425.55	277.6	1.30138	0.153812
990.556	40.9	1.30133	-0.153808
268.211	207.3	1.30111	0.153792
p = 0.05 threshold
