# Supplementary material for: Plasma acylcarnitine levels increase with healthy aging
Source: Aging (Albany NY). 2020 Jun 16;12(13):13555–70. doi: 10.18632/aging.103462 (PMC7377890; doi:10.18632/aging.103462)
Supplement: Supplementary Table 2 [file aging-12-103462-s001..xlsx]

## Sheet: Supplementary Table 2
Supplementary Table 2. Age-associations of metabolites from anion exchange column. Mass spectral features are reported by mass-to-charge ratio (m/z) and retention time (RT). Significance of association is indicated by -Log(p), and strength and direction of association are indicated by Spearman's rho. Features listed before "FDR 0.2 threshold" passed FDR correction.
m/z	RT	-Log(p)	Spearman's rho
326.087	276.9	5.29499	0.348703
500.277	406.5	4.9914	0.338038
104.107	43.7	4.85387	0.333041
220.067	58	4.50031	0.319811
133.032	62.9	4.18642	-0.30755
423.253	578.5	4.11976	-0.304881
692.442	84	3.90851	-0.29621
150.058	55.6	3.79724	-0.291536
591.306	413.8	3.75187	-0.289607
211.144	12.4	3.70703	0.287686
143.126	18.5	3.49562	-0.278443
145.069	587.2	3.39829	-0.274077
152.054	56.1	3.36996	-0.272793
595.256	520.2	3.34539	0.271674
FDR 0.2 threshold
470.989	561.3	3.23638	0.26665
373.274	144.1	3.16783	-0.263441
184.06	261.7	3.08321	0.259424
736.468	87.3	3.05769	-0.2582
239.091	94.9	2.97187	0.25404
302.877	22.6	2.96539	-0.253723
661.268	405.1	2.96434	0.253672
128.062	539.6	2.93586	-0.252274
548.276	590.6	2.9121	0.251102
118.065	40.8	2.90689	-0.250845
526.292	581.1	2.90235	0.25062
205.097	56.8	2.89575	-0.250293
824.52	76.1	2.8926	-0.250136
147.063	566.2	2.88506	-0.249762
567.325	413.6	2.8782	-0.249421
225.196	576.6	2.86444	-0.248735
274.092	334.3	2.86228	0.248627
694.886	148.3	2.81219	0.246114
611.844	42.8	2.80304	-0.245652
284.961	14.8	2.78855	-0.244918
919.786	42.9	2.7873	-0.244855
560.363	85.9	2.77098	-0.244027
1078.8	47.9	2.7431	-0.242605
1146.71	44.3	2.74118	-0.242506
310.201	56.6	2.73229	0.242051
592.34	551.6	2.73124	0.241997
332.08	55.8	2.72012	-0.241427
294.867	45.4	2.71556	-0.241192
634.804	42.6	2.71075	-0.240945
1141.2	43.7	2.70026	0.240404
483.364	589.5	2.69083	-0.239917
540.366	119.6	2.66273	0.23846
277.02	310.4	2.63673	-0.237104
147.984	555.8	2.63361	-0.23694
289.041	59.1	2.62844	0.236669
568.296	52.3	2.62566	-0.236524
1063.75	42.9	2.6141	0.235917
299.057	546	2.60988	0.235695
1159.21	43.7	2.60884	0.235641
210.121	442.8	2.60849	0.235622
481.356	531.9	2.59262	-0.234786
130.123	529.2	2.57935	0.234084
153.022	335.6	2.5676	0.233461
1540.63	45.5	2.56583	-0.233367
466.316	333.3	2.55109	-0.232583
385.274	591.6	2.54131	0.232061
479.282	44.8	2.53993	-0.231988
304.149	445.2	2.5338	0.23166
450.321	333.1	2.52353	-0.23111
152.1	576.3	2.49803	-0.229739
435.295	532.6	2.4883	-0.229214
243.134	229.4	2.48776	0.229185
1101.26	46.8	2.47385	0.228432
320.08	268.1	2.46495	0.227949
271.165	287.3	2.4624	0.227811
193.086	95.6	2.45586	0.227455
415.304	333.4	2.44148	-0.226671
287.1	249.3	2.43614	0.226379
1079.23	46	2.42309	0.225665
543.327	280.6	2.42247	0.225631
272.259	81.4	2.42086	0.225543
306.279	569	2.4077	0.224819
231.159	16.2	2.40481	-0.22466
103.508	265.9	2.39988	0.224389
241.107	268.3	2.39425	0.224078
176.103	56.5	2.38611	0.223629
1123.75	48.2	2.38383	-0.223502
111.969	564.1	2.38054	0.22332
125	528.7	2.37442	0.222981
223.097	516.4	2.36111	-0.222242
293.086	62.1	2.35338	-0.221811
889.308	43.7	2.35006	-0.221627
569.342	436.8	2.34945	0.221593
172.549	250	2.33646	0.220867
1550.66	44.7	2.32953	0.220479
715.828	42.1	2.31131	-0.219455
458.28	535.3	2.31108	-0.219442
189.001	574.7	2.30255	-0.218962
471.315	223.5	2.2883	0.218157
508.384	533	2.26569	-0.216873
671.352	59	2.24023	-0.21542
569.313	56	2.23632	-0.215196
1489.62	44.1	2.2237	0.214471
352.187	250	2.20708	0.213514
200.201	579.2	2.20116	-0.213172
364.223	249.6	2.17779	0.211817
580.292	517.4	2.16597	0.211128
473.198	566.6	2.15878	0.210708
257.226	480	2.15856	-0.210695
513.338	287	2.15204	0.210314
450.357	98.3	2.14917	0.210146
236.041	56	2.14803	0.210079
448.35	11.3	2.12852	-0.208933
541.369	121.1	2.11515	0.208144
1277.67	44.5	2.10703	0.207664
229.143	580	2.09344	0.206857
106.052	566.6	2.09139	-0.206735
358.277	69.5	2.08442	-0.206321
200.877	35.6	2.08334	-0.206256
523.348	404.7	2.08182	-0.206166
120.065	56.4	2.07245	-0.205607
588.316	399.3	2.06132	0.20494
301.066	93.2	2.05109	0.204327
540.304	527	2.04311	0.203847
140.011	591.4	2.04291	-0.203834
583.991	51.5	2.04063	0.203697
276.652	521.5	2.0386	0.203574
220.118	72	2.01982	0.202439
265.118	249.3	2.01971	0.202433
267.979	62.1	2.00587	-0.201592
842.347	514.5	1.99632	0.20101
247.227	579.5	1.99418	-0.20088
300.024	543.5	1.99314	0.200816
519.324	518.9	1.9848	0.200307
523.805	396.9	1.98448	0.200287
311.205	48.5	1.97869	0.199933
477.316	302.3	1.97799	0.19989
1029.76	43	1.97683	0.199819
157.006	563.7	1.97122	0.199474
540.367	588.3	1.96933	0.199359
156.966	570	1.96901	0.199339
111.009	34.9	1.95943	-0.198749
241.155	49.7	1.95614	0.198547
1337.67	46.1	1.95509	0.198482
500.26	54.9	1.94824	-0.198059
293.172	82.3	1.94586	-0.197912
600.223	518.3	1.93993	0.197545
512.335	82.4	1.93794	0.197422
227.188	213.8	1.92733	-0.196763
1141.7	44.1	1.91581	0.196046
429.376	223.4	1.91235	0.19583
150.091	578.3	1.90114	0.19513
499.348	517.5	1.90101	0.195121
551.313	409.8	1.90078	-0.195107
1007.89	51.1	1.89251	-0.194588
398.327	76	1.89188	0.194549
693.445	79.3	1.8917	-0.194537
987.78	43.1	1.88759	0.194279
104.053	54.8	1.88406	-0.194057
844.351	524	1.88405	-0.194057
494.301	38.4	1.87365	-0.193401
258.624	562.9	1.86271	0.19271
435.021	55.7	1.8554	0.192246
584.258	379.9	1.85458	0.192194
437.861	41.8	1.85278	-0.19208
103.955	544.2	1.85042	-0.19193
820.82	44.3	1.84171	-0.191376
102.034	532.2	1.84055	0.191303
451.301	221.8	1.83715	0.191086
436.299	531.9	1.83449	-0.190916
989.742	44	1.83415	-0.190894
540.316	407.1	1.83015	-0.190639
503.296	584.4	1.82868	-0.190545
330.227	583.6	1.8281	-0.190508
528.343	566.5	1.82623	-0.190388
233.071	60.5	1.82428	0.190263
1214.69	43.8	1.82383	-0.190234
239.2	579.1	1.82006	-0.189993
360.194	62.1	1.8182	-0.189874
173.957	576.7	1.81351	0.189573
161.06	22.3	1.80769	0.189198
98.984	588.2	1.80508	0.18903
358.295	62.1	1.80286	0.188888
1455.62	43.9	1.79729	0.188529
992.714	45	1.7971	-0.188516
215.127	550.1	1.79214	0.188196
145.069	13.6	1.7902	-0.188071
235.169	566.7	1.78302	0.187605
188.071	55.4	1.77973	-0.187393
101.115	522.6	1.77672	0.187197
697.395	57.7	1.77543	-0.187113
219.196	582.6	1.77165	0.186868
164.909	54.3	1.77143	-0.186853
142.034	78.9	1.77065	-0.186803
467.32	328.2	1.77041	-0.186787
1123.18	42.8	1.77025	0.186776
614.233	396.6	1.76897	0.186693
478.328	521.3	1.76249	0.186271
182.947	569.7	1.76231	-0.186259
477.267	61.8	1.76177	-0.186224
251.186	542.5	1.75372	0.185698
412.285	341.7	1.7494	-0.185416
1232.33	394.6	1.73792	-0.184663
338.277	567.8	1.73264	0.184316
418.153	520.9	1.7315	0.184241
793.269	43.5	1.72848	0.184042
1115.68	45.3	1.72374	0.183729
521.329	51.5	1.72329	-0.1837
1207.72	44.3	1.72083	0.183538
845.785	47.8	1.71951	-0.183451
935.764	42.8	1.71931	-0.183437
1348.63	43.8	1.71343	0.183048
609.347	59.8	1.70987	-0.182812
361.22	570.9	1.70397	0.182421
406.683	84.5	1.70372	-0.182404
1124.17	46.2	1.70292	0.182352
151.062	57.2	1.6947	-0.181805
170.154	582.5	1.69348	0.181723
793.898	50.6	1.68926	0.181442
163.112	575.8	1.68688	-0.181283
426.358	110.9	1.679	0.180757
638.848	41.3	1.6682	0.180033
538.35	97.6	1.6676	0.179993
656.35	51.5	1.6632	-0.179697
124.059	560.2	1.66314	0.179693
917.529	57	1.65649	-0.179246
117.751	568.8	1.65394	-0.179074
184.933	12.3	1.65344	-0.17904
344.243	571.4	1.64537	-0.178495
1399.71	43.5	1.64457	-0.178441
525.278	577.9	1.64341	0.178362
702.791	41.9	1.63841	-0.178024
1097.24	44.9	1.63621	-0.177874
246.17	580.8	1.63495	-0.177789
1379.65	44.2	1.63486	0.177783
360.095	55.4	1.6294	-0.177412
266.14	71.3	1.62349	0.17701
150.977	118	1.61976	-0.176756
266.122	249.4	1.61688	0.17656
169.159	573.6	1.61377	-0.176347
1347.7	44.3	1.61352	0.17633
157.133	566.3	1.61135	-0.176182
230.962	597.5	1.6018	-0.175528
1403.61	45.7	1.59915	-0.175346
241.204	19.3	1.59801	-0.175268
130.159	518.7	1.59764	0.175242
155.949	23.8	1.59652	-0.175165
359.007	565.9	1.59475	0.175044
616.264	404	1.59112	-0.174794
780.496	86.8	1.58959	-0.174689
349.139	152.3	1.58829	0.174599
180.102	573.8	1.58621	-0.174456
189.888	17.4	1.58599	-0.174441
291.157	78.9	1.58282	-0.174222
694.385	152.6	1.57985	0.174017
1092.73	45	1.57909	-0.173965
142.086	563.3	1.57842	-0.173918
839.325	317.8	1.57319	-0.173556
174.992	573.8	1.57296	-0.17354
893.284	43.9	1.56395	-0.172916
1177.23	44.2	1.56162	0.172754
307.02	56.1	1.56033	-0.172664
266.884	24.4	1.56011	-0.172649
706.835	42.1	1.55664	0.172407
396.311	65.4	1.55505	0.172296
786.754	41.6	1.55303	-0.172156
534.295	518	1.55239	0.172111
1305.65	46.5	1.55174	0.172066
403.969	569.6	1.55036	-0.171969
304.655	550.1	1.54972	0.171925
199.169	529.7	1.54957	0.171915
119.068	64.5	1.54793	-0.1718
493.312	225.7	1.54768	0.171783
1015.71	43.7	1.54609	-0.171672
1069.74	44.3	1.54563	0.171639
690.827	38.5	1.54473	-0.171576
178.123	565.5	1.5422	-0.1714
148.043	68	1.5421	-0.171392
565.318	59.7	1.52672	-0.170314
303.647	444	1.52551	0.170228
395.878	44.4	1.52425	0.17014
653.374	59.4	1.52395	-0.170119
296.055	310.7	1.52345	-0.170083
342.961	75.6	1.52002	-0.169842
184.073	517.2	1.5187	0.169749
570.318	55.5	1.51789	-0.169692
247.095	44.1	1.51666	0.169605
367.992	567.1	1.51607	0.169564
114.055	84	1.5142	-0.169431
1384.6	45.6	1.51374	0.169399
677.36	137.9	1.50604	0.168854
479.296	570.8	1.50355	-0.168678
908.683	45	1.50343	-0.168669
290.639	278.8	1.5024	0.168596
648.416	82.6	1.49968	-0.168403
283.655	518.8	1.49884	0.168344
369.283	58.5	1.49736	0.168238
140.068	59.3	1.4967	-0.168192
286.201	570	1.49495	-0.168067
1140.23	45.5	1.48979	-0.1677
1382.62	43.3	1.48807	0.167577
1399.63	47.7	1.48378	-0.167271
566.305	513.7	1.47889	0.166922
288.004	570.8	1.47673	-0.166768
138.017	579.8	1.4761	-0.166722
236.957	597.5	1.47343	-0.166531
510.319	155.9	1.47278	0.166485
138.048	58.9	1.47213	-0.166438
481.302	570.2	1.47209	0.166435
117.139	565.7	1.472	-0.166428
108.479	554.2	1.47194	0.166425
576.28	523.6	1.4709	-0.16635
755.988	516.2	1.46656	0.166039
1337.68	514.1	1.46358	0.165824
138.055	14.7	1.46158	-0.165681
482.264	56.4	1.46044	-0.165599
994.684	518.3	1.46012	0.165575
155.047	18.1	1.45795	-0.16542
292.655	564.1	1.45695	0.165347
154.059	50.2	1.45581	0.165265
416.002	568.3	1.45443	-0.165166
336.221	514.3	1.45407	0.16514
481.263	56	1.45244	-0.165022
1087.67	419.6	1.45234	0.165015
279.159	15.4	1.45192	-0.164984
153.077	69.9	1.45094	-0.164914
1522.58	46.7	1.44962	0.164818
272.795	83.4	1.44769	-0.164679
665.191	60.5	1.44604	0.164559
716.393	51.3	1.44473	-0.164465
237.973	62.5	1.44121	0.16421
327.078	583.8	1.43963	0.164096
1235.19	44.6	1.43829	0.163998
207.077	299.3	1.43491	0.163753
1482.67	44.7	1.43447	0.163721
289.012	63.1	1.4298	0.163382
288.217	63.4	1.42753	0.163216
884.721	44.6	1.42729	0.163198
583.255	379.2	1.42718	0.163191
274.215	567.4	1.42379	-0.162944
937.232	44.4	1.42359	0.162929
258.11	528.8	1.42248	0.162848
103.041	54.1	1.42178	-0.162797
1582.61	47	1.41922	0.16261
501.28	411.7	1.41911	0.162602
296.009	57.9	1.41782	-0.162508
127.131	569.3	1.41777	-0.162504
160.968	43.5	1.41575	-0.162357
274.942	37.4	1.4144	-0.162258
1041.69	547.4	1.41366	0.162203
521.293	60.5	1.41251	-0.162119
429.062	59.3	1.41079	-0.161993
785.45	57.1	1.4079	-0.161782
704.788	43.1	1.40623	-0.161659
500.827	37.1	1.40048	-0.161237
1469.63	46.7	1.40039	-0.16123
368.996	571	1.39946	0.161162
455.298	590.5	1.39891	0.161121
841.341	515.8	1.39756	0.161022
242.284	565.6	1.39579	-0.160892
443.074	70.3	1.39402	-0.160761
185.081	13	1.39136	-0.160565
543.325	36	1.38892	0.160384
278.639	275.3	1.38711	0.160251
214.953	597.8	1.38539	-0.160124
1018.23	43.9	1.37965	0.159699
431.299	329.1	1.37904	-0.159654
909.797	43.5	1.37873	-0.159631
129.979	26.1	1.37723	-0.159519
440.148	522.5	1.377	0.159503
230.158	50	1.37675	0.159484
479.84	44.5	1.37492	0.159348
466.009	21.6	1.37282	-0.159193
1064.25	44.9	1.37277	-0.159189
685.347	42.7	1.37207	-0.159137
328.074	517.7	1.36974	0.158963
198.907	11.4	1.36748	-0.158795
875.805	44.8	1.36639	-0.158714
841.77	42.6	1.36605	-0.158689
501.279	569.5	1.36493	0.158605
314.031	519.1	1.36077	0.158295
743.427	57.1	1.35789	-0.15808
382.709	60.4	1.35722	-0.15803
581.294	58.9	1.35585	-0.157927
230.038	52.5	1.3557	0.157916
336.872	23	1.34956	-0.157457
117.102	535.9	1.34885	-0.157403
608.796	40.7	1.34804	0.157342
913.343	440.5	1.34759	0.157309
1176.19	44.1	1.34661	0.157235
591.181	60.4	1.34649	0.157226
320.083	127.5	1.34619	0.157204
1067.26	45.7	1.34557	0.157157
1249.7	45.4	1.34355	0.157006
430.947	400.7	1.34093	-0.156808
129.992	25.8	1.33465	0.156336
414.301	579.8	1.33354	0.156252
300.144	524.8	1.3332	0.156226
426.233	56.5	1.32565	-0.155656
695.194	55.3	1.32434	0.155557
701.322	43.3	1.32139	0.155334
1024.24	44.4	1.32074	0.155285
489.931	53.8	1.3205	-0.155266
1298.66	43.5	1.31797	0.155075
536.298	56.5	1.31685	-0.15499
131.118	571.3	1.31441	0.154804
372.311	71.2	1.31351	0.154736
288.16	524.1	1.31349	0.154734
900.27	45.2	1.31141	-0.154577
1448.63	46.3	1.31135	0.154571
443.985	598	1.31048	-0.154505
297.147	524.6	1.31018	0.154483
205.126	51.2	1.31016	0.154481
152.071	580.1	1.30639	-0.154194
499.565	517.5	1.30621	0.15418
407.109	60.5	1.30234	0.153885
p = 0.05 threshold
