# Supplementary material for: Plasma acylcarnitine levels increase with healthy aging
Source: Aging (Albany NY). 2020 Jun 16;12(13):13555–70. doi: 10.18632/aging.103462 (PMC7377890; doi:10.18632/aging.103462)
Supplement: Supplementary Table 4 [file aging-12-103462-s002..xlsx]

## Sheet: Supplementary Table 4
Supplementary Table 4. Annotations of age-associated metabolites from anion exchange column. Metabolites are reported by mass-to-charge ratio (m/z) and retention time (RT). In the case that multiple matches were provided for annotation, all have been listed and grouped. Expand group to view.
m/z	RT (s)	chemical_ID	Schymanski level of confidence	Name	Formula	Adduct	-Log10(p)	Spearman's rho
326.087	276.9	Multiple matches: Expand group.
326.087	276.9	HMDB14821	3	Midazolam	C18H13ClFN3	M+H	5.29462	0.348703
326.087	276.9	HMDB59997	3	Dihyroxy-1H-indole glucuronide I	C14H15NO8	M+H	5.29462	0.348703
500.277	406.5	Multiple matches: Expand group.
500.277	406.5	HMDB11489	3	LysoPE(0:020:5(5Z8Z11Z14Z17Z))	C25H42NO7P	M+H	4.99201	0.338038
500.277	406.5	HMDB11519	3	LysoPE(20:5(5Z8Z11Z14Z17Z)0:0)	C25H42NO7P	M+H	4.99201	0.338038
500.277	406.5	LMGP02050053	3	(2-aminoethoxy)(2R)-3-hydroxy-2-(5Z8Z11Z14Z17Z)-icosa-58111417-pentaenoyloxypropoxyphosphinic acid	C25H42NO7P	M+H	4.99201	0.338038
500.277	406.5	LMGP02050027	3	1-(5Z8Z11Z14Z17Z-eicosapentaenoyl)-glycero-3-phosphoethanolamine	C25H42NO7P	M+H	4.99201	0.338038
104.107	43.7	HMDB31259	3	Neurine	C5H13NO	M+H	4.854	0.333041
220.067	58	Multiple matches: Expand group.
220.067	58	HMDB03148	3	Argininic acid	C6H13N3O3	M+2Na-H	4.50003	0.319811
220.067	58	HMDB00904	3	Citrulline	C6H13N3O3	M+2Na-H	4.50003	0.319811
133.032	62.9	HMDB59667	3	3-Methyl sulfolene	C5H8O2S	M+H	4.18648	-0.30755
423.253	578.5	LMGP10050002	3	1-(9Z-heptadecenoyl)-sn-glycero-3-phosphate	C20H39O7P	M+H	4.12001	-0.304881
150.058	55.6	Multiple matches: Expand group.
150.058	55.6	HMDB14997	3	Penicillamine	C5H11NO2S	M+H	3.79724	-0.291536
150.058	55.6	HMDB59667	3	3-Methyl sulfolene	C5H8O2S	M+NH4	3.79724	-0.291536
150.058	55.6	HMDB33951	3	Racemethionine	C5H11NO2S	M+H	3.79724	-0.291536
150.058	55.6	HMDB00696	3	L-Methionine	C5H11NO2S	M+H	3.79724	-0.291536
211.144	12.4	HMDB34276	3	LL-Cyclo(leucylprolyl)	C11H18N2O2	M+H	3.70703	0.287686
145.069	587.2	HMDB31698	3	S-(3-Methyl-2-butenyl) ethanethioate	C7H12OS	M+H	3.39829	-0.274077
152.054	56.1	Multiple matches: Expand group.
152.054	56.1	HMDB33951	3	Racemethionine	C5H11NO2S	M+H_[+2]	3.36996	-0.272793
152.054	56.1	HMDB00696	3	L-Methionine	C5H11NO2S	M+H_[+2]	3.36996	-0.272793
152.054	56.1	HMDB14997	3	Penicillamine	C5H11NO2S	M+H_[+2]	3.36996	-0.272793
373.274	144.1	Multiple matches: Expand group.
373.274	144.1	HMDB14629	3	Nabilone	C24H36O3	M+H	3.16783	-0.263441
373.274	144.1	HMDB41301	3	(3R 6Z)-34-Dihydro-8-hydroxy-3-(6-pentadecenyl)-1H-2-benzopyran-1-one	C24H36O3	M+H	3.16783	-0.263441
373.274	144.1	HMDB13627	3	Cervonoyl ethanolamide	C24H36O3	M+H	3.16783	-0.263441
373.274	144.1	LMST04010376	3	3-Oxo-5beta-chol-8-en-24-oic Acid	C24H36O3	M+H	3.16783	-0.263441
373.274	144.1	LMST04010379	3	3-Oxo-5beta-chol-6-en-24-oic Acid	C24H36O3	M+H	3.16783	-0.263441
373.274	144.1	LMST04010436	3	3beta-Hydroxychola-516-dien-24-oic Acid	C24H36O3	M+H	3.16783	-0.263441
373.274	144.1	LMST04010377	3	3-Oxo-5beta-chol-8(14)-en-24-oic Acid	C24H36O3	M+H	3.16783	-0.263441
373.274	144.1	LMST04010299	3	3alpha-Hydroxy-5beta-chola-814-dien-24-oic Acid	C24H36O3	M+H	3.16783	-0.263441
373.274	144.1	LMST04010408	3	3-Oxo-5beta14beta-chol-8-en-24-oic Acid	C24H36O3	M+H	3.16783	-0.263441
373.274	144.1	LMST04010297	3	3-Oxo-5beta-chol-7-en-24-oic Acid	C24H36O3	M+H	3.16783	-0.263441
373.274	144.1	LMST04010433	3	3beta-Hydroxychola-57-dien-24-oic Acid	C24H36O3	M+H	3.16783	-0.263441
373.274	144.1	LMST04010320	3	(20S22E)-3beta-Hydroxychola-522-dien-24-oic Acid	C24H36O3	M+H	3.16783	-0.263441
373.274	144.1	LMST04010296	3	3-Oxo-5beta-chol-14-en-24-oic Acid	C24H36O3	M+H	3.16783	-0.263441
373.274	144.1	LMST04010340	3	(22E)-3beta-Hydroxy-5alpha-chola-1622-dien-24-oic Acid	C24H36O3	M+H	3.16783	-0.263441
373.274	144.1	LMST04010321	3	(22E)-3beta-Hydroxychola-522-dien-24-oic Acid	C24H36O3	M+H	3.16783	-0.263441
373.274	144.1	LMST04010437	3	(20S)-3beta-Hydroxychola-516-dien-24-oic Acid	C24H36O3	M+H	3.16783	-0.263441
373.274	144.1	LMST03020021	3	(5Z7E)-(3S)-3-hydroxy-910-seco-5710(19)-cholatrien-24-oic acid	C24H36O3	M+H	3.16783	-0.263441
373.274	144.1	LMST04010293	3	3-Oxo-5beta-chol-9(11)-en-24-oic Acid	C24H36O3	M+H	3.16783	-0.263441
373.274	144.1	LMST04010329	3	3alpha-Hydroxy-5beta-chola-8(14)11-dien-24-oic Acid	C24H36O3	M+H	3.16783	-0.263441
373.274	144.1	LMST04010233	3	3-oxochol-4-en-24-oic acid	C24H36O3	M+H	3.16783	-0.263441
373.274	144.1	LMST04010287	3	(22E)-3beta-Hydroxy-5alpha-chola-722-dien-24-oic Acid	C24H36O3	M+H	3.16783	-0.263441
373.274	144.1	LMST04010330	3	3alpha-Hydroxy-5beta-chola-79(11)-dien-24-oic Acid	C24H36O3	M+H	3.16783	-0.263441
373.274	144.1	LMST04010275	3	3-Oxo-5beta-chol-1-en-24-oic Acid	C24H36O3	M+H	3.16783	-0.263441
184.06	261.7	HMDB00017	3	4-Pyridoxic acid	C8H9NO4	M+H	3.08321	0.259424
239.091	94.9	Multiple matches: Expand group.
239.091	94.9	HMDB31771	3	1-(245-Trimethoxyphenyl)-12-propanedione	C12H14O5	M+H	2.97187	0.25404
239.091	94.9	HMDB11721	3	Trans-2 3 4-Trimethoxycinnamate	C12H14O5	M+H	2.97187	0.25404
239.091	94.9	HMDB02511	3	345-Trimethoxycinnamic acid	C12H14O5	M+H	2.97187	0.25404
302.877	22.6	HMDB29628	3	Chlorthal	C8H2Cl4O4	M+H	2.96539	-0.253723
548.276	590.6	Multiple matches: Expand group.
548.276	590.6	HMDB11526	3	LysoPE(22:6(4Z7Z10Z13Z16Z19Z)0:0)	C27H44NO7P	M+Na	2.9121	0.251102
548.276	590.6	HMDB11496	3	LysoPE(0:022:6(4Z7Z10Z13Z16Z19Z))	C27H44NO7P	M+Na	2.9121	0.251102
548.276	590.6	LMGP02050013	3	1-(4Z7Z10Z13Z16Z19Z-docosahexaenoyl)-glycero-3-phosphoethanolamine	C27H44NO7P	M+Na	2.9121	0.251102
548.276	590.6	LMGP02050060	3	(2-aminoethoxy)(2R)-2-(4Z7Z10Z13Z16Z19Z)-docosa-4710131619-hexaenoyloxy-3-hydroxypropoxyphosphinic acid	C27H44NO7P	M+Na	2.9121	0.251102
118.065	40.8	Multiple matches: Expand group.
118.065	40.8	HMDB00738	3	Indole	C8H7N	M+H	2.90689	-0.250845
118.065	40.8	HMDB34171	3	Benzeneacetonitrile	C8H7N	M+H	2.90689	-0.250845
526.292	581.1	Multiple matches: Expand group.
526.292	581.1	HMDB11496	3	LysoPE(0:022:6(4Z7Z10Z13Z16Z19Z))	C27H44NO7P	M+H	2.90235	0.25062
526.292	581.1	HMDB11526	3	LysoPE(22:6(4Z7Z10Z13Z16Z19Z)0:0)	C27H44NO7P	M+H	2.90235	0.25062
526.292	581.1	LMGP02050013	3	1-(4Z7Z10Z13Z16Z19Z-docosahexaenoyl)-glycero-3-phosphoethanolamine	C27H44NO7P	M+H	2.90235	0.25062
526.292	581.1	LMGP02050060	3	(2-aminoethoxy)(2R)-2-(4Z7Z10Z13Z16Z19Z)-docosa-4710131619-hexaenoyloxy-3-hydroxypropoxyphosphinic acid	C27H44NO7P	M+H	2.90235	0.25062
205.097	56.8	Multiple matches: Expand group.
205.097	56.8	HMDB14892	3	Ethotoin	C11H12N2O2	M+H	2.89575	-0.250293
205.097	56.8	HMDB60967	3	S-nirvanol	C11H12N2O2	M+H	2.89575	-0.250293
205.097	56.8	HMDB13609	3	D-Tryptophan	C11H12N2O2	M+H	2.89575	-0.250293
205.097	56.8	HMDB30396	3	()-Tryptophan	C11H12N2O2	M+H	2.89575	-0.250293
205.097	56.8	HMDB60878	3	4-Hydroxyantipyrine	C11H12N2O2	M+H	2.89575	-0.250293
205.097	56.8	HMDB00734	3	Indoleacrylic acid	C11H9NO2	M+NH4	2.89575	-0.250293
205.097	56.8	HMDB00929	3	L-Tryptophan	C11H12N2O2	M+H	2.89575	-0.250293
205.097	56.8	HMDB60533	3	Nirvanol	C11H12N2O2	M+H	2.89575	-0.250293
205.097	56.8	HMDB13840	3	3-Hydroxymethylantipyrine	C11H12N2O2	M+H	2.89575	-0.250293
205.097	56.8	HMDB33249	3	6-Chloro-N-(1-methylethyl)-135-triazine-24-diamine	C6H10ClN5	M+NH4	2.89575	-0.250293
225.196	576.6	HMDB30290	3	Cuscohygrine	C13H24N2O	M+H	2.86444	-0.248735
274.092	334.3	HMDB14883	3	Modafinil	C15H15NO2S	M+H	2.86228	0.248627
310.201	56.6	Multiple matches: Expand group.
310.201	56.6	HMDB15334	3	Nadolol	C17H27NO4	M+H	2.73229	0.242051
310.201	56.6	HMDB15345	3	Metipranolol	C17H27NO4	M+H	2.73229	0.242051
310.201	56.6	LMFA07070016	3	3-(2E5Z7E)-deca-257-trienoyloxy-4-(trimethylazaniumyl)butanoate	C17H27NO4	M+H	2.73229	0.242051
540.366	119.6	LMGP03060001	3	1-eicosyl-glycero-3-phosphoserine	C26H54NO8P	M+H	2.66273	0.23846
299.057	546	Multiple matches: Expand group.
299.057	546	HMDB33859	3	Glyzaglabrin	C16H10O6	M+H	2.60988	0.235695
299.057	546	HMDB30562	3	38-Dihydroxy-9-methoxycoumestan	C16H10O6	M+H	2.60988	0.235695
299.057	546	HMDB34139	3	Trifoliol	C16H10O6	M+H	2.60988	0.235695
299.057	546	HMDB36305	3	Isotrifoliol	C16H10O6	M+H	2.60988	0.235695
299.057	546	HMDB33820	3	Irilone	C16H10O6	M+H	2.60988	0.235695
299.057	546	HMDB30830	3	38-Dihydroxy-1-methylanthraquinone-2-carboxylic acid	C16H10O6	M+H	2.60988	0.235695
299.057	546	HMDB35914	3	Aflatoxin P1	C16H10O6	M+H	2.60988	0.235695
299.057	546	HMDB33722	3	Sativol	C16H10O6	M+H	2.60988	0.235695
299.057	546	LMPK12113392	3	-	C16H10O6	M+H	2.60988	0.235695
299.057	546	LMPK12113391	3	-	C16H10O6	M+H	2.60988	0.235695
299.057	546	LMPK12050383	3	54-Dihydroxy-67-methylenedioxyisoflavone	C16H10O6	M+H	2.60988	0.235695
299.057	546	LMPK12050366	3	52-Dihydroxy-67-methylenedioxyisoflavone	C16H10O6	M+H	2.60988	0.235695
299.057	546	LMPK12050085	3	72-Dihydroxy-34-methylenedioxyisoflavone	C16H10O6	M+H	2.60988	0.235695
299.057	546	LMPK12090036	3	49-Dihydroxy-3-methoxycoumestan	C16H10O6	M+H	2.60988	0.235695
299.057	546	LMPK12100059	3	45-Dihydroxy-7-methoxy-52-oxido-4-phenylcoumarin	C16H10O6	M+H	2.60988	0.235695
299.057	546	LMPK12050082	3	-	C16H10O6	M+H	2.60988	0.235695
299.057	546	LMPK12090026	3	712-Dihydroxy-11-methoxycoumestan	C16H10O6	M+H	2.60988	0.235695
299.057	546	LMPK12160015	3	72-Dihydroxy-45-methylenedioxy-3-phenylcoumarin	C16H10O6	M+H	2.60988	0.235695
299.057	546	LMPK12111168	3	-	C16H10O6	M+H	2.60988	0.235695
299.057	546	LMPK12080050	3	-	C16H10O6	M+H	2.60988	0.235695
299.057	546	LMPK12050252	3	-	C16H10O6	M+H	2.60988	0.235695
299.057	546	LMPK12090030	3	37-Dihydroxy-9-methoxycoumestan	C16H10O6	M+H	2.60988	0.235695
481.356	531.9	Multiple matches: Expand group.
481.356	531.9	HMDB41130	3	24-Epibrassinolide	C28H48O6	M+H	2.59262	-0.234786
481.356	531.9	HMDB34081	3	Brassinolide	C28H48O6	M+H	2.59262	-0.234786
481.356	531.9	LMST04040001	3	3alpha7alpha12alpha24-tetrahydroxy-24-methyl-5beta-cholestan-26-oic acid	C28H48O6	M+H	2.59262	-0.234786
481.356	531.9	LMST01080072	3	(25R)-alpha-spirostan-3beta6alpha11alpha23S-tetrol	C28H48O6	M+H	2.59262	-0.234786
481.356	531.9	LMST01140002	3	(22R23R)-2alpha3alpha2223-tetrahydroxy-7a-homo-7-oxa-5alpha-ergostan-6-one	C28H48O6	M+H	2.59262	-0.234786
481.356	531.9	LMST01140001	3	2alpha3alpha22R23R-tetrahydroxy-67-seco-5-campestano-67-lactone	C28H48O6	M+H	2.59262	-0.234786
130.123	529.2	LMFA08020142	3	N-methyl hexanoyl amine	C7H15NO	M+H	2.57935	0.234084
153.022	335.6	HMDB15167	3	Mercaptopurine	C5H4N4S	M+H	2.5676	0.233461
466.316	333.3	Multiple matches: Expand group.
466.316	333.3	HMDB00138	3	Glycocholic acid	C26H43NO6	M+H	2.55109	-0.232583
466.316	333.3	HMDB32596	3	Sodium glycocholate	C26H43NO6	M+H	2.55109	-0.232583
466.316	333.3	HMDB00331	3	3a7b12a-Trihydroxyoxocholanyl-Glycine	C26H43NO6	M+H	2.55109	-0.232583
466.316	333.3	LMST05030001	3	N-(3alpha7alpha12alpha-trihydroxy-5beta-cholan-24-oyl)-glycine	C26H43NO6	M+H	2.55109	-0.232583
466.316	333.3	LMST05030007	3	-	C26H43NO6	M+H	2.55109	-0.232583
385.274	591.6	Multiple matches: Expand group.
385.274	591.6	HMDB36425	3	Persicachrome	C25H36O3	M+H	2.54131	0.232061
385.274	591.6	HMDB34952	3	Persicaxanthin	C25H36O3	M+H	2.54131	0.232061
479.282	44.8	Multiple matches: Expand group.
479.282	44.8	HMDB15220	3	Iloprost	C30H38O5	M+H	2.53993	-0.231988
479.282	44.8	LMPK12120523	3	3-Geranyl-4246-tetrahydroxy-5-prenyldihydrochalcone	C30H38O5	M+H	2.53993	-0.231988
304.149	445.2	Multiple matches: Expand group.
304.149	445.2	HMDB15061	3	Phenoxybenzamine	C18H22ClNO	M+H	2.5338	0.23166
304.149	445.2	HMDB39423	3	N5-Acetyl-N2-gamma-L-glutamyl-L-ornithine	C12H21N3O6	M+H	2.5338	0.23166
450.321	333.1	Multiple matches: Expand group.
450.321	333.1	HMDB00631	3	Deoxycholic acid glycine conjugate	C26H43NO5	M+H	2.52353	-0.23111
450.321	333.1	HMDB00637	3	Chenodeoxycholic acid glycine conjugate	C26H43NO5	M+H	2.52353	-0.23111
450.321	333.1	HMDB00708	3	Glycoursodeoxycholic acid	C26H43NO5	M+H	2.52353	-0.23111
450.321	333.1	HMDB06898	3	Chenodeoxyglycocholic acid	C26H43NO5	M+H	2.52353	-0.23111
450.321	333.1	LMST05030008	3	N-(3alpha7alpha-dihydroxy-5beta-cholan-24-oyl)-glycine	C26H43NO5	M+H	2.52353	-0.23111
450.321	333.1	LMST05030016	3	N-(3alpha7beta-dihydroxy-5beta-cholan-24-oyl)-glycine	C26H43NO5	M+H	2.52353	-0.23111
450.321	333.1	LMST05030006	3	N-(3alpha12alpha-dihydroxy-5beta-cholan-24-oyl)glycine	C26H43NO5	M+H	2.52353	-0.23111
450.321	333.1	LMST05030003	3	N-(3alpha7alpha-dihydroxy-5beta-cholan-24-oyl)-glycine	C26H43NO5	M+H	2.52353	-0.23111
435.295	532.6	Multiple matches: Expand group.
435.295	532.6	HMDB37183	3	Polysorbate 60	C22H42O8	M+H	2.4883	-0.229214
435.295	532.6	LMST03020054	3	(5Z7E)-(1S3R20R)-910-seco-22-thia-5710(19)-cholestatriene-1325-triol	C26H42O3S	M+H	2.4883	-0.229214
435.295	532.6	LMST03020053	3	(5Z7E)-(1S3R)-910-seco-22-thia-5710(19)-cholestatriene-1325-triol	C26H42O3S	M+H	2.4883	-0.229214
435.295	532.6	LMST03020050	3	(5E7E)-(1R3S)-125-dihydroxy-910-seco-3-thia-5710(19)-cholestatriene 3-oxide	C26H42O3S	M+H	2.4883	-0.229214
435.295	532.6	LMST03020051	3	(5Z7E)-(1R3R)-125-dihydroxy-910-seco-3-thia-5710(19)-cholestatriene 3-oxide	C26H42O3S	M+H	2.4883	-0.229214
435.295	532.6	LMST03020049	3	(5E7E)-(1R3R)-125-dihydroxy-910-seco-3-thia-5710(19)-cholestatriene 3-oxide	C26H42O3S	M+H	2.4883	-0.229214
435.295	532.6	LMST03020052	3	(5Z7E)-(1R3S)-125-dihydroxy-910-seco-3-thia-5710(19)-cholestatrien 3-oxide	C26H42O3S	M+H	2.4883	-0.229214
435.295	532.6	LMST03020055	3	(5Z7E)-(1S3R)-910-seco-23-thia-5710(19)-cholestatriene-1325-triol	C26H42O3S	M+H	2.4883	-0.229214
193.086	95.6	Multiple matches: Expand group.
193.086	95.6	HMDB40446	3	Benzyl acetoacetate	C11H12O3	M+H	2.45586	0.227455
193.086	95.6	HMDB31623	3	Ethyl phenylglycidate	C11H12O3	M+H	2.45586	0.227455
193.086	95.6	HMDB35894	3	(Z)-4-Methoxy-6-(1-propenyl)-13-benzodioxole	C11H12O3	M+H	2.45586	0.227455
193.086	95.6	HMDB41007	3	1-Hydroxychavicol acetate	C11H12O3	M+H	2.45586	0.227455
193.086	95.6	HMDB40268	3	Ethyl 3-oxo-3-phenylpropanoate	C11H12O3	M+H	2.45586	0.227455
193.086	95.6	HMDB35873	3	Myristicin	C11H12O3	M+H	2.45586	0.227455
193.086	95.6	HMDB37877	3	Eugenyl formate	C11H12O3	M+H	2.45586	0.227455
193.086	95.6	HMDB32591	3	Dehydrozingerone	C11H12O3	M+H	2.45586	0.227455
193.086	95.6	HMDB37277	3	Isoeugenol formate	C11H12O3	M+H	2.45586	0.227455
193.086	95.6	HMDB30580	3	(R)-Shinanolone	C11H12O3	M+H	2.45586	0.227455
193.086	95.6	HMDB31610	3	Allyl phenoxyacetate	C11H12O3	M+H	2.45586	0.227455
193.086	95.6	HMDB35275	3	Isomyristicin	C11H12O3	M+H	2.45586	0.227455
193.086	95.6	HMDB30752	3	Methyl trans-p-methoxycinnamate	C11H12O3	M+H	2.45586	0.227455
193.086	95.6	HMDB41481	3	4-(34-Methylenedioxyphenyl)-2-butanone	C11H12O3	M+H	2.45586	0.227455
287.1	249.3	Multiple matches: Expand group.
287.1	249.3	HMDB13895	3	34-Dihydrodiol	C15H14N2O4	M+H	2.43614	0.226379
287.1	249.3	HMDB04259	3	Acetyl-N-formyl-5-methoxykynurenamine	C13H16N2O4	M+Na	2.43614	0.226379
287.1	249.3	HMDB06344	3	Alpha-N-Phenylacetyl-L-glutamine	C13H16N2O4	M+Na	2.43614	0.226379
287.1	249.3	HMDB60866	3	Phenytoin dihydrodiol	C15H14N2O4	M+H	2.43614	0.226379
287.1	249.3	HMDB61136	3	di-Hydroxymelatonin	C13H16N2O4	M+Na	2.43614	0.226379
543.327	280.6	Multiple matches: Expand group.
543.327	280.6	HMDB10397	3	LysoPC(20:5(5Z8Z11Z14Z17Z))	C28H48NO7P	M+H_[+1]	2.42247	0.225631
543.327	280.6	LMGP01050050	3	1-(5Z8Z11Z14Z17Z-eicosapentaenoyl)-sn-glycero-3-phosphocholine	C28H48NO7P	M+H_[+1]	2.42247	0.225631
272.259	81.4	Multiple matches: Expand group.
272.259	81.4	LMFA08040042	3	N-(Tetradecanoyl)-ethanolamine	C16H33NO2	M+H	2.42086	0.225543
272.259	81.4	LMFA01100016	3	2R-aminohexadecanoic acid	C16H33NO2	M+H	2.42086	0.225543
272.259	81.4	LMFA01100018	3	2-amino-hexadecanoic acid	C16H33NO2	M+H	2.42086	0.225543
272.259	81.4	LMFA01100017	3	2S-aminohexadecanoic acid	C16H33NO2	M+H	2.42086	0.225543
272.259	81.4	LMSP01040008	3	Hexadecasphing-4E-enine	C16H33NO2	M+H	2.42086	0.225543
306.279	569	LMSP01080053	3	(9aS)-6S-(deca-13E-dienyl)-4S-methyloctahydro-1H-quinolizin-3R-ol	C20H35NO	M+H	2.4077	0.224819
231.159	16.2	Multiple matches: Expand group.
231.159	16.2	HMDB30143	3	Talaromycin A	C12H22O4	M+H	2.40481	-0.22466
231.159	16.2	HMDB41613	3	Bis(1-methylethyl) hexanedioate	C12H22O4	M+H	2.40481	-0.22466
231.159	16.2	HMDB41614	3	Dipropyl hexanedioate	C12H22O4	M+H	2.40481	-0.22466
231.159	16.2	HMDB00623	3	Dodecanedioic acid	C12H22O4	M+H	2.40481	-0.22466
231.159	16.2	LMFA07010841	3	16-dipropyl hexanedioate	C12H22O4	M+H	2.40481	-0.22466
231.159	16.2	LMFA01170009	3	Dodecanedioic acid	C12H22O4	M+H	2.40481	-0.22466
231.159	16.2	LMFA07010790	3	16-bis(propan-2-yl) hexanedioate	C12H22O4	M+H	2.40481	-0.22466
241.107	268.3	Multiple matches: Expand group.
241.107	268.3	HMDB30254	3	3-(345-Trimethoxyphenyl)propanoic acid	C12H16O5	M+H	2.39425	0.224078
241.107	268.3	HMDB61112	3	3-Carboxy-4-methyl-5-propyl-2-furanpropionic acid	C12H16O5	M+H	2.39425	0.224078
241.107	268.3	HMDB41756	3	Isopropyl 3-(34-dihydroxyphenyl)-2-hydroxypropanoate	C12H16O5	M+H	2.39425	0.224078
241.107	268.3	HMDB38627	3	Ethyl 345-trimethoxybenzoate	C12H16O5	M+H	2.39425	0.224078
241.107	268.3	LMFA01150004	3	3-carboxy-4-methyl-5-propyl-2-furanpropanoic acid	C12H16O5	M+H	2.39425	0.224078
176.103	56.5	Multiple matches: Expand group.
176.103	56.5	HMDB03148	3	Argininic acid	C6H13N3O3	M+H	2.38611	0.223629
176.103	56.5	HMDB00904	3	Citrulline	C6H13N3O3	M+H	2.38611	0.223629
223.097	516.4	Multiple matches: Expand group.
223.097	516.4	HMDB31668	3	Dihydrodeoxy-8-epiaustdiol	C12H14O4	M+H	2.36111	-0.222242
223.097	516.4	HMDB29470	3	Isodillapiole	C12H14O4	M+H	2.36111	-0.222242
223.097	516.4	HMDB34056	3	5-(34-Methylenedioxyphenyl)pentanoic acid	C12H14O4	M+H	2.36111	-0.222242
223.097	516.4	HMDB30725	3	Dillapiol	C12H14O4	M+H	2.36111	-0.222242
223.097	516.4	HMDB33776	3	Apiole	C12H14O4	M+H	2.36111	-0.222242
223.097	516.4	HMDB29226	3	5-(3-Methoxy-4-hydroxyphenyl)-gamma-valerolactone	C12H14O4	M+H	2.36111	-0.222242
223.097	516.4	HMDB37681	3	Vanillin isobutyrate	C12H14O4	M+H	2.36111	-0.222242
223.097	516.4	HMDB38563	3	(Z)-3-(245-Trimethoxyphenyl)-2-propenal	C12H14O4	M+H	2.36111	-0.222242
223.097	516.4	HMDB02056	3	Monoisobutyl phthalic acid	C12H14O4	M+H	2.36111	-0.222242
223.097	516.4	HMDB13247	3	Monobutylphthalate	C12H14O4	M+H	2.36111	-0.222242
223.097	516.4	HMDB37130	3	Piperonyl isobutyrate	C12H14O4	M+H	2.36111	-0.222242
223.097	516.4	HMDB41379	3	23-Dihydro-3-hydroxy-6-methoxy-22-dimethyl-4H-1-benzopyran-4-one	C12H14O4	M+H	2.36111	-0.222242
223.097	516.4	LMFA01170008	3	2E4E8E10E-Dodecatetraenedioic acid	C12H14O4	M+H	2.36111	-0.222242
889.308	43.7	Multiple matches: Expand group.
889.308	43.7	LMPK12112571	3	-	C43H52O20	M+H	2.35006	-0.221627
889.308	43.7	LMPK12112572	3	-	C43H52O20	M+H	2.35006	-0.221627
569.342	436.8	Multiple matches: Expand group.
569.342	436.8	HMDB35388	3	(24E)-3alpha15alpha-Diacetoxy-23-oxo-79(11)24-lanostatrien-26-oic acid	C34H48O7	M+H	2.34945	0.221593
569.342	436.8	LMST01080012	3	(25R)-2-O-benzoyl-spirostan-2alpha3beta5alpha6beta-tetrol	C34H48O7	M+H	2.34945	0.221593
569.342	436.8	LMPR0106040002	3	(-)-6beta16beta-diacetoxy-37-dioxofusida-17(20)Z24-diene-21-oic acid	C34H48O7	M+H	2.34945	0.221593
471.315	223.5	Multiple matches: Expand group.
471.315	223.5	HMDB35113	3	1723-Epoxy-29-hydroxy-27-norlanost-8-ene-31524-trione	C29H42O5	M+H	2.2883	0.218157
471.315	223.5	HMDB35970	3	(3beta17alpha23S)-1723-Epoxy-329-dihydroxy-27-norlanosta-79(11)-diene-1524-dione	C29H42O5	M+H	2.2883	0.218157
471.315	223.5	HMDB38683	3	19alpha-19-Hydroxy-311-dioxo-12-ursen-28-oic acid	C29H42O5	M+H	2.2883	0.218157
471.315	223.5	LMST01160009	3	28-nor-3-oxo-11alpha-acetoxy-with-4-enolide	C29H42O5	M+H	2.2883	0.218157
569.313	56	Multiple matches: Expand group.
569.313	56	HMDB01097	3	Protoporphyrinogen IX	C34H40N4O4	M+H	2.23632	-0.215196
569.313	56	HMDB29342	3	Ceanothine E	C34H40N4O4	M+H	2.23632	-0.215196
569.313	56	HMDB34101	3	Adouetine Y	C34H40N4O4	M+H	2.23632	-0.215196
569.313	56	LMPR0106080005	3	(4alpha6beta8alpha9beta13alpha14beta16beta17beta)-616- bis(acetyloxy)-37-dioxo-29-nordammara-117(20)24-trien-21-oic acid	C33H44O8	M+H	2.23632	-0.215196
200.201	579.2	LMFA08010001	3	dodecanamide	C12H25NO	M+H	2.20116	-0.213172
541.369	121.1	Multiple matches: Expand group.
541.369	121.1	LMGP03060001	3	1-eicosyl-glycero-3-phosphoserine	C26H54NO8P	M+H_[+1]	2.11515	0.208144
541.369	121.1	LMST03020543	3	(5Z7E)-(1S3R)-2525-diphenyl-2627-dinor-910-seco-5710(19)-cholestatriene-1325-triol	C37H48O3	M+H	2.11515	0.208144
229.143	580	Multiple matches: Expand group.
229.143	580	HMDB30994	3	5-Heptyltetrahydro-2-oxo-3-furancarboxylic acid	C12H20O4	M+H	2.09344	0.206857
229.143	580	HMDB00933	3	Traumatic acid	C12H20O4	M+H	2.09344	0.206857
229.143	580	LMFA02020012	3	(1R2R)-2-(4-hydroxypentyl)-3-oxocyclopentylacetic acid	C12H20O4	M+H	2.09344	0.206857
229.143	580	LMFA01060092	3	912-dioxo-dodecanoic acid	C12H20O4	M+H	2.09344	0.206857
229.143	580	LMFA01170002	3	2E-dodecenedioic acid	C12H20O4	M+H	2.09344	0.206857
229.143	580	LMFA02020015	3	(1R2R)-2-(5-hydroxypentyl)-3-oxocyclopentylacetic acid	C12H20O4	M+H	2.09344	0.206857
229.143	580	LMFA01170033	3	2Z-Dodecenedioic acid	C12H20O4	M+H	2.09344	0.206857
523.348	404.7	HMDB37182	3	Polysorbate 20	C26H50O10	M+H	2.08182	-0.206166
120.065	56.4	Multiple matches: Expand group.
120.065	56.4	HMDB00167	3	L-Threonine	C4H9NO3	M+H	2.07245	-0.205607
120.065	56.4	HMDB00719	3	L-Homoserine	C4H9NO3	M+H	2.07245	-0.205607
120.065	56.4	HMDB61148	3	Hydroxyethyl glycine	C4H9NO3	M+H	2.07245	-0.205607
120.065	56.4	HMDB04041	3	L-Allothreonine	C4H9NO3	M+H	2.07245	-0.205607
220.118	72	Multiple matches: Expand group.
220.118	72	HMDB12204	3	Cis-zeatin	C10H13N5O	M+H	2.01982	0.202439
220.118	72	HMDB00210	3	Pantothenic acid	C9H17NO5	M+H	2.01982	0.202439
265.118	249.3	Multiple matches: Expand group.
265.118	249.3	HMDB61136	3	di-Hydroxymelatonin	C13H16N2O4	M+H	2.01971	0.202433
265.118	249.3	HMDB04259	3	Acetyl-N-formyl-5-methoxykynurenamine	C13H16N2O4	M+H	2.01971	0.202433
265.118	249.3	HMDB06344	3	Alpha-N-Phenylacetyl-L-glutamine	C13H16N2O4	M+H	2.01971	0.202433
247.227	579.5	HMDB34557	3	88-Diethoxy-26-dimethyl-2-octanol	C14H30O3	M+H	1.99418	-0.20088
477.316	302.3	Multiple matches: Expand group.
477.316	302.3	HMDB38496	3	Polyporusterone B	C28H44O6	M+H	1.97799	0.19989
477.316	302.3	HMDB38497	3	Polyporusterone C	C28H44O6	M+H	1.97799	0.19989
477.316	302.3	LMPR0104210004	3	-	C28H44O6	M+H	1.97799	0.19989
157.006	563.7	HMDB01544	3	m-Chlorobenzoic acid	C7H5ClO2	M+H	1.97122	0.199474
241.155	49.7	HMDB15407	3	Pirbuterol	C12H20N2O3	M+H	1.95614	0.198547
293.172	82.3	Multiple matches: Expand group.
293.172	82.3	HMDB34658	3	9-Acetoxyfukinanolide	C17H24O4	M+H	1.94586	-0.197912
293.172	82.3	HMDB35687	3	Acetylvalerenolic acid	C17H24O4	M+H	1.94586	-0.197912
293.172	82.3	HMDB41249	3	6-Hydroxyshogaol	C17H24O4	M+H	1.94586	-0.197912
293.172	82.3	HMDB36693	3	Acetylbalchanolide	C17H24O4	M+H	1.94586	-0.197912
293.172	82.3	HMDB39275	3	6-Gingerdione	C17H24O4	M+H	1.94586	-0.197912
293.172	82.3	HMDB34738	3	Isotrichodermin	C17H24O4	M+H	1.94586	-0.197912
293.172	82.3	HMDB34930	3	(3beta6beta)-Furanoeremophilane-36-diol 6-acetate	C17H24O4	M+H	1.94586	-0.197912
512.335	82.4	Multiple matches: Expand group.
512.335	82.4	LMGP03060002	3	1-octadecyl-glycero-3-phosphoserine	C24H50NO8P	M+H	1.93794	0.197422
512.335	82.4	LMSP01080060	3	-	C31H45NO5	M+H	1.93794	0.197422
429.376	223.4	Multiple matches: Expand group.
429.376	223.4	HMDB59643	3	3-beta-Hydroxy-4-beta-methyl-5-alpha-cholest-7-ene-4-alpha-carbaldehyde	C29H48O2	M+H	1.91235	0.19583
429.376	223.4	HMDB12168	3	4alpha-Formyl-4beta-methyl-5alpha-cholesta-8-en-3beta-ol	C29H48O2	M+H	1.91235	0.19583
429.376	223.4	HMDB34422	3	3-Hydroxystigmast-5-en-7-one	C29H48O2	M+H	1.91235	0.19583
429.376	223.4	HMDB12170	3	4alpha-Hydroxymethyl-4beta-methyl-5alpha-cholesta-824-dien-3beta-ol	C29H48O2	M+H	1.91235	0.19583
429.376	223.4	HMDB36018	3	Mangiferdesmethylursanone	C29H48O2	M+H	1.91235	0.19583
429.376	223.4	HMDB03822	3	Cholesteryl acetate	C29H48O2	M+H	1.91235	0.19583
429.376	223.4	HMDB41112	3	(3alpha5alpha7alpha)-14-Methylergosta-9(11)24(28)-dien-37-diol	C29H48O2	M+H	1.91235	0.19583
429.376	223.4	HMDB39822	3	Stigmastane-36-dione	C29H48O2	M+H	1.91235	0.19583
429.376	223.4	HMDB39498	3	(6beta24R)-6-Hydroxystigmast-4-en-3-one	C29H48O2	M+H	1.91235	0.19583
429.376	223.4	LMST01040256	3	(22R)-22-hydroxystigmast-4-en-3-one	C29H48O2	M+H	1.91235	0.19583
429.376	223.4	LMST01110017	3	(25R)-5alpha6alpha-epoxy-24R26R-dimethyl-2627-cyclo-cholestan-3beta-ol	C29H48O2	M+H	1.91235	0.19583
429.376	223.4	LMST01040196	3	24Z-ethylidene-cholest-5-en-3beta22S-diol	C29H48O2	M+H	1.91235	0.19583
429.376	223.4	LMST01040265	3	14-(5-ethyl-6-methylheptan-2-yl)-215-dimethyltetracyclo87002701115heptadecane-58-dione	C29H48O2	M+H	1.91235	0.19583
429.376	223.4	LMST03040004	3	(5Z7E)-(1S3R)-910-seco-5710(19)-poriferastatrien-13-diol	C29H48O2	M+H	1.91235	0.19583
429.376	223.4	LMST03020673	3	(5Z7E)-(3S)-619-ethano-910-seco-5(10)7-cholestadiene-325-diol	C29H48O2	M+H	1.91235	0.19583
429.376	223.4	LMST01040168	3	24S28S-epoxystigmast-5-en-3beta-ol	C29H48O2	M+H	1.91235	0.19583
429.376	223.4	LMST01040167	3	24-vinyl-cholest-5-ene-3beta24-diol	C29H48O2	M+H	1.91235	0.19583
429.376	223.4	LMST01040257	3	(3beta22R)-stigmasta-46-diene-322-diol	C29H48O2	M+H	1.91235	0.19583
429.376	223.4	LMST01040243	3	14-(5-ethyl-6-methylheptan-2-yl)-5-hydroxy-215-dimethyltetracyclo87002701115heptadec-7-en-9-one	C29H48O2	M+H	1.91235	0.19583
429.376	223.4	LMST03020415	3	(5Z7E)-(1S3R)-2627-dimethyl-910-seco-5710(19)-cholestatriene-13-diol	C29H48O2	M+H	1.91235	0.19583
429.376	223.4	LMST01040169	3	3beta-hydroxy-stigmast-5-en-7-one	C29H48O2	M+H	1.91235	0.19583
429.376	223.4	LMST01010245	3	3beta-acetoxycholest-5-ene	C29H48O2	M+H	1.91235	0.19583
429.376	223.4	LMST03020417	3	(7E)-(3S6S)-619-ethano-910-seco-5(10)7-cholestadiene-325-diol	C29H48O2	M+H	1.91235	0.19583
429.376	223.4	LMST01040151	3	24R28R-epoxystigmast-5-en-3beta-ol	C29H48O2	M+H	1.91235	0.19583
429.376	223.4	LMST01040260	3	(3beta22E)-stigmasta-522-diene-320-diol	C29H48O2	M+H	1.91235	0.19583
429.376	223.4	LMST03020416	3	(5Z7E)-(3S)-2627-dimethyl-910-seco-5710(19)-cholestatriene-325-diol	C29H48O2	M+H	1.91235	0.19583
429.376	223.4	LMST01010230	3	4alpha-formyl-4beta-methyl-5alpha-cholesta-8-en-3beta-ol	C29H48O2	M+H	1.91235	0.19583
429.376	223.4	LMST03020418	3	(7E)-(3S6R)-619-ethano-910-seco-5(10)7-cholestadiene-325-diol	C29H48O2	M+H	1.91235	0.19583
429.376	223.4	LMST01010232	3	4alpha-hydroxymethyl-4beta-methyl-5alpha-cholesta-824-dien-3beta-ol	C29H48O2	M+H	1.91235	0.19583
429.376	223.4	LMST01010204	3	3beta-hydroxy-4beta-methyl-5alpha-cholest-7-ene-4alpha-carbaldehyde	C29H48O2	M+H	1.91235	0.19583
150.091	578.3	Multiple matches: Expand group.
150.091	578.3	HMDB40051	3	5-Acetyl-23-dihydro-1H-pyrrolizine	C9H11NO	M+H	1.90114	0.19513
150.091	578.3	HMDB40047	3	23-Dihydro-6-methyl-1H-pyrrolizine-5-carboxaldehyde	C9H11NO	M+H	1.90114	0.19513
150.091	578.3	HMDB39662	3	2367-Tetrahydrocyclopentbazepin-8(1H)-one	C9H11NO	M+H	1.90114	0.19513
150.091	578.3	HMDB40016	3	2-(2-Furanyl)-3456-tetrahydropyridine	C9H11NO	M+H	1.90114	0.19513
150.091	578.3	HMDB40029	3	23-Dihydro-5-methyl-1H-pyrrolizine-7-carboxaldehyde	C9H11NO	M+H	1.90114	0.19513
150.091	578.3	HMDB40043	3	3-(2-Furanylmethylene)pyrrolidine	C9H11NO	M+H	1.90114	0.19513
150.091	578.3	HMDB30175	3	Venoterpine	C9H11NO	M+H	1.90114	0.19513
150.091	578.3	HMDB40050	3	34-Dihydro-5-(5-methyl-2-furanyl)-2H-pyrrole	C9H11NO	M+H	1.90114	0.19513
499.348	517.5	Multiple matches: Expand group.
499.348	517.5	HMDB10382	3	LysoPC(16:0)	C24H50NO7P	M+H_[+3]	1.90101	0.195121
499.348	517.5	LMGP01050113	3	1-hexadecanoyl-sn-glycero-3-phosphocholine	C24H50NO7P	M+H_[+3]	1.90101	0.195121
499.348	517.5	LMGP01050018	3	1-hexadecanoyl-sn-glycero-3-phosphocholine	C24H50NO7P	M+H_[+3]	1.90101	0.195121
499.348	517.5	LMGP01020019	3	1-tetradecyl-2-acetyl-sn-glycero-3-phosphocholine	C24H50NO7P	M+H_[+3]	1.90101	0.195121
499.348	517.5	LMGP01050074	3	2-hexadecanoyl-sn-glycero-3-phosphocholine	C24H50NO7P	M+H_[+3]	1.90101	0.195121
499.348	517.5	LMGP02050028	3	1-nonadecanoyl-glycero-3-phosphoethanolamine	C24H50NO7P	M+H_[+3]	1.90101	0.195121
398.327	76	Multiple matches: Expand group.
398.327	76	HMDB13207	3	9-Hexadecenoylcarnitine	C23H43NO4	M+H	1.89188	0.194549
398.327	76	HMDB06317	3	trans-Hexadec-2-enoyl carnitine	C23H43NO4	M+H	1.89188	0.194549
398.327	76	LMFA07070097	3	3-(9Z)-hexadec-9-enoyloxy-4-(trimethylazaniumyl)butanoate	C23H43NO4	M+H	1.89188	0.194549
398.327	76	LMFA07070109	3	3-(2E)-hexadec-2-enoyloxy-4-(trimethylazaniumyl)butanoate	C23H43NO4	M+H	1.89188	0.194549
693.445	79.3	Multiple matches: Expand group.
693.445	79.3	HMDB31093	3	91215-Octadecatrienoic acid 1-(phosphonoxy)methyl-12-ethanediyl ester	C39H65O8P	M+H	1.8917	-0.194537
693.445	79.3	LMGP10010351	3	1-(9Z12Z-octadecadienoyl)-2-(6Z9Z12Z15Z-octadecatetraenoyl)-glycero-3-phosphate	C39H65O8P	M+H	1.8917	-0.194537
693.445	79.3	LMGP10010379	3	1-(6Z9Z12Z-octadecatrienoyl)-2-(9Z12Z15Z-octadecatrienoyl)-glycero-3-phosphate	C39H65O8P	M+H	1.8917	-0.194537
693.445	79.3	LMGP10010654	3	1-(5Z8Z11Z14Z17Z-eicosapentaenoyl)-2-(9Z-hexadecenoyl)-glycero-3-phosphate	C39H65O8P	M+H	1.8917	-0.194537
693.445	79.3	LMGP10010436	3	1-(6Z9Z12Z15Z-octadecatetraenoyl)-2-(9Z12Z-octadecadienoyl)-glycero-3-phosphate	C39H65O8P	M+H	1.8917	-0.194537
693.445	79.3	LMGP10010378	3	12-di-(6Z9Z12Z-octadecatrienoyl)-sn-glycero-3-phosphate	C39H65O8P	M+H	1.8917	-0.194537
693.445	79.3	LMGP10010922	3	1-tetradecanoyl-2-(4Z7Z10Z13Z16Z19Z-docosahexaenoyl)-glycero-3-phosphate	C39H65O8P	M+H	1.8917	-0.194537
693.445	79.3	LMGP10010218	3	1-(9Z-hexadecenoyl)-2-(5Z8Z11Z14Z17Z-eicosapentaenoyl)-glycero-3-phosphate	C39H65O8P	M+H	1.8917	-0.194537
693.445	79.3	LMGP10010407	3	1-(9Z12Z15Z-octadecatrienoyl)-2-(6Z9Z12Z-octadecatrienoyl)-glycero-3-phosphate	C39H65O8P	M+H	1.8917	-0.194537
693.445	79.3	LMGP10010818	3	1-(4Z7Z10Z13Z16Z19Z-docosahexaenoyl)-2-tetradecanoyl-glycero-3-phosphate	C39H65O8P	M+H	1.8917	-0.194537
693.445	79.3	LMGP10010016	3	12-di-(9Z12Z15Z-octadecatrienoyl)-sn-glycero-3-phosphate	C39H65O8P	M+H	1.8917	-0.194537
987.78	43.1	Multiple matches: Expand group.
987.78	43.1	LMSL03000014	3	2-O-octadecanoyl-3-O-(2S4S-dimethyl-tetracosanoyl)-alphaalpha-trehalose	C56H106O13	M+H	1.88759	0.194279
987.78	43.1	LMSL03000020	3	2-O-nonadecanoyl-3-O-(2S4S-dimethyl-tricosanoyl)-alphaalpha-trehalose	C56H106O13	M+H	1.88759	0.194279
104.053	54.8	HMDB31682	3	()-2-Methylthiazolidine	C4H9NS	M+H	1.88406	-0.194057
584.258	379.9	HMDB01008	3	Biliverdin	C33H34N4O6	M+H_[+1]	1.85458	0.192194
451.301	221.8	Multiple matches: Expand group.
451.301	221.8	LMST03020072	3	(5Z7E)-(3S)-24-(dimethoxyphosphoryl)-910-seco-5710(19)-cholatrien-3-ol	C26H43O4P	M+H	1.83715	0.191086
451.301	221.8	LMST03020196	3	(5Z7E)-(1S2S3R)-2-chloro-910-seco-5710(19)-cholestatriene-1325-triol	C27H43ClO3	M+H	1.83715	0.191086
451.301	221.8	LMST03020601	3	(5Z7E)-(1R2R3R)-2-chloro-910-seco-5710(19)-cholestatriene-1325-triol	C27H43ClO3	M+H	1.83715	0.191086
436.299	531.9	Multiple matches: Expand group.
436.299	531.9	HMDB37183	3	Polysorbate 60	C22H42O8	M+H_[+1]	1.83449	-0.190916
436.299	531.9	LMST03020051	3	(5Z7E)-(1R3R)-125-dihydroxy-910-seco-3-thia-5710(19)-cholestatriene 3-oxide	C26H42O3S	M+H_[+1]	1.83449	-0.190916
436.299	531.9	LMST03020054	3	(5Z7E)-(1S3R20R)-910-seco-22-thia-5710(19)-cholestatriene-1325-triol	C26H42O3S	M+H_[+1]	1.83449	-0.190916
436.299	531.9	LMST03020049	3	(5E7E)-(1R3R)-125-dihydroxy-910-seco-3-thia-5710(19)-cholestatriene 3-oxide	C26H42O3S	M+H_[+1]	1.83449	-0.190916
436.299	531.9	LMST03020052	3	(5Z7E)-(1R3S)-125-dihydroxy-910-seco-3-thia-5710(19)-cholestatrien 3-oxide	C26H42O3S	M+H_[+1]	1.83449	-0.190916
436.299	531.9	LMST03020053	3	(5Z7E)-(1S3R)-910-seco-22-thia-5710(19)-cholestatriene-1325-triol	C26H42O3S	M+H_[+1]	1.83449	-0.190916
436.299	531.9	LMST03020055	3	(5Z7E)-(1S3R)-910-seco-23-thia-5710(19)-cholestatriene-1325-triol	C26H42O3S	M+H_[+1]	1.83449	-0.190916
436.299	531.9	LMST03020050	3	(5E7E)-(1R3S)-125-dihydroxy-910-seco-3-thia-5710(19)-cholestatriene 3-oxide	C26H42O3S	M+H_[+1]	1.83449	-0.190916
989.742	44	Multiple matches: Expand group.
989.742	44	LMSL03000003	3	2-O-hexadecanoyl-3-O-(2S4S6S-trimethyl-3S-hydroxy-tetracosanoyl)-alphaalpha-trehalose	C55H104O14	M+H	1.83415	-0.190894
989.742	44	LMSL03000015	3	2-O-nonadecanoyl-3-O-(2S4S6S-trimethyl-3S-hydroxy-henicosanoyl)-alphaalpha-trehalose	C55H104O14	M+H	1.83415	-0.190894
330.227	583.6	Multiple matches: Expand group.
330.227	583.6	HMDB13202	3	6-Keto-decanoylcarnitine	C17H31NO5	M+H	1.8281	-0.190508
330.227	583.6	LMFA07070047	3	3-(6-oxodecanoyl)oxy-4-(trimethylazaniumyl)butanoate	C17H31NO5	M+H	1.8281	-0.190508
233.071	60.5	HMDB34291	3	Sampangine	C15H8N2O	M+H	1.82428	0.190263
239.2	579.1	Multiple matches: Expand group.
239.2	579.1	HMDB40273	3	Terpenyl isovalerate	C15H26O2	M+H	1.82006	-0.189993
239.2	579.1	HMDB36880	3	169-Farnesatriene-311-diol	C15H26O2	M+H	1.82006	-0.189993
239.2	579.1	HMDB36032	3	3beta-7-Drimene-311-diol	C15H26O2	M+H	1.82006	-0.189993
239.2	579.1	HMDB29350	3	Geranyl 3-methylbutanoate	C15H26O2	M+H	1.82006	-0.189993
239.2	579.1	HMDB41589	3	alpha-Kessyl alcohol	C15H26O2	M+H	1.82006	-0.189993
239.2	579.1	HMDB32054	3	alpha-Terpinyl pentanoate	C15H26O2	M+H	1.82006	-0.189993
239.2	579.1	HMDB38136	3	Curcumadiol	C15H26O2	M+H	1.82006	-0.189993
239.2	579.1	HMDB38138	3	alpha-Bisabolol oxide C	C15H26O2	M+H	1.82006	-0.189993
239.2	579.1	HMDB38196	3	alpha-Bisabolol oxide A	C15H26O2	M+H	1.82006	-0.189993
239.2	579.1	HMDB31384	3	beta-Kessyl alcohol	C15H26O2	M+H	1.82006	-0.189993
239.2	579.1	HMDB30428	3	Linalyl isovalerate	C15H26O2	M+H	1.82006	-0.189993
239.2	579.1	HMDB39130	3	Methyl (ZZ)-58-tetradecadienoate	C15H26O2	M+H	1.82006	-0.189993
239.2	579.1	HMDB38250	3	Isobornyl isovalerate	C15H26O2	M+H	1.82006	-0.189993
239.2	579.1	HMDB35287	3	Daucol	C15H26O2	M+H	1.82006	-0.189993
239.2	579.1	HMDB34673	3	Calamendiol	C15H26O2	M+H	1.82006	-0.189993
239.2	579.1	HMDB37279	3	210-Bisaboladiene-14-diol	C15H26O2	M+H	1.82006	-0.189993
239.2	579.1	HMDB36730	3	Tricyclohumuladiol	C15H26O2	M+H	1.82006	-0.189993
239.2	579.1	HMDB40281	3	Geranyl valerate	C15H26O2	M+H	1.82006	-0.189993
239.2	579.1	HMDB37284	3	5(1-10)-Abeo-112-patchoulanediol	C15H26O2	M+H	1.82006	-0.189993
239.2	579.1	HMDB38248	3	Bornyl isovalerate	C15H26O2	M+H	1.82006	-0.189993
239.2	579.1	HMDB37195	3	2-Propenyl cyclohexanehexanoate	C15H26O2	M+H	1.82006	-0.189993
239.2	579.1	HMDB33228	3	Guaidiol	C15H26O2	M+H	1.82006	-0.189993
239.2	579.1	HMDB38247	3	Bornyl valerate	C15H26O2	M+H	1.82006	-0.189993
239.2	579.1	HMDB32291	3	Geranyl 2-methylbutyrate	C15H26O2	M+H	1.82006	-0.189993
239.2	579.1	HMDB35887	3	Germacrenone	C15H26O2	M+H	1.82006	-0.189993
239.2	579.1	HMDB32343	3	Isobornyl 2-methylbutyrate	C15H26O2	M+H	1.82006	-0.189993
239.2	579.1	HMDB32209	3	Citronellyl trans-2-methyl-2-butenoate	C15H26O2	M+H	1.82006	-0.189993
239.2	579.1	HMDB39745	3	(2E6E9xi)-Farnesol	C15H26O2	M+H	1.82006	-0.189993
239.2	579.1	HMDB31383	3	(3S4S6R7S)-110-Bisaboladiene-34-diol	C15H26O2	M+H	1.82006	-0.189993
239.2	579.1	HMDB38197	3	alpha-Bisabolol oxide B	C15H26O2	M+H	1.82006	-0.189993
239.2	579.1	LMFA07010617	3	(E)-37-Dimethyl-26-octadienyl pentanoate	C15H26O2	M+H	1.82006	-0.189993
239.2	579.1	LMFA07010277	3	5Z9E-Tridecadienyl acetate	C15H26O2	M+H	1.82006	-0.189993
239.2	579.1	LMFA01030582	3	14-pentadecynoic acid	C15H26O2	M+H	1.82006	-0.189993
239.2	579.1	LMPR0103710001	3	-	C15H26O2	M+H	1.82006	-0.189993
239.2	579.1	LMFA07010615	3	(E)-37-Dimethyl-26-octadienyl 3-methylbutanoate	C15H26O2	M+H	1.82006	-0.189993
239.2	579.1	LMFA07010526	3	Methyl (E)-2610-trimethyl-59-undecadienoate	C15H26O2	M+H	1.82006	-0.189993
239.2	579.1	LMPR0103530001	3	-	C15H26O2	M+H	1.82006	-0.189993
239.2	579.1	LMFA07010744	3	prop-2-en-1-yl 6-cyclohexylhexanoate	C15H26O2	M+H	1.82006	-0.189993
239.2	579.1	LMFA07010269	3	4E7Z-Tridecadienyl acetate	C15H26O2	M+H	1.82006	-0.189993
239.2	579.1	LMFA01030790	3	3S711-Trimethyl-610-dodecadienoic acid	C15H26O2	M+H	1.82006	-0.189993
239.2	579.1	LMFA01030581	3	3-pentadecynoic acid	C15H26O2	M+H	1.82006	-0.189993
239.2	579.1	LMFA07010270	3	5E9Z-Tridecadienyl acetate	C15H26O2	M+H	1.82006	-0.189993
239.2	579.1	LMFA07010899	3	(2Z)-37-dimethylocta-26-dien-1-yl pentanoate	C15H26O2	M+H	1.82006	-0.189993
239.2	579.1	LMFA07010279	3	7Z11Z-Tridecadienyl acetate	C15H26O2	M+H	1.82006	-0.189993
239.2	579.1	LMFA07010625	3	(Z)-37-Dimethyl-26-octadienyl 3-methylbutanoate	C15H26O2	M+H	1.82006	-0.189993
239.2	579.1	LMFA07010278	3	5Z9Z-Tridecadienyl acetate	C15H26O2	M+H	1.82006	-0.189993
239.2	579.1	LMFA07010821	3	37-dimethyloct-6-en-1-yl (2E)-2-methylbut-2-enoate	C15H26O2	M+H	1.82006	-0.189993
239.2	579.1	LMFA07010554	3	(EE)-810-Tetradecadienyl formate	C15H26O2	M+H	1.82006	-0.189993
239.2	579.1	LMFA07010631	3	(Z)-3-Nonenyl (E)-2-hexenoate	C15H26O2	M+H	1.82006	-0.189993
239.2	579.1	LMFA07010894	3	(2E)-37-dimethylocta-26-dien-1-yl 2-methylbutanoate	C15H26O2	M+H	1.82006	-0.189993
239.2	579.1	LMFA07010538	3	(ZE)-57-Dodecadienyl propionate	C15H26O2	M+H	1.82006	-0.189993
239.2	579.1	LMPR0103800001	3	-	C15H26O2	M+H	1.82006	-0.189993
360.194	62.1	HMDB60615	3	Norendoxifen	C24H25NO2	M+H	1.8182	-0.189874
161.06	22.3	Multiple matches: Expand group.
161.06	22.3	HMDB60497	3	Naphthalene-12-diol	C10H8O2	M+H	1.80769	0.189198
161.06	22.3	HMDB32394	3	6-Methylcoumarin	C10H8O2	M+H	1.80769	0.189198
161.06	22.3	HMDB41009	3	7-Methyl-2-benzofurancarboxaldehyde	C10H8O2	M+H	1.80769	0.189198
161.06	22.3	HMDB36073	3	Viburtinal	C10H8O2	M+H	1.80769	0.189198
358.295	62.1	LMFA08020107	3	N-hexadecanoyl-threonine	C20H39NO4	M+H	1.80286	0.188888
215.127	550.1	Multiple matches: Expand group.
215.127	550.1	HMDB30986	3	2-Carboxy-57-dimethyl-4-octanolide	C11H18O4	M+H	1.79214	0.188196
215.127	550.1	HMDB30984	3	5-Hexyltetrahydro-2-oxo-3-furancarboxylic acid	C11H18O4	M+H	1.79214	0.188196
215.127	550.1	HMDB30985	3	alpha-Carboxy-delta-decalactone	C11H18O4	M+H	1.79214	0.188196
145.069	13.6	HMDB31698	3	S-(3-Methyl-2-butenyl) ethanethioate	C7H12OS	M+H	1.7902	-0.188071
235.169	566.7	Multiple matches: Expand group.
235.169	566.7	HMDB37739	3	7-(13-Cyclohexadienyl)-5-hydroxy-26-dimethyl-2-hepten-4-one	C15H22O2	M+H	1.78302	0.187605
235.169	566.7	HMDB36449	3	(1alpha4beta5beta)-4-Hydroxy-7(11)10(14)-guaiadien-8-one	C15H22O2	M+H	1.78302	0.187605
235.169	566.7	HMDB34742	3	Saussurea lactone	C15H22O2	M+H	1.78302	0.187605
235.169	566.7	HMDB36466	3	Zerumbone oxide	C15H22O2	M+H	1.78302	0.187605
235.169	566.7	HMDB35202	3	7-Hydroxycostal	C15H22O2	M+H	1.78302	0.187605
235.169	566.7	HMDB38796	3	27(14)-Illudadiene-1015-diol	C15H22O2	M+H	1.78302	0.187605
235.169	566.7	HMDB36427	3	Procurcumenol	C15H22O2	M+H	1.78302	0.187605
235.169	566.7	HMDB34562	3	9-Pentadecene-1214-diyne-111-diol	C15H22O2	M+H	1.78302	0.187605
235.169	566.7	HMDB35407	3	Dehydrocurdione	C15H22O2	M+H	1.78302	0.187605
235.169	566.7	HMDB38795	3	79-Illudadiene-314-diol	C15H22O2	M+H	1.78302	0.187605
235.169	566.7	HMDB35639	3	Petasalbin	C15H22O2	M+H	1.78302	0.187605
235.169	566.7	HMDB37038	3	Cyclodehydroisolubimin	C15H22O2	M+H	1.78302	0.187605
235.169	566.7	HMDB36647	3	Isocurcumenol	C15H22O2	M+H	1.78302	0.187605
235.169	566.7	HMDB37640	3	2-Methyl-4-phenyl-2-butyl 2-methylpropanoate	C15H22O2	M+H	1.78302	0.187605
235.169	566.7	HMDB31349	3	Epiacoronene	C15H22O2	M+H	1.78302	0.187605
235.169	566.7	HMDB35408	3	110-Epoxygermacrone	C15H22O2	M+H	1.78302	0.187605
235.169	566.7	HMDB33960	3	Curcumenol	C15H22O2	M+H	1.78302	0.187605
235.169	566.7	HMDB38914	3	46-Decadiyn-1-ol isovalerate	C15H22O2	M+H	1.78302	0.187605
235.169	566.7	HMDB34956	3	Oxysolavetivone	C15H22O2	M+H	1.78302	0.187605
235.169	566.7	HMDB38698	3	xi-2-Hydroxy-135-bisabolatrien-9-one	C15H22O2	M+H	1.78302	0.187605
235.169	566.7	HMDB35935	3	Dihydroisoalantolactone	C15H22O2	M+H	1.78302	0.187605
235.169	566.7	HMDB35889	3	Germacrone 45-epoxide	C15H22O2	M+H	1.78302	0.187605
235.169	566.7	HMDB36390	3	3-Phenylpropyl hexanoate	C15H22O2	M+H	1.78302	0.187605
235.169	566.7	HMDB36392	3	(Z)-alpha-Bergamotenoic acid	C15H22O2	M+H	1.78302	0.187605
235.169	566.7	HMDB37391	3	p-Hydroxynonanophenone	C15H22O2	M+H	1.78302	0.187605
235.169	566.7	HMDB35794	3	beta-Costic acid	C15H22O2	M+H	1.78302	0.187605
235.169	566.7	HMDB37710	3	4-Methylphenyl octanoate	C15H22O2	M+H	1.78302	0.187605
235.169	566.7	HMDB32081	3	410-Longipinanedione	C15H22O2	M+H	1.78302	0.187605
235.169	566.7	HMDB38190	3	Rishitinol	C15H22O2	M+H	1.78302	0.187605
235.169	566.7	HMDB35413	3	(4alpha5alpha)-11-Eremophilene-29-dione	C15H22O2	M+H	1.78302	0.187605
235.169	566.7	HMDB39621	3	beta-Santalic acid	C15H22O2	M+H	1.78302	0.187605
235.169	566.7	HMDB30016	3	Valerenic acid	C15H22O2	M+H	1.78302	0.187605
235.169	566.7	HMDB35869	3	alpha-Rotunol	C15H22O2	M+H	1.78302	0.187605
235.169	566.7	HMDB41036	3	Sugeonol	C15H22O2	M+H	1.78302	0.187605
235.169	566.7	HMDB33252	3	Curcumanolide A	C15H22O2	M+H	1.78302	0.187605
235.169	566.7	HMDB38198	3	37-Bisaboladiene-28-dione	C15H22O2	M+H	1.78302	0.187605
235.169	566.7	HMDB33253	3	Curcumenone	C15H22O2	M+H	1.78302	0.187605
235.169	566.7	HMDB36035	3	Marasmene	C15H22O2	M+H	1.78302	0.187605
235.169	566.7	LMPR0103610001	3	-	C15H22O2	M+H	1.78302	0.187605
235.169	566.7	LMPR0103460001	3	-	C15H22O2	M+H	1.78302	0.187605
235.169	566.7	LMPR0103610002	3	-	C15H22O2	M+H	1.78302	0.187605
235.169	566.7	LMPR0103160001	3	-	C15H22O2	M+H	1.78302	0.187605
235.169	566.7	LMPR0103890004	3	1-deoxypentalenic acid	C15H22O2	M+H	1.78302	0.187605
235.169	566.7	LMPR0103260001	3	-	C15H22O2	M+H	1.78302	0.187605
235.169	566.7	LMPR0103400001	3	-	C15H22O2	M+H	1.78302	0.187605
235.169	566.7	LMPR0103190015	3	2-(1R4R4aS8aR)-47-dimethyl-12344a568a-octahydronaphthalen-1-ylprop-2-enoic acid	C15H22O2	M+H	1.78302	0.187605
235.169	566.7	LMPR0103490002	3	-	C15H22O2	M+H	1.78302	0.187605
235.169	566.7	LMFA07010766	3	deca-46-diyn-1-yl 3-methylbutanoate	C15H22O2	M+H	1.78302	0.187605
235.169	566.7	LMPR0103320001	3	-	C15H22O2	M+H	1.78302	0.187605
235.169	566.7	LMPR0103390001	3	-	C15H22O2	M+H	1.78302	0.187605
235.169	566.7	LMPR0103450003	3	8S-hydroxy-14R99-tetramethyl-345678-hexahydro-3a(R)7-methanoazulen-2-one	C15H22O2	M+H	1.78302	0.187605
188.071	55.4	Multiple matches: Expand group.
188.071	55.4	HMDB33249	3	6-Chloro-N-(1-methylethyl)-135-triazine-24-diamine	C6H10ClN5	M+H	1.77973	-0.187393
188.071	55.4	HMDB00734	3	Indoleacrylic acid	C11H9NO2	M+H	1.77973	-0.187393
101.115	522.6	Multiple matches: Expand group.
101.115	522.6	HMDB31404	3	Cyclohexylamine	C6H13N	M+H_[+1]	1.77672	0.187197
101.115	522.6	HMDB32416	3	2-Methylpiperidine	C6H13N	M+H_[+1]	1.77672	0.187197
219.196	582.6	HMDB40219	3	88-Dimethoxy-26-dimethyl-2-octanol	C12H26O3	M+H	1.77165	0.186868
467.32	328.2	Multiple matches: Expand group.
467.32	328.2	HMDB00653	3	Cholesterol sulfate	C27H46O4S	M+H	1.77041	-0.186787
467.32	328.2	HMDB32596	3	Sodium glycocholate	C26H43NO6	M+H_[+1]	1.77041	-0.186787
467.32	328.2	HMDB00331	3	3a7b12a-Trihydroxyoxocholanyl-Glycine	C26H43NO6	M+H_[+1]	1.77041	-0.186787
467.32	328.2	HMDB00138	3	Glycocholic acid	C26H43NO6	M+H_[+1]	1.77041	-0.186787
467.32	328.2	LMST05030001	3	N-(3alpha7alpha12alpha-trihydroxy-5beta-cholan-24-oyl)-glycine	C26H43NO6	M+H_[+1]	1.77041	-0.186787
467.32	328.2	LMST05030007	3	-	C26H43NO6	M+H_[+1]	1.77041	-0.186787
467.32	328.2	LMST05020016	3	cholest-5-en-3beta-yl hydrogen sulfate	C27H46O4S	M+H	1.77041	-0.186787
614.233	396.6	HMDB40767	3	Neoacrimarine E	C35H35NO9	M+H	1.76897	0.186693
478.328	521.3	Multiple matches: Expand group.
478.328	521.3	HMDB14936	3	Gentamicin	C21H43N5O7	M+H	1.76249	0.186271
478.328	521.3	LMGP02070003	3	1-(1Z12Z-nonadecadienyl)-sn-glycero-3-phosphoethanolamine	C24H48NO6P	M+H	1.76249	0.186271
412.285	341.7	HMDB15648	3	Fesoterodine	C26H37NO3	M+H	1.7494	-0.185416
338.277	567.8	Multiple matches: Expand group.
338.277	567.8	HMDB06070	3	Pregnanetriol	C21H36O3	M+H_[+1]	1.73264	0.184316
338.277	567.8	HMDB38105	3	Isolinderanolide	C21H36O3	M+H_[+1]	1.73264	0.184316
338.277	567.8	HMDB31005	3	3-Methyl-5-pentyl-2-furanundecanoic acid	C21H36O3	M+H_[+1]	1.73264	0.184316
418.153	520.9	HMDB60633	3	N-Acetyl gemifloxacin	C19H20FN5O5	M+H	1.7315	0.184241
609.347	59.8	HMDB41368	3	24-Acetyl- 25-cinnamoylvulgaroside	C36H48O8	M+H	1.70987	-0.182812
1124.17	46.2	LMFA01160003	3	2-docosyl-3-hydroxy-pentapentaconta-21E36Z-dienoic acid	C77H150O3	M+H	1.70292	0.182352
151.062	57.2	Multiple matches: Expand group.
151.062	57.2	HMDB31709	3	16-Hexanedithiol	C6H14S2	M+H	1.6947	-0.181805
151.062	57.2	HMDB00098	3	D-Xylose	C5H10O5	M+H	1.6947	-0.181805
151.062	57.2	HMDB03162	3	7-Methylhypoxanthine	C6H6N4O	M+H	1.6947	-0.181805
151.062	57.2	HMDB00366	3	2-Deoxyribonic acid	C5H10O5	M+H	1.6947	-0.181805
151.062	57.2	HMDB00283	3	D-Ribose	C5H10O5	M+H	1.6947	-0.181805
151.062	57.2	HMDB60279	3	Aminochrome o-semiquinone	C8H8NO2	M+H	1.6947	-0.181805
151.062	57.2	HMDB13141	3	1-Methylhypoxanthine	C6H6N4O	M+H	1.6947	-0.181805
151.062	57.2	HMDB29941	3	D-Apiose	C5H10O5	M+H	1.6947	-0.181805
151.062	57.2	HMDB33951	3	Racemethionine	C5H11NO2S	M+H_[+1]	1.6947	-0.181805
151.062	57.2	HMDB32180	3	Butyl ethyl disulfide	C6H14S2	M+H	1.6947	-0.181805
151.062	57.2	HMDB32408	3	Methyl isopentyl disulfide	C6H14S2	M+H	1.6947	-0.181805
151.062	57.2	HMDB12325	3	Arabinofuranose	C5H10O5	M+H	1.6947	-0.181805
151.062	57.2	HMDB29942	3	Arabinose	C5H10O5	M+H	1.6947	-0.181805
151.062	57.2	HMDB00646	3	L-Arabinose	C5H10O5	M+H	1.6947	-0.181805
151.062	57.2	HMDB29578	3	Diisopropyl disulfide	C6H14S2	M+H	1.6947	-0.181805
151.062	57.2	HMDB03371	3	L-Ribulose	C5H10O5	M+H	1.6947	-0.181805
151.062	57.2	HMDB31472	3	Dipropyl disulfide	C6H14S2	M+H	1.6947	-0.181805
151.062	57.2	HMDB40056	3	xi-1-(Propylthio)-1-propanethiol	C6H14S2	M+H	1.6947	-0.181805
151.062	57.2	HMDB59753	3	2-Deoxypentonic acid	C5H10O5	M+H	1.6947	-0.181805
151.062	57.2	HMDB12194	3	Beta-D-ribopyranose	C5H10O5	M+H	1.6947	-0.181805
151.062	57.2	HMDB01644	3	D-Xylulose	C5H10O5	M+H	1.6947	-0.181805
151.062	57.2	HMDB60254	3	Aldehydo-D-xylose	C5H10O5	M+H	1.6947	-0.181805
151.062	57.2	HMDB00696	3	L-Methionine	C5H11NO2S	M+H_[+1]	1.6947	-0.181805
151.062	57.2	HMDB00621	3	D-Ribulose	C5H10O5	M+H	1.6947	-0.181805
151.062	57.2	HMDB14997	3	Penicillamine	C5H11NO2S	M+H_[+1]	1.6947	-0.181805
151.062	57.2	HMDB00751	3	L-Threo-2-pentulose	C5H10O5	M+H	1.6947	-0.181805
151.062	57.2	HMDB31161	3	Methyl pentyl disulfide	C6H14S2	M+H	1.6947	-0.181805
151.062	57.2	LMFA01050386	3	235-trihydroxy-pentanoic acid	C5H10O5	M+H	1.6947	-0.181805
151.062	57.2	LMFA01050477	3	(3S4R)-345-trihydroxypentanoic acid	C5H10O5	M+H	1.6947	-0.181805
163.112	575.8	Multiple matches: Expand group.
163.112	575.8	HMDB31856	3	()-2-Methyl-3-(4-methylphenyl)propanal	C11H14O	M+H	1.68688	-0.181283
163.112	575.8	HMDB31208	3	1-Phenyl-1-pentanone	C11H14O	M+H	1.68688	-0.181283
163.112	575.8	HMDB32415	3	2-Methyl-4-phenylbutyraldehyde	C11H14O	M+H	1.68688	-0.181283
163.112	575.8	HMDB33562	3	3-Methyl-2-phenylbutanal	C11H14O	M+H	1.68688	-0.181283
163.112	575.8	HMDB39803	3	44alpha56-Tetrahydro-7-methyl-2(3H)-naphthalenone	C11H14O	M+H	1.68688	-0.181283
163.112	575.8	HMDB32025	3	4-Isopropylacetophenone	C11H14O	M+H	1.68688	-0.181283
163.112	575.8	HMDB41493	3	4-Isopropylphenylacetaldehyde	C11H14O	M+H	1.68688	-0.181283
163.112	575.8	HMDB40245	3	()-2-Methyl-3-(2-methylphenyl)propanal	C11H14O	M+H	1.68688	-0.181283
163.112	575.8	HMDB36183	3	4-(4-Methylphenyl)-2-butanone	C11H14O	M+H	1.68688	-0.181283
163.112	575.8	LMFA06000070	3	410-undecadiynal	C11H14O	M+H	1.68688	-0.181283
426.358	110.9	Multiple matches: Expand group.
426.358	110.9	HMDB06351	3	Vaccenyl carnitine	C25H47NO4	M+H	1.679	0.180757
426.358	110.9	HMDB05065	3	Oleoylcarnitine	C25H47NO4	M+H	1.679	0.180757
426.358	110.9	HMDB13338	3	11Z-Octadecenylcarnitine	C25H47NO4	M+H	1.679	0.180757
426.358	110.9	HMDB06464	3	Elaidic carnitine	C25H47NO4	M+H	1.679	0.180757
426.358	110.9	LMFA07070063	3	3-(9E)-octadec-9-enoyloxy-4-(trimethylazaniumyl)butanoate	C25H47NO4	M+H	1.679	0.180757
426.358	110.9	LMFA07070096	3	3-(9Z)-octadec-9-enoyloxy-4-(trimethylazaniumyl)butanoate	C25H47NO4	M+H	1.679	0.180757
538.35	97.6	Multiple matches: Expand group.
538.35	97.6	LMGP01011270	3	12-dinonanoyl-sn-glycero-3-phosphocholine	C26H52NO8P	M+H	1.6676	0.179993
538.35	97.6	LMGP01010989	3	1-acetyl-2-hexadecanoyl-sn-glycero-3-phosphocholine	C26H52NO8P	M+H	1.6676	0.179993
538.35	97.6	LMGP03070001	3	1-(1Z-eicosenyl)-glycero-3-phosphoserine	C26H52NO8P	M+H	1.6676	0.179993
538.35	97.6	LMGP01010612	3	1-hexadecanoyl-2-acetyl-sn-glycero-3-phosphocholine	C26H52NO8P	M+H	1.6676	0.179993
525.278	577.9	Multiple matches: Expand group.
525.278	577.9	LMST03020089	3	(5Z7E)-(1S3R)-262626272727-hexafluoro-910-seco-5710(19)-cholestatriene-1325-triol	C27H38F6O3	M+H	1.64341	0.178362
525.278	577.9	LMST03020088	3	(5Z7E)-(1S3R)-262626272727-hexafluoro-910-seco-5710(19)-cholestatriene-1324-triol	C27H38F6O3	M+H	1.64341	0.178362
246.17	580.8	Multiple matches: Expand group.
246.17	580.8	HMDB13128	3	Valerylcarnitine	C12H23NO4	M+H	1.63495	-0.177789
246.17	580.8	HMDB00688	3	Isovalerylcarnitine	C12H23NO4	M+H	1.63495	-0.177789
246.17	580.8	HMDB00378	3	2-Methylbutyroylcarnitine	C12H23NO4	M+H	1.63495	-0.177789
246.17	580.8	HMDB41993	3	Pivaloylcarnitine	C12H23NO4	M+H	1.63495	-0.177789
246.17	580.8	LMFA07070111	3	(3S)-3-(pentanoyloxy)-4-(trimethylazaniumyl)butanoate	C12H23NO4	M+H	1.63495	-0.177789
246.17	580.8	LMFA07070076	3	3-(3-methylbutanoyl)oxy-4-(trimethylazaniumyl)butanoate	C12H23NO4	M+H	1.63495	-0.177789
246.17	580.8	LMFA07070077	3	(3R)-3-(3-methylbutanoyl)oxy-4-(trimethylazaniumyl)butanoate	C12H23NO4	M+H	1.63495	-0.177789
246.17	580.8	LMFA07070103	3	3-(22-dimethylpropanoyl)oxy-4-(trimethylazaniumyl)butanoate	C12H23NO4	M+H	1.63495	-0.177789
246.17	580.8	LMFA07070034	3	3-(2-methylbutanoyl)oxy-4-(trimethylazaniumyl)butanoate	C12H23NO4	M+H	1.63495	-0.177789
1379.65	44.2	HMDB37221	3	Goyasaponin I	C65H102O31	M+H	1.63486	0.177783
360.095	55.4	HMDB30934	3	Triglochinin	C14H17NO10	M+H	1.6294	-0.177412
266.122	249.4	Multiple matches: Expand group.
266.122	249.4	HMDB04259	3	Acetyl-N-formyl-5-methoxykynurenamine	C13H16N2O4	M+H_[+1]	1.61688	0.17656
266.122	249.4	HMDB00235	3	Thiamine	C12H17N4OS	M+H	1.61688	0.17656
266.122	249.4	HMDB61136	3	di-Hydroxymelatonin	C13H16N2O4	M+H_[+1]	1.61688	0.17656
266.122	249.4	HMDB06344	3	Alpha-N-Phenylacetyl-L-glutamine	C13H16N2O4	M+H_[+1]	1.61688	0.17656
266.122	249.4	HMDB38663	3	D-1-(3-Carboxypropyl)amino-1-deoxyfructose	C10H19NO7	M+H	1.61688	0.17656
169.159	573.6	Multiple matches: Expand group.
169.159	573.6	HMDB33577	3	10-Undecen-2-one	C11H20O	M+H	1.61377	-0.176347
169.159	573.6	HMDB35417	3	(1R2R)-1277-Tetramethylbicyclo221heptan-2-ol	C11H20O	M+H	1.61377	-0.176347
169.159	573.6	HMDB37807	3	9-Undecenal	C11H20O	M+H	1.61377	-0.176347
169.159	573.6	HMDB40247	3	2-Undecenal	C11H20O	M+H	1.61377	-0.176347
169.159	573.6	HMDB32238	3	(-)-trans- and cis-48-Dimethyl-37-nonadien-2-ol	C11H20O	M+H	1.61377	-0.176347
169.159	573.6	HMDB31128	3	10-Undecenal	C11H20O	M+H	1.61377	-0.176347
169.159	573.6	LMFA06000067	3	10-undecenal	C11H20O	M+H	1.61377	-0.176347
169.159	573.6	LMFA12000157	3	10-Undecen-2-one	C11H20O	M+H	1.61377	-0.176347
169.159	573.6	LMFA06000065	3	2-undecenal	C11H20O	M+H	1.61377	-0.176347
169.159	573.6	LMFA05000125	3	347-Trimethyl-2E6-octadien-1-ol	C11H20O	M+H	1.61377	-0.176347
169.159	573.6	LMPR0102090066	3	(2R4R)-1277-tetramethylbicyclo221heptan-2-ol	C11H20O	M+H	1.61377	-0.176347
169.159	573.6	LMFA12000023	3	3-Methyl-3E-decen-2-one	C11H20O	M+H	1.61377	-0.176347
169.159	573.6	LMFA06000066	3	4-undecenal	C11H20O	M+H	1.61377	-0.176347
1347.7	44.3	LMGP15010127	3	2-O-(alpha-D-Manp)-6-O-(alpha-D-Manp-1-6-alpha-D-Manp)-(1-(9Z12Z-octadecadienoyl)-2-(9Z-octadecenoyl)-sn-glycero-3-phospho-1-myo-inositol)	C63H111O28P	M+H	1.61352	0.17633
180.102	573.8	Multiple matches: Expand group.
180.102	573.8	HMDB33763	3	Ethyl N-methylanthranilate	C10H13NO2	M+H	1.58621	-0.174456
180.102	573.8	HMDB29223	3	alpha-Methylphenylalanine	C10H13NO2	M+H	1.58621	-0.174456
180.102	573.8	HMDB30372	3	Maltoxazine	C10H13NO2	M+H	1.58621	-0.174456
180.102	573.8	HMDB42012	3	Salsolinol	C10H13NO2	M+H	1.58621	-0.174456
180.102	573.8	HMDB41931	3	34-Methylenedioxyamphetamine	C10H13NO2	M+H	1.58621	-0.174456
180.102	573.8	HMDB05199	3	(R)-Salsolinol	C10H13NO2	M+H	1.58621	-0.174456
180.102	573.8	HMDB31811	3	35-Dimethylphenyl methylcarbamate	C10H13NO2	M+H	1.58621	-0.174456
180.102	573.8	HMDB40021	3	23-Dihydro-5-(3-hydroxypropanoyl)-1H-pyrrolizine	C10H13NO2	M+H	1.58621	-0.174456
180.102	573.8	HMDB39655	3	123456-Hexahydro-5-(1-hydroxyethylidene)-7H-cyclopentabpyridin-7-one	C10H13NO2	M+H	1.58621	-0.174456
180.102	573.8	HMDB29224	3	N-methylphenylalanine	C10H13NO2	M+H	1.58621	-0.174456
180.102	573.8	HMDB01189	3	2(N)-Methyl-norsalsolinol	C10H13NO2	M+H	1.58621	-0.174456
291.157	78.9	Multiple matches: Expand group.
291.157	78.9	HMDB36771	3	Laurenobiolide	C17H22O4	M+H	1.58282	-0.174222
291.157	78.9	HMDB39949	3	Oudemansin A	C17H22O4	M+H	1.58282	-0.174222
291.157	78.9	HMDB60380	3	3-Polyprenyl-45-dihydroxybenzoate	C17H22O4	M+H	1.58282	-0.174222
291.157	78.9	HMDB29474	3	6-Dehydrogingerdione	C17H22O4	M+H	1.58282	-0.174222
291.157	78.9	LMFA03120026	3	9-oxo-12S-acetoxy-2345-tetranor-7E10Z14Z-prostatetrienaldehyde-cyclo812	C17H22O4	M+H	1.58282	-0.174222
291.157	78.9	LMFA03120025	3	9-oxo-12S-acetoxy-2345-tetranor-7Z10Z14Z-prostatetrienaldehyde-cyclo812	C17H22O4	M+H	1.58282	-0.174222
142.086	563.3	Multiple matches: Expand group.
142.086	563.3	HMDB30352	3	Arecaidine	C7H11NO2	M+H	1.57842	-0.173918
142.086	563.3	HMDB29427	3	L-Hypoglycin A	C7H11NO2	M+H	1.57842	-0.173918
142.086	563.3	HMDB14731	3	Ethosuximide	C7H11NO2	M+H	1.57842	-0.173918
396.311	65.4	Multiple matches: Expand group.
396.311	65.4	HMDB13334	3	912-Hexadecadienoylcarnitine	C23H41NO4	M+H	1.55505	0.172296
396.311	65.4	LMFA07070021	3	3-(7Z10Z)-hexadeca-710-dienoyloxy-4-(trimethylazaniumyl)butanoate	C23H41NO4	M+H	1.55505	0.172296
199.169	529.7	Multiple matches: Expand group.
199.169	529.7	HMDB33378	3	cis-3-Hexenyl hexanoate	C12H22O2	M+H	1.54957	0.171915
199.169	529.7	HMDB32248	3	11-Dodecenoic acid	C12H22O2	M+H	1.54957	0.171915
199.169	529.7	HMDB40163	3	Hexyl 2-methyl-4-pentenoate	C12H22O2	M+H	1.54957	0.171915
199.169	529.7	HMDB37329	3	Ethyl 2-decenoate	C12H22O2	M+H	1.54957	0.171915
199.169	529.7	HMDB34844	3	Citronellyl acetate	C12H22O2	M+H	1.54957	0.171915
199.169	529.7	HMDB38269	3	Hexyl 2E-hexenoate	C12H22O2	M+H	1.54957	0.171915
199.169	529.7	HMDB32235	3	26-Dimethyl-5-heptenal propyleneglycol acetal	C12H22O2	M+H	1.54957	0.171915
199.169	529.7	HMDB40158	3	Hexyl 2-methyl-3-pentenoate	C12H22O2	M+H	1.54957	0.171915
199.169	529.7	HMDB39220	3	Ethyl 4-decenoate	C12H22O2	M+H	1.54957	0.171915
199.169	529.7	HMDB10729	3	trans-Dodec-2-enoic acid	C12H22O2	M+H	1.54957	0.171915
199.169	529.7	HMDB37742	3	xi-5-Dodecanolide	C12H22O2	M+H	1.54957	0.171915
199.169	529.7	HMDB32214	3	cis-4-Decenyl acetate	C12H22O2	M+H	1.54957	0.171915
199.169	529.7	HMDB29585	3	Methyl 10-undecenoate	C12H22O2	M+H	1.54957	0.171915
199.169	529.7	HMDB37186	3	Rhodinyl acetate	C12H22O2	M+H	1.54957	0.171915
199.169	529.7	HMDB37498	3	1-Ethenylhexyl butanoate	C12H22O2	M+H	1.54957	0.171915
199.169	529.7	HMDB38924	3	2-Hexenyl hexanoate	C12H22O2	M+H	1.54957	0.171915
199.169	529.7	HMDB41449	3	(37-Dimethyl-6-octenyl)oxyacetaldehyde	C12H22O2	M+H	1.54957	0.171915
199.169	529.7	HMDB29763	3	Allyl nonanoate	C12H22O2	M+H	1.54957	0.171915
199.169	529.7	HMDB36182	3	55-Dibutyl-45-dihydro-2(3H)furanone	C12H22O2	M+H	1.54957	0.171915
199.169	529.7	HMDB37813	3	3-Heptyldihydro-5-methyl-2(3H)-furanone	C12H22O2	M+H	1.54957	0.171915
199.169	529.7	HMDB40361	3	11-Dimethoxy-37-dimethyl-26-octadiene	C12H22O2	M+H	1.54957	0.171915
199.169	529.7	HMDB41264	3	()-Menthyl acetate	C12H22O2	M+H	1.54957	0.171915
199.169	529.7	HMDB34160	3	()-Citronellyl acetate	C12H22O2	M+H	1.54957	0.171915
199.169	529.7	HMDB38895	3	7-Hexyl-2-oxepanone	C12H22O2	M+H	1.54957	0.171915
199.169	529.7	HMDB38081	3	2-Octenyl butyrate	C12H22O2	M+H	1.54957	0.171915
199.169	529.7	HMDB37305	3	Methyl 9-undecenoate	C12H22O2	M+H	1.54957	0.171915
199.169	529.7	HMDB31683	3	xi-Dihydro-5-octyl-2(3H)-furanone	C12H22O2	M+H	1.54957	0.171915
199.169	529.7	HMDB00529	3	5-Dodecenoic acid	C12H22O2	M+H	1.54957	0.171915
199.169	529.7	LMFA07010207	3	4Z-Decenyl acetate	C12H22O2	M+H	1.54957	0.171915
199.169	529.7	LMFA01030043	3	11-dodecenoic acid	C12H22O2	M+H	1.54957	0.171915
199.169	529.7	LMFA07040040	3	5-dodecanolide	C12H22O2	M+H	1.54957	0.171915
199.169	529.7	LMFA07040038	3	11-Dodecanolide	C12H22O2	M+H	1.54957	0.171915
199.169	529.7	LMFA07010851	3	ethyl (2E)-dec-2-enoate	C12H22O2	M+H	1.54957	0.171915
199.169	529.7	LMFA07040042	3	Dodecan-4-olide	C12H22O2	M+H	1.54957	0.171915
199.169	529.7	LMFA01030042	3	10-dodecenoic acid	C12H22O2	M+H	1.54957	0.171915
199.169	529.7	LMFA07010206	3	3Z-Decenyl acetate	C12H22O2	M+H	1.54957	0.171915
199.169	529.7	LMPK09000031	3	2-Ethyl-8-methyl-17-dioxaspiro55undecane	C12H22O2	M+H	1.54957	0.171915
199.169	529.7	LMPR0102010015	3	-	C12H22O2	M+H	1.54957	0.171915
199.169	529.7	LMPK09000032	3	27-Diethyl-16-dioxaspiro45decane	C12H22O2	M+H	1.54957	0.171915
199.169	529.7	LMFA07010630	3	(Z)-2-Nonenyl propionate	C12H22O2	M+H	1.54957	0.171915
199.169	529.7	LMFA07010904	3	hexyl (2E)-hex-2-enoate	C12H22O2	M+H	1.54957	0.171915
199.169	529.7	LMFA01030223	3	10Z-dodecenoic acid	C12H22O2	M+H	1.54957	0.171915
199.169	529.7	LMFA01030039	3	6-dodecenoic acid	C12H22O2	M+H	1.54957	0.171915
199.169	529.7	LMFA01030037	3	2-dodecenoic acid	C12H22O2	M+H	1.54957	0.171915
199.169	529.7	LMFA07010778	3	prop-2-en-1-yl nonanoate	C12H22O2	M+H	1.54957	0.171915
199.169	529.7	LMFA07010210	3	7Z-Decenyl acetate	C12H22O2	M+H	1.54957	0.171915
199.169	529.7	LMFA07010905	3	hexyl 2-methylpent-4-enoate	C12H22O2	M+H	1.54957	0.171915
199.169	529.7	LMFA01030038	3	4-dodecenoic acid	C12H22O2	M+H	1.54957	0.171915
199.169	529.7	LMFA12000249	3	3-Ethylundecan-24-dione	C12H22O2	M+H	1.54957	0.171915
199.169	529.7	LMFA01030225	3	5E-dodecenoic acid	C12H22O2	M+H	1.54957	0.171915
199.169	529.7	LMFA07010202	3	4E-Decenyl acetate	C12H22O2	M+H	1.54957	0.171915
199.169	529.7	LMFA01030768	3	3Z-dodecenoic acid	C12H22O2	M+H	1.54957	0.171915
199.169	529.7	LMFA07011010	3	37-dimethyloct-7-en-1-yl acetate	C12H22O2	M+H	1.54957	0.171915
199.169	529.7	LMFA07010958	3	methyl (9Z)-undec-9-enoate	C12H22O2	M+H	1.54957	0.171915
199.169	529.7	LMFA01030224	3	2Z-dodecenoic acid	C12H22O2	M+H	1.54957	0.171915
199.169	529.7	LMFA01030772	3	3E-dodecenoic acid	C12H22O2	M+H	1.54957	0.171915
199.169	529.7	LMFA07010208	3	5Z-Decenyl acetate	C12H22O2	M+H	1.54957	0.171915
199.169	529.7	LMFA07010201	3	2E-Decenyl acetate	C12H22O2	M+H	1.54957	0.171915
199.169	529.7	LMFA07010587	3	(E)-2-Hexenyl hexanoate	C12H22O2	M+H	1.54957	0.171915
199.169	529.7	LMFA07010812	3	(3R)-37-dimethyloct-6-en-1-yl acetate	C12H22O2	M+H	1.54957	0.171915
199.169	529.7	LMFA07010594	3	(Z)-3-Hexenyl hexanoate	C12H22O2	M+H	1.54957	0.171915
199.169	529.7	LMFA07010603	3	(E)-2-Octenyl butyrate	C12H22O2	M+H	1.54957	0.171915
199.169	529.7	LMPK09000030	3	2-Propyl-17-dioxaspiro55undecane	C12H22O2	M+H	1.54957	0.171915
199.169	529.7	LMFA01030788	3	2E-Dodecenoic acid	C12H22O2	M+H	1.54957	0.171915
199.169	529.7	LMFA07010203	3	5E-Decenyl acetate	C12H22O2	M+H	1.54957	0.171915
199.169	529.7	LMPK09000019	3	(6R8S)-228-Trimethyl-17-dioxaspiro55undecane	C12H22O2	M+H	1.54957	0.171915
199.169	529.7	LMFA07010937	3	methyl undec-10-enoate	C12H22O2	M+H	1.54957	0.171915
199.169	529.7	LMFA07010868	3	ethyl (4E)-dec-4-enoate	C12H22O2	M+H	1.54957	0.171915
199.169	529.7	LMFA01030226	3	5Z-dodecenoic acid	C12H22O2	M+H	1.54957	0.171915
199.169	529.7	LMFA01030229	3	9Z-dodecenoic acid	C12H22O2	M+H	1.54957	0.171915
199.169	529.7	LMFA01020106	3	5-methyl-2-undecenoic acid	C12H22O2	M+H	1.54957	0.171915
199.169	529.7	LMFA01030227	3	6Z-dodecenoic acid	C12H22O2	M+H	1.54957	0.171915
199.169	529.7	LMFA07010204	3	7E-Decenyl acetate	C12H22O2	M+H	1.54957	0.171915
199.169	529.7	LMFA01030228	3	7Z-dodecenoic acid	C12H22O2	M+H	1.54957	0.171915
199.169	529.7	LMFA01030041	3	9-dodecenoic acid	C12H22O2	M+H	1.54957	0.171915
199.169	529.7	LMFA07010710	3	oct-1-en-3-yl butanoate	C12H22O2	M+H	1.54957	0.171915
199.169	529.7	LMFA01030040	3	7-dodecenoic acid	C12H22O2	M+H	1.54957	0.171915
199.169	529.7	LMPK09000015	3	(2S4R6R8S)-248-Trimethyl-17-dioxaspiro-55undecane	C12H22O2	M+H	1.54957	0.171915
178.123	565.5	Multiple matches: Expand group.
178.123	565.5	HMDB40019	3	1-(23-Dihydro-5-ethyl-1H-pyrrolizin-7-yl)ethanone	C11H15NO	M+H	1.5422	-0.1714
178.123	565.5	HMDB41923	3	Mephedrone	C11H15NO	M+H	1.5422	-0.1714
178.123	565.5	HMDB40020	3	5-Acetyl-23-dihydro-67-dimethyl-1H-pyrrolizine	C11H15NO	M+H	1.5422	-0.1714
178.123	565.5	HMDB40017	3	23-Dihydro-7-methyl-5-propanoyl-1H-pyrrolizine	C11H15NO	M+H	1.5422	-0.1714
178.123	565.5	HMDB40014	3	1-(23-Dihydro-1H-pyrrolizin-5-yl)-1-butanone	C11H15NO	M+H	1.5422	-0.1714
178.123	565.5	HMDB40018	3	23-Dihydro-6-methyl-5-propanoyl-1H-pyrrolizine	C11H15NO	M+H	1.5422	-0.1714
178.123	565.5	HMDB39667	3	2367-Tetrahydro-67-dimethylcyclopentbazepin-8(1H)-one	C11H15NO	M+H	1.5422	-0.1714
178.123	565.5	HMDB40027	3	1-(23-Dihydro-56-dimethyl-1H-pyrrolizin-7-yl)ethanone	C11H15NO	M+H	1.5422	-0.1714
178.123	565.5	HMDB33484	3	(S)-Valerianine	C11H15NO	M+H	1.5422	-0.1714
178.123	565.5	HMDB14968	3	Phenmetrazine	C11H15NO	M+H	1.5422	-0.1714
178.123	565.5	HMDB39664	3	7-Ethyl-2367-tetrahydrocyclopentbazepin-8(1H)-one	C11H15NO	M+H	1.5422	-0.1714
148.043	68	HMDB59611	3	Thiomorpholine 3-carboxylate	C5H9NO2S	M+H	1.5421	-0.171392
570.318	55.5	Multiple matches: Expand group.
570.318	55.5	HMDB01097	3	Protoporphyrinogen IX	C34H40N4O4	M+H_[+1]	1.51789	-0.169692
570.318	55.5	HMDB34101	3	Adouetine Y	C34H40N4O4	M+H_[+1]	1.51789	-0.169692
570.318	55.5	HMDB29342	3	Ceanothine E	C34H40N4O4	M+H_[+1]	1.51789	-0.169692
570.318	55.5	LMPR0106080005	3	(4alpha6beta8alpha9beta13alpha14beta16beta17beta)-616- bis(acetyloxy)-37-dioxo-29-nordammara-117(20)24-trien-21-oic acid	C33H44O8	M+H_[+1]	1.51789	-0.169692
247.095	44.1	Multiple matches: Expand group.
247.095	44.1	HMDB28754	3	Aspartyl-Hydroxyproline	C9H14N2O6	M+H	1.51666	0.169605
247.095	44.1	HMDB34384	3	Corticrocin	C14H14O4	M+H	1.51666	0.169605
247.095	44.1	HMDB00497	3	56-Dihydrouridine	C9H14N2O6	M+H	1.51666	0.169605
247.095	44.1	HMDB38473	3	Torachrysone	C14H14O4	M+H	1.51666	0.169605
247.095	44.1	HMDB33914	3	Aegelinol	C14H14O4	M+H	1.51666	0.169605
247.095	44.1	HMDB30786	3	Marmesin	C14H14O4	M+H	1.51666	0.169605
247.095	44.1	HMDB11160	3	L-alpha-Aspartyl-L-hydroxyproline	C9H14N2O6	M+H	1.51666	0.169605
247.095	44.1	HMDB39493	3	Dihydrowyerone acid	C14H14O4	M+H	1.51666	0.169605
367.992	567.1	HMDB41985	3	Phosalone	C12H15ClNO4PS2	M+H	1.51607	0.169564
114.055	84	Multiple matches: Expand group.
114.055	84	HMDB06875	3	1-Pyrroline-2-carboxylic acid	C5H7NO2	M+H	1.5142	-0.169431
114.055	84	HMDB01301	3	1-Pyrroline-5-carboxylic acid	C5H7NO2	M+H	1.5142	-0.169431
677.36	137.9	HMDB35701	3	Cucurbitacin I 2-glucoside	C36H52O12	M+H	1.50604	0.168854
479.296	570.8	Multiple matches: Expand group.
479.296	570.8	HMDB41365	3	25-Acetylvulgaroside	C27H42O7	M+H	1.50355	-0.168678
479.296	570.8	HMDB31896	3	Erinacine D	C27H42O7	M+H	1.50355	-0.168678
369.283	58.5	Multiple matches: Expand group.
369.283	58.5	HMDB13331	3	3 5-Tetradecadiencarnitine	C21H37NO4	M+H_[+1]	1.49736	0.168238
369.283	58.5	LMFA07070020	3	3-(5Z8Z)-tetradeca-58-dienoyloxy-4-(trimethylazaniumyl)butanoate	C21H37NO4	M+H_[+1]	1.49736	0.168238
286.201	570	Multiple matches: Expand group.
286.201	570	HMDB13324	3	2-Octenoylcarnitine	C15H27NO4	M+H	1.49495	-0.168067
286.201	570	LMFA07070014	3	3-(2E)-oct-2-enoyloxy-4-(trimethylazaniumyl)butanoate	C15H27NO4	M+H	1.49495	-0.168067
286.201	570	LMFA07070035	3	(3S)-3-(2E)-oct-2-enoyloxy-4-(trimethylazaniumyl)butanoate	C15H27NO4	M+H	1.49495	-0.168067
510.319	155.9	Multiple matches: Expand group.
510.319	155.9	LMGP01011251	3	12-dioctanoyl-sn-glycero-3-phosphocholine	C24H48NO8P	M+H	1.47278	0.166485
510.319	155.9	LMGP01010504	3	1-tetradecanoyl-2-acetyl-sn-glycero-3-phosphocholine	C24H48NO8P	M+H	1.47278	0.166485
510.319	155.9	LMGP03070002	3	1-(1Z-octadecenyl)-glycero-3-phosphoserine	C24H48NO8P	M+H	1.47278	0.166485
481.302	570.2	Multiple matches: Expand group.
481.302	570.2	LMST03020304	3	(7E)-(1S3R6S)-619-epithio-910-seco-5(10)7-cholestadiene-1325-triol SS-dioxide	C27H44O5S	M+H	1.47209	0.166435
481.302	570.2	LMST03020303	3	(7E)-(1S3R6R)-619-epithio-910-seco-5(10)7-cholestadiene-1325-triol SS-dioxide	C27H44O5S	M+H	1.47209	0.166435
481.302	570.2	LMST03020305	3	(7E)-(3S6RS24R)-619-epithio-910-seco-5(10)7-cholestadiene-32425-triol SS-dioxide	C27H44O5S	M+H	1.47209	0.166435
138.055	14.7	Multiple matches: Expand group.
138.055	14.7	HMDB01123	3	2-Aminobenzoic acid	C7H7NO2	M+H	1.46158	-0.165681
138.055	14.7	HMDB00875	3	Trigonelline	C7H7NO2	M+H	1.46158	-0.165681
138.055	14.7	HMDB01891	3	m-Aminobenzoic acid	C7H7NO2	M+H	1.46158	-0.165681
138.055	14.7	HMDB15687	3	Salicylamide	C7H7NO2	M+H	1.46158	-0.165681
138.055	14.7	HMDB29806	3	Methyl nicotinate	C7H7NO2	M+H	1.46158	-0.165681
138.055	14.7	HMDB60722	3	2-Pyridylacetic acid	C7H7NO2	M+H	1.46158	-0.165681
138.055	14.7	HMDB01392	3	p-Aminobenzoic acid	C7H7NO2	M+H	1.46158	-0.165681
138.055	14.7	HMDB01538	3	3-Pyridylacetic acid	C7H7NO2	M+H	1.46158	-0.165681
482.264	56.4	Multiple matches: Expand group.
482.264	56.4	HMDB32839	3	Citronellyl beta-sophoroside	C22H40O11	M+H_[+1]	1.46044	-0.165599
482.264	56.4	LMPR0104310003	3	-	C29H36O6	M+H_[+1]	1.46044	-0.165599
482.264	56.4	LMFA13030006	3	3-O-(alpha-L-rhamnopyranosyl-(1-2)-alpha-L-rhamnopyranosyl)-3-hydroxydecanoic acid	C22H40O11	M+H_[+1]	1.46044	-0.165599
155.047	18.1	HMDB12209	3	Diethylphosphate	C4H11O4P	M+H	1.45795	-0.16542
481.263	56	Multiple matches: Expand group.
481.263	56	HMDB32839	3	Citronellyl beta-sophoroside	C22H40O11	M+H	1.45244	-0.165022
481.263	56	LMFA13030006	3	3-O-(alpha-L-rhamnopyranosyl-(1-2)-alpha-L-rhamnopyranosyl)-3-hydroxydecanoic acid	C22H40O11	M+H	1.45244	-0.165022
481.263	56	LMPR0104310003	3	-	C29H36O6	M+H	1.45244	-0.165022
279.159	15.4	Multiple matches: Expand group.
279.159	15.4	HMDB13835	3	Diisobutyl phthalate	C16H22O4	M+H	1.45192	-0.164984
279.159	15.4	HMDB13248	3	Monoethylhexyl phthalic acid	C16H22O4	M+H	1.45192	-0.164984
279.159	15.4	HMDB33244	3	Dibutyl phthalate	C16H22O4	M+H	1.45192	-0.164984
279.159	15.4	HMDB01518	3	Alpha-CEHC	C16H22O4	M+H	1.45192	-0.164984
279.159	15.4	LMPR0103200001	3	-	C16H22O4	M+H	1.45192	-0.164984
279.159	15.4	LMPR02020063	3	-	C16H22O4	M+H	1.45192	-0.164984
153.077	69.9	Multiple matches: Expand group.
153.077	69.9	HMDB33730	3	L-2-(Hydroxymethyl)-1234-butanetetrol	C5H12O5	M+H	1.45094	-0.164914
153.077	69.9	HMDB01851	3	L-Arabitol	C5H12O5	M+H	1.45094	-0.164914
153.077	69.9	HMDB00568	3	D-Arabitol	C5H12O5	M+H	1.45094	-0.164914
153.077	69.9	HMDB00508	3	Ribitol	C5H12O5	M+H	1.45094	-0.164914
153.077	69.9	HMDB02917	3	D-Xylitol	C5H12O5	M+H	1.45094	-0.164914
288.217	63.4	Multiple matches: Expand group.
288.217	63.4	HMDB00791	3	L-Octanoylcarnitine	C15H29NO4	M+H	1.42753	0.163216
288.217	63.4	LMFA07070002	3	O-octanoyl-R-carnitine	C15H29NO4	M+H	1.42753	0.163216
288.217	63.4	LMFA07070095	3	3-(octanoyloxy)-4-(trimethylazaniumyl)butanoate	C15H29NO4	M+H	1.42753	0.163216
583.255	379.2	HMDB01008	3	Biliverdin	C33H34N4O6	M+H	1.42718	0.163191
274.215	567.4	Multiple matches: Expand group.
274.215	567.4	HMDB31184	3	N-Isobutyl-2481012-tetradecapentaenamide	C18H27NO	M+H	1.42379	-0.162944
274.215	567.4	LMFA08020179	3	(2E4E8Z10E12E)-N-(2-methylpropyl)tetradeca-2481012-pentaenamide	C18H27NO	M+H	1.42379	-0.162944
274.215	567.4	LMFA08020195	3	(2E4E8E10E12E)-N-(2-methylpropyl)tetradeca-2481012-pentaenamide	C18H27NO	M+H	1.42379	-0.162944
501.28	411.7	Multiple matches: Expand group.
501.28	411.7	HMDB11489	3	LysoPE(0:020:5(5Z8Z11Z14Z17Z))	C25H42NO7P	M+H_[+1]	1.41911	0.162602
501.28	411.7	HMDB11519	3	LysoPE(20:5(5Z8Z11Z14Z17Z)0:0)	C25H42NO7P	M+H_[+1]	1.41911	0.162602
501.28	411.7	LMGP02050027	3	1-(5Z8Z11Z14Z17Z-eicosapentaenoyl)-glycero-3-phosphoethanolamine	C25H42NO7P	M+H_[+1]	1.41911	0.162602
501.28	411.7	LMGP02050053	3	(2-aminoethoxy)(2R)-3-hydroxy-2-(5Z8Z11Z14Z17Z)-icosa-58111417-pentaenoyloxypropoxyphosphinic acid	C25H42NO7P	M+H_[+1]	1.41911	0.162602
185.081	13	Multiple matches: Expand group.
185.081	13	HMDB40603	3	()-threo-1-(4-Hydroxyphenyl)-123-propanetriol	C9H12O4	M+H	1.39136	-0.160565
185.081	13	HMDB01490	3	Vanylglycol	C9H12O4	M+H	1.39136	-0.160565
185.081	13	HMDB59730	3	34-Methylenepimelic acid	C9H12O4	M+H	1.39136	-0.160565
185.081	13	HMDB35056	3	1-(3-Hydroxy-4-methoxyphenyl)-12-ethanediol	C9H12O4	M+H	1.39136	-0.160565
185.081	13	HMDB39650	3	4-Formyl-3-(formylmethyl)-4-hexenoic acid	C9H12O4	M+H	1.39136	-0.160565
185.081	13	HMDB29748	3	2-Aminodipyrido12-a:32-dimidazole	C10H8N4	M+H	1.39136	-0.160565
185.081	13	HMDB36072	3	Genipic acid	C9H12O4	M+H	1.39136	-0.160565
185.081	13	HMDB01565	3	Phosphorylcholine	C5H15NO4P	M+H	1.39136	-0.160565
185.081	13	LMFA01030984	3	(4E)-4-formyl-3-(2-oxoethyl)hex-4-enoic acid	C9H12O4	M+H	1.39136	-0.160565
431.299	329.1	Multiple matches: Expand group.
431.299	329.1	HMDB39079	3	beta-Citraurin epoxide	C30H40O3	M+H-H2O	1.37904	-0.159654
431.299	329.1	HMDB00653	3	Cholesterol sulfate	C27H46O4S	M+H-2H2O	1.37904	-0.159654
431.299	329.1	HMDB39024	3	58-Epoxy-58-dihydro-3-hydroxy-8-apo-by-carotenal	C30H40O3	M+H-H2O	1.37904	-0.159654
431.299	329.1	LMST05020016	3	cholest-5-en-3beta-yl hydrogen sulfate	C27H46O4S	M+H-2H2O	1.37904	-0.159654
431.299	329.1	LMST03020250	3	(7E)-(3S6R)-619-epithio-910-seco-5(10)7-cholestadien-3-ol SS-dioxide	C27H44O3S	M+H-H2O	1.37904	-0.159654
431.299	329.1	LMST03020251	3	(7E)-(3S6S)-619-epithio-910-seco-5(10)7-cholestadien-3-ol SS-dioxide	C27H44O3S	M+H-H2O	1.37904	-0.159654
431.299	329.1	LMST03020264	3	(5Z7E)-(1S3R20R)-24a-homo-910-seco-22-thia-5710(19)-cholestatriene-1325-triol	C27H44O3S	M+H-H2O	1.37904	-0.159654
431.299	329.1	LMST03020263	3	(5Z7E)-(1S3R)-24a-homo-910-seco-22-thia-5710(19)-cholestatriene-1325-triol	C27H44O3S	M+H-H2O	1.37904	-0.159654
909.797	43.5	Multiple matches: Expand group.
909.797	43.5	HMDB44772	3	TG(18:018:020:5(5Z8Z11Z14Z17Z))	C59H104O6	M+H	1.37873	-0.159631
909.797	43.5	HMDB44746	3	TG(18:016:022:5(7Z10Z13Z16Z19Z))	C59H104O6	M+H	1.37873	-0.159631
909.797	43.5	HMDB52031	3	TG(24:1(15Z)14:1(9Z)18:3(6Z9Z12Z))	C59H104O6	M+H	1.37873	-0.159631
909.797	43.5	HMDB46475	3	TG(22:016:1(9Z)18:4(6Z9Z12Z15Z))	C59H104O6	M+H	1.37873	-0.159631
909.797	43.5	HMDB05387	3	TG(16:020:1(11Z)20:4(5Z8Z11Z14Z))iso6	C59H104O6	M+H	1.37873	-0.159631
909.797	43.5	HMDB46451	3	TG(22:014:1(9Z)20:4(8Z11Z14Z17Z))	C59H104O6	M+H	1.37873	-0.159631
909.797	43.5	HMDB45706	3	TG(20:016:1(9Z)20:4(8Z11Z14Z17Z))	C59H104O6	M+H	1.37873	-0.159631
909.797	43.5	HMDB51927	3	TG(24:1(15Z)14:018:4(6Z9Z12Z15Z))	C59H104O6	M+H	1.37873	-0.159631
909.797	43.5	HMDB46131	3	TG(20:020:4(8Z11Z14Z17Z)16:1(9Z))	C59H104O6	M+H	1.37873	-0.159631
909.797	43.5	HMDB44741	3	TG(18:016:022:5(4Z7Z10Z13Z16Z))	C59H104O6	M+H	1.37873	-0.159631
909.797	43.5	HMDB46277	3	TG(22:014:020:5(5Z8Z11Z14Z17Z))	C59H104O6	M+H	1.37873	-0.159631
909.797	43.5	HMDB42621	3	TG(14:020:3n622:2(13Z16Z))	C59H104O6	M+H	1.37873	-0.159631
909.797	43.5	HMDB51554	3	TG(22:1(13Z)16:1(9Z)18:3(9Z12Z15Z))	C59H104O6	M+H	1.37873	-0.159631
909.797	43.5	HMDB46107	3	TG(20:018:4(6Z9Z12Z15Z)18:1(9Z))	C59H104O6	M+H	1.37873	-0.159631
909.797	43.5	HMDB46445	3	TG(22:014:1(9Z)20:4(5Z8Z11Z14Z))	C59H104O6	M+H	1.37873	-0.159631
909.797	43.5	HMDB52038	3	TG(24:1(15Z)14:1(9Z)18:3(9Z12Z15Z))	C59H104O6	M+H	1.37873	-0.159631
909.797	43.5	HMDB49776	3	TG(18:1(9Z)18:020:4(8Z11Z14Z17Z))	C59H104O6	M+H	1.37873	-0.159631
909.797	43.5	HMDB49883	3	TG(18:1(9Z)18:1(11Z)20:3(5Z8Z11Z))	C59H104O6	M+H	1.37873	-0.159631
909.797	43.5	HMDB48539	3	TG(16:1(9Z)22:018:4(6Z9Z12Z15Z))	C59H104O6	M+H	1.37873	-0.159631
909.797	43.5	HMDB44902	3	TG(18:016:1(9Z)22:4(7Z10Z13Z16Z))	C59H104O6	M+H	1.37873	-0.159631
909.797	43.5	HMDB42203	3	TG(14:020:022:5(4Z7Z10Z13Z16Z))	C59H104O6	M+H	1.37873	-0.159631
909.797	43.5	HMDB49795	3	TG(18:1(9Z)20:018:4(6Z9Z12Z15Z))	C59H104O6	M+H	1.37873	-0.159631
909.797	43.5	HMDB47191	3	TG(24:014:1(9Z)18:4(6Z9Z12Z15Z))	C59H104O6	M+H	1.37873	-0.159631
909.797	43.5	HMDB42505	3	TG(14:024:1(15Z)18:4(6Z9Z12Z15Z))	C59H104O6	M+H	1.37873	-0.159631
909.797	43.5	HMDB42470	3	TG(14:022:1(13Z)20:4(5Z8Z11Z14Z))	C59H104O6	M+H	1.37873	-0.159631
909.797	43.5	HMDB52877	3	TG(18:3(6Z9Z12Z)16:022:2(13Z16Z))	C59H104O6	M+H	1.37873	-0.159631
909.797	43.5	HMDB45495	3	TG(20:014:022:5(4Z7Z10Z13Z16Z))	C59H104O6	M+H	1.37873	-0.159631
909.797	43.5	HMDB42795	3	TG(14:018:4(6Z9Z12Z15Z)24:1(15Z))	C59H104O6	M+H	1.37873	-0.159631
909.797	43.5	HMDB44410	3	TG(16:022:2(13Z16Z)18:3(9Z12Z15Z))	C59H104O6	M+H	1.37873	-0.159631
909.797	43.5	HMDB44933	3	TG(18:018:1(11Z)20:4(8Z11Z14Z17Z))	C59H104O6	M+H	1.37873	-0.159631
909.797	43.5	HMDB48659	3	TG(16:1(9Z)20:1(11Z)20:3(5Z8Z11Z))	C59H104O6	M+H	1.37873	-0.159631
909.797	43.5	HMDB44424	3	TG(16:022:4(7Z10Z13Z16Z)18:1(11Z))	C59H104O6	M+H	1.37873	-0.159631
909.797	43.5	HMDB43933	3	TG(16:018:022:5(4Z7Z10Z13Z16Z))	C59H104O6	M+H	1.37873	-0.159631
909.797	43.5	HMDB43938	3	TG(16:018:022:5(7Z10Z13Z16Z19Z))	C59H104O6	M+H	1.37873	-0.159631
909.797	43.5	HMDB50346	3	TG(20:1(11Z)16:020:4(5Z8Z11Z14Z))	C59H104O6	M+H	1.37873	-0.159631
909.797	43.5	HMDB50370	3	TG(20:1(11Z)18:018:4(6Z9Z12Z15Z))	C59H104O6	M+H	1.37873	-0.159631
909.797	43.5	HMDB10463	3	TG(18:1(9Z)18:1(9Z)20:3(8Z11Z14Z))iso3	C59H104O6	M+H	1.37873	-0.159631
909.797	43.5	HMDB42875	3	TG(14:022:5(7Z10Z13Z16Z19Z)20:0)	C59H104O6	M+H	1.37873	-0.159631
909.797	43.5	HMDB46106	3	TG(20:018:4(6Z9Z12Z15Z)18:1(11Z))	C59H104O6	M+H	1.37873	-0.159631
909.797	43.5	HMDB52533	3	TG(18:2(9Z12Z)18:1(11Z)20:2n6)	C59H104O6	M+H	1.37873	-0.159631
909.797	43.5	HMDB49770	3	TG(18:1(9Z)18:020:4(5Z8Z11Z14Z))	C59H104O6	M+H	1.37873	-0.159631
909.797	43.5	HMDB51453	3	TG(22:1(13Z)16:018:4(6Z9Z12Z15Z))	C59H104O6	M+H	1.37873	-0.159631
909.797	43.5	HMDB45700	3	TG(20:016:1(9Z)20:4(5Z8Z11Z14Z))	C59H104O6	M+H	1.37873	-0.159631
909.797	43.5	HMDB42412	3	TG(14:020:1(11Z)22:4(7Z10Z13Z16Z))	C59H104O6	M+H	1.37873	-0.159631
909.797	43.5	HMDB49437	3	TG(18:1(11Z)20:2n620:2n6)	C59H104O6	M+H	1.37873	-0.159631
909.797	43.5	HMDB45551	3	TG(20:016:020:5(5Z8Z11Z14Z17Z))	C59H104O6	M+H	1.37873	-0.159631
909.797	43.5	HMDB49450	3	TG(18:1(11Z)20:3n618:1(11Z))	C59H104O6	M+H	1.37873	-0.159631
909.797	43.5	HMDB42846	3	TG(14:020:5(5Z8Z11Z14Z17Z)22:0)	C59H104O6	M+H	1.37873	-0.159631
909.797	43.5	HMDB44927	3	TG(18:018:1(11Z)20:4(5Z8Z11Z14Z))	C59H104O6	M+H	1.37873	-0.159631
909.797	43.5	HMDB42208	3	TG(14:020:022:5(7Z10Z13Z16Z19Z))	C59H104O6	M+H	1.37873	-0.159631
909.797	43.5	HMDB49941	3	TG(18:1(9Z)20:3(5Z8Z11Z)18:1(9Z))	C59H104O6	M+H	1.37873	-0.159631
909.797	43.5	HMDB51532	3	TG(22:1(13Z)14:1(9Z)20:3n6)	C59H104O6	M+H	1.37873	-0.159631
909.797	43.5	HMDB49889	3	TG(18:1(9Z)18:1(11Z)20:3n6)	C59H104O6	M+H	1.37873	-0.159631
909.797	43.5	HMDB48518	3	TG(16:1(9Z)20:020:4(8Z11Z14Z17Z))	C59H104O6	M+H	1.37873	-0.159631
909.797	43.5	HMDB53655	3	TG(20:3n614:022:2(13Z16Z))	C59H104O6	M+H	1.37873	-0.159631
909.797	43.5	HMDB44425	3	TG(16:022:4(7Z10Z13Z16Z)18:1(9Z))	C59H104O6	M+H	1.37873	-0.159631
909.797	43.5	HMDB10484	3	TG(18:2(9Z12Z)18:1(9Z)20:2(11Z14Z))iso6	C59H104O6	M+H	1.37873	-0.159631
909.797	43.5	HMDB45188	3	TG(18:020:4(5Z8Z11Z14Z)18:1(9Z))	C59H104O6	M+H	1.37873	-0.159631
909.797	43.5	HMDB49451	3	TG(18:1(11Z)20:3n618:1(9Z))	C59H104O6	M+H	1.37873	-0.159631
909.797	43.5	HMDB49752	3	TG(18:1(9Z)16:022:4(7Z10Z13Z16Z))	C59H104O6	M+H	1.37873	-0.159631
909.797	43.5	HMDB42824	3	TG(14:020:4(8Z11Z14Z17Z)22:1(13Z))	C59H104O6	M+H	1.37873	-0.159631
909.797	43.5	HMDB48680	3	TG(16:1(9Z)20:3(5Z8Z11Z)20:1(11Z))	C59H104O6	M+H	1.37873	-0.159631
909.797	43.5	HMDB49270	3	TG(18:1(11Z)18:1(11Z)20:3n6)	C59H104O6	M+H	1.37873	-0.159631
909.797	43.5	HMDB43965	3	TG(16:020:020:5(5Z8Z11Z14Z17Z))	C59H104O6	M+H	1.37873	-0.159631
909.797	43.5	HMDB50877	3	TG(20:3(5Z8Z11Z)14:022:2(13Z16Z))	C59H104O6	M+H	1.37873	-0.159631
909.797	43.5	HMDB50996	3	TG(20:3(5Z8Z11Z)14:1(9Z)22:1(13Z))	C59H104O6	M+H	1.37873	-0.159631
909.797	43.5	HMDB50022	3	TG(18:1(9Z)18:3(6Z9Z12Z)20:1(11Z))	C59H104O6	M+H	1.37873	-0.159631
909.797	43.5	HMDB49927	3	TG(18:1(9Z)20:1(11Z)18:3(6Z9Z12Z))	C59H104O6	M+H	1.37873	-0.159631
909.797	43.5	HMDB49264	3	TG(18:1(11Z)18:1(11Z)20:3(5Z8Z11Z))	C59H104O6	M+H	1.37873	-0.159631
909.797	43.5	HMDB48665	3	TG(16:1(9Z)20:1(11Z)20:3n6)	C59H104O6	M+H	1.37873	-0.159631
909.797	43.5	HMDB45676	3	TG(20:014:1(9Z)22:4(7Z10Z13Z16Z))	C59H104O6	M+H	1.37873	-0.159631
909.797	43.5	HMDB51420	3	TG(22:1(13Z)14:020:4(8Z11Z14Z17Z))	C59H104O6	M+H	1.37873	-0.159631
909.797	43.5	HMDB44215	3	TG(16:022:1(13Z)18:4(6Z9Z12Z15Z))	C59H104O6	M+H	1.37873	-0.159631
909.797	43.5	HMDB45975	3	TG(20:020:4(5Z8Z11Z14Z)16:1(9Z))	C59H104O6	M+H	1.37873	-0.159631
909.797	43.5	HMDB50453	3	TG(20:1(11Z)16:1(9Z)20:3(5Z8Z11Z))	C59H104O6	M+H	1.37873	-0.159631
909.797	43.5	HMDB49557	3	TG(18:1(11Z)18:3(9Z12Z15Z)20:1(11Z))	C59H104O6	M+H	1.37873	-0.159631
909.797	43.5	HMDB50310	3	TG(20:1(11Z)14:022:4(7Z10Z13Z16Z))	C59H104O6	M+H	1.37873	-0.159631
909.797	43.5	HMDB48099	3	TG(14:1(9Z)18:3(6Z9Z12Z)24:1(15Z))	C59H104O6	M+H	1.37873	-0.159631
909.797	43.5	HMDB50008	3	TG(18:1(9Z)18:2(9Z12Z)20:2n6)	C59H104O6	M+H	1.37873	-0.159631
909.797	43.5	HMDB51414	3	TG(22:1(13Z)14:020:4(5Z8Z11Z14Z))	C59H104O6	M+H	1.37873	-0.159631
909.797	43.5	HMDB44538	3	TG(16:020:4(8Z11Z14Z17Z)20:1(11Z))	C59H104O6	M+H	1.37873	-0.159631
909.797	43.5	HMDB10462	3	TG(18:1(9Z)18:1(9Z)20:3(5Z8Z11Z))iso3	C59H104O6	M+H	1.37873	-0.159631
909.797	43.5	HMDB44512	3	TG(16:018:4(6Z9Z12Z15Z)22:1(13Z))	C59H104O6	M+H	1.37873	-0.159631
909.797	43.5	HMDB49934	3	TG(18:1(9Z)20:1(11Z)18:3(9Z12Z15Z))	C59H104O6	M+H	1.37873	-0.159631
909.797	43.5	HMDB42476	3	TG(14:022:1(13Z)20:4(8Z11Z14Z17Z))	C59H104O6	M+H	1.37873	-0.159631
909.797	43.5	HMDB51547	3	TG(22:1(13Z)16:1(9Z)18:3(6Z9Z12Z))	C59H104O6	M+H	1.37873	-0.159631
909.797	43.5	HMDB44403	3	TG(16:022:2(13Z16Z)18:3(6Z9Z12Z))	C59H104O6	M+H	1.37873	-0.159631
909.797	43.5	HMDB44160	3	TG(16:020:1(11Z)20:4(8Z11Z14Z17Z))	C59H104O6	M+H	1.37873	-0.159631
909.797	43.5	HMDB49171	3	TG(18:1(11Z)20:018:4(6Z9Z12Z15Z))	C59H104O6	M+H	1.37873	-0.159631
909.797	43.5	HMDB44559	3	TG(16:020:5(5Z8Z11Z14Z17Z)20:0)	C59H104O6	M+H	1.37873	-0.159631
909.797	43.5	HMDB48492	3	TG(16:1(9Z)18:022:4(7Z10Z13Z16Z))	C59H104O6	M+H	1.37873	-0.159631
909.797	43.5	HMDB49909	3	TG(18:1(9Z)18:1(9Z)20:3n6)	C59H104O6	M+H	1.37873	-0.159631
909.797	43.5	HMDB42644	3	TG(14:020:4(5Z8Z11Z14Z)22:1(13Z))	C59H104O6	M+H	1.37873	-0.159631
909.797	43.5	HMDB45240	3	TG(18:022:4(7Z10Z13Z16Z)16:1(9Z))	C59H104O6	M+H	1.37873	-0.159631
909.797	43.5	HMDB46883	3	TG(22:020:4(8Z11Z14Z17Z)14:1(9Z))	C59H104O6	M+H	1.37873	-0.159631
909.797	43.5	HMDB45757	3	TG(20:018:1(9Z)18:4(6Z9Z12Z15Z))	C59H104O6	M+H	1.37873	-0.159631
909.797	43.5	HMDB53381	3	TG(20:2n618:1(11Z)20:2n6)	C59H104O6	M+H	1.37873	-0.159631
909.797	43.5	HMDB49435	3	TG(18:1(11Z)20:2n618:2(9Z12Z))	C59H104O6	M+H	1.37873	-0.159631
909.797	43.5	HMDB50352	3	TG(20:1(11Z)16:020:4(8Z11Z14Z17Z))	C59H104O6	M+H	1.37873	-0.159631
909.797	43.5	HMDB47582	3	TG(24:018:4(6Z9Z12Z15Z)14:1(9Z))	C59H104O6	M+H	1.37873	-0.159631
909.797	43.5	HMDB48034	3	TG(14:1(9Z)22:1(13Z)20:3n6)	C59H104O6	M+H	1.37873	-0.159631
909.797	43.5	HMDB48028	3	TG(14:1(9Z)22:1(13Z)20:3(5Z8Z11Z))	C59H104O6	M+H	1.37873	-0.159631
909.797	43.5	HMDB05473	3	TG(18:2(9Z12Z)18:2(9Z12Z)20:1(11Z))iso3	C59H104O6	M+H	1.37873	-0.159631
909.797	43.5	HMDB49285	3	TG(18:1(11Z)18:1(9Z)20:3(5Z8Z11Z))	C59H104O6	M+H	1.37873	-0.159631
909.797	43.5	HMDB42441	3	TG(14:020:3(5Z8Z11Z)22:2(13Z16Z))	C59H104O6	M+H	1.37873	-0.159631
909.797	43.5	HMDB50459	3	TG(20:1(11Z)16:1(9Z)20:3n6)	C59H104O6	M+H	1.37873	-0.159631
909.797	43.5	HMDB48924	3	TG(16:1(9Z)18:3(9Z12Z15Z)22:1(13Z))	C59H104O6	M+H	1.37873	-0.159631
909.797	43.5	HMDB42237	3	TG(14:022:020:5(5Z8Z11Z14Z17Z))	C59H104O6	M+H	1.37873	-0.159631
909.797	43.5	HMDB05429	3	TG(16:1(9Z)20:020:4(5Z8Z11Z14Z))iso6	C59H104O6	M+H	1.37873	-0.159631
909.797	43.5	HMDB44370	3	TG(16:020:4(5Z8Z11Z14Z)20:1(11Z))	C59H104O6	M+H	1.37873	-0.159631
909.797	43.5	HMDB52546	3	TG(18:2(9Z12Z)18:1(9Z)18:2(9Z12Z))	C59H104O6	M+H	1.37873	-0.159631
909.797	43.5	HMDB49317	3	TG(18:1(11Z)20:1(11Z)18:3(9Z12Z15Z))	C59H104O6	M+H	1.37873	-0.159631
909.797	43.5	HMDB52548	3	TG(18:2(9Z12Z)18:1(9Z)20:2n6)	C59H104O6	M+H	1.37873	-0.159631
909.797	43.5	HMDB44960	3	TG(18:018:1(9Z)20:4(8Z11Z14Z17Z))	C59H104O6	M+H	1.37873	-0.159631
909.797	43.5	HMDB44446	3	TG(16:022:5(4Z7Z10Z13Z16Z)18:0)	C59H104O6	M+H	1.37873	-0.159631
909.797	43.5	HMDB47879	3	TG(14:1(9Z)24:018:4(6Z9Z12Z15Z))	C59H104O6	M+H	1.37873	-0.159631
909.797	43.5	HMDB50476	3	TG(20:1(11Z)18:1(11Z)18:3(6Z9Z12Z))	C59H104O6	M+H	1.37873	-0.159631
909.797	43.5	HMDB44100	3	TG(16:018:1(11Z)22:4(7Z10Z13Z16Z))	C59H104O6	M+H	1.37873	-0.159631
909.797	43.5	HMDB50061	3	TG(18:1(9Z)20:3n618:1(9Z))	C59H104O6	M+H	1.37873	-0.159631
909.797	43.5	HMDB45500	3	TG(20:014:022:5(7Z10Z13Z16Z19Z))	C59H104O6	M+H	1.37873	-0.159631
909.797	43.5	HMDB47830	3	TG(14:1(9Z)20:022:4(7Z10Z13Z16Z))	C59H104O6	M+H	1.37873	-0.159631
909.797	43.5	HMDB48055	3	TG(14:1(9Z)24:1(15Z)18:3(6Z9Z12Z))	C59H104O6	M+H	1.37873	-0.159631
909.797	43.5	HMDB49126	3	TG(18:1(11Z)16:022:4(7Z10Z13Z16Z))	C59H104O6	M+H	1.37873	-0.159631
909.797	43.5	HMDB50483	3	TG(20:1(11Z)18:1(11Z)18:3(9Z12Z15Z))	C59H104O6	M+H	1.37873	-0.159631
909.797	43.5	HMDB48062	3	TG(14:1(9Z)24:1(15Z)18:3(9Z12Z15Z))	C59H104O6	M+H	1.37873	-0.159631
909.797	43.5	HMDB50048	3	TG(18:1(9Z)20:2n620:2n6)	C59H104O6	M+H	1.37873	-0.159631
909.797	43.5	HMDB49310	3	TG(18:1(11Z)20:1(11Z)18:3(6Z9Z12Z))	C59H104O6	M+H	1.37873	-0.159631
909.797	43.5	HMDB48006	3	TG(14:1(9Z)20:3(5Z8Z11Z)22:1(13Z))	C59H104O6	M+H	1.37873	-0.159631
909.797	43.5	HMDB50162	3	TG(18:1(9Z)18:3(9Z12Z15Z)20:1(11Z))	C59H104O6	M+H	1.37873	-0.159631
909.797	43.5	HMDB45349	3	TG(18:020:4(8Z11Z14Z17Z)18:1(11Z))	C59H104O6	M+H	1.37873	-0.159631
909.797	43.5	HMDB46026	3	TG(20:022:4(7Z10Z13Z16Z)14:1(9Z))	C59H104O6	M+H	1.37873	-0.159631
909.797	43.5	HMDB44295	3	TG(16:018:3(6Z9Z12Z)22:2(13Z16Z))	C59H104O6	M+H	1.37873	-0.159631
909.797	43.5	HMDB49410	3	TG(18:1(11Z)18:3(6Z9Z12Z)20:1(11Z))	C59H104O6	M+H	1.37873	-0.159631
909.797	43.5	HMDB54364	3	TG(22:2(13Z16Z)16:018:3(9Z12Z15Z))	C59H104O6	M+H	1.37873	-0.159631
909.797	43.5	HMDB47851	3	TG(14:1(9Z)22:020:4(5Z8Z11Z14Z))	C59H104O6	M+H	1.37873	-0.159631
909.797	43.5	HMDB45187	3	TG(18:020:4(5Z8Z11Z14Z)18:1(11Z))	C59H104O6	M+H	1.37873	-0.159631
909.797	43.5	HMDB05406	3	TG(18:018:1(9Z)20:4(5Z8Z11Z14Z))iso6	C59H104O6	M+H	1.37873	-0.159631
909.797	43.5	HMDB45731	3	TG(20:018:1(11Z)18:4(6Z9Z12Z15Z))	C59H104O6	M+H	1.37873	-0.159631
909.797	43.5	HMDB49291	3	TG(18:1(11Z)18:1(9Z)20:3n6)	C59H104O6	M+H	1.37873	-0.159631
909.797	43.5	HMDB42702	3	TG(14:022:4(7Z10Z13Z16Z)20:1(11Z))	C59H104O6	M+H	1.37873	-0.159631
909.797	43.5	HMDB49145	3	TG(18:1(11Z)18:020:4(5Z8Z11Z14Z))	C59H104O6	M+H	1.37873	-0.159631
909.797	43.5	HMDB50495	3	TG(20:1(11Z)18:1(9Z)18:3(6Z9Z12Z))	C59H104O6	M+H	1.37873	-0.159631
909.797	43.5	HMDB50502	3	TG(20:1(11Z)18:1(9Z)18:3(9Z12Z15Z))	C59H104O6	M+H	1.37873	-0.159631
909.797	43.5	HMDB49324	3	TG(18:1(11Z)20:3(5Z8Z11Z)18:1(11Z))	C59H104O6	M+H	1.37873	-0.159631
909.797	43.5	HMDB42725	3	TG(14:022:5(4Z7Z10Z13Z16Z)20:0)	C59H104O6	M+H	1.37873	-0.159631
909.797	43.5	HMDB48144	3	TG(14:1(9Z)20:3n622:1(13Z))	C59H104O6	M+H	1.37873	-0.159631
909.797	43.5	HMDB44586	3	TG(16:022:5(7Z10Z13Z16Z19Z)18:0)	C59H104O6	M+H	1.37873	-0.159631
909.797	43.5	HMDB44491	3	TG(16:018:3(9Z12Z15Z)22:2(13Z16Z))	C59H104O6	M+H	1.37873	-0.159631
909.797	43.5	HMDB49151	3	TG(18:1(11Z)18:020:4(8Z11Z14Z17Z))	C59H104O6	M+H	1.37873	-0.159631
909.797	43.5	HMDB42673	3	TG(14:022:2(13Z16Z)20:3(5Z8Z11Z))	C59H104O6	M+H	1.37873	-0.159631
909.797	43.5	HMDB45370	3	TG(18:020:5(5Z8Z11Z14Z17Z)18:0)	C59H104O6	M+H	1.37873	-0.159631
909.797	43.5	HMDB48714	3	TG(16:1(9Z)22:1(13Z)18:3(9Z12Z15Z))	C59H104O6	M+H	1.37873	-0.159631
909.797	43.5	HMDB46733	3	TG(22:020:4(5Z8Z11Z14Z)14:1(9Z))	C59H104O6	M+H	1.37873	-0.159631
909.797	43.5	HMDB42679	3	TG(14:022:2(13Z16Z)20:3n6)	C59H104O6	M+H	1.37873	-0.159631
909.797	43.5	HMDB50046	3	TG(18:1(9Z)20:2n618:2(9Z12Z))	C59H104O6	M+H	1.37873	-0.159631
909.797	43.5	HMDB45350	3	TG(18:020:4(8Z11Z14Z17Z)18:1(9Z))	C59H104O6	M+H	1.37873	-0.159631
909.797	43.5	HMDB48770	3	TG(16:1(9Z)18:3(6Z9Z12Z)22:1(13Z))	C59H104O6	M+H	1.37873	-0.159631
909.797	43.5	HMDB44986	3	TG(18:020:1(11Z)18:4(6Z9Z12Z15Z))	C59H104O6	M+H	1.37873	-0.159631
909.797	43.5	HMDB49325	3	TG(18:1(11Z)20:3(5Z8Z11Z)18:1(9Z))	C59H104O6	M+H	1.37873	-0.159631
909.797	43.5	HMDB44128	3	TG(16:018:1(9Z)22:4(7Z10Z13Z16Z))	C59H104O6	M+H	1.37873	-0.159631
909.797	43.5	HMDB46859	3	TG(22:018:4(6Z9Z12Z15Z)16:1(9Z))	C59H104O6	M+H	1.37873	-0.159631
909.797	43.5	HMDB49395	3	TG(18:1(11Z)18:2(9Z12Z)20:2n6)	C59H104O6	M+H	1.37873	-0.159631
909.797	43.5	HMDB48812	3	TG(16:1(9Z)20:3n620:1(11Z))	C59H104O6	M+H	1.37873	-0.159631
909.797	43.5	HMDB48707	3	TG(16:1(9Z)22:1(13Z)18:3(6Z9Z12Z))	C59H104O6	M+H	1.37873	-0.159631
909.797	43.5	HMDB49393	3	TG(18:1(11Z)18:2(9Z12Z)18:2(9Z12Z))	C59H104O6	M+H	1.37873	-0.159631
909.797	43.5	HMDB53394	3	TG(20:2n618:1(9Z)20:2n6)	C59H104O6	M+H	1.37873	-0.159631
909.797	43.5	HMDB48260	3	TG(14:1(9Z)18:3(9Z12Z15Z)24:1(15Z))	C59H104O6	M+H	1.37873	-0.159631
909.797	43.5	HMDB45324	3	TG(18:018:4(6Z9Z12Z15Z)20:1(11Z))	C59H104O6	M+H	1.37873	-0.159631
909.797	43.5	HMDB47857	3	TG(14:1(9Z)22:020:4(8Z11Z14Z17Z))	C59H104O6	M+H	1.37873	-0.159631
909.797	43.5	LMGL03010597	3	1-(9Z-hexadecenoyl)-23-di-(11Z14Z-eicosadienoyl)-sn-glycerol	C59H104O6	M+H	1.37873	-0.159631
909.797	43.5	LMGL03010840	3	1-hexadecanoyl-2-(9Z12Z15Z-octadecatrienoyl)-3-(13Z16Z-docosadienoyl)-sn-glycerol	C59H104O6	M+H	1.37873	-0.159631
909.797	43.5	LMGL03010596	3	12-di-(9Z12Z-octadecadienoyl)-3-(11Z-eicosenoyl)-sn-glycerol	C59H104O6	M+H	1.37873	-0.159631
909.797	43.5	LMGL03014513	3	1-tetradecanoyl-2-(11Z14Z-eicosadienoyl)-3-(10Z13Z16Z-docosatrienoyl)-sn-glycerol	C59H104O6	M+H	1.37873	-0.159631
909.797	43.5	LMGL03015599	3	1-(9Z-pentadecenoyl)-2-nonadecanoyl-3-(7Z10Z13Z16Z-docosatetraenoyl)-sn-glycerol	C59H104O6	M+H	1.37873	-0.159631
909.797	43.5	LMGL03010699	3	12-di-(9Z12Z-heptadecadienoyl)-3-(13Z-docosenoyl)-sn-glycerol	C59H104O6	M+H	1.37873	-0.159631
909.797	43.5	LMGL03014530	3	1-tetradecanoyl-2-(5Z8Z11Z14Z-eicosatetraenoyl)-3-11Z-docosenoyl-sn-glycerol	C59H104O6	M+H	1.37873	-0.159631
909.797	43.5	LMGL03016292	3	1-(9Z12Z-octadecadienoyl)-2-(6Z9Z12Z-octadecatrienoyl)-3-eicosanoyl-sn-glycerol	C59H104O6	M+H	1.37873	-0.159631
909.797	43.5	LMGL03014492	3	1-tetradecanoyl-2-eicosanoyl-3-(7Z10Z13Z16Z19Z-docosapentaenoyl)-sn-glycerol	C59H104O6	M+H	1.37873	-0.159631
909.797	43.5	LMGL03010701	3	1-(9Z-hexadecenoyl)-2-(9Z-octadecenoyl)-3-(10Z13Z16Z-docosatrienoyl)-sn-glycerol	C59H104O6	M+H	1.37873	-0.159631
909.797	43.5	LMGL03014503	3	1-tetradecanoyl-2-(11Z-eicosenoyl)-3-(7Z10Z13Z16Z-docosatetraenoyl)-sn-glycerol	C59H104O6	M+H	1.37873	-0.159631
909.797	43.5	LMGL03010841	3	1-(9Z-hexadecenoyl)-2-(9Z12Z-octadecadienoyl)-3-(13Z16Z-docosadienoyl)-sn-glycerol	C59H104O6	M+H	1.37873	-0.159631
909.797	43.5	LMGL03015262	3	1-pentadecanoyl-2-9Z-nonadecenoyl-3-(7Z10Z13Z16Z-docosatetraenoyl)-sn-glycerol	C59H104O6	M+H	1.37873	-0.159631
909.797	43.5	LMGL03014918	3	1-(9Z-tetradecenoyl)-2-(11Z14Z-eicosadienoyl)-3-(13Z16Z-docosadienoyl)-sn-glycerol	C59H104O6	M+H	1.37873	-0.159631
909.797	43.5	LMGL03014114	3	1-tridecanoyl-2-heneicosanoyl-3-(7Z10Z13Z16Z19Z-docosapentaenoyl)-sn-glycerol	C59H104O6	M+H	1.37873	-0.159631
909.797	43.5	LMGL03015249	3	1-pentadecanoyl-2-nonadecanoyl-3-(7Z10Z13Z16Z19Z-docosapentaenoyl)-sn-glycerol	C59H104O6	M+H	1.37873	-0.159631
909.797	43.5	LMGL03016554	3	1-(6Z9Z12Z15Z-octadecatetraenoyl)-2-nonadecanoyl-3-9Z-nonadecenoyl-sn-glycerol	C59H104O6	M+H	1.37873	-0.159631
909.797	43.5	LMGL03013085	3	1-(9Z12Z15Z-octadecatrienoyl)-23-di9Z-nonadecenoyl-sn-glycerol	C59H104O6	M+H	1.37873	-0.159631
909.797	43.5	LMGL03010710	3	1-heptadecanoyl-2-(9Z-heptadecenoyl)-3-(7Z10Z13Z16Z-docosatetraenoyl)-sn-glycerol	C59H104O6	M+H	1.37873	-0.159631
909.797	43.5	LMGL03010779	3	1-hexadecanoyl-2-octadecanoyl-3-(7Z10Z13Z16Z19Z-docosapentaenoyl)-sn-glycerol	C59H104O6	M+H	1.37873	-0.159631
909.797	43.5	LMGL03013659	3	1-dodecanoyl-2-11Z-docosenoyl-3-(7Z10Z13Z16Z-docosatetraenoyl)-sn-glycerol	C59H104O6	M+H	1.37873	-0.159631
909.797	43.5	LMGL03015320	3	1-pentadecanoyl-2-(5Z8Z11Z14Z17Z-eicosapentaenoyl)-3-heneicosanoyl-sn-glycerol	C59H104O6	M+H	1.37873	-0.159631
909.797	43.5	LMGL03015612	3	1-(9Z-pentadecenoyl)-2-9Z-nonadecenoyl-3-(10Z13Z16Z-docosatrienoyl)-sn-glycerol	C59H104O6	M+H	1.37873	-0.159631
909.797	43.5	LMGL03010603	3	1-hexadecanoyl-2-(11Z14Z-eicosadienoyl)-3-(8Z11Z14Z-eicosatrienoyl)-sn-glycerol	C59H104O6	M+H	1.37873	-0.159631
909.797	43.5	LMGL03016174	3	1-octadecanoyl-2-(6Z9Z12Z15Z-octadecatetraenoyl)-3-(11Z-eicosenoyl)-sn-glycerol	C59H104O6	M+H	1.37873	-0.159631
909.797	43.5	LMGL03010674	3	1-(9Z-heptadecenoyl)-2-nonadecanoyl-3-(5Z8Z11Z14Z-eicosatetraenoyl)-sn-glycerol	C59H104O6	M+H	1.37873	-0.159631
909.797	43.5	LMGL03010776	3	1-(9Z-hexadecenoyl)-2-octadecanoyl-3-(7Z10Z13Z16Z-docosatetraenoyl)-sn-glycerol	C59H104O6	M+H	1.37873	-0.159631
909.797	43.5	LMGL03010713	3	12-diheptadecanoyl-3-(7Z10Z13Z16Z19Z-docosapentaenoyl)-sn-glycerol	C59H104O6	M+H	1.37873	-0.159631
909.797	43.5	LMGL03014897	3	1-(9Z-tetradecenoyl)-2-eicosanoyl-3-(7Z10Z13Z16Z-docosatetraenoyl)-sn-glycerol	C59H104O6	M+H	1.37873	-0.159631
909.797	43.5	LMGL03013016	3	12-di-(9Z12Z-heptadecadienoyl)-3-11Z-docosenoyl-sn-glycerol	C59H104O6	M+H	1.37873	-0.159631
909.797	43.5	LMGL03010668	3	1-(9Z12Z-heptadecadienoyl)-2-nonadecanoyl-3-(8Z11Z14Z-eicosatrienoyl)-sn-glycerol	C59H104O6	M+H	1.37873	-0.159631
909.797	43.5	LMGL03010700	3	1-hexadecanoyl-2-(9Z12Z-octadecadienoyl)-3-(10Z13Z16Z-docosatrienoyl)-sn-glycerol	C59H104O6	M+H	1.37873	-0.159631
909.797	43.5	LMGL03010774	3	1-(9Z-heptadecenoyl)-2-(9Z12Z-heptadecadienoyl)-3-(13Z16Z-docosadienoyl)-sn-glycerol	C59H104O6	M+H	1.37873	-0.159631
909.797	43.5	LMGL03015838	3	1-(9Z-hexadecenoyl)-2-(6Z9Z12Z-octadecatrienoyl)-3-11Z-docosenoyl-sn-glycerol	C59H104O6	M+H	1.37873	-0.159631
909.797	43.5	LMGL03010602	3	1-(9Z-octadecenoyl)-2-(9Z12Z-octadecadienoyl)-3-(11Z14Z-eicosadienoyl)-sn-glycerol	C59H104O6	M+H	1.37873	-0.159631
909.797	43.5	LMGL03014522	3	1-tetradecanoyl-2-(8Z11Z14Z-eicosatrienoyl)-3-(13Z16Z-docosadienoyl)-sn-glycerol	C59H104O6	M+H	1.37873	-0.159631
909.797	43.5	LMGL03010611	3	1-(9Z-hexadecenoyl)-2-eicosanoyl-3-(5Z8Z11Z14Z-eicosatetraenoyl)-sn-glycerol	C59H104O6	M+H	1.37873	-0.159631
909.797	43.5	LMGL03016038	3	1-(9Z-heptadecenoyl)-2-9Z-nonadecenoyl-3-(8Z11Z14Z-eicosatrienoyl)-sn-glycerol	C59H104O6	M+H	1.37873	-0.159631
909.797	43.5	LMGL03010615	3	1-octadecanoyl-2-(9Z-octadecenoyl)-3-(5Z8Z11Z14Z-eicosatetraenoyl)-sn-glycerol	C59H104O6	M+H	1.37873	-0.159631
909.797	43.5	LMGL03014935	3	1-(9Z-tetradecenoyl)-2-(5Z8Z11Z14Z-eicosatetraenoyl)-3-docosanoyl-sn-glycerol	C59H104O6	M+H	1.37873	-0.159631
909.797	43.5	LMGL03014537	3	1-tetradecanoyl-2-(5Z8Z11Z14Z17Z-eicosapentaenoyl)-3-docosanoyl-sn-glycerol	C59H104O6	M+H	1.37873	-0.159631
909.797	43.5	LMGL03014908	3	1-(9Z-tetradecenoyl)-2-(11Z-eicosenoyl)-3-(10Z13Z16Z-docosatrienoyl)-sn-glycerol	C59H104O6	M+H	1.37873	-0.159631
909.797	43.5	LMGL03010775	3	1-hexadecanoyl-2-(9Z-octadecenoyl)-3-(7Z10Z13Z16Z-docosatetraenoyl)-sn-glycerol	C59H104O6	M+H	1.37873	-0.159631
909.797	43.5	LMGL03010680	3	1-heptadecanoyl-2-nonadecanoyl-3-(5Z8Z11Z14Z17Z-eicosapentaenoyl)-sn-glycerol	C59H104O6	M+H	1.37873	-0.159631
909.797	43.5	LMGL03010638	3	1-heptadecanoyl-2-(9Z12Z-heptadecadienoyl)-3-(10Z13Z16Z-docosatrienoyl)-sn-glycerol	C59H104O6	M+H	1.37873	-0.159631
909.797	43.5	LMGL03014927	3	1-(9Z-tetradecenoyl)-2-(8Z11Z14Z-eicosatrienoyl)-3-11Z-docosenoyl-sn-glycerol	C59H104O6	M+H	1.37873	-0.159631
909.797	43.5	LMGL03015956	3	1-heptadecanoyl-2-9Z-nonadecenoyl-3-(5Z8Z11Z14Z-eicosatetraenoyl)-sn-glycerol	C59H104O6	M+H	1.37873	-0.159631
909.797	43.5	LMGL03010608	3	1-octadecanoyl-2-(9Z12Z-octadecadienoyl)-3-(8Z11Z14Z-eicosatrienoyl)-sn-glycerol	C59H104O6	M+H	1.37873	-0.159631
909.797	43.5	LMGL03016244	3	1-(9Z-octadecenoyl)-2-(6Z9Z12Z15Z-octadecatetraenoyl)-3-eicosanoyl-sn-glycerol	C59H104O6	M+H	1.37873	-0.159631
909.797	43.5	LMGL03010616	3	1-hexadecanoyl-2-eicosanoyl-3-(5Z8Z11Z14Z17Z-eicosapentaenoyl)-sn-glycerol	C59H104O6	M+H	1.37873	-0.159631
909.797	43.5	LMGL03010639	3	12-di-(9Z-heptadecenoyl)-3-(10Z13Z16Z-docosatrienoyl)-sn-glycerol	C59H104O6	M+H	1.37873	-0.159631
909.797	43.5	LMGL03016116	3	1-(9Z12Z-heptadecadienoyl)-2-9Z-nonadecenoyl-3-(11Z14Z-eicosadienoyl)-sn-glycerol	C59H104O6	M+H	1.37873	-0.159631
909.797	43.5	LMGL03010762	3	1-(9Z-hexadecenoyl)-2-(9Z12Z15Z-octadecatrienoyl)-3-(13Z-docosenoyl)-sn-glycerol	C59H104O6	M+H	1.37873	-0.159631
909.797	43.5	LMGL03010591	3	1-(9Z12Z-octadecadienoyl)-2-(9Z12Z15Z-octadecatrienoyl)-3-eicosanoyl-sn-glycerol	C59H104O6	M+H	1.37873	-0.159631
909.797	43.5	LMGL03010595	3	1-(9Z-octadecenoyl)-2-(9Z12Z15Z-octadecatrienoyl)-3-(11Z-eicosenoyl)-sn-glycerol	C59H104O6	M+H	1.37873	-0.159631
909.797	43.5	LMGL03013662	3	1-dodecanoyl-2-(13Z16Z-docosadienoyl)-3-(10Z13Z16Z-docosatrienoyl)-sn-glycerol	C59H104O6	M+H	1.37873	-0.159631
909.797	43.5	LMGL03016226	3	1-(9Z-octadecenoyl)-2-(6Z9Z12Z-octadecatrienoyl)-3-(11Z-eicosenoyl)-sn-glycerol	C59H104O6	M+H	1.37873	-0.159631
909.797	43.5	LMGL03016025	3	1-(9Z-heptadecenoyl)-2-(6Z9Z12Z15Z-octadecatetraenoyl)-3-heneicosanoyl-sn-glycerol	C59H104O6	M+H	1.37873	-0.159631
909.797	43.5	LMGL03010604	3	1-(9Z-hexadecenoyl)-2-(11Z-eicosenoyl)-3-(8Z11Z14Z-eicosatrienoyl)-sn-glycerol	C59H104O6	M+H	1.37873	-0.159631
909.797	43.5	LMGL03010610	3	1-hexadecanoyl-2-(11Z-eicosenoyl)-3-(5Z8Z11Z14Z-eicosatetraenoyl)-sn-glycerol	C59H104O6	M+H	1.37873	-0.159631
909.797	43.5	LMGL03015663	3	1-(9Z-pentadecenoyl)-2-(5Z8Z11Z14Z-eicosatetraenoyl)-3-heneicosanoyl-sn-glycerol	C59H104O6	M+H	1.37873	-0.159631
909.797	43.5	LMGL03010601	3	1-octadecanoyl-2-(9Z12Z15Z-octadecatrienoyl)-3-(11Z14Z-eicosadienoyl)-sn-glycerol	C59H104O6	M+H	1.37873	-0.159631
909.797	43.5	LMGL03013655	3	1-dodecanoyl-2-docosanoyl-3-(7Z10Z13Z16Z19Z-docosapentaenoyl)-sn-glycerol	C59H104O6	M+H	1.37873	-0.159631
909.797	43.5	LMGL03010621	3	12-dioctadecanoyl-3-(5Z8Z11Z14Z17Z-eicosapentaenoyl)-sn-glycerol	C59H104O6	M+H	1.37873	-0.159631
909.797	43.5	LMGL03010609	3	12-di-(9Z-octadecenoyl)-3-(8Z11Z14Z-eicosatrienoyl)-sn-glycerol	C59H104O6	M+H	1.37873	-0.159631
909.797	43.5	LMGL03013066	3	1-(6Z9Z12Z-octadecatrienoyl)-23-di9Z-nonadecenoyl-sn-glycerol	C59H104O6	M+H	1.37873	-0.159631
909.797	43.5	LMGL03016156	3	1-octadecanoyl-2-(6Z9Z12Z-octadecatrienoyl)-3-(11Z14Z-eicosadienoyl)-sn-glycerol	C59H104O6	M+H	1.37873	-0.159631
909.797	43.5	LMGL03015856	3	1-(9Z-hexadecenoyl)-2-(6Z9Z12Z15Z-octadecatetraenoyl)-3-docosanoyl-sn-glycerol	C59H104O6	M+H	1.37873	-0.159631
909.797	43.5	LMGL03016085	3	1-(9Z12Z-heptadecadienoyl)-2-(6Z9Z12Z-octadecatrienoyl)-3-heneicosanoyl-sn-glycerol	C59H104O6	M+H	1.37873	-0.159631
909.797	43.5	LMGL03010820	3	1-(9Z12Z-heptadecadienoyl)-2-(9Z12Z15Z-octadecatrienoyl)-3-heneicosanoyl-sn-glycerol	C59H104O6	M+H	1.37873	-0.159631
909.797	43.5	LMGL03015748	3	1-hexadecanoyl-2-(6Z9Z12Z-octadecatrienoyl)-3-(13Z16Z-docosadienoyl)-sn-glycerol	C59H104O6	M+H	1.37873	-0.159631
909.797	43.5	LMGL03015846	3	1-(9Z-hexadecenoyl)-2-(9Z12Z15Z-octadecatrienoyl)-3-11Z-docosenoyl-sn-glycerol	C59H104O6	M+H	1.37873	-0.159631
909.797	43.5	LMGL03015766	3	1-hexadecanoyl-2-(6Z9Z12Z15Z-octadecatetraenoyl)-3-11Z-docosenoyl-sn-glycerol	C59H104O6	M+H	1.37873	-0.159631
875.805	44.8	Multiple matches: Expand group.
875.805	44.8	HMDB43281	3	TG(15:020:1(11Z)18:0)	C56H106O6	M+H	1.36639	-0.158714
875.805	44.8	HMDB43168	3	TG(15:014:1(9Z)24:0)	C56H106O6	M+H	1.36639	-0.158714
875.805	44.8	HMDB44703	3	TG(18:015:020:1(11Z))	C56H106O6	M+H	1.36639	-0.158714
875.805	44.8	HMDB43084	3	TG(15:020:018:1(11Z))	C56H106O6	M+H	1.36639	-0.158714
875.805	44.8	HMDB47030	3	TG(24:015:014:1(9Z))	C56H106O6	M+H	1.36639	-0.158714
875.805	44.8	HMDB43224	3	TG(15:018:1(11Z)20:0)	C56H106O6	M+H	1.36639	-0.158714
875.805	44.8	HMDB42482	3	TG(14:024:1(15Z)15:0)	C56H106O6	M+H	1.36639	-0.158714
875.805	44.8	HMDB45508	3	TG(20:015:018:1(11Z))	C56H106O6	M+H	1.36639	-0.158714
875.805	44.8	HMDB46284	3	TG(22:015:016:1(9Z))	C56H106O6	M+H	1.36639	-0.158714
875.805	44.8	HMDB43030	3	TG(15:016:022:1(13Z))	C56H106O6	M+H	1.36639	-0.158714
875.805	44.8	HMDB43140	3	TG(15:024:014:1(9Z))	C56H106O6	M+H	1.36639	-0.158714
875.805	44.8	HMDB45509	3	TG(20:015:018:1(9Z))	C56H106O6	M+H	1.36639	-0.158714
875.805	44.8	HMDB43112	3	TG(15:022:016:1(9Z))	C56H106O6	M+H	1.36639	-0.158714
875.805	44.8	HMDB43057	3	TG(15:018:020:1(11Z))	C56H106O6	M+H	1.36639	-0.158714
875.805	44.8	HMDB42105	3	TG(14:015:024:1(15Z))	C56H106O6	M+H	1.36639	-0.158714
875.805	44.8	HMDB43085	3	TG(15:020:018:1(9Z))	C56H106O6	M+H	1.36639	-0.158714
875.805	44.8	HMDB43338	3	TG(15:022:1(13Z)16:0)	C56H106O6	M+H	1.36639	-0.158714
875.805	44.8	HMDB43253	3	TG(15:018:1(9Z)20:0)	C56H106O6	M+H	1.36639	-0.158714
875.805	44.8	HMDB43196	3	TG(15:016:1(9Z)22:0)	C56H106O6	M+H	1.36639	-0.158714
875.805	44.8	HMDB42973	3	TG(15:014:024:1(15Z))	C56H106O6	M+H	1.36639	-0.158714
875.805	44.8	HMDB43868	3	TG(16:015:022:1(13Z))	C56H106O6	M+H	1.36639	-0.158714
875.805	44.8	LMGL03013574	3	1-dodecanoyl-2-9Z-nonadecenoyl-3-docosanoyl-sn-glycerol	C56H106O6	M+H	1.36639	-0.158714
875.805	44.8	LMGL03013561	3	1-dodecanoyl-2-nonadecanoyl-3-11Z-docosenoyl-sn-glycerol	C56H106O6	M+H	1.36639	-0.158714
875.805	44.8	LMGL03015133	3	1-pentadecanoyl-2-octadecanoyl-3-(11Z-eicosenoyl)-sn-glycerol	C56H106O6	M+H	1.36639	-0.158714
875.805	44.8	LMGL03014467	3	1-tetradecanoyl-2-9Z-nonadecenoyl-3-eicosanoyl-sn-glycerol	C56H106O6	M+H	1.36639	-0.158714
875.805	44.8	LMGL03015423	3	1-(9Z-pentadecenoyl)-2-heptadecanoyl-3-heneicosanoyl-sn-glycerol	C56H106O6	M+H	1.36639	-0.158714
875.805	44.8	LMGL03010132	3	1-(9Z-hexadecenoyl)-2-heptadecanoyl-3-eicosanoyl-sn-glycerol	C56H106O6	M+H	1.36639	-0.158714
875.805	44.8	LMGL03015483	3	1-(9Z-pentadecenoyl)-2-octadecanoyl-3-eicosanoyl-sn-glycerol	C56H106O6	M+H	1.36639	-0.158714
875.805	44.8	LMGL03014038	3	1-tridecanoyl-2-9Z-nonadecenoyl-3-heneicosanoyl-sn-glycerol	C56H106O6	M+H	1.36639	-0.158714
875.805	44.8	LMGL03010133	3	1-hexadecanoyl-2-heptadecanoyl-3-(11Z-eicosenoyl)-sn-glycerol	C56H106O6	M+H	1.36639	-0.158714
875.805	44.8	LMGL03010131	3	1-hexadecanoyl-2-(9Z-heptadecenoyl)-3-eicosanoyl-sn-glycerol	C56H106O6	M+H	1.36639	-0.158714
875.805	44.8	LMGL03014760	3	1-(9Z-tetradecenoyl)-2-octadecanoyl-3-heneicosanoyl-sn-glycerol	C56H106O6	M+H	1.36639	-0.158714
875.805	44.8	LMGL03012999	3	12-diheptadecanoyl-3-9Z-nonadecenoyl-sn-glycerol	C56H106O6	M+H	1.36639	-0.158714
875.805	44.8	LMGL03015725	3	1-hexadecanoyl-2-octadecanoyl-3-9Z-nonadecenoyl-sn-glycerol	C56H106O6	M+H	1.36639	-0.158714
875.805	44.8	LMGL03010248	3	1-hexadecanoyl-2-(9Z-hexadecenoyl)-3-heneicosanoyl-sn-glycerol	C56H106O6	M+H	1.36639	-0.158714
875.805	44.8	LMGL03013921	3	1-tridecanoyl-2-octadecanoyl-3-11Z-docosenoyl-sn-glycerol	C56H106O6	M+H	1.36639	-0.158714
875.805	44.8	LMGL03015152	3	1-pentadecanoyl-2-(9Z-octadecenoyl)-3-eicosanoyl-sn-glycerol	C56H106O6	M+H	1.36639	-0.158714
875.805	44.8	LMGL03014374	3	1-tetradecanoyl-2-(9Z-octadecenoyl)-3-heneicosanoyl-sn-glycerol	C56H106O6	M+H	1.36639	-0.158714
875.805	44.8	LMGL03010172	3	1-(9Z-hexadecenoyl)-2-octadecanoyl-3-nonadecanoyl-sn-glycerol	C56H106O6	M+H	1.36639	-0.158714
875.805	44.8	LMGL03014859	3	1-(9Z-tetradecenoyl)-2-nonadecanoyl-3-eicosanoyl-sn-glycerol	C56H106O6	M+H	1.36639	-0.158714
875.805	44.8	LMGL03014312	3	1-tetradecanoyl-2-(9Z-heptadecenoyl)-3-docosanoyl-sn-glycerol	C56H106O6	M+H	1.36639	-0.158714
875.805	44.8	LMGL03015095	3	1-pentadecanoyl-2-(9Z-heptadecenoyl)-3-heneicosanoyl-sn-glycerol	C56H106O6	M+H	1.36639	-0.158714
875.805	44.8	LMGL03015236	3	1-pentadecanoyl-2-nonadecanoyl-3-9Z-nonadecenoyl-sn-glycerol	C56H106O6	M+H	1.36639	-0.158714
875.805	44.8	LMGL03010171	3	1-hexadecanoyl-2-(9Z-octadecenoyl)-3-nonadecanoyl-sn-glycerol	C56H106O6	M+H	1.36639	-0.158714
875.805	44.8	LMGL03015025	3	1-pentadecanoyl-2-hexadecanoyl-3-11Z-docosenoyl-sn-glycerol	C56H106O6	M+H	1.36639	-0.158714
875.805	44.8	LMGL03014695	3	1-(9Z-tetradecenoyl)-2-heptadecanoyl-3-docosanoyl-sn-glycerol	C56H106O6	M+H	1.36639	-0.158714
875.805	44.8	LMGL03010119	3	1-heptadecanoyl-2-octadecanoyl-3-(9Z-octadecenoyl)-sn-glycerol	C56H106O6	M+H	1.36639	-0.158714
875.805	44.8	LMGL03013940	3	1-tridecanoyl-2-(9Z-octadecenoyl)-3-docosanoyl-sn-glycerol	C56H106O6	M+H	1.36639	-0.158714
875.805	44.8	LMGL03014290	3	1-tetradecanoyl-2-heptadecanoyl-3-11Z-docosenoyl-sn-glycerol	C56H106O6	M+H	1.36639	-0.158714
875.805	44.8	LMGL03015375	3	1-(9Z-pentadecenoyl)-2-hexadecanoyl-3-docosanoyl-sn-glycerol	C56H106O6	M+H	1.36639	-0.158714
875.805	44.8	LMGL03010151	3	1-heptadecanoyl-2-(9Z-heptadecenoyl)-3-nonadecanoyl-sn-glycerol	C56H106O6	M+H	1.36639	-0.158714
875.805	44.8	LMGL03012965	3	1-(9Z-pentadecenoyl)-23-dinonadecanoyl-sn-glycerol	C56H106O6	M+H	1.36639	-0.158714
875.805	44.8	LMGL03010116	3	1-(9Z-heptadecenoyl)-23-dioctadecanoyl-sn-glycerol	C56H106O6	M+H	1.36639	-0.158714
875.805	44.8	LMGL03013598	3	1-dodecanoyl-2-(11Z-eicosenoyl)-3-heneicosanoyl-sn-glycerol	C56H106O6	M+H	1.36639	-0.158714
875.805	44.8	LMGL03015049	3	1-pentadecanoyl-2-(9Z-hexadecenoyl)-3-docosanoyl-sn-glycerol	C56H106O6	M+H	1.36639	-0.158714
875.805	44.8	LMGL03014046	3	1-tridecanoyl-2-eicosanoyl-3-(11Z-eicosenoyl)-sn-glycerol	C56H106O6	M+H	1.36639	-0.158714
875.805	44.8	LMGL03014454	3	1-tetradecanoyl-2-nonadecanoyl-3-(11Z-eicosenoyl)-sn-glycerol	C56H106O6	M+H	1.36639	-0.158714
841.77	42.6	Multiple matches: Expand group.
841.77	42.6	HMDB54022	3	TG(20:4(5Z8Z11Z14Z)14:0o-18:0)	C55H100O5	M+H	1.36605	-0.158689
841.77	42.6	HMDB42840	3	TG(14:020:4(8Z11Z14Z17Z)o-18:0)	C55H100O5	M+H	1.36605	-0.158689
841.77	42.6	HMDB49066	3	TG(16:1(9Z)o-18:018:3(9Z12Z15Z))	C55H100O5	M+H	1.36605	-0.158689
841.77	42.6	HMDB52970	3	TG(18:3(6Z9Z12Z)16:1(9Z)o-18:0)	C55H100O5	M+H	1.36605	-0.158689
841.77	42.6	HMDB55540	3	TG(20:4(8Z11Z14Z17Z)14:0o-18:0)	C55H100O5	M+H	1.36605	-0.158689
841.77	42.6	HMDB55374	3	TG(18:4(6Z9Z12Z15Z)16:0o-18:0)	C55H100O5	M+H	1.36605	-0.158689
841.77	42.6	HMDB51012	3	TG(20:3(5Z8Z11Z)14:1(9Z)o-18:0)	C55H100O5	M+H	1.36605	-0.158689
841.77	42.6	HMDB48786	3	TG(16:1(9Z)18:3(6Z9Z12Z)o-18:0)	C55H100O5	M+H	1.36605	-0.158689
841.77	42.6	HMDB42660	3	TG(14:020:4(5Z8Z11Z14Z)o-18:0)	C55H100O5	M+H	1.36605	-0.158689
841.77	42.6	HMDB48396	3	TG(14:1(9Z)o-18:020:3(5Z8Z11Z))	C55H100O5	M+H	1.36605	-0.158689
841.77	42.6	HMDB48022	3	TG(14:1(9Z)20:3(5Z8Z11Z)o-18:0)	C55H100O5	M+H	1.36605	-0.158689
841.77	42.6	HMDB44663	3	TG(16:0o-18:018:4(6Z9Z12Z15Z))	C55H100O5	M+H	1.36605	-0.158689
841.77	42.6	HMDB48940	3	TG(16:1(9Z)18:3(9Z12Z15Z)o-18:0)	C55H100O5	M+H	1.36605	-0.158689
841.77	42.6	HMDB48402	3	TG(14:1(9Z)o-18:020:3n6)	C55H100O5	M+H	1.36605	-0.158689
841.77	42.6	HMDB53748	3	TG(20:3n614:1(9Z)o-18:0)	C55H100O5	M+H	1.36605	-0.158689
841.77	42.6	HMDB48160	3	TG(14:1(9Z)20:3n6o-18:0)	C55H100O5	M+H	1.36605	-0.158689
841.77	42.6	HMDB44528	3	TG(16:018:4(6Z9Z12Z15Z)o-18:0)	C55H100O5	M+H	1.36605	-0.158689
841.77	42.6	HMDB55210	3	TG(18:3(9Z12Z15Z)16:1(9Z)o-18:0)	C55H100O5	M+H	1.36605	-0.158689
841.77	42.6	HMDB49059	3	TG(16:1(9Z)o-18:018:3(6Z9Z12Z))	C55H100O5	M+H	1.36605	-0.158689
841.77	42.6	HMDB42956	3	TG(14:0o-18:020:4(8Z11Z14Z17Z))	C55H100O5	M+H	1.36605	-0.158689
841.77	42.6	HMDB42950	3	TG(14:0o-18:020:4(5Z8Z11Z14Z))	C55H100O5	M+H	1.36605	-0.158689
117.102	535.9	HMDB12176	3	5-Aminopentanamide	C5H12N2O	M+H	1.34885	-0.157403
414.301	579.8	Multiple matches: Expand group.
414.301	579.8	LMFA08020110	3	N-(9Z-octadecenoyl)-methionine	C23H43NO3S	M+H	1.33354	0.156252
414.301	579.8	LMFA08020105	3	N-(4Z7Z10Z12E16Z19Z-docosahexaenoyl)-gamma-aminobutyric acid	C26H39NO3	M+H	1.33354	0.156252
300.144	524.8	HMDB29368	3	Saxitoxin	C10H17N7O4	M+H	1.3332	0.156226
131.118	571.3	Multiple matches: Expand group.
131.118	571.3	HMDB60268	3	N-Acetylputrescinium	C6H14N2O	M+H	1.31441	0.154804
131.118	571.3	HMDB02064	3	N-Acetylputrescine	C6H14N2O	M+H	1.31441	0.154804
372.311	71.2	Multiple matches: Expand group.
372.311	71.2	HMDB05066	3	Tetradecanoylcarnitine	C21H41NO4	M+H	1.31351	0.154736
372.311	71.2	LMFA08020102	3	N-octadecanoyl-serine	C21H41NO4	M+H	1.31351	0.154736
372.311	71.2	LMFA07070102	3	3-(tetradecanoyloxy)-4-(trimethylazaniumyl)butanoate	C21H41NO4	M+H	1.31351	0.154736
372.311	71.2	LMFA07070107	3	(3R)-3-(tetradecanoyloxy)-4-(trimethylazaniumyl)butanoate	C21H41NO4	M+H	1.31351	0.154736
288.16	524.1	Multiple matches: Expand group.
288.16	524.1	HMDB15005	3	Ritodrine	C17H21NO3	M+H	1.31349	0.154734
288.16	524.1	HMDB60854	3	Nordihydroisomorphine	C17H21NO3	M+H	1.31349	0.154734
288.16	524.1	HMDB14887	3	Etodolac	C17H21NO3	M+H	1.31349	0.154734
288.16	524.1	HMDB14812	3	Galantamine	C17H21NO3	M+H	1.31349	0.154734
288.16	524.1	HMDB60798	3	6beta-Hydroxy-hydromorphone	C17H21NO3	M+H	1.31349	0.154734
288.16	524.1	HMDB40699	3	Feruperine	C17H21NO3	M+H	1.31349	0.154734
288.16	524.1	HMDB60796	3	6alpha-Hydroxy-hydromorphone	C17H21NO3	M+H	1.31349	0.154734
288.16	524.1	HMDB33874	3	Piperanine	C17H21NO3	M+H	1.31349	0.154734
288.16	524.1	HMDB60548	3	Dihydromorphine	C17H21NO3	M+H	1.31349	0.154734
288.16	524.1	HMDB41956	3	Nordihydrocodeine	C17H21NO3	M+H	1.31349	0.154734
297.147	524.6	Multiple matches: Expand group.
297.147	524.6	HMDB38784	3	(E)-Arachidin II	C19H20O3	M+H	1.31018	0.154483
297.147	524.6	HMDB39071	3	exo-Dehydrochalepin	C19H20O3	M+H	1.31018	0.154483
297.147	524.6	HMDB35220	3	Cryptotanshinone	C19H20O3	M+H	1.31018	0.154483
297.147	524.6	HMDB30599	3	5-(4-Hydroxypheny)ethenyl-2-(3-methyl-1-butenyl)-13-benzenediol	C19H20O3	M+H	1.31018	0.154483
297.147	524.6	HMDB33950	3	Parakmerin A	C19H20O3	M+H	1.31018	0.154483
297.147	524.6	LMPK13090014	3	-	C19H20O3	M+H	1.31018	0.154483
205.126	51.2	Multiple matches: Expand group.
205.126	51.2	HMDB37765	3	(S)-3-Mercaptohexyl butyrate	C10H20O2S	M+H	1.31016	0.154481
205.126	51.2	HMDB38948	3	3-Mercaptohexyl butyrate	C10H20O2S	M+H	1.31016	0.154481
205.126	51.2	HMDB00201	3	L-Acetylcarnitine	C9H17NO4	M+H_[+1]	1.31016	0.154481
205.126	51.2	HMDB32327	3	Hexyl 3-mercaptobutanoate	C10H20O2S	M+H	1.31016	0.154481
205.126	51.2	LMFA07070049	3	(3S)-3-acetoxy-4-(trimethylammonio)butyrate	C9H17NO4	M+H_[+1]	1.31016	0.154481
205.126	51.2	LMFA07070060	3	3-(acetyloxy)-4-(trimethylazaniumyl)butanoate	C9H17NO4	M+H_[+1]	1.31016	0.154481
205.126	51.2	LMFA07070050	3	(3R)-3-acetyloxy-4-(trimethylazaniumyl)butanoate	C9H17NO4	M+H_[+1]	1.31016	0.154481
205.126	51.2	LMFA07010907	3	hexyl 3-sulfanylbutanoate	C10H20O2S	M+H	1.31016	0.154481
152.071	580.1	Multiple matches: Expand group.
152.071	580.1	HMDB01859	3	Acetaminophen	C8H9NO2	M+H	1.30639	-0.154194
152.071	580.1	HMDB60680	3	2-Amino-3-methylbenzoate	C8H9NO2	M+H	1.30639	-0.154194
152.071	580.1	HMDB29703	3	Methyl 2-aminobenzoate	C8H9NO2	M+H	1.30639	-0.154194
152.071	580.1	HMDB33903	3	3alpha477alpha-Tetrahydro-1H-isoindole-13(2H)-dione	C8H9NO2	M+H	1.30639	-0.154194
152.071	580.1	HMDB12219	3	Dopamine quinone	C8H9NO2	M+H	1.30639	-0.154194
152.071	580.1	HMDB12992	3	Leukoaminochrome	C8H9NO2	M+H	1.30639	-0.154194
152.071	580.1	HMDB32609	3	2-(Methylamino)benzoic acid	C8H9NO2	M+H	1.30639	-0.154194
152.071	580.1	HMDB02210	3	2-Phenylglycine	C8H9NO2	M+H	1.30639	-0.154194
152.071	580.1	HMDB59846	3	Ethyl nicotinate	C8H9NO2	M+H	1.30639	-0.154194
407.109	60.5	Multiple matches: Expand group.
407.109	60.5	LMPK12110155	3	-	C23H18O7	M+H	1.30234	0.153885
407.109	60.5	LMPK12060070	3	-	C23H18O7	M+H	1.30234	0.153885
