# Supplementary material for: Plasma acylcarnitine levels increase with healthy aging
Source: Aging (Albany NY). 2020 Jun 16;12(13):13555–70. doi: 10.18632/aging.103462 (PMC7377890; doi:10.18632/aging.103462)
Supplement: Supplementary Table 6 [file aging-12-103462-s004..xlsx]

## Sheet: Supplementary Table 6
Supplementary Table 6. Annotations of metabolites included in female network of metabolome-wide associations with the top 6 age-associated acylcarnitines (Figure 6A). Metabolites are listed by their network cluster. Strength and direction of association with respective acylcarnitines is provided by a correlation value adjacent to the matching acylcarnitine. For multiple annotations per metabolite…
m/z	RT (s)	Cluster	Centrality	Matching acylcarnitine	Correlation	Chemical ID	Schymanksi level of confidence	Name	Formula	Adduct
132.929	57.7	1	0.008	C18OH	0.324192	No annotations available.
166.097	543.5	1	0.087	C20:0	0.402873	No annotations available.
				C18OH	0.397913
170.997	204.1	1	0.008	C18OH	0.300674	Expand group to view annotations.
						HMDB60176	3	(S)-3-Sulfonatolactate	C3H6O6S	M+H
179.013	16.9	1	0.008	C18OH	0.300569	No annotations available.
197.021	312.3	1	0.009	C18OH	0.34194	No annotations available.
227.583	342.4	1	0	C18OH	-0.30701	No annotations available.
230.155	308.6	1	0.058	C20:1	0.381539	Expand group to view annotations.
				C18OH	0.364177
						HMDB39106	3	24-Undecadiene-810-diynoic acid isobutylamide	C15H19NO	M+H
						HMDB33531	3	2468-Decatetraenoic acid dehydropiperidide	C15H19NO	M+H
						LMFA08020192	3	(2E4E)-N-(2-methylpropyl)undeca-24-dien-79-diynamide	C15H19NO	M+H
						HMDB37770	3	Neopellitorine A	C15H19NO	M+H
						LMFA08020164	3	(2E4Z)-N-(2-methylpropyl)undeca-24-dien-810-diynamide	C15H19NO	M+H
234.991	125.2	1	0.008	C18OH	0.33415	No annotations available.
256.17	546.6	1	0	C18OH	-0.36543	Expand group to view annotations.
						HMDB01927	3	Diphenhydramine	C17H21NO	M+H
						HMDB60632	3	N-Demethyl orphenadrine	C17H21NO	M+H
						HMDB14434	3	Atomoxetine	C17H21NO	M+H
273.13	295.2	1	0.075	C20:0	0.342004	Expand group to view annotations.
				C18OH	0.354153
						HMDB33663	3	Decarbamoylneosaxitoxin	C9H16N6O4	M+H
290.295	285	1	0.008	C18OH	0.306853	Expand group to view annotations.
						LMFA11000159	3	13Z6Z9Z-Heneicosatetraene	C21H36	M+H_[+1]
						LMSP01040003	3	heptadecasphinganine	C17H37NO2	M+H_[+2]
						HMDB05943	3	5b-Pregnanediol	C21H36	M+H_[+1]
						HMDB40180	3	Pentadecylbenzene	C21H36	M+H_[+1]
296.086	405.9	1	0.008	C18OH	0.32933	No annotations available.
345.297	509.3	1	0.008	C18OH	0.305265	Expand group to view annotations.
						LMFA01050426	3	3R7R-dihydroxy-eicosanoic acid	C20H40O4	M+H
						HMDB31923	3	1020-Dihydroxyeicosanoic acid	C20H40O4	M+H
						LMFA01050095	3	1112-dihydroxy-eicosanoic acid	C20H40O4	M+H
						LMPR0104010014	3	(3R7R11R15R)-11116-trihydroxy-371115-tetramethylhexadecan-4-one	C20H40O4	M+H
						LMGL01010002	3	1-heptadecanoyl-rac-glycerol	C20H40O4	M+H
347.144	534.4	1	0.108	C20:1	0.307747	No annotations available.
				C18OH	0.380827
				C20:0	0.308134
359.909	64	1	0	C18OH	-0.308768	No annotations available.
387.251	515.7	1	0.009	C18OH	0.343173	Expand group to view annotations.
						LMST04010295	3	312-Dioxo-5beta-chol-14-en-24-oic Acid	C24H34O4	M+H
						LMST04010242	3	7alpha-Hydroxy-3-oxochola-14-dien-24-oic Acid	C24H34O4	M+H
						LMST04010351	3	312-Dioxo-5beta-chol-6-en-24-oic Acid	C24H34O4	M+H
						LMST04010361	3	712-Dioxochol-5-en-24-oic Acid	C24H34O4	M+H
						LMST04010243	3	12alpha-Hydroxy-3-oxochola-14-dien-24-oic Acid	C24H34O4	M+H
						LMST04010360	3	312-Dioxo-5beta-chol-7-en-24-oic Acid	C24H34O4	M+H
						HMDB00385	3	12a-Hydroxy-3-oxocholadienic acid	C24H34O4	M+H
						HMDB12867	3	9-Carboxy-alpha-tocotrienol	C24H34O4	M+H
						LMST04010384	3	3alpha-Hydroxy-12-oxo-5beta-chola-79(11)-dien-24-oic Acid	C24H34O4	M+H
						LMST04010282	3	7beta-Hydroxy-3-oxochola-14-dien-24-oic Acid	C24H34O4	M+H
						LMST04010382	3	312-Dioxo-5beta-chol-8(14)-en-24-oic Acid	C24H34O4	M+H
						LMST04010342	3	(22E)-1alpha3beta-Dihydroxychola-51622-trien-24-oic Acid	C24H34O4	M+H
						LMST04010283	3	6alpha-Hydroxy-3-oxochola-14-dien-24-oic Acid	C24H34O4	M+H
						LMST04010236	3	312-Dioxochol-4-en-24-oic Acid	C24H34O4	M+H
						LMST01130001	3	3beta14beta-dihydroxy-5beta-bufa-2022-dienolide	C24H34O4	M+H
						LMST04010245	3	12alpha-Hydroxy-3-oxochola-46-dien-24-oic Acid	C24H34O4	M+H
						LMST04010277	3	17-Dioxo-5beta-chol-2-en-24-oic Acid	C24H34O4	M+H
421.312	318.7	1	0.023	C18OH	0.369374	No annotations available.
				C10:2	0.337244
						LMST03020390	3	(5Z7E)-(1S3R)-22-(3-methylphenyl)-2324-dinor-910-seco-5710(19)-cholatriene-13-diol	C29H40O2	M+H
495.361	499.8	1	0.008	C18OH	0.303399	Expand group to view annotations.
						LMST03020457	3	(5Z7E)-(1S3R)-2424-difluoro-2627-dimethyl-24a-homo-910-seco-5710(19)-cholestatriene-1325-triol	C30H48F2O3	M+H
565.244	262.9	1	0.009	C18OH	0.357464	No annotations available.
592.835	348	1	0.008	C18OH	0.311525	No annotations available.
602.439	590.2	1	0	C18OH	-0.311005	No annotations available.
605.337	55.3	1	0	C18OH	-0.362169	No annotations available.
606.03	396.3	1	0	C18OH	-0.325675	No annotations available.
651.422	475.1	1	0.008	C18OH	0.321995	Expand group to view annotations.
						LMGP04010161	3	1-(9Z-pentadecenoyl)-2-dodecanoyl-glycero-3-phospho-(1-sn-glycerol)	C33H63O10P	M+H
						LMGP04010110	3	1-(9Z-tetradecenoyl)-2-tridecanoyl-glycero-3-phospho-(1-sn-glycerol)	C33H63O10P	M+H
						LMGP04010048	3	1-dodecanoyl-2-(9Z-pentadecenoyl)-glycero-3-phospho-(1-sn-glycerol)	C33H63O10P	M+H
						LMGP04010070	3	1-tridecanoyl-2-(9Z-tetradecenoyl)-glycero-3-phospho-(1-sn-glycerol)	C33H63O10P	M+H
666.317	458.7	1	0	C18OH	-0.330206	Expand group to view annotations.
						HMDB14964	3	Natamycin	C33H47NO13	M+H
674.927	440.5	1	0.008	C18OH	0.32075	No annotations available.
683.798	40.6	1	0	C18OH	-0.317535	No annotations available.
684.485	504	1	0.008	C18OH	0.334084	No annotations available.
728.521	432.9	1	0	C18OH	-0.352322	Expand group to view annotations.
				C20:1	-0.360524
						LMGP02010573	3	1-(9Z-heptadecenoyl)-2-(9Z12Z-octadecadienoyl)-glycero-3-phosphoethanolamine	C40H74NO8P	M+H
						LMGP01011369	3	1-tetradecanoyl-2-(6Z9Z12Z-octadecatrienoyl)-glycero-3-phosphocholine	C40H74NO8P	M+H
						LMGP02010466	3	1-pentadecanoyl-2-(8Z11Z14Z-eicosatrienoyl)-glycero-3-phosphoethanolamine	C40H74NO8P	M+H
						LMGP01010497	3	1-tetradecanoyl-2-(9Z12Z15Z-octadecatrienoyl)-sn-glycero-3-phosphocholine	C40H74NO8P	M+H
						LMGP01011866	3	1-(8Z11Z14Z-eicosatrienoyl)-2-dodecanoyl-glycero-3-phosphocholine	C40H74NO8P	M+H
						LMGP02010642	3	1-(9Z-octadecenoyl)-2-(9Z12Z-heptadecadienoyl)-glycero-3-phosphoethanolamine	C40H74NO8P	M+H
						LMGP02010547	3	1-heptadecanoyl-2-(6Z9Z12Z-octadecatrienoyl)-glycero-3-phosphoethanolamine	C40H74NO8P	M+H
						LMGP01011441	3	1-(9Z-pentadecenoyl)-2-(9Z12Z-heptadecadienoyl)-glycero-3-phosphocholine	C40H74NO8P	M+H
						LMGP01011673	3	1-(9Z12Z15Z-octadecatrienoyl)-2-tetradecanoyl-glycero-3-phosphocholine	C40H74NO8P	M+H
						HMDB08903	3	PE(15:020:3(8Z11Z14Z))	C40H74NO8P	M+H
						LMGP02010687	3	1-(6Z9Z12Z-octadecatrienoyl)-2-heptadecanoyl-glycero-3-phosphoethanolamine	C40H74NO8P	M+H
						HMDB08196	3	PC(18:3(9Z12Z15Z)14:0)	C40H74NO8P	M+H
						LMGP02010717	3	1-(9Z12Z15Z-octadecatrienoyl)-2-heptadecanoyl-glycero-3-phosphoethanolamine	C40H74NO8P	M+H
						LMGP01011556	3	1-(9Z12Z-heptadecadienoyl)-2-(9Z-pentadecenoyl)-glycero-3-phosphocholine	C40H74NO8P	M+H
						HMDB07875	3	PC(14:018:3(6Z9Z12Z))	C40H74NO8P	M+H
						HMDB07907	3	PC(14:1(9Z)18:2(9Z12Z))	C40H74NO8P	M+H
						LMGP02010495	3	1-(9Z-pentadecenoyl)-2-(11Z14Z-eicosadienoyl)-glycero-3-phosphoethanolamine	C40H74NO8P	M+H
						HMDB08131	3	PC(18:2(9Z12Z)14:1(9Z))	C40H74NO8P	M+H
						HMDB09318	3	PE(20:3(5Z8Z11Z)15:0)	C40H74NO8P	M+H
						HMDB09351	3	PE(20:3(8Z11Z14Z)15:0)	C40H74NO8P	M+H
						LMGP02010661	3	1-(9Z12Z-octadecadienoyl)-2-(9Z-heptadecenoyl)-glycero-3-phosphoethanolamine	C40H74NO8P	M+H
						LMGP01011642	3	1-(6Z9Z12Z-octadecatrienoyl)-2-tetradecanoyl-glycero-3-phosphocholine	C40H74NO8P	M+H
						HMDB08163	3	PC(18:3(6Z9Z12Z)14:0)	C40H74NO8P	M+H
						LMGP02010906	3	1-(8Z11Z14Z-eicosatrienoyl)-2-pentadecanoyl-glycero-3-phosphoethanolamine	C40H74NO8P	M+H
						LMGP01011617	3	1-(9Z12Z-octadecadienoyl)-2-(9Z-tetradecenoyl)-glycero-3-phosphocholine	C40H74NO8P	M+H
						LMGP02010602	3	1-(9Z12Z-heptadecadienoyl)-2-(9Z-octadecenoyl)-glycero-3-phosphoethanolamine	C40H74NO8P	M+H
						LMGP01011391	3	1-(9Z-tetradecenoyl)-2-(9Z12Z-octadecadienoyl)-glycero-3-phosphocholine	C40H74NO8P	M+H
						LMGP01011331	3	1-dodecanoyl-2-(8Z11Z14Z-eicosatrienoyl)-glycero-3-phosphocholine	C40H74NO8P	M+H
						HMDB07876	3	PC(14:018:3(9Z12Z15Z))	C40H74NO8P	M+H
						LMGP02010876	3	1-(11Z14Z-eicosadienoyl)-2-(9Z-pentadecenoyl)-glycero-3-phosphoethanolamine	C40H74NO8P	M+H
						LMGP02010548	3	1-heptadecanoyl-2-(9Z12Z15Z-octadecatrienoyl)-glycero-3-phosphoethanolamine	C40H74NO8P	M+H
						HMDB08902	3	PE(15:020:3(5Z8Z11Z))	C40H74NO8P	M+H
736.514	449.7	1	0.008	C18OH	0.31472	Expand group to view annotations.
						LMGP03010872	3	1-nonadecanoyl-2-tridecanoyl-glycero-3-phosphoserine	C38H74NO10P	M+H
						LMGP03010029	3	12-dihexadecanoyl-sn-glycero-3-phosphoserine	C38H74NO10P	M+H
						LMGP03010915	3	1-pentadecanoyl-2-heptadecanoyl-glycero-3-phosphoserine	C38H74NO10P	M+H
						LMGP03010896	3	1-heptadecanoyl-2-pentadecanoyl-glycero-3-phosphoserine	C38H74NO10P	M+H
						HMDB12374	3	PS(18:014:0)	C38H74NO10P	M+H
						LMGP03010934	3	1-tridecanoyl-2-nonadecanoyl-glycero-3-phosphoserine	C38H74NO10P	M+H
						LMGP03010980	3	1-octadecanoyl-2-tetradecanoyl-glycero-3-phosphoserine	C38H74NO10P	M+H
						LMGP03010928	3	1-tetradecanoyl-2-octadecanoyl-glycero-3-phosphoserine	C38H74NO10P	M+H
						HMDB00614	3	PS(16:016:0)	C38H74NO10P	M+H
						HMDB12334	3	PS(14:018:0)	C38H74NO10P	M+H
						LMGP03010867	3	1-eicosanoyl-2-dodecanoyl-glycero-3-phosphoserine	C38H74NO10P	M+H
						LMGP03010939	3	1-dodecanoyl-2-eicosanoyl-glycero-3-phosphoserine	C38H74NO10P	M+H
756.853	478.1	1	0	C18OH	-0.32813	No annotations available.
				C20:1	-0.300144
833.376	516.4	1	0	C18OH	-0.314978	No annotations available.
833.968	541.1	1	0	C18OH	-0.301455	No annotations available.
834.377	514.7	1	0	C18OH	-0.301828	No annotations available.
858.54	45.6	1	0	C18OH	-0.302234	No annotations available.
883.004	541.7	1	0	C18OH	-0.329691	No annotations available.
924.516	546.7	1	0.008	C18OH	0.303251	No annotations available.
951.842	525.9	1	0	C18OH	-0.321685	Expand group to view annotations.
						LMGL03016270	3	1-(9Z-octadecenoyl)-2-9Z-nonadecenoyl-3-(10Z13Z16Z-docosatrienoyl)-sn-glycerol	C62H110O6	M+H
						LMGL03016398	3	1-(6Z9Z12Z-octadecatrienoyl)-2-nonadecanoyl-3-(13Z16Z-docosadienoyl)-sn-glycerol	C62H110O6	M+H
						LMGL03011406	3	1-(9Z12Z15Z-octadecatrienoyl)-2-(11Z14Z-eicosadienoyl)-3-heneicosanoyl-sn-glycerol	C62H110O6	M+H
						HMDB52916	3	TG(18:3(6Z9Z12Z)22:020:2n6)	C62H110O6	M+H
						LMGL03011261	3	1-(9Z-heptadecenoyl)-2-(5Z8Z11Z14Z-eicosatetraenoyl)-3-docosanoyl-sn-glycerol	C62H110O6	M+H
						LMGL03011404	3	1-(9Z-octadecenoyl)-2-(5Z8Z11Z14Z-eicosatetraenoyl)-3-heneicosanoyl-sn-glycerol	C62H110O6	M+H
						HMDB49440	3	TG(18:1(11Z)20:2n622:2(13Z16Z))	C62H110O6	M+H
						LMGL03015343	3	1-pentadecanoyl-2-11Z-docosenoyl-3-(7Z10Z13Z16Z-docosatetraenoyl)-sn-glycerol	C62H110O6	M+H
						HMDB50051	3	TG(18:1(9Z)20:2n622:2(13Z16Z))	C62H110O6	M+H
						HMDB45933	3	TG(20:020:2n620:3n6)	C62H110O6	M+H
						LMGL03016200	3	1-octadecanoyl-2-9Z-nonadecenoyl-3-(7Z10Z13Z16Z-docosatetraenoyl)-sn-glycerol	C62H110O6	M+H
						HMDB45800	3	TG(20:020:3(5Z8Z11Z)18:2(9Z12Z))	C62H110O6	M+H
						HMDB50108	3	TG(18:1(9Z)22:2(13Z16Z)20:2n6)	C62H110O6	M+H
						HMDB46303	3	TG(22:015:022:5(7Z10Z13Z16Z19Z))	C62H110O6	M+H
						LMGL03012976	3	1-(9Z-pentadecenoyl)-23-di-(13Z16Z-docosadienoyl)-sn-glycerol	C62H110O6	M+H
						LMGL03011204	3	1-(9Z12Z-heptadecadienoyl)-2-eicosanoyl-3-(10Z13Z16Z-docosatrienoyl)-sn-glycerol	C62H110O6	M+H
						HMDB43602	3	TG(15:022:5(4Z7Z10Z13Z16Z)22:0)	C62H110O6	M+H
						LMGL03011358	3	1-(9Z12Z-octadecadienoyl)-2-nonadecanoyl-3-(10Z13Z16Z-docosatrienoyl)-sn-glycerol	C62H110O6	M+H
						LMGL03015339	3	1-pentadecanoyl-2-docosanoyl-3-(7Z10Z13Z16Z19Z-docosapentaenoyl)-sn-glycerol	C62H110O6	M+H
						LMGL03016600	3	1-(6Z9Z12Z15Z-octadecatetraenoyl)-2-(11Z-eicosenoyl)-3-heneicosanoyl-sn-glycerol	C62H110O6	M+H
						HMDB43719	3	TG(15:020:5(5Z8Z11Z14Z17Z)24:0)	C62H110O6	M+H
						HMDB53335	3	TG(20:2n622:018:3(9Z12Z15Z))	C62H110O6	M+H
						LMGL03011249	3	1-nonadecanoyl-2-eicosanoyl-3-(5Z8Z11Z14Z17Z-eicosapentaenoyl)-sn-glycerol	C62H110O6	M+H
						HMDB46298	3	TG(22:015:022:5(4Z7Z10Z13Z16Z))	C62H110O6	M+H
						HMDB51433	3	TG(22:1(13Z)15:022:4(7Z10Z13Z16Z))	C62H110O6	M+H
						HMDB52479	3	TG(18:2(9Z12Z)22:018:3(9Z12Z15Z))	C62H110O6	M+H
						LMGL03011405	3	1-(9Z12Z-octadecadienoyl)-2-(8Z11Z14Z-eicosatrienoyl)-3-heneicosanoyl-sn-glycerol	C62H110O6	M+H
						HMDB52551	3	TG(18:2(9Z12Z)18:1(9Z)22:2(13Z16Z))	C62H110O6	M+H
						LMGL03015693	3	1-(9Z-pentadecenoyl)-2-11Z-docosenoyl-3-(10Z13Z16Z-docosatrienoyl)-sn-glycerol	C62H110O6	M+H
						HMDB50944	3	TG(20:3(5Z8Z11Z)20:018:2(9Z12Z))	C62H110O6	M+H
						LMGL03011270	3	1-(9Z-heptadecenoyl)-2-(8Z11Z14Z-eicosatrienoyl)-3-(13Z-docosenoyl)-sn-glycerol	C62H110O6	M+H
						HMDB43384	3	TG(15:024:1(15Z)20:4(5Z8Z11Z14Z))	C62H110O6	M+H
						LMGL03011596	3	1-(9Z-hexadecenoyl)-2-heneicosanoyl-3-(7Z10Z13Z16Z-docosatetraenoyl)-sn-glycerol	C62H110O6	M+H
						HMDB49398	3	TG(18:1(11Z)18:2(9Z12Z)22:2(13Z16Z))	C62H110O6	M+H
						HMDB45802	3	TG(20:020:3(5Z8Z11Z)20:2n6)	C62H110O6	M+H
						LMGL03011519	3	1-(9Z12Z15Z-octadecatrienoyl)-2-nonadecanoyl-3-(13Z16Z-docosadienoyl)-sn-glycerol	C62H110O6	M+H
						HMDB43747	3	TG(15:022:5(7Z10Z13Z16Z19Z)22:0)	C62H110O6	M+H
						HMDB43390	3	TG(15:024:1(15Z)20:4(8Z11Z14Z17Z))	C62H110O6	M+H
						LMGL03011260	3	1-heptadecanoyl-2-(5Z8Z11Z14Z17Z-eicosapentaenoyl)-3-docosanoyl-sn-glycerol	C62H110O6	M+H
						HMDB50106	3	TG(18:1(9Z)22:2(13Z16Z)18:2(9Z12Z))	C62H110O6	M+H
						LMGL03011262	3	1-(9Z12Z-heptadecadienoyl)-2-(8Z11Z14Z-eicosatrienoyl)-3-docosanoyl-sn-glycerol	C62H110O6	M+H
						LMGL03016052	3	1-(9Z-heptadecenoyl)-2-(8Z11Z14Z-eicosatrienoyl)-3-11Z-docosenoyl-sn-glycerol	C62H110O6	M+H
						LMGL03011403	3	1-octadecanoyl-2-(5Z8Z11Z14Z17Z-eicosapentaenoyl)-3-heneicosanoyl-sn-glycerol	C62H110O6	M+H
						LMGL03011301	3	1-heptadecanoyl-2-eicosanoyl-3-(7Z10Z13Z16Z19Z-docosapentaenoyl)-sn-glycerol	C62H110O6	M+H
						LMGL03016130	3	1-(9Z12Z-heptadecadienoyl)-2-(11Z14Z-eicosadienoyl)-3-11Z-docosenoyl-sn-glycerol	C62H110O6	M+H
						HMDB43581	3	TG(15:022:4(7Z10Z13Z16Z)22:1(13Z))	C62H110O6	M+H
						LMGL03011202	3	1-heptadecanoyl-2-(11Z14Z-eicosadienoyl)-3-(10Z13Z16Z-docosatrienoyl)-sn-glycerol	C62H110O6	M+H
						HMDB52536	3	TG(18:2(9Z12Z)18:1(11Z)22:2(13Z16Z))	C62H110O6	M+H
						HMDB43524	3	TG(15:020:4(5Z8Z11Z14Z)24:1(15Z))	C62H110O6	M+H
						HMDB49500	3	TG(18:1(11Z)22:2(13Z16Z)20:2n6)	C62H110O6	M+H
						HMDB43357	3	TG(15:022:1(13Z)22:4(7Z10Z13Z16Z))	C62H110O6	M+H
						HMDB46642	3	TG(22:018:2(9Z12Z)18:3(6Z9Z12Z))	C62H110O6	M+H
						LMGL03011295	3	1-(9Z-heptadecenoyl)-2-eicosanoyl-3-(7Z10Z13Z16Z-docosatetraenoyl)-sn-glycerol	C62H110O6	M+H
						LMGL03011294	3	1-heptadecanoyl-2-(11Z-eicosenoyl)-3-(7Z10Z13Z16Z-docosatetraenoyl)-sn-glycerol	C62H110O6	M+H
						HMDB45958	3	TG(20:020:3n620:2n6)	C62H110O6	M+H
						HMDB51938	3	TG(24:1(15Z)15:020:4(5Z8Z11Z14Z))	C62H110O6	M+H
						HMDB43126	3	TG(15:022:022:5(4Z7Z10Z13Z16Z))	C62H110O6	M+H
						LMGL03016705	3	1-9Z-nonadecenoyl-2-eicosanoyl-3-(5Z8Z11Z14Z-eicosatetraenoyl)-sn-glycerol	C62H110O6	M+H
						LMGL03011604	3	1-hexadecanoyl-2-heneicosanoyl-3-(7Z10Z13Z16Z19Z-docosapentaenoyl)-sn-glycerol	C62H110O6	M+H
						LMGL03015970	3	1-heptadecanoyl-2-(5Z8Z11Z14Z-eicosatetraenoyl)-3-11Z-docosenoyl-sn-glycerol	C62H110O6	M+H
						LMGL03011242	3	1-nonadecanoyl-2-(11Z-eicosenoyl)-3-(5Z8Z11Z14Z-eicosatetraenoyl)-sn-glycerol	C62H110O6	M+H
						LMGL03011362	3	1-heptadecanoyl-2-(8Z11Z14Z-eicosatrienoyl)-3-(13Z16Z-docosadienoyl)-sn-glycerol	C62H110O6	M+H
						HMDB46699	3	TG(22:020:2n618:3(9Z12Z15Z))	C62H110O6	M+H
						LMGL03011364	3	1-(9Z12Z-heptadecadienoyl)-2-(11Z-eicosenoyl)-3-(13Z16Z-docosadienoyl)-sn-glycerol	C62H110O6	M+H
						HMDB43698	3	TG(15:020:4(8Z11Z14Z17Z)24:1(15Z))	C62H110O6	M+H
						LMGL03016411	3	1-(6Z9Z12Z-octadecatrienoyl)-2-9Z-nonadecenoyl-3-11Z-docosenoyl-sn-glycerol	C62H110O6	M+H
						LMGL03015689	3	1-(9Z-pentadecenoyl)-2-docosanoyl-3-(7Z10Z13Z16Z-docosatetraenoyl)-sn-glycerol	C62H110O6	M+H
						HMDB46843	3	TG(22:018:3(9Z12Z15Z)20:2n6)	C62H110O6	M+H
						HMDB45927	3	TG(20:020:2n620:3(5Z8Z11Z))	C62H110O6	M+H
						HMDB50011	3	TG(18:1(9Z)18:2(9Z12Z)22:2(13Z16Z))	C62H110O6	M+H
						HMDB46692	3	TG(22:020:2n618:3(6Z9Z12Z))	C62H110O6	M+H
						LMGL03011458	3	1-octadecanoyl-2-nonadecanoyl-3-(7Z10Z13Z16Z19Z-docosapentaenoyl)-sn-glycerol	C62H110O6	M+H
						LMGL03011203	3	1-(9Z-heptadecenoyl)-2-(11Z-eicosenoyl)-3-(10Z13Z16Z-docosatrienoyl)-sn-glycerol	C62H110O6	M+H
						LMGL03013139	3	1-9Z-nonadecenoyl-23-di-(11Z14Z-eicosadienoyl)-sn-glycerol	C62H110O6	M+H
						LMGL03016716	3	1-9Z-nonadecenoyl-2-(11Z-eicosenoyl)-3-(8Z11Z14Z-eicosatrienoyl)-sn-glycerol	C62H110O6	M+H
						HMDB43159	3	TG(15:024:020:5(5Z8Z11Z14Z17Z))	C62H110O6	M+H
						HMDB46668	3	TG(22:018:3(6Z9Z12Z)20:2n6)	C62H110O6	M+H
						HMDB53397	3	TG(20:2n618:1(9Z)22:2(13Z16Z))	C62H110O6	M+H
						HMDB53317	3	TG(20:2n620:020:3n6)	C62H110O6	M+H
						HMDB46841	3	TG(22:018:3(9Z12Z15Z)18:2(9Z12Z))	C62H110O6	M+H
						HMDB51944	3	TG(24:1(15Z)15:020:4(8Z11Z14Z17Z))	C62H110O6	M+H
						LMGL03016336	3	1-(9Z12Z-octadecadienoyl)-2-9Z-nonadecenoyl-3-(13Z16Z-docosadienoyl)-sn-glycerol	C62H110O6	M+H
						HMDB46649	3	TG(22:018:2(9Z12Z)18:3(9Z12Z15Z))	C62H110O6	M+H
						HMDB50946	3	TG(20:3(5Z8Z11Z)20:020:2n6)	C62H110O6	M+H
						HMDB45875	3	TG(20:018:2(9Z12Z)20:3(5Z8Z11Z))	C62H110O6	M+H
						LMGL03016534	3	1-(9Z12Z15Z-octadecatrienoyl)-2-9Z-nonadecenoyl-3-11Z-docosenoyl-sn-glycerol	C62H110O6	M+H
						HMDB49498	3	TG(18:1(11Z)22:2(13Z16Z)18:2(9Z12Z))	C62H110O6	M+H
						LMGL03015346	3	1-pentadecanoyl-2-(13Z16Z-docosadienoyl)-3-(10Z13Z16Z-docosatrienoyl)-sn-glycerol	C62H110O6	M+H
						HMDB46666	3	TG(22:018:3(6Z9Z12Z)18:2(9Z12Z))	C62H110O6	M+H
						HMDB45956	3	TG(20:020:3n618:2(9Z12Z))	C62H110O6	M+H
						LMGL03011363	3	1-(9Z-heptadecenoyl)-2-(11Z14Z-eicosadienoyl)-3-(13Z16Z-docosadienoyl)-sn-glycerol	C62H110O6	M+H
						LMGL03016445	3	1-(6Z9Z12Z-octadecatrienoyl)-2-(11Z14Z-eicosadienoyl)-3-heneicosanoyl-sn-glycerol	C62H110O6	M+H
						LMGL03011271	3	1-(9Z12Z-heptadecadienoyl)-2-(11Z14Z-eicosadienoyl)-3-(13Z-docosenoyl)-sn-glycerol	C62H110O6	M+H
						HMDB43131	3	TG(15:022:022:5(7Z10Z13Z16Z19Z))	C62H110O6	M+H
						LMGL03011237	3	1-nonadecanoyl-2-(11Z14Z-eicosadienoyl)-3-(8Z11Z14Z-eicosatrienoyl)-sn-glycerol	C62H110O6	M+H
						HMDB45881	3	TG(20:018:2(9Z12Z)20:3n6)	C62H110O6	M+H
						HMDB53384	3	TG(20:2n618:1(11Z)22:2(13Z16Z))	C62H110O6	M+H
						HMDB47049	3	TG(24:015:020:5(5Z8Z11Z14Z17Z))	C62H110O6	M+H
						HMDB52459	3	TG(18:2(9Z12Z)20:020:3n6)	C62H110O6	M+H
						LMGL03011451	3	1-(9Z-octadecenoyl)-2-nonadecanoyl-3-(7Z10Z13Z16Z-docosatetraenoyl)-sn-glycerol	C62H110O6	M+H
						LMGL03016563	3	1-(6Z9Z12Z15Z-octadecatetraenoyl)-2-nonadecanoyl-3-11Z-docosenoyl-sn-glycerol	C62H110O6	M+H
						HMDB52472	3	TG(18:2(9Z12Z)22:018:3(6Z9Z12Z))	C62H110O6	M+H
						LMGL03011269	3	1-heptadecanoyl-2-(5Z8Z11Z14Z-eicosatetraenoyl)-3-(13Z-docosenoyl)-sn-glycerol	C62H110O6	M+H
						LMGL03016576	3	1-(6Z9Z12Z15Z-octadecatetraenoyl)-2-9Z-nonadecenoyl-3-docosanoyl-sn-glycerol	C62H110O6	M+H
954.399	444.4	1	0	C18OH	-0.328255	No annotations available.
967.449	510.4	1	0	C20:0	-0.32015	No annotations available.
				C18OH	-0.314195
987.265	494	1	0.008	C18OH	0.302575	No annotations available.
1000.21	455.3	1	0	C20:1	-0.386863	No annotations available.
				C20:0	-0.352756
				C18OH	-0.30933
1024.73	486.4	1	0.009	C18OH	0.34714	No annotations available.
1030.85	529.2	1	0	C18OH	-0.415732	No annotations available.
1038.99	592.3	1	0	C20:0	-0.332056	No annotations available.
				C18OH	-0.30451
1055.74	488.3	1	0.067	C20:0	0.304808	No annotations available.
				C18OH	0.336673
1107.18	271	1	0.008	C18OH	0.313443	No annotations available.
1145.83	481.1	1	0.051	C20:1	0.335131	No annotations available.
				C18OH	0.33857
1180.77	38.3	1	0.008	C18OH	0.327642	No annotations available.
1183.77	439	1	0.008	C18OH	0.335714	Expand group to view annotations.
						HMDB11916	3	Ganglioside GM3 (d18:018:0)	C59H110N2O21	M+H
1203.32	484.8	1	0.009	C18OH	0.358238	No annotations available.
1218.48	285.8	1	0	C18OH	-0.303995	No annotations available.
1236.14	473.8	1	0.022	C18OH	0.382227	No annotations available.
				C10:2	0.30661
1245.58	531.5	1	0.009	C18OH	0.34542	Expand group to view annotations.
						HMDB39479	3	Acetylsoyasaponin A3	C60H92O27	M+H
1269.5	297.3	1	0	C18OH	-0.346542	No annotations available.
1276.23	30.2	1	0.016	C18OH	0.358317	No annotations available.
				C20:2	0.324455
1304.24	34	1	0.008	C18OH	0.312504	No annotations available.
1319.94	447	1	0.008	C18OH	0.318311	No annotations available.
1321.39	423.7	1	0.008	C18OH	0.329111	No annotations available.
1323.67	278.2	1	0	C18OH	-0.312075	No annotations available.
1334.21	279.9	1	0.008	C18OH	0.301887	No annotations available.
1359.31	279.3	1	0	C18OH	-0.345566	No annotations available.
1368.34	273.6	1	0.008	C18OH	0.318756	No annotations available.
1368.69	537.7	1	0.008	C18OH	0.311576	No annotations available.
1389.69	39.2	1	0	C18OH	-0.32661	No annotations available.
1426.64	280.6	1	0	C18OH	-0.301046	No annotations available.
1441.45	31.2	1	0	C18OH	-0.316262	No annotations available.
1457.06	274.5	1	0.047	C18OH	0.318185	No annotations available.
				C20:1	0.309327
1497.87	272	1	0	C18OH	-0.301006	No annotations available.
1569.7	286.6	1	0.008	C18OH	0.329044	Expand group to view annotations.
						HMDB36275	3	Quillaic acid 3-galactosyl-(1-2)-xylosyl-(1-3)-glucuronide 28-xylosyl-(1-4)-rhamnosyl-(1-2)-rhamnosyl-(1-3)-4-acetyl-fucosyl ester	C72H112O37	M+H
1570.34	276.6	1	0	C18OH	-0.41482	No annotations available.
1620.19	485.6	1	0.009	C18OH	0.361931	No annotations available.
1843.68	368.8	1	0.009	C18OH	0.340636	No annotations available.
217.159	574.2	1	0.01	C18OH	0.378146	Expand group to view annotations.
						LMPR0103650002	3	-	C15H20O	M+H
						LMPR0103170001	3	-	C15H20O	M+H
						HMDB59863	3	110-Oxidocalamenene	C15H20O	M+H
						HMDB38147	3	Isogermafurene	C15H20O	M+H
						HMDB36108	3	13511-Bisabolatetraen-10-one	C15H20O	M+H
						HMDB35965	3	5beta-137(11)-Eudesmatrien-8-one	C15H20O	M+H
						HMDB36769	3	Furanodiene	C15H20O	M+H
						LMPR0103360001	3	-	C15H20O	M+H
						LMPR0103630001	3	-	C15H20O	M+H
						HMDB31736	3	2-Hexyl-3-phenyl-2-propenal	C15H20O	M+H
						HMDB35612	3	(R)-ar-Turmerone	C15H20O	M+H
						LMPR0103150001	3	-	C15H20O	M+H
						HMDB36589	3	12-Dehydro-alpha-cyperone	C15H20O	M+H
						LMPR0103630002	3	-	C15H20O	M+H
358.295	62.1	1	0.008	C18OH	0.326074	Expand group to view annotations.
						LMFA08020107	3	N-hexadecanoyl-threonine	C20H39NO4	M+H
373.314	65.9	1	0.008	C18OH	0.309085	No annotations available.
521.028	67.1	1	0	C20:1	-0.307607	No annotations available.
				C18OH	-0.318759
620.311	50.7	1	0	C18OH	-0.309058	No annotations available.
125.218	106.3	2	0.06	C20:0	0.313868	No annotations available.
131.053	48.1	2	0.059	C20:0	0.306177	Expand group to view annotations.
						HMDB31370	3	2-(Methylthio)methyl-2-butenal	C6H10OS	M+H
						HMDB37493	3	S-2-Propenyl propanethioate	C6H10OS	M+H
						HMDB40238	3	2-Ethyldihydro-3(2H)-thiophenone	C6H10OS	M+H
134.539	258.6	2	0.066	C20:0	0.344686	No annotations available.
139.934	133.2	2	0.118	C20:0	0.396257	No annotations available.
				C20:1	0.325928
157.973	507.3	2	0.059	C20:0	0.307004	No annotations available.
175.06	311.6	2	0.062	C20:0	0.324157	Expand group to view annotations.
						LMFA01170069	3	3-oxoheptanedioic acid	C7H10O5	M+H
						HMDB61388	3	Dimethyl 2-oxoglutarate	C7H10O5	M+H
						HMDB12149	3	2-Isopropyl-3-oxosuccinate	C7H10O5	M+H
						HMDB03070	3	Shikimic acid	C7H10O5	M+H
						LMFA01050242	3	67-dihydroxy-4-oxo-2-heptenoic acid	C7H10O5	M+H
183.886	467.4	2	0.078	C20:0	0.407839	No annotations available.
193.052	46.6	2	0	C20:0	-0.358576	No annotations available.
208.57	424.3	2	0.072	C20:0	0.373622	No annotations available.
215.088	538	2	0.075	C20:0	0.39179	No annotations available.
253.05	237.4	2	0	C20:0	-0.300513	No annotations available.
255.112	66.3	2	0.063	C20:0	0.329845	Expand group to view annotations.
						HMDB60676	3	10-Hydroxycarbazepine	C15H14N2O2	M+H
						HMDB60701	3	(R)-MHD	C15H14N2O2	M+H
						HMDB60702	3	(S)-MHD	C15H14N2O2	M+H
						HMDB15678	3	Nepafenac	C15H14N2O2	M+H
265.163	97.4	2	0	C20:0	-0.302771	Expand group to view annotations.
						HMDB31688	3	Hexyl glucoside	C12H24O6	M+H
278.231	187.6	2	0.064	C20:0	0.331265	No annotations available.
298.201	527.2	2	0.059	C20:0	0.30607	Expand group to view annotations.
						LMFA08030001	3	N-(3-oxododecanoyl) homoserine lactone	C16H27NO4	M+H
						LMFA01120008	3	10-nitro-7E9Z-hexadecadienoic acid	C16H27NO4	M+H
						LMFA01120007	3	7-nitro-7Z9E-hexadecadienoic acid	C16H27NO4	M+H
301.116	491.5	2	0.069	C20:0	0.357273	No annotations available.
318.195	75.3	2	0	C20:0	-0.312196	No annotations available.
334.546	576.4	2	0.066	C20:0	0.342806	No annotations available.
336.893	496.7	2	0.064	C20:0	0.334478	No annotations available.
341.21	104	2	0	C20:0	-0.336947	Expand group to view annotations.
						HMDB40635	3	Piperochromenoic acid	C22H28O3	M+H
						HMDB03033	3	Canrenone	C22H28O3	M+H
						HMDB60574	3	Perindoprilat	C17H28N2O5	M+H
353.215	100.3	2	0	C20:0	-0.315066	No annotations available.
357.083	71.5	2	0.059	C20:0	0.30552	Expand group to view annotations.
						HMDB03841	3	5-Amino-6-(5-phosphoribitylamino)uracil	C9H17N4O9P	M+H
						HMDB41705	3	Caffeic acid 3-O-glucuronide	C15H16O10	M+H
						HMDB41709	3	Caffeoyl C1-glucuronide	C15H16O10	M+H
						HMDB41707	3	Caffeic acid 4-O-glucuronide	C15H16O10	M+H
376.353	532.8	2	0.076	C20:0	0.397981	No annotations available.
378.255	89.4	2	0	C20:0	-0.305763	Expand group to view annotations.
						HMDB41891	3	Famprofazone	C24H31N3O	M+H
383.035	136.3	2	0.059	C20:0	0.309224	No annotations available.
384.201	550.3	2	0.06	C20:0	0.312994	No annotations available.
388.216	95.7	2	0	C20:0	-0.35666	No annotations available.
393.745	98.3	2	0	C20:0	-0.412087	No annotations available.
395.314	554.3	2	0.061	C20:0	0.319207	Expand group to view annotations.
						LMST04010302	3	5beta-Cholane-3alpha7alpha12alpha24-tetrol	C24H42O4	M+H
						LMST04010301	3	5alpha-Cholane-3alpha7alpha12alpha24-tetrol	C24H42O4	M+H
						LMST04010303	3	5beta-Cholane-3alpha7alpha2324-tetrol	C24H42O4	M+H
396.79	55.2	2	0.063	C20:0	0.326532	No annotations available.
397.181	540.8	2	0.064	C20:0	0.334211	Expand group to view annotations.
						LMFA03120012	3	methyl 9-oxo-10R-chloro-1011S-epoxy-12S-hydroxy-5Z7E13Z-prostatrienoate-cyclo812	C21H29ClO5	M+H
						HMDB61092	3	fluticasone 17beta-carboxylic acid	C21H26F2O5	M+H
410.734	83	2	0	C20:0	-0.351474	No annotations available.
415.252	63.1	2	0	C20:0	-0.312811	No annotations available.
418.351	502.4	2	0.064	C20:0	0.334385	No annotations available.
425.212	557.3	2	0.063	C20:0	0.328997	No annotations available.
427.769	98.2	2	0	C20:0	-0.339093	No annotations available.
428.161	246.3	2	0.059	C20:0	0.306274	Expand group to view annotations.
						HMDB34032	3	6-(2-Carboxyethyl)-7-hydroxy-22-dimethyl-4-chromanone glucoside	C20H26O10	M+H_[+1]
						HMDB03556	3	Chitobiose	C15H26N2O12	M+H_[+1]
						HMDB14818	3	Moricizine	C22H25N3O4S	M+H
428.247	493.4	2	0.058	C20:0	0.302037	Expand group to view annotations.
						LMFA08020149	3	N-(15S-hydroxy-5Z8Z11Z13E-eicosatetraenoyl)-taurine	C22H37NO5S	M+H
						HMDB40792	3	Dihydroxyacidissiminol	C25H33NO5	M+H
						LMFA08020150	3	N-(12S-hydroxy-5Z8Z10E14Z-eicosatetraenoyl)-taurine	C22H37NO5S	M+H
434.265	345.7	2	0	C20:0	-0.316023	No annotations available.
439.191	541	2	0.082	C20:0	0.428129	Expand group to view annotations.
						LMFA03120044	3	methyl 7S-acetoxy-9-oxo-10-chloro-12S-hydroxy-5Z10E14Z17Z-prostatetraenoate-cyclo8R12S	C23H31ClO6	M+H
445.226	56.7	2	0	C20:0	-0.321756	Expand group to view annotations.
						LMFA03120018	3	methyl 4R12S-diacetoxy-9-oxo-5Z7E10Z13Z17Z-prostapentaenoate-cyclo812	C25H32O7	M+H
						HMDB30156	3	Austalide J	C25H32O7	M+H
450.16	300.5	2	0	C20:0	-0.333717	No annotations available.
450.252	541.9	2	0.062	C20:0	0.323281	No annotations available.
453.244	535.8	2	0.076	C20:0	0.397381	Expand group to view annotations.
						HMDB15704	3	Tafluprost	C25H34F2O5	M+H
454.255	100.2	2	0	C20:0	-0.34562	Expand group to view annotations.
						LMST01120008	3	3beta12beta14-trihydroxy-5beta-card-20(22)-enolide	C23H34O5	M+ACN+Na
						LMFA03010202	3	methyl 9-oxo-11R-hydroxy-15R-acetoxy-5Z1013E-prostatrienoate	C23H34O5	M+ACN+Na
						HMDB33400	3	Annoglabasin A	C23H34O5	M+ACN+Na
						HMDB40953	3	Tussilagone	C23H34O5	M+ACN+Na
						HMDB14518	3	Treprostinil	C23H34O5	M+ACN+Na
						LMST01120003	3	3beta1416beta-trihydroxy-5beta-card-20(22)-enolide	C23H34O5	M+ACN+Na
						HMDB60731	3	Digoxigenin	C23H34O5	M+ACN+Na
						HMDB13656	3	15-deoxy-delta1214-Prostaglandin J2-2-glycerol ester	C23H34O5	M+ACN+Na
454.76	87	2	0	C20:0	-0.404267	No annotations available.
464.216	72.8	2	0.065	C20:0	0.340039	No annotations available.
468.281	103.1	2	0	C20:0	-0.33181	No annotations available.
479.199	317.1	2	0.058	C20:0	0.300886	No annotations available.
493.238	86.4	2	0	C20:0	-0.312412	Expand group to view annotations.
						HMDB60123	3	rac-56-Epoxy-retinoyl-beta-D-glucuronide	C26H36O9	M+H
498.743	441.1	2	0	C20:0	-0.350623	No annotations available.
517.382	476.1	2	0.085	C20:0	0.44204	No annotations available.
536.465	516.9	2	0.073	C20:0	0.382084	No annotations available.
545.369	89.4	2	0	C20:0	-0.300823	No annotations available.
550.869	111.5	2	0	C20:0	-0.314459	No annotations available.
552.831	592.7	2	0.063	C20:0	0.326329	No annotations available.
557.781	500.9	2	0	C20:0	-0.341798	No annotations available.
558.457	575.7	2	0.058	C20:0	0.302859	No annotations available.
563.381	74.9	2	0	C20:0	-0.337521	No annotations available.
572.81	503.5	2	0	C20:0	-0.329531	No annotations available.
584.485	521.9	2	0.143	C20:1	0.351536	No annotations available.
				C20:0	0.469912
				C18OH	0.301459
584.89	516	2	0.086	C20:0	0.445892	No annotations available.
585.452	440.2	2	0.059	C20:0	0.309693	Expand group to view annotations.
						HMDB41181	3	Hericene C	C37H60O5	M+H
						LMGL02010353	3	1-dodecanoyl-2-(4Z7Z10Z13Z16Z19Z-docosahexaenoyl)-sn-glycerol	C37H60O5	M+H
						HMDB07560	3	DG(20:5(5Z8Z11Z14Z17Z)14:1(9Z)0:0)	C37H60O5	M+H
						HMDB56153	3	DG(14:1n50:020:5n3)	C37H60O5	M+H
						LMGL02010417	3	1-(9Z-tetradecenoyl)-2-(5Z8Z11Z14Z17Z-eicosapentaenoyl)-sn-glycerol	C37H60O5	M+H
						HMDB07056	3	DG(14:1(9Z)20:5(5Z8Z11Z14Z17Z)0:0)	C37H60O5	M+H
590.047	49.7	2	0.069	C20:0	0.361154	No annotations available.
592.359	70.8	2	0	C20:0	-0.330229	No annotations available.
592.387	452.5	2	0.068	C20:0	0.35318	No annotations available.
594.823	497.2	2	0	C20:0	-0.326773	No annotations available.
610.346	81.2	2	0	C20:0	-0.347142	Expand group to view annotations.
						HMDB41368	3	24-Acetyl- 25-cinnamoylvulgaroside	C36H48O8	M+H_[+1]
612.319	53.7	2	0	C20:0	-0.309879	No annotations available.
616.424	92.7	2	0	C20:0	-0.300314	No annotations available.
619.413	497.8	2	0.066	C20:0	0.345107	No annotations available.
625.353	310.7	2	0	C20:0	-0.321114	Expand group to view annotations.
						LMST02030218	3	3-O-(Rhaa1-4Glcb)-3beta-hydroxy-pregna-516-dien-20-one	C33H52O11	M+H
						LMST02030217	3	3-O-(Rhaa1-2Glcb)-3beta-hydroxy-pregna-516-dien-20-one	C33H52O11	M+H
626.32	90.7	2	0	C20:0	-0.333495	No annotations available.
627.317	57.4	2	0	C20:0	-0.31098	Expand group to view annotations.
						HMDB14700	3	Tigecycline	C29H39N5O8	M+ACN+H
						HMDB14622	3	Amikacin	C22H43N5O13	M+ACN+H
						HMDB15032	3	Benzylpenicilloyl Polylysine	C28H46N6O8S	M+H
627.81	489	2	0	C20:0	-0.331178	No annotations available.
634.269	500.7	2	0	C20:0	-0.300426	No annotations available.
634.309	582.8	2	0	C20:0	-0.331496	No annotations available.
639.699	318.4	2	0	C20:0	-0.302649	No annotations available.
642.439	92.3	2	0	C20:0	-0.348427	Expand group to view annotations.
						HMDB35101	3	Lansioside A	C38H61NO8	M+H-H2O
654.372	87.3	2	0	C20:0	-0.311453	Expand group to view annotations.
						LMGP06050023	3	1-(13Z16Z-docosadienoyl)-glycero-3-phospho-(1-myo-inositol)	C31H57O12P	M+H_[+1]
683.843	482.7	2	0	C20:0	-0.319549	No annotations available.
685.922	442.7	2	0.064	C20:0	0.336058	No annotations available.
686.69	513.5	2	0	C20:0	-0.386877	No annotations available.
695.724	509.9	2	0	C20:0	-0.337152	No annotations available.
701.702	511.5	2	0	C20:0	-0.366599	No annotations available.
704.477	98.7	2	0	C20:0	-0.301735	No annotations available.
705.857	479.7	2	0	C20:0	-0.341045	No annotations available.
706.903	564.9	2	0	C20:0	-0.346885	No annotations available.
709.442	60.3	2	0	C20:0	-0.322816	No annotations available.
717.042	507.3	2	0	C20:0	-0.320587	No annotations available.
717.859	546.3	2	0	C20:0	-0.330141	No annotations available.
718.732	503.8	2	0	C20:0	-0.305346	No annotations available.
720.936	419.4	2	0	C20:0	-0.380695	No annotations available.
728.083	305.9	2	0	C20:0	-0.324432	No annotations available.
730.49	94.1	2	0	C20:0	-0.309985	No annotations available.
735.842	481.1	2	0	C20:0	-0.333052	No annotations available.
737.225	480.6	2	0.065	C20:0	0.338768	No annotations available.
739.514	470	2	0.062	C20:0	0.324615	No annotations available.
756.362	453.7	2	0	C20:0	-0.301643	No annotations available.
759.951	413.3	2	0	C20:0	-0.430551	No annotations available.
772.184	514.7	2	0	C20:0	-0.304682	No annotations available.
774.516	95.8	2	0	C20:0	-0.392829	No annotations available.
779.447	356.9	2	0	C20:0	-0.301431	No annotations available.
779.488	471.1	2	0.059	C20:0	0.307774	Expand group to view annotations.
						LMGP04010658	3	1-(5Z8Z11Z14Z17Z-eicosapentaenoyl)-2-(9Z12Z-heptadecadienoyl)-glycero-3-phospho-(1-sn-glycerol)	C43H71O10P	M+H
						LMGP04010822	3	1-(4Z7Z10Z13Z16Z19Z-docosahexaenoyl)-2-(9Z-pentadecenoyl)-glycero-3-phospho-(1-sn-glycerol)	C43H71O10P	M+H
						LMGP04010191	3	1-(9Z-pentadecenoyl)-2-(4Z7Z10Z13Z16Z19Z-docosahexaenoyl)-glycero-3-phospho-(1-sn-glycerol)	C43H71O10P	M+H
						LMGP04010301	3	1-(9Z12Z-heptadecadienoyl)-2-(5Z8Z11Z14Z17Z-eicosapentaenoyl)-glycero-3-phospho-(1-sn-glycerol)	C43H71O10P	M+H
781.77	326.4	2	0	C20:0	-0.306134	No annotations available.
783.396	538.7	2	0	C20:1	-0.316906	No annotations available.
				C20:0	-0.371239
784.358	518.9	2	0	C20:0	-0.357963	No annotations available.
801.067	570.6	2	0	C20:0	-0.329135	No annotations available.
805.744	498.9	2	0	C20:0	-0.300609	No annotations available.
807.41	554	2	0.062	C20:0	0.324144	Expand group to view annotations.
						HMDB38759	3	Licoricesaponin C2	C42H62O15	M+H
810.915	468	2	0	C20:0	-0.374327	No annotations available.
818.546	100.7	2	0	C20:0	-0.407076	No annotations available.
819.547	100.3	2	0	C20:0	-0.350414	No annotations available.
820.323	450.8	2	0	C20:0	-0.311098	No annotations available.
849.936	529.9	2	0	C20:0	-0.332249	No annotations available.
861.609	543	2	0.062	C20:0	0.321287	No annotations available.
862.57	100.4	2	0	C20:0	-0.311012	No annotations available.
879.12	488.7	2	0.058	C20:0	0.301693	No annotations available.
888.637	546.9	2	0.063	C20:0	0.32765	Expand group to view annotations.
						LMSP0501AB11	3	N-(9Z-octadecenoyl)-1-beta-lactosyl-sphing-4-enine	C48H89NO13	M+H
						HMDB04832	3	Galabiosylceramide (d18:19Z-18:1)	C48H89NO13	M+H
						HMDB11592	3	Lactosyceramide (d18:118:1(9Z))	C48H89NO13	M+H
901.18	468.5	2	0	C20:0	-0.357503	Expand group to view annotations.
						LMFA07050353	3	-	C29H43N8O17P3S	M+H
928.934	532.1	2	0	C20:1	-0.352182	No annotations available.
				C20:0	-0.434107
934.501	393.7	2	0	C20:0	-0.328446	No annotations available.
937.992	530.2	2	0	C20:0	-0.31105	No annotations available.
941.142	556.6	2	0.082	C20:0	0.427437	No annotations available.
941.606	107.9	2	0	C20:0	-0.323263	Expand group to view annotations.
						LMGP06010585	3	1-(8Z11Z14Z-eicosatrienoyl)-2-(13Z16Z-docosadienoyl)-glycero-3-phospho-(1-myo-inositol)	C51H89O13P	M+H
						LMGP06010689	3	1-docosanoyl-2-(5Z8Z11Z14Z17Z-eicosapentaenoyl)-glycero-3-phospho-(1-myo-inositol)	C51H89O13P	M+H
						LMGP06010717	3	1-(11Z-docosenoyl)-2-(5Z8Z11Z14Z-eicosatetraenoyl)-glycero-3-phospho-(1-myo-inositol)	C51H89O13P	M+H
						LMGP06010524	3	1-(11Z-eicosenoyl)-2-(7Z10Z13Z16Z-docosatetraenoyl)-glycero-3-phospho-(1-myo-inositol)	C51H89O13P	M+H
						LMGP06010747	3	1-(13Z16Z-docosadienoyl)-2-(8Z11Z14Z-eicosatrienoyl)-glycero-3-phospho-(1-myo-inositol)	C51H89O13P	M+H
						LMGP06010776	3	1-(7Z10Z13Z16Z-docosatetraenoyl)-2-(11Z-eicosenoyl)-glycero-3-phospho-(1-myo-inositol)	C51H89O13P	M+H
						LMGP06010642	3	1-(5Z8Z11Z14Z17Z-eicosapentaenoyl)-2-docosanoyl-glycero-3-phospho-(1-myo-inositol)	C51H89O13P	M+H
						LMGP06010613	3	1-(5Z8Z11Z14Z-eicosatetraenoyl)-2-(11Z-docosenoyl)-glycero-3-phospho-(1-myo-inositol)	C51H89O13P	M+H
941.813	529.7	2	0.069	C20:0	0.358158	No annotations available.
941.846	451.7	2	0	C20:0	-0.347286	Expand group to view annotations.
						HMDB50454	3	TG(20:1(11Z)16:1(9Z)22:1(13Z))	C61H112O6	M+H
						HMDB44928	3	TG(18:018:1(11Z)22:2(13Z16Z))	C61H112O6	M+H
						LMGL03011031	3	1-(9Z12Z-heptadecadienoyl)-2-(11Z-eicosenoyl)-3-heneicosanoyl-sn-glycerol	C61H112O6	M+H
						LMGL03011182	3	1-(9Z12Z15Z-octadecatrienoyl)-2-nonadecanoyl-3-heneicosanoyl-sn-glycerol	C61H112O6	M+H
						HMDB42427	3	TG(14:020:3(5Z8Z11Z)24:0)	C61H112O6	M+H
						HMDB46758	3	TG(22:022:2(13Z16Z)14:1(9Z))	C61H112O6	M+H
						LMGL03016149	3	1-octadecanoyl-2-(9Z12Z-octadecadienoyl)-3-11Z-docosenoyl-sn-glycerol	C61H112O6	M+H
						LMGL03010964	3	1-(9Z-hexadecenoyl)-2-(11Z14Z-eicosadienoyl)-3-docosanoyl-sn-glycerol	C61H112O6	M+H
						LMGL03015331	3	1-pentadecanoyl-2-heneicosanoyl-3-(10Z13Z16Z-docosatrienoyl)-sn-glycerol	C61H112O6	M+H
						HMDB45215	3	TG(18:022:2(13Z16Z)18:1(9Z))	C61H112O6	M+H
						LMGL03014557	3	1-tetradecanoyl-2-11Z-docosenoyl-3-(13Z16Z-docosadienoyl)-sn-glycerol	C61H112O6	M+H
						LMGL03011030	3	1-(9Z-heptadecenoyl)-2-(11Z14Z-eicosadienoyl)-3-heneicosanoyl-sn-glycerol	C61H112O6	M+H
						HMDB45600	3	TG(20:020:018:3(9Z12Z15Z))	C61H112O6	M+H
						HMDB46001	3	TG(20:022:2(13Z16Z)16:1(9Z))	C61H112O6	M+H
						LMGL03014958	3	1-(9Z-tetradecenoyl)-2-docosanoyl-3-(13Z16Z-docosadienoyl)-sn-glycerol	C61H112O6	M+H
						HMDB44168	3	TG(16:020:3(5Z8Z11Z)22:0)	C61H112O6	M+H
						HMDB51936	3	TG(24:1(15Z)15:020:2n6)	C61H112O6	M+H
						HMDB44955	3	TG(18:018:1(9Z)22:2(13Z16Z))	C61H112O6	M+H
						LMGL03016043	3	1-(9Z-heptadecenoyl)-2-9Z-nonadecenoyl-3-11Z-docosenoyl-sn-glycerol	C61H112O6	M+H
						HMDB46075	3	TG(20:018:3(9Z12Z15Z)20:0)	C61H112O6	M+H
						LMGL03010785	3	1-(9Z12Z15Z-octadecatrienoyl)-23-dieicosanoyl-sn-glycerol	C61H112O6	M+H
						HMDB45214	3	TG(18:022:2(13Z16Z)18:1(11Z))	C61H112O6	M+H
						LMGL03011047	3	1-(9Z12Z-heptadecadienoyl)-2-nonadecanoyl-3-(13Z-docosenoyl)-sn-glycerol	C61H112O6	M+H
						HMDB48722	3	TG(16:1(9Z)24:1(15Z)18:1(11Z))	C61H112O6	M+H
						HMDB44011	3	TG(16:024:018:3(6Z9Z12Z))	C61H112O6	M+H
						HMDB43466	3	TG(15:020:2n624:1(15Z))	C61H112O6	M+H
						HMDB42674	3	TG(14:022:2(13Z16Z)22:1(13Z))	C61H112O6	M+H
						LMGL03010975	3	1-octadecanoyl-2-(9Z12Z-octadecadienoyl)-3-(13Z-docosenoyl)-sn-glycerol	C61H112O6	M+H
						LMGL03010979	3	1-heptadecanoyl-2-nonadecanoyl-3-(10Z13Z16Z-docosatrienoyl)-sn-glycerol	C61H112O6	M+H
						HMDB44018	3	TG(16:024:018:3(9Z12Z15Z))	C61H112O6	M+H
						LMGL03011029	3	1-heptadecanoyl-2-(8Z11Z14Z-eicosatrienoyl)-3-heneicosanoyl-sn-glycerol	C61H112O6	M+H
						HMDB45569	3	TG(20:018:020:3n6)	C61H112O6	M+H
						LMGL03013067	3	1-(6Z9Z12Z-octadecatrienoyl)-23-dieicosanoyl-sn-glycerol	C61H112O6	M+H
						HMDB48513	3	TG(16:1(9Z)20:022:2(13Z16Z))	C61H112O6	M+H
						HMDB44398	3	TG(16:022:2(13Z16Z)20:1(11Z))	C61H112O6	M+H
						HMDB50347	3	TG(20:1(11Z)16:022:2(13Z16Z))	C61H112O6	M+H
						HMDB44477	3	TG(16:018:3(9Z12Z15Z)24:0)	C61H112O6	M+H
						LMGL03011062	3	1-octadecanoyl-2-(9Z-octadecenoyl)-3-(13Z16Z-docosadienoyl)-sn-glycerol	C61H112O6	M+H
						HMDB43408	3	TG(15:018:2(9Z12Z)24:1(15Z))	C61H112O6	M+H
						LMGL03014553	3	1-tetradecanoyl-2-docosanoyl-3-(10Z13Z16Z-docosatrienoyl)-sn-glycerol	C61H112O6	M+H
						HMDB47070	3	TG(24:016:018:3(9Z12Z15Z))	C61H112O6	M+H
						HMDB46349	3	TG(22:018:018:3(9Z12Z15Z))	C61H112O6	M+H
						HMDB44791	3	TG(18:020:020:3n6)	C61H112O6	M+H
						LMGL03016121	3	1-(9Z12Z-heptadecadienoyl)-2-9Z-nonadecenoyl-3-docosanoyl-sn-glycerol	C61H112O6	M+H
						LMGL03015961	3	1-heptadecanoyl-2-9Z-nonadecenoyl-3-(13Z16Z-docosadienoyl)-sn-glycerol	C61H112O6	M+H
						HMDB10466	3	TG(18:1(9Z)18:1(9Z)22:1(13Z))iso3	C61H112O6	M+H
						HMDB44823	3	TG(18:022:018:3(9Z12Z15Z))	C61H112O6	M+H
						LMGL03010798	3	1-octadecanoyl-2-eicosanoyl-3-(8Z11Z14Z-eicosatrienoyl)-sn-glycerol	C61H112O6	M+H
						HMDB46342	3	TG(22:018:018:3(6Z9Z12Z))	C61H112O6	M+H
						HMDB48702	3	TG(16:1(9Z)22:1(13Z)20:1(11Z))	C61H112O6	M+H
						LMGL03013032	3	12-di-(9Z-octadecenoyl)-3-11Z-docosenoyl-sn-glycerol	C61H112O6	M+H
						HMDB50436	3	TG(20:1(11Z)14:1(9Z)24:1(15Z))	C61H112O6	M+H
						HMDB42253	3	TG(14:024:020:3(5Z8Z11Z))	C61H112O6	M+H
						LMGL03011135	3	1-(9Z-heptadecenoyl)-2-nonadecanoyl-3-(13Z16Z-docosadienoyl)-sn-glycerol	C61H112O6	M+H
						LMGL03016113	3	1-(9Z12Z-heptadecadienoyl)-2-nonadecanoyl-3-11Z-docosenoyl-sn-glycerol	C61H112O6	M+H
						HMDB44155	3	TG(16:020:1(11Z)22:2(13Z16Z))	C61H112O6	M+H
						HMDB42471	3	TG(14:022:1(13Z)22:2(13Z16Z))	C61H112O6	M+H
						HMDB48639	3	TG(16:1(9Z)18:1(9Z)24:1(15Z))	C61H112O6	M+H
						HMDB50490	3	TG(20:1(11Z)18:1(9Z)20:1(11Z))	C61H112O6	M+H
						LMGL03010971	3	1-(9Z-hexadecenoyl)-2-(11Z-eicosenoyl)-3-(13Z-docosenoyl)-sn-glycerol	C61H112O6	M+H
						LMGL03011058	3	1-(9Z-hexadecenoyl)-2-eicosanoyl-3-(13Z16Z-docosadienoyl)-sn-glycerol	C61H112O6	M+H
						LMGL03011057	3	1-hexadecanoyl-2-(11Z-eicosenoyl)-3-(13Z16Z-docosadienoyl)-sn-glycerol	C61H112O6	M+H
						HMDB45563	3	TG(20:018:020:3(5Z8Z11Z))	C61H112O6	M+H
						HMDB51934	3	TG(24:1(15Z)15:018:2(9Z12Z))	C61H112O6	M+H
						HMDB49771	3	TG(18:1(9Z)18:022:2(13Z16Z))	C61H112O6	M+H
						HMDB50471	3	TG(20:1(11Z)18:1(11Z)20:1(11Z))	C61H112O6	M+H
						HMDB05457	3	TG(18:1(9Z)20:1(11Z)20:1(11Z))iso3	C61H112O6	M+H
						LMGL03015880	3	1-(9Z-hexadecenoyl)-2-(11Z-eicosenoyl)-3-11Z-docosenoyl-sn-glycerol	C61H112O6	M+H
						HMDB45593	3	TG(20:020:018:3(6Z9Z12Z))	C61H112O6	M+H
						HMDB44785	3	TG(18:020:020:3(5Z8Z11Z))	C61H112O6	M+H
						HMDB45102	3	TG(18:018:3(6Z9Z12Z)22:0)	C61H112O6	M+H
						HMDB48723	3	TG(16:1(9Z)24:1(15Z)18:1(9Z))	C61H112O6	M+H
						HMDB49346	3	TG(18:1(11Z)22:1(13Z)18:1(9Z))	C61H112O6	M+H
						HMDB42607	3	TG(14:020:3n624:0)	C61H112O6	M+H
						HMDB44816	3	TG(18:022:018:3(6Z9Z12Z))	C61H112O6	M+H
						HMDB43382	3	TG(15:024:1(15Z)20:2n6)	C61H112O6	M+H
						HMDB43985	3	TG(16:022:020:3n6)	C61H112O6	M+H
						HMDB49265	3	TG(18:1(11Z)18:1(11Z)22:1(13Z))	C61H112O6	M+H
						HMDB47017	3	TG(24:014:020:3n6)	C61H112O6	M+H
						LMGL03010968	3	1-octadecanoyl-2-(9Z12Z15Z-octadecatrienoyl)-3-docosanoyl-sn-glycerol	C61H112O6	M+H
						HMDB45701	3	TG(20:016:1(9Z)22:2(13Z16Z))	C61H112O6	M+H
						HMDB47063	3	TG(24:016:018:3(6Z9Z12Z))	C61H112O6	M+H
						HMDB48050	3	TG(14:1(9Z)24:1(15Z)20:1(11Z))	C61H112O6	M+H
						HMDB46319	3	TG(22:016:020:3n6)	C61H112O6	M+H
						HMDB45155	3	TG(18:020:3n620:0)	C61H112O6	M+H
						LMGL03016395	3	1-(6Z9Z12Z-octadecatrienoyl)-2-nonadecanoyl-3-heneicosanoyl-sn-glycerol	C61H112O6	M+H
						HMDB49345	3	TG(18:1(11Z)22:1(13Z)18:1(11Z))	C61H112O6	M+H
						LMGL03010792	3	1-(9Z-octadecenoyl)-2-eicosanoyl-3-(11Z14Z-eicosadienoyl)-sn-glycerol	C61H112O6	M+H
						LMGL03010910	3	12-dioctadecanoyl-3-(10Z13Z16Z-docosatrienoyl)-sn-glycerol	C61H112O6	M+H
						HMDB49286	3	TG(18:1(11Z)18:1(9Z)22:1(13Z))	C61H112O6	M+H
						HMDB47011	3	TG(24:014:020:3(5Z8Z11Z))	C61H112O6	M+H
						HMDB48617	3	TG(16:1(9Z)18:1(11Z)24:1(15Z))	C61H112O6	M+H
						LMGL03010791	3	1-octadecanoyl-2-(11Z-eicosenoyl)-3-(11Z14Z-eicosadienoyl)-sn-glycerol	C61H112O6	M+H
						LMGL03010969	3	1-(9Z-octadecenoyl)-2-(9Z12Z-octadecadienoyl)-3-docosanoyl-sn-glycerol	C61H112O6	M+H
						LMGL03010976	3	12-di-(9Z-octadecenoyl)-3-(13Z-docosenoyl)-sn-glycerol	C61H112O6	M+H
						HMDB47852	3	TG(14:1(9Z)22:022:2(13Z16Z))	C61H112O6	M+H
						LMGL03015790	3	1-hexadecanoyl-2-(11Z14Z-eicosadienoyl)-3-11Z-docosenoyl-sn-glycerol	C61H112O6	M+H
						LMGL03010963	3	1-hexadecanoyl-2-(8Z11Z14Z-eicosatrienoyl)-3-docosanoyl-sn-glycerol	C61H112O6	M+H
						HMDB46446	3	TG(22:014:1(9Z)22:2(13Z16Z))	C61H112O6	M+H
						HMDB49884	3	TG(18:1(9Z)18:1(11Z)22:1(13Z))	C61H112O6	M+H
						HMDB48660	3	TG(16:1(9Z)20:1(11Z)22:1(13Z))	C61H112O6	M+H
						LMGL03010970	3	1-hexadecanoyl-2-(11Z14Z-eicosadienoyl)-3-(13Z-docosenoyl)-sn-glycerol	C61H112O6	M+H
						HMDB47984	3	TG(14:1(9Z)20:1(11Z)24:1(15Z))	C61H112O6	M+H
						HMDB51527	3	TG(22:1(13Z)14:1(9Z)22:1(13Z))	C61H112O6	M+H
						HMDB49146	3	TG(18:1(11Z)18:022:2(13Z16Z))	C61H112O6	M+H
						HMDB43380	3	TG(15:024:1(15Z)18:2(9Z12Z))	C61H112O6	M+H
						LMGL03015681	3	1-(9Z-pentadecenoyl)-2-heneicosanoyl-3-(13Z16Z-docosadienoyl)-sn-glycerol	C61H112O6	M+H
						HMDB44993	3	TG(18:020:3(5Z8Z11Z)20:0)	C61H112O6	M+H
						LMGL03010788	3	1-(9Z12Z-octadecadienoyl)-2-eicosanoyl-3-(11Z-eicosenoyl)-sn-glycerol	C61H112O6	M+H
						LMGL03011012	3	12-dinonadecanoyl-3-(8Z11Z14Z-eicosatrienoyl)-sn-glycerol	C61H112O6	M+H
						HMDB45893	3	TG(20:018:3(6Z9Z12Z)20:0)	C61H112O6	M+H
						HMDB49245	3	TG(18:1(11Z)16:1(9Z)24:1(15Z))	C61H112O6	M+H
						LMGL03016676	3	1-nonadecanoyl-2-9Z-nonadecenoyl-3-(11Z14Z-eicosadienoyl)-sn-glycerol	C61H112O6	M+H
						LMGL03012865	3	1-(9Z-tetradecenoyl)-23-di11Z-docosenoyl-sn-glycerol	C61H112O6	M+H
						LMGL03010905	3	1-hexadecanoyl-2-eicosanoyl-3-(10Z13Z16Z-docosatrienoyl)-sn-glycerol	C61H112O6	M+H
						HMDB44336	3	TG(16:020:3n622:0)	C61H112O6	M+H
						LMGL03016333	3	1-(9Z12Z-octadecadienoyl)-2-9Z-nonadecenoyl-3-heneicosanoyl-sn-glycerol	C61H112O6	M+H
						HMDB45291	3	TG(18:018:3(9Z12Z15Z)22:0)	C61H112O6	M+H
						HMDB51415	3	TG(22:1(13Z)14:022:2(13Z16Z))	C61H112O6	M+H
						HMDB05468	3	TG(18:2(9Z12Z)20:020:1(11Z))iso6	C61H112O6	M+H
						HMDB49961	3	TG(18:1(9Z)22:1(13Z)18:1(9Z))	C61H112O6	M+H
						LMGL03010787	3	1-(9Z-octadecenoyl)-23-di-(11Z-eicosenoyl)-sn-glycerol	C61H112O6	M+H
						HMDB43979	3	TG(16:022:020:3(5Z8Z11Z))	C61H112O6	M+H
						HMDB42259	3	TG(14:024:020:3n6)	C61H112O6	M+H
						HMDB49305	3	TG(18:1(11Z)20:1(11Z)20:1(11Z))	C61H112O6	M+H
						LMGL03016161	3	1-octadecanoyl-2-(6Z9Z12Z-octadecatrienoyl)-3-docosanoyl-sn-glycerol	C61H112O6	M+H
						HMDB48029	3	TG(14:1(9Z)22:1(13Z)22:1(13Z))	C61H112O6	M+H
						HMDB46313	3	TG(22:016:020:3(5Z8Z11Z))	C61H112O6	M+H
						HMDB49865	3	TG(18:1(9Z)16:1(9Z)24:1(15Z))	C61H112O6	M+H
						LMGL03013124	3	12-di9Z-nonadecenoyl-3-(11Z-eicosenoyl)-sn-glycerol	C61H112O6	M+H
						HMDB44281	3	TG(16:018:3(6Z9Z12Z)24:0)	C61H112O6	M+H
948.461	554.4	2	0.058	C20:0	0.300105	No annotations available.
953.397	447.5	2	0	C20:0	-0.424418	No annotations available.
961.541	340.2	2	0	C20:0	-0.312487	Expand group to view annotations.
						HMDB34351	3	Ginsenoside III	C48H80O19	M+H
						HMDB30902	3	Notoginsenoside G	C48H80O19	M+H
977.527	93.3	2	0	C20:0	-0.366292	Expand group to view annotations.
						HMDB35344	3	(3b16a20R)-316202225-Pentahydroxy-5-cucurbiten-11-one 3-rhamnosyl-(1-4)-glucosyl-(1-6)-glucoside	C48H80O20	M+H
994.976	513.2	2	0	C20:0	-0.310779	No annotations available.
997.894	442.9	2	0	C20:0	-0.328837	No annotations available.
1010.45	510.9	2	0	C20:0	-0.403529	No annotations available.
1035.72	487.9	2	0.059	C20:0	0.307792	No annotations available.
1050.74	580.9	2	0.067	C20:0	0.35095	Expand group to view annotations.
						LMGP00000060	3	-	C59H104NO12P	M+H
1069.57	587	2	0	C20:0	-0.377912	No annotations available.
1124.1	489.8	2	0	C20:0	-0.312568	No annotations available.
1136.81	489.3	2	0.065	C20:0	0.339974	Expand group to view annotations.
						LMSP0502AA05	3	Galalpha1-4Galbeta1-4Glcbeta-Cer(d18:124:0)	C60H113NO18	M+H
						HMDB04886	3	Trihexosylceramide (d18:124:0)	C60H113NO18	M+H
						LMSP0507AA05	3	Manalpha1-3Manbeta1-4Glcbeta-Cer(d18:124:0)	C60H113NO18	M+H
						LMSP0505CZ05	3	Galalpha1-3Galbeta1-4Glcbeta-Cer(d18:124:0)	C60H113NO18	M+H
1176.11	485.6	2	0	C20:0	-0.314062	No annotations available.
1204.78	456.7	2	0.062	C20:0	0.320913	No annotations available.
1217.66	36.4	2	0.058	C20:0	0.30029	No annotations available.
1221.05	270.7	2	0.067	C20:0	0.34707	No annotations available.
1245.55	498.1	2	0	C20:0	-0.341034	Expand group to view annotations.
						LMGP15040028	3	2-O-(alpha-D-Manp)-6-O-(alpha-D-Manp-1-6-alpha-D-Manp-1-6-alpha-D-Manp)-(1-(9Z-octadecenoyl)-sn-glycero-3-phospho-1-myo-inositol)	C52H93O31P	M+H
1258.66	485.4	2	0	C20:0	-0.399814	No annotations available.
1278.8	402.5	2	0.06	C20:0	0.310542	No annotations available.
1284.66	494.7	2	0.059	C20:0	0.307199	No annotations available.
1370.75	478.9	2	0	C20:0	-0.302555	No annotations available.
1375.79	32.7	2	0	C20:0	-0.375875	No annotations available.
1403.72	276.7	2	0	C20:0	-0.316518	No annotations available.
1435.31	280.1	2	0	C20:0	-0.342842	No annotations available.
1478.74	278.9	2	0	C20:0	-0.352634	No annotations available.
1481.75	276.7	2	0	C20:0	-0.301727	No annotations available.
1503.67	272.7	2	0	C20:0	-0.301411	No annotations available.
1545.42	268.6	2	0	C20:0	-0.315573	No annotations available.
1552.27	274	2	0.063	C20:0	0.329628	No annotations available.
1563.89	281.6	2	0.063	C20:0	0.328392	Expand group to view annotations.
						LMSP0502AI02	3	Fucalpha1-2Galbeta1-3GalNAcbeta1-3Galalpha1-4Galbeta1-4Glcbeta-Cer(d18:118:0)	C74H134N2O32	M+H
						LMSP0502BM02	3	Fucalpha2-3Galbeta1-3GalNAcbeta1-4Galalpha1-4Galbeta1-4Glcbeta-Cer(d18:118:0)	C74H134N2O32	M+H
						LMSP0504AE02	3	Galalpha1-3(Fucalpha1-2)Galbeta1-3GlcNAcbeta1-3Galbeta1-4Glcbeta-Cer(d18:118:0)	C74H134N2O32	M+H
						LMSP0505CV02	3	Galalpha1-3Galbeta1-4(Fucalpha1-3)GlcNAcbeta1-3Galbeta1-4Glcbeta-Cer(d18:118:0)	C74H134N2O32	M+H
						LMSP0505AE02	3	Galalpha1-3(Fucalpha1-2)Galbeta1-4GlcNAcbeta1-3Galbeta1-4Glcbeta-Cer(d18:118:0)	C74H134N2O32	M+H
						LMSP0505DF02	3	Galbeta1-4(Fucalpha1-3)GlcNAcbeta1-3Galalpha1-3Galbeta1-4Glcbeta-Cer(d18:118:0)	C74H134N2O32	M+H
						LMSP0505DK02	3	Fucalpha1-2Galbeta1-3GalNAcbeta1-3Galalpha1-3Galbeta1-4Glcbeta-Cer(d18:118:0)	C74H134N2O32	M+H
						LMSP0503AK02	3	Galalpha1-3(Fucalpha1-2)Galbeta1-3GalNAcbeta1-4Galbeta1-4Glcbeta-Cer(d18:118:0)	C74H134N2O32	M+H
1570.89	284.4	2	0	C20:0	-0.3022	Expand group to view annotations.
						HMDB12938	3	Dynorphin B	C74H115N21O17	M+H
1582.27	279.7	2	0	C20:0	-0.313838	No annotations available.
1594.55	270	2	0.061	C20:0	0.315274	No annotations available.
1597.92	285.2	2	0	C20:0	-0.302566	No annotations available.
1726.18	297.5	2	0	C20:0	-0.302488	No annotations available.
194.154	579.3	2	0.058	C20:0	0.300095	Expand group to view annotations.
						HMDB32210	3	N-Cyclopropyl-trans-2-cis-6-nonadienamide	C12H19NO	M+H
						LMFA08020191	3	(2E6Z)-N-cyclopropylnona-26-dienamide	C12H19NO	M+H
228.158	25.6	2	0	C20:0	-0.345998	No annotations available.
300.142	105.2	2	0.058	C20:0	0.300766	Expand group to view annotations.
						HMDB29368	3	Saxitoxin	C10H17N7O4	M+H
318.812	23.8	2	0	C20:0	-0.300761	No annotations available.
605.396	69.1	2	0	C20:0	-0.411999	No annotations available.
608.249	81.1	2	0	C20:0	-0.301068	No annotations available.
716.393	51.3	2	0	C20:0	-0.342456	No annotations available.
740.891	125.4	2	0	C20:0	-0.309555	No annotations available.
156.093	505.7	3	0.031	C10:2	0.331162	No annotations available.
				C10:3	0.326856
206.102	492	3	0.033	C10:2	0.365272	Expand group to view annotations.
				C10:3	0.342187
						HMDB40337	3	Dihydro-46-dimethyl-2-(1-methylpropyl)-4H-135-dithiazine	C9H19NS2	M+H
						HMDB40334	3	Dihydro-24-dimethyl-6-(2-methylpropyl)-4H-135-dithiazine	C9H19NS2	M+H
						HMDB36394	3	N-Methylcalystegine C1	C8H15NO5	M+H
						HMDB40335	3	Dihydro-46-dimethyl-2-(2-methylpropyl)-4H-135-dithiazine	C9H19NS2	M+H
						HMDB40336	3	Dihydro-24-dimethyl-6-(1-methylpropyl)-4H-135-dithiazine	C9H19NS2	M+H
212.982	502.5	3	0	C10:3	-0.364697	No annotations available.
				C10:2	-0.357569
				C18OH	-0.300177
				C20:1	-0.310436
224.127	212.1	3	0.08	C20:1	0.311908	Expand group to view annotations.
				C10:3	0.436631
				C10:2	0.414982
						HMDB15168	3	Cerulenin	C12H17NO3	M+H
						LMFA08010013	3	cis-2-epoxy-4-oxo-7E10E-dodecadienamide	C12H17NO3	M+H
237.031	488.9	3	0	C10:2	-0.301774	No annotations available.
243.133	54.6	3	0.081	C10:2	0.38607	No annotations available.
				C10:3	0.406625
				C20:1	0.344319
245.059	97.3	3	0	C10:2	-0.314279	Expand group to view annotations.
						HMDB02015	3	Cystathionine ketimine	C7H9NO4S	M+ACN+H
257.149	74.9	3	0.083	C10:3	0.377694	No annotations available.
				C10:2	0.318624
				C20:1	0.39666
257.16	45.5	3	0.029	C10:2	0.314213	No annotations available.
				C10:3	0.301687
262.012	54	3	0	C10:2	-0.331325	No annotations available.
264.087	328.4	3	0	C10:3	-0.343363	No annotations available.
268.97	39.7	3	0	C10:2	-0.31555	No annotations available.
272.166	82.1	3	0.076	C20:1	0.325556	Expand group to view annotations.
				C10:3	0.37961
				C10:2	0.350612
						HMDB60766	3	4-Hydroxyatomoxetine	C17H21NO2	M+H
287.146	334.1	3	0.016	C10:3	0.304452	No annotations available.
293.146	70.1	3	0.031	C10:2	0.33581	No annotations available.
				C10:3	0.324729
294.314	512.7	3	0	C10:3	-0.306546	No annotations available.
305.267	433.9	3	0.089	C18OH	0.311458	No annotations available.
				C10:3	0.374088
				C20:1	0.35973
				C10:2	0.377428
307.262	295.3	3	0.038	C10:2	0.369724	Expand group to view annotations.
				C10:3	0.429447
						LMFA07010542	3	(EE)-3711-Trimethyl-2610-dodecatrienyl 3-methylbutanoate	C20H34O2	M+H
						HMDB10378	3	5811-Eicosatrienoic acid	C20H34O2	M+H
						LMFA01030379	3	2E4E8Z-eicosatrienoic acid	C20H34O2	M+H
						LMFA01030386	3	7Z11Z14Z-eicosatrienoic acid	C20H34O2	M+H
						LMFA01140021	3	15-(2-cyclopenten-1-yl)-8-pentadecenoic acid	C20H34O2	M+H
						LMFA01030158	3	8Z11Z14Z-eicosatrienoic acid	C20H34O2	M+H
						LMFA01030767	3	5Z8Z14Z-eicosatrienoic acid	C20H34O2	M+H
						LMFA01020221	3	18-methyl-8Z11Z14Z-nonadecatrienoic acid	C20H34O2	M+H
						LMFA01030381	3	5Z8Z11Z-eicosatrienoic acid	C20H34O2	M+H
						LMFA07010544	3	(EE)-3711-Trimethyl-2610-dodecatrienyl pentanoate	C20H34O2	M+H
						LMFA01030863	3	5Z13Z16Z-eicosatrienoic acid	C20H34O2	M+H
						LMFA07010395	3	3Z6Z9Z-Octadecatrienyl acetate	C20H34O2	M+H
						HMDB02925	3	81114-Eicosatrienoic acid	C20H34O2	M+H
						HMDB60039	3	111417-Eicosatrienoic acid	C20H34O2	M+H
						LMFA01030157	3	5811-eicosatrienoic acid	C20H34O2	M+H
						LMFA01030383	3	71114-Eicosatrienoic acid	C20H34O2	M+H
						LMFA01030384	3	7Z10Z13Z-eicosatrienoic acid	C20H34O2	M+H
						HMDB31058	3	Sciadonic acid	C20H34O2	M+H
						LMFA07010396	3	9Z12Z15Z-Octadecatrienyl acetate	C20H34O2	M+H
						LMFA01030765	3	5Z9E14Z-eicosatrienoic acid	C20H34O2	M+H
						LMFA01030382	3	71013-Eicosatrienoic acid	C20H34O2	M+H
						LMFA01030388	3	8Z12E14Z-eicosatrienoic acid	C20H34O2	M+H
						LMFA01030159	3	111417-eicosatrienoic acid	C20H34O2	M+H
						LMPR0104010010	3	(2Z6E)-2-(3E)-48-dimethylnona-37-dien-1-yl-6-methylocta-26-diene-18-diol	C20H34O2	M+H
						LMFA01030380	3	5Z11Z14Z-eicosatrienoic acid	C20H34O2	M+H
						LMFA01030378	3	11Z14Z17Z-eicosatrienoic acid	C20H34O2	M+H
						LMFA01030385	3	7Z11Z14E-eicosatrienoic acid	C20H34O2	M+H
						HMDB36835	3	Sagittariol	C20H34O2	M+H
326.213	266.8	3	0.047	C10:3	0.463679	Expand group to view annotations.
				C10:2	0.560671
						HMDB61138	3	dinor-Levomethadyl acetate	C21H27NO2	M+H
						HMDB41962	3	Norpropoxyphene	C21H27NO2	M+H
						HMDB11627	3	Farnesylcysteine	C18H31NO2S	M+H
334.248	77.2	3	0.043	C10:2	0.406397	Expand group to view annotations.
				C20:2	0.367014
				C10:3	0.350175
						LMPR0104270001	3	-	C21H32O3	M+H_[+1]
						LMST02030172	3	3beta16alpha-dihydroxypregn-5-en-20-one	C21H32O3	M+H_[+1]
						LMST02030208	3	3beta6alpha-dihydroxy-5alpha-pregn-9(11)-en-20-one	C21H32O3	M+H_[+1]
						LMST02030151	3	1720-dihydroxypregn-4-en-3-one	C21H32O3	M+H_[+1]
						LMST03020006	3	(5Z7E)-(1S3R20S)-910-seco-5710(19)-pregnatriene-1320-triol	C21H32O3	M+H_[+1]
						LMST02030134	3	21-hydroxy-5alpha-pregnane-320-dione	C21H32O3	M+H_[+1]
						LMST02030149	3	1720R-dihydroxypregn-4-en-3-one	C21H32O3	M+H_[+1]
						LMST02030089	3	3beta17alpha-dihydroxypregn-5-en-20-one	C21H32O3	M+H_[+1]
						LMST02030183	3	(20S)-1720-dihydroxypregn-4-en-3-one	C21H32O3	M+H_[+1]
						LMST02030167	3	3beta21-dihydroxypregn-5-en-20-one	C21H32O3	M+H_[+1]
336.154	473.4	3	0.041	C10:3	0.436824	No annotations available.
				C10:2	0.457512
336.215	87.9	3	0.033	C10:3	0.360048	No annotations available.
				C10:2	0.350627
343.261	505.1	3	0.012	C10:2	0.305226	Expand group to view annotations.
						LMFA01030853	3	5Z8Z11Z14Z17Z20Z-tricosahexaenoic acid	C23H34O2	M+H
359.26	131.9	3	0.035	C10:2	0.389036	Expand group to view annotations.
				C10:3	0.373037
						HMDB60114	3	24252627-Tetranor-23-oxo-hydroxyvitamin D3	C23H34O3	M+H
						LMST03020687	3	(1S3R5Z7E)-13-dihydroxy-24-nor-910-secochola-5710(19)-trien-23-al	C23H34O3	M+H
364.247	264.5	3	0.101	C10:3	0.627791	No annotations available.
				C20:1	0.323116
				C10:2	0.667623
381.313	252.4	3	0.03	C10:3	0.326776	No annotations available.
				C10:2	0.322551
382.257	143.2	3	0.046	C10:3	0.430544	No annotations available.
				C10:2	0.579035
396.365	416.1	3	0.019	C10:3	0.361938	No annotations available.
431.113	100.6	3	0.03	C10:3	0.302817	No annotations available.
				C10:2	0.347742
431.241	242.5	3	0	C20:0	-0.33557	Expand group to view annotations.
				C10:3	-0.34989
				C20:1	-0.417284
						HMDB40990	3	3b6b-Diangeloyloxy-7(11)-eremophilen-128b-olide	C25H34O6	M+H
						LMFA07010911	3	(1aR2S5R5aS6S8aS9R10aR)-55a-dihydroxy-4-(hydroxymethyl)-1179-tetramethyl-11-oxo-1a255a691010a-octahydro-1H-28a-methanocyclopentaacyclopropaE10annulen-6-yl (2Z)-2-methylbut-2-enoate	C25H34O6	M+H
						HMDB34659	3	Homofukinolide	C25H34O6	M+H
						HMDB15353	3	Budesonide	C25H34O6	M+H
						HMDB33081	3	Antibiotic CP 412065	C25H34O6	M+H
						HMDB33080	3	Antibiotic CJ 15544	C25H34O6	M+H
442.159	151.1	3	0.078	C10:2	0.357004	No annotations available.
				C10:3	0.369442
				C20:1	0.346256
449.195	383.6	3	0	C10:3	-0.30463	Expand group to view annotations.
				C20:1	-0.323233
						LMPK12160024	3	-	C27H28O6	M+H
455.202	580.2	3	0	C10:2	-0.371274	No annotations available.
				C10:3	-0.317842
466.397	541.5	3	0.016	C10:3	0.304377	No annotations available.
491.296	61.8	3	0.075	C20:1	0.316303	Expand group to view annotations.
				C10:3	0.38856
				C10:2	0.339931
						HMDB41587	3	Macrocarpal I	C28H42O7	M+H
						LMST05050007	3	3beta-(2-O-acetyl-alpha-fucopyranosyloxy)-pregna-520-diene	C28H42O7	M+H
501.264	526	3	0.016	C10:3	0.304102	No annotations available.
503.105	108.7	3	0.041	C18OH	0.323537	No annotations available.
				C10:2	0.390174
				C10:3	0.320785
508.434	559.3	3	0.133	C20:0	0.320682	No annotations available.
				C10:3	0.352956
				C20:1	0.411131
529.295	557.9	3	0.072	C10:3	0.398352	Expand group to view annotations.
				C20:1	0.394065
						LMST01010183	3	(22R)-3beta1425-trihydroxy-6-oxo-5beta-cholest-7-en-22-yl dihydrogen phosphate	C27H45O8P	M+H
541.384	532.5	3	0.132	C20:0	0.332706	No annotations available.
				C10:3	0.364494
				C20:1	0.38054
548.273	533.3	3	0.016	C10:3	0.30136	No annotations available.
558.264	319.3	3	0.012	C10:2	0.303051	No annotations available.
559.47	569.3	3	0.144	C10:3	0.315592	Expand group to view annotations.
				C20:1	0.340902
				C20:0	0.435979
						HMDB56144	3	DG(14:1n50:020:2n6)	C36H64O5	M+H-H2O
						HMDB56003	3	DG(15:00:018:3n3)	C36H64O5	M+H-H2O
						LMGL02010457	3	1-(9Z-pentadecenoyl)-2-(9Z12Z-octadecadienoyl)-sn-glycerol	C36H64O5	M+H-H2O
						HMDB07300	3	DG(18:3(9Z12Z15Z)15:00:0)	C36H64O5	M+H-H2O
						LMGL02010019	3	1-(9Z-hexadecenoyl)-2-(9Z12Z-heptadecadienoyl)-sn-glycerol	C36H64O5	M+H-H2O
						HMDB07271	3	DG(18:3(6Z9Z12Z)15:00:0)	C36H64O5	M+H-H2O
						LMGL02010367	3	1-tridecanoyl-2-(8Z11Z14Z-eicosatrienoyl)-sn-glycerol	C36H64O5	M+H-H2O
						HMDB07076	3	DG(15:018:3(9Z12Z15Z)0:0)	C36H64O5	M+H-H2O
						LMGL02010434	3	1-pentadecanoyl-2-(9Z12Z15Z-octadecatrienoyl)-sn-glycerol	C36H64O5	M+H-H2O
						HMDB07075	3	DG(15:018:3(6Z9Z12Z)0:0)	C36H64O5	M+H-H2O
						HMDB56142	3	DG(14:1n50:018:2n6)	C36H64O5	M+H-H2O
						HMDB55996	3	DG(15:00:018:3n6)	C36H64O5	M+H-H2O
571.448	506.1	3	0.012	C10:2	0.305171	Expand group to view annotations.
						HMDB34902	3	26-Cyclolycopene-15-diol	C40H58O2	M+H
						LMPR01070180	3	-	C40H58O2	M+H
						HMDB60340	3	1515-Dihydroxy-beta-carotene	C40H58O2	M+H
						LMPR01070178	3	-	C40H58O2	M+H
						LMPR01070092	3	-	C40H58O2	M+H
						HMDB02746	3	cis-56-Dihydro-56-dihydroxy-carotene	C40H58O2	M+H
						HMDB36915	3	Parasiloxanthin	C40H58O2	M+H
594.478	579.8	3	0.14	C20:1	0.323709	No annotations available.
				C20:0	0.419043
				C10:3	0.337303
597.446	589.6	3	0.017	C10:3	0.312906	No annotations available.
632.398	141.2	3	0.03	C10:3	0.312433	No annotations available.
				C10:2	0.346421
635.483	550.9	3	0.04	C10:3	0.443169	No annotations available.
				C10:2	0.415378
673.703	333.1	3	0.034	C10:3	0.340933	No annotations available.
				C10:2	0.395291
674.039	334.7	3	0.014	C10:2	0.361788	No annotations available.
678.598	563.2	3	0.072	C10:2	0.304654	No annotations available.
				C20:1	0.324657
				C10:3	0.346052
683.489	530.6	3	0.088	C20:0	0.308716	No annotations available.
				C10:3	0.311913
				C10:2	0.305339
703.471	546.1	3	0.028	C10:2	0.301421	No annotations available.
				C10:3	0.302048
				C10:2	0.304389
730.591	554.8	3	0	C10:2	-0.322967	No annotations available.
				C10:3	-0.306414
744.397	54.4	3	0.031	C10:3	0.338171	No annotations available.
				C10:2	0.328671
748.083	498.4	3	0.012	C10:2	0.305386	No annotations available.
750.621	555.6	3	0.029	C10:3	0.310793	No annotations available.
				C10:2	0.32179
780.508	528.4	3	0	C10:2	-0.321558	No annotations available.
				C10:3	-0.309307
798.03	445.3	3	0.013	C10:2	0.333441	No annotations available.
890.537	583.4	3	0	C10:3	-0.336163	No annotations available.
950.307	38.1	3	0.029	C10:2	0.317149	No annotations available.
				C10:3	0.310464
993.217	521.5	3	0.058	C20:1	0.319322	No annotations available.
				C10:3	0.323648
1038.4	41.2	3	0.014	C10:2	0.353555	No annotations available.
1073.57	34.6	3	0.013	C10:2	0.329989	No annotations available.
1100.75	483.2	3	0.012	C10:2	0.301143	Expand group to view annotations.
						LMSP03030071	3	N-(hexacosanoyl)-4R-hydroxysphinganine-1-O-D-mannopyranosyl-alpha1-2-myo-inositol-1-phosphate	C56H110NO17P	M+H
						LMSP03030100	3	N-(tetracosanoyl)-4R-hydroxyeicosasphinganine-1-O-D-mannopyranosyl-alpha1-2-myo-inositol-1-phosphate	C56H110NO17P	M+H
						LMSP03030088	3	N-(2-hydroxytetracosanoyl)-eicosasphinganine-1-O-D-mannopyranosyl-alpha1-2-myo-inositol-1-phosphate	C56H110NO17P	M+H
						LMSP03030059	3	N-(2-hydroxyhexacosanoyl)-sphinganine-1-O-D-mannopyranosyl-alpha1-2-myo-inositol-1-phosphate	C56H110NO17P	M+H
1102.24	517.9	3	0.016	C10:3	0.304806	No annotations available.
1109.06	521	3	0.031	C10:2	0.301569	No annotations available.
				C10:3	0.355774
1113.76	480.2	3	0.017	C10:3	0.321967	No annotations available.
1114.93	270.3	3	0.031	C10:3	0.334083	No annotations available.
				C10:2	0.336758
1169.43	277.4	3	0	C10:2	-0.311256	No annotations available.
				C20:2	-0.30772
1193.11	486.8	3	0.035	C10:3	0.353819	No annotations available.
				C10:2	0.410225
1203.53	502.7	3	0.031	C10:3	0.31865	No annotations available.
				C10:2	0.344529
1215.2	273.7	3	0	C10:3	-0.324498	No annotations available.
1225.74	285.2	3	0.012	C10:2	0.316794	No annotations available.
1232.44	275.4	3	0.012	C10:2	0.305076	No annotations available.
1265.21	271.8	3	0.016	C10:3	0.304427	No annotations available.
1287.44	29.4	3	0.153	C10:2	0.335641	No annotations available.
				C10:3	0.392964
				C20:1	0.379285
				C20:0	0.364117
1290.34	485.1	3	0.078	C10:3	0.351731	No annotations available.
				C10:2	0.335859
				C20:1	0.359914
1300.19	27.8	3	0	C10:3	-0.303472	No annotations available.
1307.71	27.6	3	0	C10:3	-0.300059	No annotations available.
1316.81	397.5	3	0	C10:3	-0.307425	No annotations available.
1323.23	35.7	3	0	C10:3	-0.344091	No annotations available.
				C10:2	-0.336196
1351.17	275.6	3	0.012	C10:2	0.300111	No annotations available.
1358.96	31.3	3	0	C10:2	-0.300555	No annotations available.
1397.67	35	3	0.012	C10:2	0.313638	No annotations available.
1439.33	273.6	3	0.029	C10:2	0.311244	No annotations available.
				C10:3	0.309217
1444.77	557.2	3	0.031	C10:2	0.324185	No annotations available.
				C10:3	0.336559
1475.69	34.6	3	0.03	C10:2	0.319244	No annotations available.
				C10:3	0.321392
1524.67	271.1	3	0.012	C10:2	0.310856	No annotations available.
1541.16	35	3	0	C10:3	-0.303972	No annotations available.
				C10:2	-0.327281
164.993	72	3	0.062	C10:3	0.336167	No annotations available.
				C20:1	0.344268
426.268	324	3	0	C10:3	-0.375272	No annotations available.
				C20:1	-0.458953
				C10:2	-0.367997
				C20:2	-0.315469
				C18OH	-0.354764
1442.62	43	3	0.029	C10:2	0.316093	No annotations available.
				C10:3	0.313037
1616.57	47.5	3	0.035	C10:2	0.383029	No annotations available.
				C10:3	0.374754
104.297	479.4	4	0.045	C20:1	0.349913	No annotations available.
151.074	501.7	4	0.043	C20:1	0.336497	Expand group to view annotations.
						HMDB40428	3	2-Phenylethyl formate	C9H10O2	M+H
						HMDB33970	3	4-Ethoxybenzaldehyde	C9H10O2	M+H
						HMDB33967	3	Ethyl benzoate	C9H10O2	M+H
						HMDB02097	3	4-Ethylbenzoic acid	C9H10O2	M+H
						HMDB32570	3	4-Methoxyacetophenone	C9H10O2	M+H
						HMDB32075	3	p-Tolyl acetate	C9H10O2	M+H
						HMDB32592	3	2-Hydroxy-5-methylacetophenone	C9H10O2	M+H
						HMDB32073	3	o-Tolyl acetate	C9H10O2	M+H
						HMDB13744	3	2-Methoxy-4-vinylphenol	C9H10O2	M+H
						HMDB32617	3	Methyl phenylacetate	C9H10O2	M+H
						HMDB31310	3	Benzyl acetate	C9H10O2	M+H
						HMDB11743	3	2-Phenylpropionate	C9H10O2	M+H
						HMDB37715	3	1-Phenylethyl formate	C9H10O2	M+H
						HMDB02237	3	34-Dimethylbenzoic acid	C9H10O2	M+H
						HMDB32569	3	2-Methoxyacetophenone	C9H10O2	M+H
						HMDB02222	3	3-Methylphenylacetic acid	C9H10O2	M+H
						HMDB59824	3	4-Hydroxy-3-methylacetophenone	C9H10O2	M+H
						HMDB40925	3	2-(2-Furanyl)-3-methyl-2-butenal	C9H10O2	M+H
						HMDB38355	3	2-Ethyl-4-(2-furanyl)-2-propenal	C9H10O2	M+H
						HMDB03654	3	4-Coumaryl alcohol	C9H10O2	M+H
						HMDB00764	3	Hydrocinnamic acid	C9H10O2	M+H
189.617	533.7	4	0.102	C20:1	0.310735	No annotations available.
				C20:0	0.327606
196.099	552.9	4	0.046	C20:1	0.35981	No annotations available.
200.032	180.7	4	0.1	C20:1	0.318499	Expand group to view annotations.
				C20:0	0.307582
						HMDB11185	3	O-Phosphothreonine	C4H10NO6P	M+H
						HMDB60483	3	Iminoerythrose 4-phosphate	C4H10NO6P	M+H
						HMDB03484	3	O-Phosphohomoserine	C4H10NO6P	M+H
204.121	511.8	4	0.049	C20:1	0.384728	Expand group to view annotations.
						LMFA07070060	3	3-(acetyloxy)-4-(trimethylazaniumyl)butanoate	C9H17NO4	M+H
						LMFA07070050	3	(3R)-3-acetyloxy-4-(trimethylazaniumyl)butanoate	C9H17NO4	M+H
						LMFA07070049	3	(3S)-3-acetoxy-4-(trimethylammonio)butyrate	C9H17NO4	M+H
						HMDB00201	3	L-Acetylcarnitine	C9H17NO4	M+H
214.167	506	4	0.101	C20:0	0.303574	No annotations available.
				C20:1	0.338234
219.21	466.5	4	0.038	C20:1	0.301006	Expand group to view annotations.
						HMDB34498	3	(3E7E)-4812-Trimethyl-13711-tridecatetraene	C16H26	M+H
						LMFA11000335	3	2610-Trimethyl-(EE)-261012-tridecatetraene	C16H26	M+H
						HMDB37740	3	12-Dimethyl-4-(6-methyl-4-heptenyl)-13-cyclohexadiene	C16H26	M+H
						LMFA11000501	3	7-Ethyl-311-dimethyldodeca-13610-tetraene	C16H26	M+H
249.009	97.4	4	0.04	C20:1	0.310333	Expand group to view annotations.
						HMDB41788	3	Vanillic acid 4-sulfate	C8H8O7S	M+H
266.946	49.8	4	0.044	C20:1	0.34901	No annotations available.
293.21	514.9	4	0.04	C20:1	0.311689	Expand group to view annotations.
						LMFA02000028	3	13-keto-9Z11E15Z-octadecatrienoic acid	C18H28O3	M+H
						HMDB30996	3	(2E4Z7Z8E)-Colnelenic acid	C18H28O3	M+H
						LMFA02000053	3	1213S-epoxy-9Z1115Z-octadecatrienoic acid	C18H28O3	M+H
						LMFA02010001	3	(1S2S)-3-oxo-2-(2Z-pentenyl)cyclopent-4-eneoctanoic acid	C18H28O3	M+H
						LMFA02000273	3	4-oxo-9Z11E13E-octadecatrienoic acid	C18H28O3	M+H
						LMFA02000193	3	8-hydroxy-911-octadecadiynoic acid	C18H28O3	M+H
						LMFA02000194	3	8-hydroxy-1012-octadecadiynoic acid	C18H28O3	M+H
						HMDB40806	3	7-Paradol	C18H28O3	M+H
						LMFA05000686	3	10-methoxyheptadec-1-en-46-diyne-39-diol	C18H28O3	M+H
						LMFA02000191	3	(-)-8-hydroxy-11E17-octadecadien-9-ynoic acid	C18H28O3	M+H
						LMFA10000002	3	9-1E3Z6Z-trien-1-yloxy-non-8E-enoic acid	C18H28O3	M+H
						LMFA10000003	3	12-(1E3Z-Hexadienyloxy)-9Z11E-dodecadienoic acid	C18H28O3	M+H
						HMDB38035	3	Panaquinquecol 1	C18H28O3	M+H
						LMFA02000192	3	9-hydroxy-10E14Z-octadecadien-12-ynoic acid	C18H28O3	M+H
302.12	64.9	4	0.04	C20:1	0.310905	No annotations available.
305.232	290.6	4	0.069	C10:3	0.328929	Expand group to view annotations.
				C20:1	0.402821
						LMFA01050100	3	8916-trihydroxy-hexadecanoic acid	C16H32O5	M+H
						LMFA01050099	3	21516-trihydroxy-hexadecanoic acid	C16H32O5	M+H
						LMFA01050101	3	91016-trihydroxy-hexadecanoic acid	C16H32O5	M+H
						LMFA01050102	3	111215-trihydroxy-hexadecanoic acid	C16H32O5	M+H
354.132	371.4	4	0.103	C20:1	0.339043	Expand group to view annotations.
				C20:0	0.309266
						HMDB03920	3	Protopine	C20H19NO5	M+H
						HMDB30375	3	Citracridone I	C20H19NO5	M+H
						HMDB30265	3	22-Dimethyl(pyrano-56:3:4)-15-dihydroxy-6-methoxy-10-methylacridone	C20H19NO5	M+H
						HMDB33445	3	Honyumine	C20H19NO5	M+H
						HMDB30322	3	Papaveraldine	C20H19NO5	M+H
354.172	487.2	4	0.051	C20:1	0.400035	Expand group to view annotations.
						HMDB60595	3	Olopatadine n-oxide	C21H23NO4	M+H
362.169	494.2	4	0.053	C20:1	0.412254	Expand group to view annotations.
						HMDB39034	3	Casegravol isovalerate	C20H24O6	M+H_[+1]
						HMDB40311	3	34578-Pentamethoxyflavan	C20H24O6	M+H_[+1]
						HMDB32717	3	Lepidine C	C21H20N4O2	M+H_[+1]
						HMDB39100	3	4-Acetylzearalenone	C20H24O6	M+H_[+1]
						HMDB37235	3	Quassinol	C20H24O6	M+H_[+1]
						HMDB40796	3	6-O-Formylmarmin	C20H24O6	M+H_[+1]
						HMDB33437	3	Lepidine	C21H20N4O2	M+H_[+1]
						HMDB14658	3	Anisotropine Methylbromide	C17H32BrNO2	M+H
364.887	500.2	4	0.039	C20:1	0.309123	No annotations available.
374.316	322	4	0.039	C20:1	0.305385	No annotations available.
375.076	525.6	4	0.041	C20:1	0.323365	No annotations available.
377.93	48.7	4	0.102	C20:0	0.326696	No annotations available.
				C20:1	0.312387
383.042	564.5	4	0.101	C20:1	0.305794	Expand group to view annotations.
				C20:0	0.325765
						HMDB29202	3	hesperetin 3-O-sulfate	C16H14O9S	M+H
384.039	567.6	4	0.106	C20:1	0.341599	Expand group to view annotations.
				C20:0	0.324205
						HMDB15427	3	Ceftizoxime	C13H13N5O5S2	M+H
403.224	259	4	0.073	C20:1	0.439991	Expand group to view annotations.
				C10:3	0.316278
						HMDB60583	3	Trandolaprilat	C22H30N2O5	M+H
412.376	459.2	4	0.107	C20:0	0.32483	Expand group to view annotations.
				C20:1	0.348156
						HMDB13314	3	Tricosanoylglycine	C25H49NO3	M+H
418.141	69.1	4	0.101	C20:1	0.329378	No annotations available.
				C20:0	0.307926
419.145	73.6	4	0.101	C20:0	0.30823	Expand group to view annotations.
				C20:1	0.325546
						LMPK12050179	3	-	C25H22O6	M+H
						LMPK12110913	3	-	C25H22O6	M+H
						LMPK12120527	3	-	C25H22O6	M+H
						HMDB30687	3	Cyclomorusin	C25H22O6	M+H
						LMPK12110923	3	-	C25H22O6	M+H
						LMPK12050213	3	-	C25H22O6	M+H
						LMPK12160010	3	-	C25H22O6	M+H
						HMDB30108	3	Cudraflavone A	C25H22O6	M+H
423.275	575.6	4	0	C20:1	-0.301943	Expand group to view annotations.
						LMST04010383	3	3alpha7alpha12beta-Trihydroxy-11-oxo-5beta-cholan-24-oic Acid	C24H38O6	M+H
						LMST04010274	3	3alpha6alpha12alpha-Trihydroxy-7-oxo-5beta-cholan-24-oic Acid	C24H38O6	M+H
						LMST04010262	3	3alpha7beta12alpha-Trihydroxy-6-oxo-5alpha-cholan-24-oic Acid	C24H38O6	M+H
						LMST04010409	3	2beta7alpha12alpha-Trihydroxy-3-oxo-5beta-cholan-24-oic Acid	C24H38O6	M+H
						LMST04010415	3	3alpha7alpha11alpha-Trihydroxy-12-oxo-5beta-cholan-24-oic Acid	C24H38O6	M+H
430.21	581.9	4	0.046	C20:1	0.359313	No annotations available.
433.181	547.6	4	0.039	C20:1	0.30737	Expand group to view annotations.
						HMDB60708	3	15beta-hydroxycyproterone acetate	C24H29ClO5	M+H
						HMDB38686	3	Armillaricin	C24H29ClO5	M+H
441.375	397.2	4	0.041	C20:1	0.325635	Expand group to view annotations.
						LMST03010065	3	(5Z7E22E)-(1S3R)-2627-dihomo-910-seco-5710(19)22-ergostatetraen-13-diol	C30H48O2	M+H
						LMST01040183	3	4-methylene-15-oxo-5alpha-poriferast-8(9)-en-3beta-ol	C30H48O2	M+H
						HMDB01421	3	44-Dimethyl-14a-formyl-5a-cholesta-824-dien-3b-ol	C30H48O2	M+H
						HMDB39642	3	Rofficerone	C30H48O2	M+H
						HMDB34506	3	Soyasapogenol C	C30H48O2	M+H
						HMDB36774	3	Sebiferic acid	C30H48O2	M+H
						HMDB36800	3	3beta-Hydroxy-22(30)-hopen-29-al	C30H48O2	M+H
						HMDB34511	3	Oleanolic aldehyde	C30H48O2	M+H
						HMDB35355	3	3beta-3-Hydroxy-18-lupen-21-one	C30H48O2	M+H
						HMDB37033	3	28-Hydroxy-14-taraxeren-3-one	C30H48O2	M+H
						HMDB33257	3	Myricolal	C30H48O2	M+H
						LMFA01030840	3	12Z15Z18Z21Z24Z27Z-triacontahexaenoic acid	C30H48O2	M+H
						LMST03010066	3	(5Z7E22E)-(1S3R24S)-24-methyl-2627-dihomo-910-seco-5710(19)22-ergostatetraen-13-diol	C30H48O2	M+H
						HMDB35314	3	Ganoderol B	C30H48O2	M+H
						LMST01010222	3	44-dimethyl-14alpha-formyl-5alpha-cholesta-824-dien-3beta-ol	C30H48O2	M+H
453.33	314.4	4	0.039	C20:1	0.309518	Expand group to view annotations.
						LMGP10060003	3	1-eicosyl-glycero-3-phosphate	C23H49O6P	M+H
458.265	337.6	4	0	C20:1	-0.313869	Expand group to view annotations.
						HMDB11479	3	LysoPE(0:018:3(9Z12Z15Z))	C23H42NO7P	M+H-H2O
						LMGP02050017	3	1-(6Z9Z12Z-octadecatrienoyl)-glycero-3-phosphoethanolamine	C23H42NO7P	M+H-H2O
						HMDB11508	3	LysoPE(18:3(6Z9Z12Z)0:0)	C23H42NO7P	M+H-H2O
						LMGP02050029	3	1-(9Z12Z15Z-octadecatrienoyl)-glycero-3-phosphoethanolamine	C23H42NO7P	M+H-H2O
						HMDB11478	3	LysoPE(0:018:3(6Z9Z12Z))	C23H42NO7P	M+H-H2O
						HMDB11509	3	LysoPE(18:3(9Z12Z15Z)0:0)	C23H42NO7P	M+H-H2O
						LMGP02050042	3	(2-aminoethoxy)(2R)-3-hydroxy-2-(6Z9Z12Z)-octadeca-6912-trienoyloxypropoxyphosphinic acid	C23H42NO7P	M+H-H2O
						LMGP02050043	3	(2-aminoethoxy)(2R)-3-hydroxy-2-(9Z12Z15Z)-octadeca-91215-trienoyloxypropoxyphosphinic acid	C23H42NO7P	M+H-H2O
460.31	49.1	4	0	C20:1	-0.317192	No annotations available.
480.211	347.3	4	0.039	C20:1	0.30577	Expand group to view annotations.
						HMDB14760	3	Nicardipine	C26H29N3O6	M+H
486.327	535.1	4	0.038	C20:1	0.300521	No annotations available.
487.783	337.6	4	0	C20:1	-0.382922	No annotations available.
				C20:0	-0.331616
508.469	533.4	4	0.04	C20:1	0.310935	Expand group to view annotations.
						LMSP02010022	3	N-(tetradecanoyl)-4E14Z-sphingadienine	C32H61NO3	M+H
						LMSP02010052	3	N-(octadecanoyl)-4E6E-tetradecasphingadienine	C32H61NO3	M+H
						LMSP02010035	3	N-(9Z-octadecenoyl)-tetradecasphing-4-enine	C32H61NO3	M+H
514.107	564	4	0.11	C20:0	0.322136	No annotations available.
				C20:1	0.37821
518.816	274.5	4	0	C20:1	-0.343751	No annotations available.
563.229	337.9	4	0	C20:0	-0.356183	No annotations available.
				C20:1	-0.362008
580.78	507.3	4	0	C20:1	-0.315331	No annotations available.
581.212	359.5	4	0.04	C20:1	0.316085	No annotations available.
584.279	342.7	4	0.048	C20:1	0.378147	No annotations available.
602.793	499.3	4	0	C20:0	-0.343303	No annotations available.
				C20:1	-0.307998
607.451	517.6	4	0.041	C20:1	0.319562	No annotations available.
608.331	345.2	4	0	C20:1	-0.306726	No annotations available.
615.16	572.6	4	0.042	C20:1	0.329606	Expand group to view annotations.
						HMDB37431	3	Allivicin	C27H30O16	M+H_[+4]
						HMDB29812	3	Quercetin 8-C-(2-rhamnosylglucoside)	C27H30O16	M+H_[+4]
						HMDB33824	3	Isoorientin 7-glucoside	C27H30O16	M+H_[+4]
						HMDB03249	3	Rutin	C27H30O16	M+H_[+4]
						HMDB37538	3	Quercetin 3-galactoside 7-rhamnoside	C27H30O16	M+H_[+4]
						HMDB39383	3	Quercetin 7-(rhamnosylglucoside)	C27H30O16	M+H_[+4]
						HMDB37433	3	Paeonoside	C27H30O16	M+H_[+4]
						HMDB37935	3	Multinoside A	C27H30O16	M+H_[+4]
						HMDB29478	3	Meloside L	C27H30O16	M+H_[+4]
						HMDB37933	3	Calendoflavobioside	C27H30O16	M+H_[+4]
						HMDB01176	3	Cytidine monophosphate N-acetylneuraminic acid	C20H31N4O16P	M+H
						HMDB29258	3	Luteolin 6-C-glucoside 8-C-arabinoside	C27H30O16	M+H_[+4]
						HMDB40490	3	Isorhamnetin 3-O-b-D-xylopyranosyl-(1-6)-b-D-glucopyranoside	C27H30O16	M+H_[+4]
						HMDB40489	3	Isoquercitrin 4-rhamnoside	C27H30O16	M+H_[+4]
						HMDB37534	3	Panasenoside	C27H30O16	M+H_[+4]
						HMDB37934	3	Quercetin 7-rutinoside	C27H30O16	M+H_[+4]
						HMDB32908	3	Kaempferol 7-sophoroside	C27H30O16	M+H_[+4]
						HMDB40715	3	Rheinoside A	C27H30O16	M+H_[+4]
						HMDB40486	3	Quercetin 3-(2-glucosylrhamnoside)	C27H30O16	M+H_[+4]
619.436	555.2	4	0.046	C20:1	0.360629	Expand group to view annotations.
						LMGP10010320	3	1-(9Z-octadecenoyl)-2-dodecanoyl-glycero-3-phosphate	C33H63O8P	M+H
						LMGP10010072	3	1-tridecanoyl-2-(9Z-heptadecenoyl)-glycero-3-phosphate	C33H63O8P	M+H
						LMGP10010942	3	1-dodecanoyl-2-(9Z-octadecenoyl)-glycero-3-phosphate	C33H63O8P	M+H
						LMGP10010140	3	1-pentadecanoyl-2-(9Z-pentadecenoyl)-glycero-3-phosphate	C33H63O8P	M+H
						HMDB29654	3	36-Epoxy-5566-tetrahydro-bb-carotene-3556-tetrol	C40H58O5	M+H
						LMGP10010163	3	1-(9Z-pentadecenoyl)-2-pentadecanoyl-glycero-3-phosphate	C33H63O8P	M+H
						LMGP10010201	3	1-(9Z-hexadecenoyl)-2-tetradecanoyl-glycero-3-phosphate	C33H63O8P	M+H
						LMGP10010191	3	1-hexadecanoyl-2-(9Z-tetradecenoyl)-glycero-3-phosphate	C33H63O8P	M+H
						LMGP10010247	3	1-(9Z-heptadecenoyl)-2-tridecanoyl-glycero-3-phosphate	C33H63O8P	M+H
						LMGP10010112	3	1-(9Z-tetradecenoyl)-2-hexadecanoyl-glycero-3-phosphate	C33H63O8P	M+H
						LMGP10010931	3	1-tetradecanoyl-2-(9Z-hexadecenoyl)-glycero-3-phosphate	C33H63O8P	M+H
665.919	59.5	4	0.045	C20:1	0.350653	No annotations available.
667.436	495.3	4	0.041	C20:1	0.319201	Expand group to view annotations.
						LMGP10010129	3	1-(9Z-tetradecenoyl)-2-(5Z8Z11Z14Z-eicosatetraenoyl)-glycero-3-phosphate	C37H63O8P	M+H
						LMGP10010924	3	1-tetradecanoyl-2-(5Z8Z11Z14Z17Z-eicosapentaenoyl)-glycero-3-phosphate	C37H63O8P	M+H
						LMGP10010621	3	1-(5Z8Z11Z14Z-eicosatetraenoyl)-2-(9Z-tetradecenoyl)-glycero-3-phosphate	C37H63O8P	M+H
						LMGP10010430	3	1-(6Z9Z12Z15Z-octadecatetraenoyl)-2-(9Z-hexadecenoyl)-glycero-3-phosphate	C37H63O8P	M+H
						LMGP10010901	3	1-(9Z-hexadecenoyl)-2-(6Z9Z12Z15Z-octadecatetraenoyl)-glycero-3-phosphate	C37H63O8P	M+H
						LMGP10010649	3	1-(5Z8Z11Z14Z17Z-eicosapentaenoyl)-2-tetradecanoyl-glycero-3-phosphate	C37H63O8P	M+H
						HMDB39050	3	Notoginsenoside T2	C37H62O10	M+H
685.727	435.2	4	0	C20:1	-0.319312	No annotations available.
687.43	57.2	4	0	C20:0	-0.343038	Expand group to view annotations.
					-0.319209
						LMGP04010056	3	1-dodecanoyl-2-(6Z9Z12Z15Z-octadecatetraenoyl)-glycero-3-phospho-(1-sn-glycerol)	C36H63O10P	M+H
						LMGP04010425	3	1-(6Z9Z12Z15Z-octadecatetraenoyl)-2-dodecanoyl-glycero-3-phospho-(1-sn-glycerol)	C36H63O10P	M+H
697.044	511.4	4	0	C20:1	-0.304134	No annotations available.
703.721	503.3	4	0	C20:0	-0.30487	No annotations available.
				C20:1	-0.305866
753.681	442.9	4	0.04	C20:1	0.310951	No annotations available.
758.082	580.1	4	0.039	C20:1	0.309932	No annotations available.
771.682	520.4	4	0	C20:1	-0.311386	No annotations available.
778.448	315.4	4	0.04	C20:1	0.314964	No annotations available.
781.383	548.3	4	0	C20:1	-0.303653	No annotations available.
781.733	580.6	4	0	C20:1	-0.3047	No annotations available.
811.417	568.2	4	0	C20:0	-0.354865	Expand group to view annotations.
				C20:1	-0.397146
						HMDB33427	3	Betavulgaroside VII	C41H62O16	M+H
813.307	331	4	0	C20:1	-0.399033	No annotations available.
847.102	511.4	4	0	C20:1	-0.312797	No annotations available.
877.994	535.9	4	0	C20:1	-0.350894	No annotations available.
890.477	99.9	4	0	C20:0	-0.351738	No annotations available.
				C20:1	-0.305164
1023.13	442.8	4	0.041	C20:1	0.319623	No annotations available.
1043.02	527.1	4	0.039	C20:1	0.302595	No annotations available.
1066.49	39.5	4	0.042	C20:1	0.332444	No annotations available.
1073.89	517.2	4	0.046	C20:1	0.364776	No annotations available.
1080.83	481.6	4	0	C20:1	-0.306272	No annotations available.
1089.06	502	4	0.045	C20:1	0.351968	No annotations available.
1097.76	483.1	4	0.039	C20:1	0.306207	No annotations available.
1118.08	583.4	4	0	C20:1	-0.300222	No annotations available.
1132.48	35.3	4	0.044	C20:1	0.348018	No annotations available.
1211.59	581.2	4	0	C20:1	-0.304494	No annotations available.
1222.61	559.5	4	0.039	C20:1	0.309862	No annotations available.
1223.67	569.7	4	0.04	C20:1	0.315494	No annotations available.
1245.68	568.4	4	0.039	C20:1	0.308026	No annotations available.
1275.23	281.1	4	0	C20:1	-0.337524	No annotations available.
1302.79	26.4	4	0.039	C20:1	0.307261	No annotations available.
1304.16	559.9	4	0.054	C20:1	0.421689	No annotations available.
1352.3	374.2	4	0.044	C20:1	0.342558	No annotations available.
1363.2	26.7	4	0.127	C20:1	0.365784	No annotations available.
				C20:0	0.417576
1387.1	278.3	4	0	C20:1	-0.303581	No annotations available.
1397.19	268.7	4	0	C20:1	-0.303831	No annotations available.
1427.36	31.7	4	0	C20:1	-0.368206	No annotations available.
1430.3	35	4	0.039	C20:1	0.305216	No annotations available.
1438.06	275.2	4	0.038	C20:1	0.302177	Expand group to view annotations.
						LMGP12010067	3	1-1-hexadecanoyl-2-octadecanoyl-sn-glycero-3-phospho3-1-eicosanoyl-2-hexadecanoyl-sn-glycero-3-phospho-sn-glycerol	C79H154O17P2	M+H
						HMDB56497	3	CL(16:018:018:018:0)	C79H154O17P2	M+H
						LMGP12010157	3	1-1-hexadecanoyl-2-eicosanoyl-sn-glycero-3-phospho3-1-octadecanoyl-2-hexadecanoyl-sn-glycero-3-phospho-sn-glycerol	C79H154O17P2	M+H
						LMGP12010907	3	1-1-eicosanoyl-2-octadecanoyl-sn-glycero-3-phospho3-12-dihexadecanoyl-sn-glycero-3-phospho-sn-glycerol	C79H154O17P2	M+H
						LMGP12010260	3	1-12-dioctadecanoyl-sn-glycero-3-phospho3-1-hexadecanoyl-2-octadecanoyl-sn-glycero-3-phospho-sn-glycerol	C79H154O17P2	M+H
						LMGP12010872	3	1-1-eicosanoyl-2-hexadecanoyl-sn-glycero-3-phospho3-1-hexadecanoyl-2-octadecanoyl-sn-glycero-3-phospho-sn-glycerol	C79H154O17P2	M+H
						LMGP12010017	3	1-12-dihexadecanoyl-sn-glycero-3-phospho3-1-octadecanoyl-2-eicosanoyl-sn-glycero-3-phospho-sn-glycerol	C79H154O17P2	M+H
						LMGP12010877	3	1-1-eicosanoyl-2-hexadecanoyl-sn-glycero-3-phospho3-1-octadecanoyl-2-hexadecanoyl-sn-glycero-3-phospho-sn-glycerol	C79H154O17P2	M+H
						HMDB56923	3	CL(18:016:018:018:0)	C79H154O17P2	M+H
						LMGP12010227	3	1-1-octadecanoyl-2-hexadecanoyl-sn-glycero-3-phospho3-1-hexadecanoyl-2-eicosanoyl-sn-glycero-3-phospho-sn-glycerol	C79H154O17P2	M+H
						LMGP12010032	3	1-12-dihexadecanoyl-sn-glycero-3-phospho3-1-eicosanoyl-2-octadecanoyl-sn-glycero-3-phospho-sn-glycerol	C79H154O17P2	M+H
						LMGP12010047	3	1-1-hexadecanoyl-2-octadecanoyl-sn-glycero-3-phospho3-1-hexadecanoyl-2-eicosanoyl-sn-glycero-3-phospho-sn-glycerol	C79H154O17P2	M+H
						LMGP12010152	3	1-1-hexadecanoyl-2-eicosanoyl-sn-glycero-3-phospho3-1-hexadecanoyl-2-octadecanoyl-sn-glycero-3-phospho-sn-glycerol	C79H154O17P2	M+H
						LMGP12010050	3	1-1-hexadecanoyl-2-octadecanoyl-sn-glycero-3-phospho3-12-dioctadecanoyl-sn-glycero-3-phospho-sn-glycerol	C79H154O17P2	M+H
						LMGP12010230	3	1-1-octadecanoyl-2-hexadecanoyl-sn-glycero-3-phospho3-12-dioctadecanoyl-sn-glycero-3-phospho-sn-glycerol	C79H154O17P2	M+H
						LMGP12010247	3	1-1-octadecanoyl-2-hexadecanoyl-sn-glycero-3-phospho3-1-eicosanoyl-2-hexadecanoyl-sn-glycero-3-phospho-sn-glycerol	C79H154O17P2	M+H
						LMGP12010265	3	1-12-dioctadecanoyl-sn-glycero-3-phospho3-1-octadecanoyl-2-hexadecanoyl-sn-glycero-3-phospho-sn-glycerol	C79H154O17P2	M+H
						LMGP12010367	3	1-1-octadecanoyl-2-eicosanoyl-sn-glycero-3-phospho3-12-dihexadecanoyl-sn-glycero-3-phospho-sn-glycerol	C79H154O17P2	M+H
1450.18	30.2	4	0.041	C20:1	0.324355	No annotations available.
1502.75	276.2	4	0.04	C20:1	0.316843	No annotations available.
1509.67	35.2	4	0.039	C20:1	0.308809	No annotations available.
1530.58	274.7	4	0	C20:1	-0.322661	No annotations available.
1535.03	271.8	4	0.04	C20:1	0.316685	No annotations available.
1554.2	31	4	0.039	C20:1	0.30769	No annotations available.
1559.34	285.8	4	0	C20:1	-0.303464	No annotations available.
1585.67	270.4	4	0.05	C20:1	0.396119	No annotations available.
1651.68	270	4	0.041	C20:1	0.32302	No annotations available.
1739.09	295.4	4	0	C20:1	-0.336206	No annotations available.
1983.27	394.4	4	0	C20:1	-0.313379	No annotations available.
103.075	573.5	4	0	C20:1	-0.305594	Expand group to view annotations.
						LMFA12000015	3	2-hydroxy-pentan-3-one	C5H10O2	M+H
						HMDB31247	3	2-Methylpropyl formate	C5H10O2	M+H
						LMFA07010411	3	ethyl propionate	C5H10O2	M+H
						LMFA01020072	3	2-methyl-butanoic acid	C5H10O2	M+H
						HMDB31249	3	Methyl isobutyrate	C5H10O2	M+H
						LMFA07010528	3	Methyl butyrate	C5H10O2	M+H
						HMDB40575	3	Butyl formate	C5H10O2	M+H
						HMDB39799	3	Tetrahydro-2-methyl-3-furanol	C5H10O2	M+H
						HMDB00892	3	Valeric acid	C5H10O2	M+H
						HMDB34237	3	Propyl acetate	C5H10O2	M+H
						HMDB59678	3	1-Hydroxy-2-pentanone	C5H10O2	M+H
						HMDB02176	3	Ethylmethylacetic acid	C5H10O2	M+H
						HMDB31516	3	3-Hydroxy-2-pentanone	C5H10O2	M+H
						HMDB32230	3	24-Dimethyl-13-dioxolane	C5H10O2	M+H
						HMDB30058	3	Ethyl propionate	C5H10O2	M+H
						LMFA01020073	3	22-dimethyl-propanoic acid	C5H10O2	M+H
						LMFA01020181	3	3-methyl-butanoic acid	C5H10O2	M+H
						LMFA12000066	3	3-Hydroxy-3-methylbutan-2-one	C5H10O2	M+H
						LMFA01010005	3	pentanoic acid	C5H10O2	M+H
						HMDB32263	3	Ethylene oxidepropylene oxide copolymer	C5H10O2	M+H
						HMDB31175	3	Tetrahydro-2-furanmethanol	C5H10O2	M+H
						HMDB41992	3	Pivalic acid	C5H10O2	M+H
						HMDB31241	3	Isopropyl acetate	C5H10O2	M+H
						HMDB33890	3	Methyl butyrate	C5H10O2	M+H
						HMDB33742	3	(S)-2-Methylbutanoic acid	C5H10O2	M+H
						HMDB00718	3	Isovaleric acid	C5H10O2	M+H
						LMFA12000022	3	3-Hydroxypentan-2-one	C5H10O2	M+H
131.107	570.7	4	0.042	C20:1	0.327264	Expand group to view annotations.
						HMDB32204	3	cis- and trans-2-Isopropyl-4-methyl-13-dioxolane	C7H14O2	M+H
						HMDB00666	3	Heptanoic acid	C7H14O2	M+H
						LMFA01020084	3	2-ethyl-pentanoic acid	C7H14O2	M+H
						LMFA01020083	3	5-methyl-hexanoic acid	C7H14O2	M+H
						HMDB39618	3	Propyl butyrate	C7H14O2	M+H
						LMFA07010673	3	Isopropyl butyrate	C7H14O2	M+H
						HMDB33745	3	Ethyl 2-methylbutyrate	C7H14O2	M+H
						LMFA12000014	3	2-hydroxy-Heptan-3-one	C7H14O2	M+H
						HMDB31528	3	Isopentyl acetate	C7H14O2	M+H
						HMDB31594	3	2-Methylhexanoic acid	C7H14O2	M+H
						LMFA12000021	3	3-Hydroxyheptan-2-one	C7H14O2	M+H
						LMFA01020145	3	34-dimethyl-pentanoic acid	C7H14O2	M+H
						LMFA01020081	3	3-methyl-hexanoic acid	C7H14O2	M+H
						LMFA07010433	3	formyl hexanoate	C7H14O2	M+H
						HMDB32874	3	Hexyl formate	C7H14O2	M+H
						HMDB34166	3	2-Methylbutyl acetate	C7H14O2	M+H
						HMDB36209	3	Propyl 2-methylpropanoate	C7H14O2	M+H
						HMDB30028	3	Ethyl isovalerate	C7H14O2	M+H
						LMFA07010942	3	methyl 2-methylpentanoate	C7H14O2	M+H
						LMFA01010007	3	heptanoic acid	C7H14O2	M+H
						LMFA07010506	3	ethyl 2-methyl-butanoate	C7H14O2	M+H
						LMFA07010881	3	ethyl pentanoate	C7H14O2	M+H
						LMFA01020146	3	2-ethyl-2-methyl-butanoic acid	C7H14O2	M+H
						LMFA01020080	3	2-methyl-hexanoic acid	C7H14O2	M+H
						HMDB40297	3	Ethyl pentanoate	C7H14O2	M+H
						LMFA07010953	3	methyl 4-methylpentanoate	C7H14O2	M+H
						HMDB34239	3	2-Methylpropyl propanoate	C7H14O2	M+H
						HMDB36238	3	Methyl 4-methylpentanoate	C7H14O2	M+H
						LMFA01020144	3	44-dimethyl-pentanoic acid	C7H14O2	M+H
						LMFA01020085	3	22-dimethyl-pentanoic acid	C7H14O2	M+H
						HMDB35238	3	Methyl hexanoate	C7H14O2	M+H
						LMFA07010567	3	2-Methylpropyl propionate	C7H14O2	M+H
						HMDB39095	3	Pentyl acetate	C7H14O2	M+H
						HMDB36237	3	Methyl ()-2-methylpentanoate	C7H14O2	M+H
						HMDB31600	3	()-2-Pentanol acetate	C7H14O2	M+H
						HMDB30052	3	Butyl propionate	C7H14O2	M+H
						LMFA01020082	3	4-methyl-hexanoic acid	C7H14O2	M+H
						HMDB31595	3	5-Methylhexanoic acid	C7H14O2	M+H
						HMDB39619	3	Isopropyl butyrate	C7H14O2	M+H
						LMFA07010176	3	Pentyl acetate	C7H14O2	M+H
						LMFA01020086	3	33-dimethyl-pentanoic acid	C7H14O2	M+H
						LMFA07010511	3	ethyl 3-methyl-butanoate	C7H14O2	M+H
						HMDB38227	3	Isopropyl 2-methylpropanoate	C7H14O2	M+H
						LMFA07010417	3	propionyl butyrate	C7H14O2	M+H
193.029	568.4	4	0	C20:1	-0.31993	No annotations available.
428.364	115.5	4	0.12	C20:1	0.415417	Expand group to view annotations.
					0.310755
					0.311119
						HMDB06351	3	Vaccenyl carnitine	C25H47NO4	M+H_[+2]
						LMFA07070096	3	3-(9Z)-octadec-9-enoyloxy-4-(trimethylazaniumyl)butanoate	C25H47NO4	M+H_[+2]
						HMDB05065	3	Oleoylcarnitine	C25H47NO4	M+H_[+2]
						LMFA07070063	3	3-(9E)-octadec-9-enoyloxy-4-(trimethylazaniumyl)butanoate	C25H47NO4	M+H_[+2]
						HMDB13338	3	11Z-Octadecenylcarnitine	C25H47NO4	M+H_[+2]
						HMDB06464	3	Elaidic carnitine	C25H47NO4	M+H_[+2]
480.309	235.5	4	0	C20:1	-0.345638	Expand group to view annotations.
						LMGP02050039	3	(2-aminoethoxy)(2R)-3-hydroxy-2-(11Z)-octadec-11-enoyloxypropoxyphosphinic acid	C23H46NO7P	M+H
						LMGP02050040	3	(2-aminoethoxy)(2R)-3-hydroxy-2-(9Z)-octadec-9-enoyloxypropoxyphosphinic acid	C23H46NO7P	M+H
						LMGP02050064	3	(2-aminoethoxy)(2R)-2-hydroxy-3-(11Z)-octadec-11-enoyloxypropoxyphosphinic acid	C23H46NO7P	M+H
						LMGP01050125	3	1-(9Z-pentadecenoyl)-glycero-3-phosphocholine	C23H46NO7P	M+H
						HMDB11475	3	LysoPE(0:018:1(11Z))	C23H46NO7P	M+H
						HMDB11476	3	LysoPE(0:018:1(9Z))	C23H46NO7P	M+H
						LMGP02050004	3	1-(9Z-octadecenoyl)-sn-glycero-3-phosphoethanolamine	C23H46NO7P	M+H
						HMDB11505	3	LysoPE(18:1(11Z)0:0)	C23H46NO7P	M+H
						HMDB11506	3	LysoPE(18:1(9Z)0:0)	C23H46NO7P	M+H
506.266	219.9	4	0	C20:1	-0.418025	No annotations available.
				C10:3	-0.353316
570.318	55.5	4	0	C20:1	-0.330368	Expand group to view annotations.
						HMDB34101	3	Adouetine Y	C34H40N4O4	M+H_[+1]
						HMDB01097	3	Protoporphyrinogen IX	C34H40N4O4	M+H_[+1]
						HMDB29342	3	Ceanothine E	C34H40N4O4	M+H_[+1]
						LMPR0106080005	3	(4alpha6beta8alpha9beta13alpha14beta16beta17beta)-616- bis(acetyloxy)-37-dioxo-29-nordammara-117(20)24-trien-21-oic acid	C33H44O8	M+H_[+1]
94.9633	469.4	5	0	C20:2	-0.31992	No annotations available.
159.027	45.4	5	0.007	C20:2	0.310249	Expand group to view annotations.
						HMDB33054	3	Ethyl isopropyl disulfide	C5H12S2	M+Na
						HMDB31160	3	1-Pentanesulfenothioic acid	C5H12S2	M+Na
						HMDB14581	3	Allopurinol	C5H4N4O	M+Na
						HMDB33053	3	Ethyl propyl disulfide	C5H12S2	M+Na
						HMDB00157	3	Hypoxanthine	C5H4N4O	M+Na
						HMDB00613	3	Erythronic acid	C4H8O5	M+Na
						HMDB00943	3	Threonic acid	C4H8O5	M+Na
196.105	254.9	5	0	C20:2	-0.305797	No annotations available.
261.188	52.8	5	0.05	C20:1	0.322144	No annotations available.
				C20:2	0.381412
270.963	35.6	5	0	C20:1	-0.330981	No annotations available.
				C20:2	-0.32262
287.053	77.5	5	0	C20:2	-0.320952	Expand group to view annotations.
						LMPK12111160	3	-	C15H10O6	M+H
						HMDB29711	3	Maritimetin	C15H10O6	M+H
						LMPK12110137	3	5723-Tetrahydroxyflavone	C15H10O6	M+H
						LMPK12110131	3	5725-Tetrahydroxyflavone	C15H10O6	M+H
						LMPK12110134	3	5726-Tetrahydroxyflavone	C15H10O6	M+H
						HMDB41702	3	7834-Tetrahydroxyisoflavone	C15H10O6	M+H
						LMPK12050327	3	-	C15H10O6	M+H
						LMPK12050251	3	5734-Tetrahydroxyisoflavone	C15H10O6	M+H
						HMDB41688	3	5674-Tetrahydroxyisoflavone	C15H10O6	M+H
						LMPK12130020	3	-	C15H10O6	M+H
						LMPK12110006	3	-	C15H10O6	M+H
						LMPK12111566	3	3347-Tetrahydroxyflavone	C15H10O6	M+H
						LMPK12111622	3	-	C15H10O6	M+H
						LMPK12130056	3	4746-Tetrahydroxyaurone	C15H10O6	M+H
						LMPK12050149	3	7824-Tetrahydroxyisoflavone	C15H10O6	M+H
						HMDB41658	3	3-Hydroxygenistein	C15H10O6	M+H
						LMPK12112802	3	-	C15H10O6	M+H
						HMDB05801	3	Kaempferol	C15H10O6	M+H
						LMPK12110051	3	7345-Tetrahydroxyflavone	C15H10O6	M+H
						LMPK12110941	3	-	C15H10O6	M+H
						LMPK12050062	3	-	C15H10O6	M+H
						HMDB34014	3	2-Hydroxygenistein	C15H10O6	M+H
						HMDB30543	3	Norartocarpetin	C15H10O6	M+H
						LMPK12111361	3	4578-Tetrahydroxyflavone	C15H10O6	M+H
						LMPK12113088	3	-	C15H10O6	M+H
						LMPK12111601	3	3784-Tetrahydroxyflavone	C15H10O6	M+H
						HMDB05800	3	Luteolin	C15H10O6	M+H
						LMPK12130041	3	-	C15H10O6	M+H
						HMDB34444	3	Citreorosein	C15H10O6	M+H
						LMPK12050386	3	-	C15H10O6	M+H
						LMPK12110003	3	-	C15H10O6	M+H
						HMDB34150	3	Cernuine	C15H10O6	M+H
314.674	555.9	5	0.007	C20:2	0.302809	No annotations available.
363.161	492.9	5	0.024	C10:3	0.306832	No annotations available.
				C20:2	0.337331
372.288	438.6	5	0.007	C20:2	0.316256	Expand group to view annotations.
						HMDB13658	3	Docosahexaenoyl Ethanolamide	C24H37NO2	M+H
						LMFA08040009	3	N-(4Z7Z10Z13Z16Z19Z-docosahexaenoyl)-ethanolamine	C24H37NO2	M+H
388.2	538.9	5	0.007	C20:2	0.300389	Expand group to view annotations.
						HMDB15293	3	Terazosin	C19H25N5O4	M+H
388.92	41.1	5	0	C20:2	-0.30898	No annotations available.
406.137	424.8	5	0	C20:2	-0.403499	No annotations available.
423.233	537.7	5	0.119	C20:2	0.42784	No annotations available.
				C20:1	0.403978
				C20:0	0.300171
427.211	418.8	5	0.007	C20:2	0.310943	Expand group to view annotations.
						LMPK12020243	3	-	C25H30O6	M+H
						LMPK12120531	3	24634-Pentahydroxy- 35-diprenyldihydrochalcone	C25H30O6	M+H
						LMPK12140117	3	(2S)-572-Trihydroxy-8-(5-hydroxy-2-isopropenyl-5-methylhexyl)flavanone	C25H30O6	M+H
						LMPK12120560	3	42346-Pentahydroxy-5-neryldihydrochalcone	C25H30O6	M+H
						HMDB15396	3	Paliperidone	C23H27FN4O3	M+H
						LMPK12120559	3	3-Geranyl-42456-pentahydroxydihydrochalcone	C25H30O6	M+H
441.338	308	5	0.175	C20:1	0.525283	Expand group to view annotations.
				C10:2	0.397274
				C20:2	0.470818
				C10:3	0.441583
				C20:0	0.301752
						LMST03020397	3	(5Z7E)-(1S3R20R)-2627-dimethyl-910-seco-5710(19)-cholestatrien-22-yne-1325-triol	C29H44O3	M+H
						HMDB12560	3	13-Hydroxy-alpha-tocotrienol	C29H44O3	M+H
						LMST01060016	3	6beta11alpha-dihydroxy-23-demethyl-gorgosta-24-dien-1-one	C29H44O3	M+H
						LMST03020623	3	(5Z7E24aE)-(1S3R)-24a24b-dihomo-910-seco-5710(19)24a-cholestatrien-1325-triol	C29H44O3	M+H
						LMST01040174	3	5alpha8alpha-epidioxy-stigmasta-69(11)22E-trien-3beta-ol	C29H44O3	M+H
						LMPR0106250001	3	-	C29H44O3	M+H
						LMST01060012	3	11alpha-hydroxy-5beta6beta-epoxy-23-demethylgorgost-2-en-1-one	C29H44O3	M+H
						LMST03020395	3	(5Z7E22E24E)-(1S3R)-24a24b-dihomo-910-seco-5710(19)2224-cholestapentaene-1325-triol	C29H44O3	M+H
						LMST03020396	3	(5Z7E)-(1S3R)-2627-dimethyl-910-seco-5710(19)-cholestatrien-22-yne-1325-triol	C29H44O3	M+H
						HMDB35730	3	Camelledionol	C29H44O3	M+H
						LMST03020394	3	(5Z7E)-(1S3R11S)-11-ethynyl-910-seco-5710(19)-cholestatriene-1325-triol	C29H44O3	M+H
						LMST03020583	3	(5Z7E)-(1S3R20S)-20-cyclopropyl-21-nor-910-seco-5710(19)16-cholestatetraene-1325-triol	C29H44O3	M+H
451.275	76.2	5	0.008	C20:2	0.340855	No annotations available.
459.246	524	5	0.059	C20:2	0.347127	Expand group to view annotations.
				C20:1	0.404486
						LMGP10050039	3	(1R)-1-(hydroxymethyl)-2-phosphonooxy-ethyl (5Z8Z11Z14Z)-icosa-581114-tetraenoate	C23H39O7P	M+H
						LMGP10050013	3	1-(5Z8Z11Z14Z-eicosatetraenoyl)-sn-glycero-3-phosphate	C23H39O7P	M+H
478.267	62.2	5	0.007	C20:2	0.305918	No annotations available.
488.229	51.2	5	0.007	C20:2	0.331265	No annotations available.
496.211	361.7	5	0	C20:2	-0.387425	No annotations available.
499.25	334.4	5	0.007	C20:2	0.300711	No annotations available.
512.355	546.4	5	0.049	C20:2	0.338653	No annotations available.
				C20:1	0.3293
572.709	46.7	5	0	C20:2	-0.396192	No annotations available.
581.901	600.1	5	0.008	C20:2	0.352437	No annotations available.
583.754	270.5	5	0.05	C20:2	0.378797	No annotations available.
				C20:1	0.326671
585.016	53.5	5	0.008	C20:2	0.338226	No annotations available.
647.675	533.1	5	0.007	C20:2	0.30031	No annotations available.
664.4	419.6	5	0.007	C20:2	0.318052	No annotations available.
734.017	579.8	5	0.007	C20:2	0.305439	No annotations available.
736.605	546.4	5	0.008	C20:2	0.358683	Expand group to view annotations.
						LMGL00000121	3	1-hexadecanoyl-2-(9Z12Z-octadecadienoyl)-3-O-(NNN-trimethyl) homoserine-glycerol	C44H81NO7	M+H
						LMGL00000126	3	1-hexadecanoyl-2-(9Z12Z-octadecadienoyl)-sn-glycero-3-O-(NNN-trimethyl)-homoserine	C44H81NO7	M+H
748.501	96.7	5	0	C20:0	-0.397217	No annotations available.
				C20:2	-0.347232
				C20:1	-0.311188
757.184	319.4	5	0.008	C20:2	0.349834	Expand group to view annotations.
						HMDB37373	3	Quercetin 3-(36-di-p-coumarylglucoside)	C39H32O16	M+H
						LMPK12112146	3	-	C39H32O16	M+H
784.52	559.1	5	0.007	C20:2	0.312452	Expand group to view annotations.
						LMGP03010378	3	1-(6Z9Z12Z-octadecatrienoyl)-2-(9Z-octadecenoyl)-glycero-3-phosphoserine	C42H74NO10P	M+H
						HMDB12361	3	PS(16:020:4(5Z8Z11Z14Z))	C42H74NO10P	M+H
						HMDB12392	3	PS(18:1(9Z)18:3(9Z12Z15Z))	C42H74NO10P	M+H
						LMGP03010874	3	1-(9Z12Z15Z-octadecatrienoyl)-2-(9Z-octadecenoyl)-glycero-3-phosphoserine	C42H74NO10P	M+H
						HMDB12402	3	PS(18:2(9Z12Z)18:2(9Z12Z))	C42H74NO10P	M+H
						LMGP03010880	3	1-(9Z-octadecenoyl)-2-(9Z12Z15Z-octadecatrienoyl)-glycero-3-phosphoserine	C42H74NO10P	M+H
						LMGP03010436	3	1-(6Z9Z12Z15Z-octadecatetraenoyl)-2-octadecanoyl-glycero-3-phosphoserine	C42H74NO10P	M+H
						HMDB12431	3	PS(20:4(5Z8Z11Z14Z)16:0)	C42H74NO10P	M+H
						LMGP03010789	3	1-(7Z10Z13Z16Z-docosatetraenoyl)-2-tetradecanoyl-glycero-3-phosphoserine	C42H74NO10P	M+H
						LMGP03010038	3	1-hexadecanoyl-2-(5Z8Z11Z14Z-eicosatetraenoyl)-sn-glycero-3-phosphoserine	C42H74NO10P	M+H
						HMDB12421	3	PS(20:3(8Z11Z14Z)16:1(9Z))	C42H74NO10P	M+H
						LMGP03010219	3	1-(9Z-hexadecenoyl)-2-(8Z11Z14Z-eicosatrienoyl)-glycero-3-phosphoserine	C42H74NO10P	M+H
						LMGP03010108	3	1-tetradecanoyl-2-(7Z10Z13Z16Z-docosatetraenoyl)-glycero-3-phosphoserine	C42H74NO10P	M+H
						LMGP03010596	3	1-(8Z11Z14Z-eicosatrienoyl)-2-(9Z-hexadecenoyl)-glycero-3-phosphoserine	C42H74NO10P	M+H
						LMGP03010330	3	1-(9Z-octadecenoyl)-2-(6Z9Z12Z-octadecatrienoyl)-glycero-3-phosphoserine	C42H74NO10P	M+H
						HMDB12412	3	PS(18:3(9Z12Z15Z)18:1(9Z))	C42H74NO10P	M+H
						HMDB12371	3	PS(16:1(9Z)20:3(8Z11Z14Z))	C42H74NO10P	M+H
						LMGP03010859	3	1-(5Z8Z11Z14Z-eicosatetraenoyl)-2-hexadecanoyl-glycero-3-phosphoserine	C42H74NO10P	M+H
						LMGP03010023	3	12-di-(9Z12Z-octadecadienoyl)-sn-glycero-3-phosphoserine	C42H74NO10P	M+H
						LMGP03010886	3	1-octadecanoyl-2-(6Z9Z12Z15Z-octadecatetraenoyl)-glycero-3-phosphoserine	C42H74NO10P	M+H
807.423	49.9	5	0	C20:2	-0.364616	Expand group to view annotations.
						HMDB38759	3	Licoricesaponin C2	C42H62O15	M+H
891.924	460.1	5	0.007	C20:2	0.307884	No annotations available.
1042.62	387.8	5	0	C20:2	-0.327126	No annotations available.
1046.51	506	5	0.008	C20:2	0.379074	No annotations available.
1049.2	483.1	5	0.007	C20:2	0.334182	No annotations available.
1063.25	591.7	5	0	C20:2	-0.317685	No annotations available.
1066.93	503.8	5	0	C20:2	-0.31421	No annotations available.
1096.79	591.1	5	0	C20:2	-0.335823	No annotations available.
1103.18	279.8	5	0	C20:2	-0.316808	No annotations available.
1116.42	33	5	0.007	C20:2	0.312184	No annotations available.
1136.93	484.1	5	0	C20:2	-0.311105	No annotations available.
1168.07	514	5	0.007	C20:2	0.331714	No annotations available.
1201.53	500.3	5	0.007	C20:2	0.320706	No annotations available.
1201.69	39.9	5	0.008	C20:2	0.341095	Expand group to view annotations.
						LMGP15010091	3	2-O-(alpha-D-Manp)-6-O-(alpha-D-Manp)-(1-(9Z-nonadecenoyl)-2-(9Z-octadecenoyl)-sn-glycero-3-phospho-1-myo-inositol)	C58H105O23P	M+H
						LMGP15010096	3	2-O-(alpha-D-Manp)-6-O-(alpha-D-Manp)-(1-(9Z12Z-nonadecadienoyl)-2-octadecanoyl-sn-glycero-3-phospho-1-myo-inositol)	C58H105O23P	M+H
1233.34	297.3	5	0	C20:2	-0.342173	No annotations available.
1235.91	279	5	0	C20:1	-0.326122	No annotations available.
				C20:2	-0.307598
1237.61	552.4	5	0.007	C20:2	0.335055	Expand group to view annotations.
						HMDB32780	3	Jujuboside C	C59H96O27	M+H
						HMDB35492	3	(3b16a)-Dihydroxy-12-oleanen-28-oic acid 3-glucosyl-(1-2)-arabinoside 28-rhamnosyl-(1-4)-glucosyl-(1-4)-glucosyl ester	C59H96O27	M+H
1240.2	278.2	5	0	C20:2	-0.439696	No annotations available.
1267.06	270.6	5	0	C20:2	-0.393195	No annotations available.
1276.28	32	5	0	C20:2	-0.320949	No annotations available.
1285.91	456.1	5	0	C20:1	-0.306818	Expand group to view annotations.
				C20:2	-0.37801
						LMPR01070110	3	-	C78H124O14	M+H
1290.68	34.1	5	0	C20:2	-0.301181	No annotations available.
1291.05	279.5	5	0	C20:2	-0.325822	No annotations available.
1324.67	557.6	5	0.048	C20:2	0.438165	No annotations available.
				C20:1	0.301174
1327.99	291.2	5	0	C20:2	-0.3387	No annotations available.
1354.6	270	5	0	C20:2	-0.304421	No annotations available.
				C20:1	-0.310142
1406.55	260.1	5	0	C20:2	-0.304084	No annotations available.
1417.12	277.1	5	0	C20:2	-0.306182	No annotations available.
1447.22	273.2	5	0.008	C20:2	0.370213	No annotations available.
1478.9	275.4	5	0	C20:2	-0.318322	No annotations available.
1523.21	274.9	5	0.007	C20:2	0.320298	No annotations available.
1531.41	275.3	5	0.047	C20:1	0.312307	No annotations available.
				C20:2	0.316906
1533.88	32	5	0	C20:2	-0.325445	Expand group to view annotations.
						LMSP0601EB03	3	KDNalpha2-3Galbeta1-3GlcNAcbeta1-3Galbeta1-4Glcbeta-Cer(d18:120:0)	C73H132N2O31	M+H
						LMSP0601EC03	3	KDNalpha2-6Galbeta1-3GlcNAcbeta1-3Galbeta1-4Glcbeta-Cer(d18:120:0)	C73H132N2O31	M+H
						LMSP0601GE03	3	KDNalpha2-3Galbeta1-4GlcNAcbeta1-3Galbeta1-4Glcbeta-Cer(d18:120:0)	C73H132N2O31	M+H
						LMSP0601GG03	3	KDNalpha2-6Galbeta1-4GlcNAcbeta1-3Galbeta1-4Glcbeta-Cer(d18:120:0)	C73H132N2O31	M+H
						LMSP0601DF03	3	Galbeta1-3GalNAcbeta1-4(KDNalpha2-3)Galbeta1-4Glcbeta-Cer(d18:120:0)	C73H132N2O31	M+H
						LMSP0601DD03	3	KDNalpha2-3Galbeta1-3GalNAcbeta1-4Galbeta1-4Glcbeta-Cer(d18:120:0)	C73H132N2O31	M+H
1553.75	549.1	5	0.052	C20:2	0.352533	No annotations available.
				C20:1	0.344876
1569.62	295.4	5	0	C20:2	-0.317528	Expand group to view annotations.
						LMGP15040045	3	2-O-(alpha-D-Manp)-6-O-(alpha-D-Manp-1-6-alpha-D-Manp-1-6-alpha-D-Manp-1-6-alpha-D-Manp-1-6-alpha-D-Manp)-(1-(9Z12Z-octadecadienoyl)-sn-glycero-3-phospho-1-myo-inositol)	C63H109O42P	M+H
1280.64	45.1	5	0.05	C20:1	0.331359	No annotations available.
				C20:2	0.344624
1493.62	44.8	5	0.048	C20:1	0.319459	No annotations available.
				C20:2	0.327125
1558.62	49.2	5	0.007	C20:2	0.315257	No annotations available.
