# Supplementary material for: Plasma acylcarnitine levels increase with healthy aging
Source: Aging (Albany NY). 2020 Jun 16;12(13):13555–70. doi: 10.18632/aging.103462 (PMC7377890; doi:10.18632/aging.103462)
Supplement: Supplementary Table 7 [file aging-12-103462-s005..xlsx]

## Sheet: Supplementary Table 7
Supplementary Table 7. Annotations of metabolites included in male network of metabolome-wide associations with the top 6 age-associated acylcarnitines (Figure 6B). Metabolites are listed by their network cluster. Strength and direction of association with respective acylcarnitines is provided by a correlation value adjacent to the matching acylcarnitine. For multiple annotations per metabolite, …
m/z	RT (s)	Cluster	Centrality_vec	Acylcarnitine	Correlation	Chemical ID	Schymanski level of confidence	Name	Formula	Adduct
124.018	488.2	1	0	C18OH	-0.336213	No annotations available.
214.618	517.1	1	0.003	C18OH	0.35306	No annotations available.
244.637	299	1	0	C20:2	-0.316348	No annotations available.
				C10:2	-0.302907
				C18OH	-0.358788
257.149	74.9	1	0.003	C18OH	0.328585	No annotations available.
261.216	47	1	0.058	C18OH	0.316446	No annotations available.
				C20:0	0.356813
273.638	304.6	1	0	C18OH	-0.317536	Expand group to view annotations.
						HMDB39122	3	Crocin 4	C27H36O9	M+ACN+2H
						LMFA03120005	3	methyl 4R12S20-triacetoxy-9-oxo-5Z7E10Z13Z-prostatetraenoate-cyclo812	C27H36O9	M+ACN+2H
						LMFA03120006	3	methyl 4R12S20-triacetoxy-9-oxo-5E7E10Z13Z-prostatetraenoate-cyclo812	C27H36O9	M+ACN+2H
						LMFA03120007	3	methyl 4R12S20-triacetoxy-9-oxo-5E7Z10Z13Z-prostatetraenoate-cyclo812	C27H36O9	M+ACN+2H
281.603	357	1	0.003	C18OH	0.32805	No annotations available.
310.634	366.1	1	0.002	C18OH	0.302514	No annotations available.
340.27	313.5	1	0	C18OH	-0.343895	No annotations available.
377.048	70.1	1	0	C18OH	-0.306286	No annotations available.
412.323	438.6	1	0.003	C18OH	0.307252	Expand group to view annotations.
412.323	438.6	1	0.003	C18OH	0.307252	LMFA08020128	3	N-(9Z-octadecenoyl)-glutamine	C23H42N2O4	M+H_[+1]
421.312	318.7	1	0.013	C20:2	0.306531	Expand group to view annotations.
				C10:2	0.31152
				C18OH	0.448827
						LMST03020390	3	(5Z7E)-(1S3R)-22-(3-methylphenyl)-2324-dinor-910-seco-5710(19)-cholatriene-13-diol	C29H40O2	M+H
431.296	210.2	1	0	C20:2	-0.334581	No annotations available.
				C18OH	-0.37778
				C20:1	-0.334512
433.311	298	1	0	C20:2	-0.313941	Expand group to view annotations.
				C18OH	-0.340596
						HMDB35091	3	beta-Citraurin	C30H40O2	M+H
						HMDB36885	3	3-Hydroxy-8-apo-epsilon-caroten-8-al	C30H40O2	M+H
						LMSP01080061	3	2S-guanidino-3R4R5S14R-tetrahydroxyicos-6E-enoic acid	C21H41N3O6	M+H_[+1]
						LMST03020127	3	(5Z7E)-(1S3R20R24R)-20-fluoro-2627-cyclo-910-seco-5710(19)-cholestatriene-1324-triol	C27H41FO3	M+H
						LMST03020128	3	(5Z7E)-(1S3R20S24R)-20-fluoro-2627-cyclo-910-seco-5710(19)-cholestatriene-1324-triol	C27H41FO3	M+H
						LMST03020129	3	(5Z7E)-(1S3R20R24S)-20-fluoro-2627-cyclo-910-seco-5710(19)-cholestatriene-1324-triol	C27H41FO3	M+H
						LMST03020130	3	(5Z7E)-(1S3R20S24S)-20-fluoro-2627-cyclo-910-seco-5710(19)-cholestatriene-1324-triol	C27H41FO3	M+H
434.293	561.3	1	0.003	C18OH	0.317657	Expand group to view annotations.
						LMFA08020086	3	N-(5Z8Z11Z14Z-eicosatetraenoyl)-glutamic acid	C25H39NO5	M+H
449.307	252.1	1	0	C18OH	-0.31931	Expand group to view annotations.
						HMDB39024	3	58-Epoxy-58-dihydro-3-hydroxy-8-apo-by-carotenal	C30H40O3	M+H
						HMDB39079	3	beta-Citraurin epoxide	C30H40O3	M+H
						LMST03020250	3	(7E)-(3S6R)-619-epithio-910-seco-5(10)7-cholestadien-3-ol SS-dioxide	C27H44O3S	M+H
						LMST03020251	3	(7E)-(3S6S)-619-epithio-910-seco-5(10)7-cholestadien-3-ol SS-dioxide	C27H44O3S	M+H
						LMST03020263	3	(5Z7E)-(1S3R)-24a-homo-910-seco-22-thia-5710(19)-cholestatriene-1325-triol	C27H44O3S	M+H
						LMST03020264	3	(5Z7E)-(1S3R20R)-24a-homo-910-seco-22-thia-5710(19)-cholestatriene-1325-triol	C27H44O3S	M+H
452.326	301.1	1	0	C18OH	-0.308227	No annotations available.
466.314	176.5	1	0	C18OH	-0.385154	Expand group to view annotations.
				C20:2	-0.320632
						HMDB00138	3	Glycocholic acid	C26H43NO6	M+H
						HMDB00331	3	3a7b12a-Trihydroxyoxocholanyl-Glycine	C26H43NO6	M+H
						HMDB32596	3	Sodium glycocholate	C26H43NO6	M+H
						LMST05030001	3	N-(3alpha7alpha12alpha-trihydroxy-5beta-cholan-24-oyl)-glycine	C26H43NO6	M+H
						LMST05030007	3	-	C26H43NO6	M+H
467.318	197.4	1	0	C20:2	-0.339316	Expand group to view annotations.
				C20:1	-0.324129
				C18OH	-0.357939
						HMDB00653	3	Cholesterol sulfate	C27H46O4S	M+H
						LMST05020016	3	cholest-5-en-3beta-yl hydrogen sulfate	C27H46O4S	M+H
468.217	298.1	1	0	C18OH	-0.373443	No annotations available.
489.27	296.9	1	0	C20:1	-0.352422	Expand group to view annotations.
				C18OH	-0.341205
				C20:2	-0.321032
						HMDB38732	3	alpha-Ionol O-arabinosyl-(1-6)-glucoside	C24H40O10	M+H
492.365	333.7	1	0.003	C18OH	0.348878	No annotations available.
495.402	514.6	1	0	C18OH	-0.331194	No annotations available.
498.937	46.1	1	0	C18OH	-0.354451	No annotations available.
504.261	199.9	1	0	C18OH	-0.377857	No annotations available.
555.808	50.3	1	0.003	C18OH	0.355442	No annotations available.
556.896	45.6	1	0	C18OH	-0.372355	No annotations available.
651.422	475.1	1	0.003	C18OH	0.353521	Expand group to view annotations.
651.422	475.1	1	0.003	C18OH	0.353521	LMGP04010048	3	1-dodecanoyl-2-(9Z-pentadecenoyl)-glycero-3-phospho-(1-sn-glycerol)	C33H63O10P	M+H
651.422	475.1	1	0.003	C18OH	0.353521	LMGP04010070	3	1-tridecanoyl-2-(9Z-tetradecenoyl)-glycero-3-phospho-(1-sn-glycerol)	C33H63O10P	M+H
651.422	475.1	1	0.003	C18OH	0.353521	LMGP04010110	3	1-(9Z-tetradecenoyl)-2-tridecanoyl-glycero-3-phospho-(1-sn-glycerol)	C33H63O10P	M+H
651.422	475.1	1	0.003	C18OH	0.353521	LMGP04010161	3	1-(9Z-pentadecenoyl)-2-dodecanoyl-glycero-3-phospho-(1-sn-glycerol)	C33H63O10P	M+H
664.056	259	1	0	C18OH	-0.366086	No annotations available.
665.44	510.2	1	0.002	C18OH	0.301747	Expand group to view annotations.
665.44	510.2	1	0.002	C18OH	0.301747	LMGP04010049	3	1-dodecanoyl-2-(9Z-hexadecenoyl)-glycero-3-phospho-(1-sn-glycerol)	C34H65O10P	M+H
665.44	510.2	1	0.002	C18OH	0.301747	LMGP04010071	3	1-tridecanoyl-2-(9Z-pentadecenoyl)-glycero-3-phospho-(1-sn-glycerol)	C34H65O10P	M+H
665.44	510.2	1	0.002	C18OH	0.301747	LMGP04010094	3	1-tetradecanoyl-2-(9Z-tetradecenoyl)-glycero-3-phospho-(1-sn-glycerol)	C34H65O10P	M+H
665.44	510.2	1	0.002	C18OH	0.301747	LMGP04010111	3	1-(9Z-tetradecenoyl)-2-tetradecanoyl-glycero-3-phospho-(1-sn-glycerol)	C34H65O10P	M+H
665.44	510.2	1	0.002	C18OH	0.301747	LMGP04010162	3	1-(9Z-pentadecenoyl)-2-tridecanoyl-glycero-3-phospho-(1-sn-glycerol)	C34H65O10P	M+H
665.44	510.2	1	0.002	C18OH	0.301747	LMGP04010201	3	1-(9Z-hexadecenoyl)-2-dodecanoyl-glycero-3-phospho-(1-sn-glycerol)	C34H65O10P	M+H
682.398	296.7	1	0	C18OH	-0.358306	No annotations available.
737.614	256.1	1	0	C18OH	-0.341535	No annotations available.
767.724	583.7	1	0.003	C18OH	0.311989	No annotations available.
795.32	297.9	1	0	C18OH	-0.311167	No annotations available.
841.646	585.2	1	0.003	C18OH	0.357162	No annotations available.
874.974	460.1	1	0	C18OH	-0.301985	No annotations available.
899.633	300.5	1	0	C20:1	-0.353805	No annotations available.
				C20:2	-0.320654
				C18OH	-0.466166
921.613	299	1	0	C18OH	-0.346688	No annotations available.
947.436	595.1	1	0	C18OH	-0.30632	No annotations available.
952.63	382.9	1	0.003	C18OH	0.383101	No annotations available.
962.494	539.1	1	0.003	C18OH	0.335968	No annotations available.
979.83	280.7	1	0	C18OH	-0.409322	No annotations available.
980.386	277.3	1	0	C20:2	-0.386738	No annotations available.
				C10:3	-0.331596
				C18OH	-0.493402
1020.57	589.4	1	0.003	C18OH	0.393678	No annotations available.
1030.2	528.4	1	0	C18OH	-0.317841	No annotations available.
1093.3	280.6	1	0	C18OH	-0.318274	No annotations available.
1096.28	497.5	1	0.003	C18OH	0.319857	No annotations available.
1098.5	504.5	1	0.003	C18OH	0.327031	Expand group to view annotations.
						HMDB36551	3	Cyclolinopeptide G	C56H75N9O10S2	M+H
1103.93	274.7	1	0	C18OH	-0.351546	No annotations available.
1109.18	275.1	1	0	C18OH	-0.309039	No annotations available.
1115.13	378.1	1	0.003	C18OH	0.327563	No annotations available.
1141.65	42.5	1	0	C18OH	-0.352494	No annotations available.
1143.77	463	1	0.003	C18OH	0.318965	No annotations available.
1167.29	471.7	1	0	C18OH	-0.356955	No annotations available.
1175.59	501.4	1	0	C18OH	-0.308089	Expand group to view annotations.
						LMPR0106150038	3	alpha-L-arabinopyranosyl-(1-4)-alpha-L-arabinopyranosyl-(1-3)-beta-D-xylopyranosyl-(1-4)-6-deoxy-alpha-L-mannopyranosyl-(1-2)-6-deoxy-1-O-(3beta16alpha)-316-dihydroxy-2328-dioxoolean-12-en-28-yl-beta-D-galactopyranose	C57H90O25	M+H
1213.73	35.4	1	0.002	C18OH	0.30002	No annotations available.
1218.24	36.2	1	0.003	C18OH	0.345589	No annotations available.
1226.34	282	1	0	C18OH	-0.313366	No annotations available.
1236.62	273.7	1	0	C18OH	-0.312034	No annotations available.
1292.6	31.9	1	0.003	C18OH	0.32452	No annotations available.
1333.74	287	1	0	C18OH	-0.334651	No annotations available.
1372.83	517.5	1	0.003	C18OH	0.326387	No annotations available.
1378.54	278.2	1	0	C18OH	-0.340227	No annotations available.
1379.09	280.5	1	0	C18OH	-0.374815	No annotations available.
1424.05	272.8	1	0.003	C18OH	0.314993	No annotations available.
1437.24	283.3	1	0.003	C18OH	0.391508	No annotations available.
1438.15	285.6	1	0	C20:2	-0.304689	No annotations available.
				C18OH	-0.321214
1515.2	32.4	1	0	C18OH	-0.321623	No annotations available.
1595.83	36.1	1	0	C18OH	-0.308612	No annotations available.
1726.38	293.8	1	0	C18OH	-0.393462	No annotations available.
1777.65	263.2	1	0	C18OH	-0.343294	No annotations available.
150.977	118	1	0	C18OH	-0.361301	No annotations available.
181.954	569.5	1	0	C18OH	-0.348929	No annotations available.
275.633	521.8	1	0.003	C18OH	0.304165	No annotations available.
289.135	404.7	1	0.003	C18OH	0.304274	No annotations available.
373.314	65.9	1	0.074	C18OH	0.366035	No annotations available.
				C20:2	0.30496
				C20:0	0.308498
				C20:1	0.368976
384.204	54.2	1	0.003	C18OH	0.315533	No annotations available.
412.285	341.7	1	0	C20:0	-0.322302	Expand group to view annotations.
				C18OH	-0.371096
						HMDB15648	3	Fesoterodine	C26H37NO3	M+H
414.358	129.6	1	0.003	C18OH	0.395693	Expand group to view annotations.
						HMDB06210	3	Heptadecanoyl carnitine	C24H47NO4	M+H
						LMFA07070067	3	3-(heptadecanoyloxy)-4-(trimethylazaniumyl)butanoate	C24H47NO4	M+H
415.304	333.4	1	0	C18OH	-0.302824	No annotations available.
431.299	329.1	1	0	C18OH	-0.328631	Expand group to view annotations.
						HMDB00653	3	Cholesterol sulfate	C27H46O4S	M+H-2H2O
						HMDB39024	3	58-Epoxy-58-dihydro-3-hydroxy-8-apo-by-carotenal	C30H40O3	M+H-H2O
						HMDB39079	3	beta-Citraurin epoxide	C30H40O3	M+H-H2O
						LMST03020250	3	(7E)-(3S6R)-619-epithio-910-seco-5(10)7-cholestadien-3-ol SS-dioxide	C27H44O3S	M+H-H2O
						LMST03020251	3	(7E)-(3S6S)-619-epithio-910-seco-5(10)7-cholestadien-3-ol SS-dioxide	C27H44O3S	M+H-H2O
						LMST03020263	3	(5Z7E)-(1S3R)-24a-homo-910-seco-22-thia-5710(19)-cholestatriene-1325-triol	C27H44O3S	M+H-H2O
						LMST03020264	3	(5Z7E)-(1S3R20R)-24a-homo-910-seco-22-thia-5710(19)-cholestatriene-1325-triol	C27H44O3S	M+H-H2O
						LMST05020016	3	cholest-5-en-3beta-yl hydrogen sulfate	C27H46O4S	M+H-2H2O
436.299	531.9	1	0	C18OH	-0.32363	Expand group to view annotations.
						HMDB37183	3	Polysorbate 60	C22H42O8	M+H_[+1]
						LMST03020049	3	(5E7E)-(1R3R)-125-dihydroxy-910-seco-3-thia-5710(19)-cholestatriene 3-oxide	C26H42O3S	M+H_[+1]
						LMST03020050	3	(5E7E)-(1R3S)-125-dihydroxy-910-seco-3-thia-5710(19)-cholestatriene 3-oxide	C26H42O3S	M+H_[+1]
						LMST03020051	3	(5Z7E)-(1R3R)-125-dihydroxy-910-seco-3-thia-5710(19)-cholestatriene 3-oxide	C26H42O3S	M+H_[+1]
						LMST03020052	3	(5Z7E)-(1R3S)-125-dihydroxy-910-seco-3-thia-5710(19)-cholestatrien 3-oxide	C26H42O3S	M+H_[+1]
						LMST03020053	3	(5Z7E)-(1S3R)-910-seco-22-thia-5710(19)-cholestatriene-1325-triol	C26H42O3S	M+H_[+1]
						LMST03020054	3	(5Z7E)-(1S3R20R)-910-seco-22-thia-5710(19)-cholestatriene-1325-triol	C26H42O3S	M+H_[+1]
						LMST03020055	3	(5Z7E)-(1S3R)-910-seco-23-thia-5710(19)-cholestatriene-1325-triol	C26H42O3S	M+H_[+1]
450.321	501.3	1	0	C18OH	-0.378778	No annotations available.
451.325	502.2	1	0	C18OH	-0.302507	Expand group to view annotations.
						LMSP01060003	3	heptadecasphing-4-enine-1-phosphocholine	C22H47N2O5P	M+H
466.316	333.3	1	0	C20:2	-0.307501	Expand group to view annotations.
				C20:1	-0.306803
				C18OH	-0.395416
						HMDB00138	3	Glycocholic acid	C26H43NO6	M+H
						HMDB00331	3	3a7b12a-Trihydroxyoxocholanyl-Glycine	C26H43NO6	M+H
						HMDB32596	3	Sodium glycocholate	C26H43NO6	M+H
						LMST05030001	3	N-(3alpha7alpha12alpha-trihydroxy-5beta-cholan-24-oyl)-glycine	C26H43NO6	M+H
						LMST05030007	3	-	C26H43NO6	M+H
467.32	328.2	1	0	C18OH	-0.362185	Expand group to view annotations.
						HMDB00138	3	Glycocholic acid	C26H43NO6	M+H_[+1]
						HMDB00331	3	3a7b12a-Trihydroxyoxocholanyl-Glycine	C26H43NO6	M+H_[+1]
						HMDB00653	3	Cholesterol sulfate	C27H46O4S	M+H
						HMDB32596	3	Sodium glycocholate	C26H43NO6	M+H_[+1]
						LMST05020016	3	cholest-5-en-3beta-yl hydrogen sulfate	C27H46O4S	M+H
						LMST05030001	3	N-(3alpha7alpha12alpha-trihydroxy-5beta-cholan-24-oyl)-glycine	C26H43NO6	M+H_[+1]
						LMST05030007	3	-	C26H43NO6	M+H_[+1]
501.03	406.5	1	0	C18OH	-0.346958	No annotations available.
894.476	53.2	1	0.003	C18OH	0.334515	No annotations available.
1458.6	45.3	1	0.003	C18OH	0.30581	No annotations available.
100.052	526.3	2	0.059	C20:0	0.377015	No annotations available.
143.933	536.8	2	0.05	C20:0	0.320637	No annotations available.
163.061	49.8	2	0.05	C20:0	0.321284	Expand group to view annotations.
						HMDB00122	3	D-Glucose	C6H12O6	M+H-H2O
						HMDB00143	3	D-Galactose	C6H12O6	M+H-H2O
						HMDB00169	3	D-Mannose	C6H12O6	M+H-H2O
						HMDB00211	3	Myoinositol	C6H12O6	M+H-H2O
						HMDB00346	3	3-Deoxyarabinohexonic acid	C6H12O6	M+H-H2O
						HMDB00516	3	Beta-D-Glucose	C6H12O6	M+H-H2O
						HMDB00660	3	D-Fructose	C6H12O6	M+H-H2O
						HMDB01151	3	Allose	C6H12O6	M+H-H2O
						HMDB01266	3	L-Sorbose	C6H12O6	M+H-H2O
						HMDB01860	3	Paraxanthine	C7H8N4O2	M+H-H2O
						HMDB01889	3	Theophylline	C7H8N4O2	M+H-H2O
						HMDB02825	3	Theobromine	C7H8N4O2	M+H-H2O
						HMDB03345	3	Alpha-D-Glucose	C6H12O6	M+H-H2O
						HMDB03418	3	D-Tagatose	C6H12O6	M+H-H2O
						HMDB03449	3	Beta-D-Galactose	C6H12O6	M+H-H2O
						HMDB06088	3	Scyllitol	C6H12O6	M+H-H2O
						HMDB12326	3	L-Gulose	C6H12O6	M+H-H2O
						HMDB32222	3	Dihydroxyacetone (dimer)	C6H12O6	M+H-H2O
						HMDB33704	3	L-Galactose	C6H12O6	M+H-H2O
						HMDB34220	3	Levoinositol	C6H12O6	M+H-H2O
						HMDB00321	3	2-Hydroxyadipic acid	C6H10O5	M+H
						HMDB00345	3	3-Hydroxyadipic acid	C6H10O5	M+H
						HMDB00355	3	3-Hydroxymethylglutaric acid	C6H10O5	M+H
						HMDB00368	3	2(R)-Hydroxyadipic acid	C6H10O5	M+H
						HMDB00640	3	Levoglucosan	C6H10O5	M+H
						HMDB29934	3	D-1-Deoxy-erythro-hexo-23-diulose	C6H10O5	M+H
						HMDB32873	3	Diethyl dicarbonate	C6H10O5	M+H
						HMDB34426	3	(-)-1-Methylpropyl 1-propenyl disulfide	C7H14S2	M+H
						HMDB41561	3	D-15-Anhydrofructose	C6H10O5	M+H
						HMDB59758	3	2-Hydroxy-2-ethylsuccinic acid	C6H10O5	M+H
						LMFA01050454	3	(2R)-2-ethyl-2-hydroxybutanedioic acid	C6H10O5	M+H
						LMFA01050470	3	2-hydroxy-23-dimethylbutanedioic acid	C6H10O5	M+H
						LMFA01170049	3	2-hydroxy-Hexanedioic acid	C6H10O5	M+H
						LMFA01170050	3	2S-hydroxy-Hexanedioic acid	C6H10O5	M+H
						LMFA01170088	3	3-hydroxy-hexanedioic acid	C6H10O5	M+H
						LMFA01170091	3	3-(hydroxy-methyl)-pentanedioic acid	C6H10O5	M+H
197.29	56.8	2	0.048	C20:0	0.31042	No annotations available.
207.637	103.1	2	0	C20:0	-0.30057	No annotations available.
225.934	34.7	2	0.048	C20:0	0.306941	No annotations available.
243.15	100.4	2	0	C20:0	-0.333963	No annotations available.
257.16	45.5	2	0.049	C20:0	0.314483	No annotations available.
261.887	34.4	2	0.064	C20:0	0.409062	No annotations available.
276.094	340.9	2	0.053	C20:0	0.343229	No annotations available.
280.889	45	2	0.053	C20:0	0.338372	No annotations available.
280.913	23.1	2	0.064	C20:0	0.410974	No annotations available.
282.111	334.5	2	0.047	C20:0	0.300666	Expand group to view annotations.
						HMDB33954	3	Juzirine	C17H15NO3	M+H
						HMDB40693	3	N2-(gamma-Glutamyl)-4-carboxyphenylhydrazine	C12H15N3O5	M+H
289.087	51.7	2	0.049	C20:0	0.317369	Expand group to view annotations.
						HMDB34449	3	Hydroxyanigorufone	C19H12O3	M+H
						HMDB40716	3	Irenolone	C19H12O3	M+H
296.187	100.5	2	0	C20:0	-0.339776	Expand group to view annotations.
						HMDB14333	3	Esmolol	C16H25NO4	M+H
308.184	65	2	0.05	C20:0	0.318817	Expand group to view annotations.
						HMDB41906	3	Ibopamine	C17H25NO4	M+H
318.696	99.4	2	0	C20:0	-0.433749	No annotations available.
329.115	522.4	2	0.055	C20:0	0.354187	No annotations available.
339.008	131.6	2	0.047	C20:0	0.303836	No annotations available.
349.294	438.5	2	0.059	C20:0	0.378819	No annotations available.
353.215	100.3	2	0	C20:0	-0.362856	No annotations available.
356.746	77.9	2	0	C20:0	-0.32101	No annotations available.
358.284	307.2	2	0	C20:0	-0.301934	No annotations available.
358.722	80.7	2	0	C20:0	-0.313165	No annotations available.
364.341	448.2	2	0.049	C20:0	0.313857	No annotations available.
365.701	95.9	2	0	C20:0	-0.332493	No annotations available.
366.709	81.6	2	0	C20:0	-0.305564	No annotations available.
370.246	77.9	2	0	C20:0	-0.334124	No annotations available.
378.255	89.4	2	0	C20:0	-0.407265	Expand group to view annotations.
						HMDB41891	3	Famprofazone	C24H31N3O	M+H
380.734	84.8	2	0	C20:0	-0.368419	No annotations available.
382.237	85.8	2	0	C20:0	-0.333094	No annotations available.
383.743	93.4	2	0	C20:0	-0.351027	No annotations available.
386.941	43.6	2	0.057	C20:0	0.366818	No annotations available.
388.722	78.3	2	0	C20:0	-0.381031	Expand group to view annotations.
						HMDB34327	3	Glucoconvallasaponin B	C38H62O15	M+H+NH4
393.249	94.3	2	0	C20:0	-0.332053	No annotations available.
394.924	48.3	2	0.047	C20:0	0.303345	No annotations available.
400.77	87.4	2	0	C20:0	-0.367851	Expand group to view annotations.
						LMGP06010860	3	1-octadecanoyl-2-dodecanoyl-glycero-3-phospho-(1-myo-inositol)	C39H75O13P	M+H+NH4
						LMGP06010868	3	1-heptadecanoyl-2-tridecanoyl-glycero-3-phospho-(1-myo-inositol)	C39H75O13P	M+H+NH4
						LMGP06010907	3	1-tridecanoyl-2-heptadecanoyl-glycero-3-phospho-(1-myo-inositol)	C39H75O13P	M+H+NH4
						LMGP06010913	3	1-dodecanoyl-2-octadecanoyl-glycero-3-phospho-(1-myo-inositol)	C39H75O13P	M+H+NH4
						LMGP06010945	3	1-hexadecanoyl-2-tetradecanoyl-glycero-3-phospho-(1-myo-inositol)	C39H75O13P	M+H+NH4
						LMGP06010947	3	12-dipentadecanoyl-sn-glycero-3-phospho-(1-myo-inositol)	C39H75O13P	M+H+NH4
						LMGP06010948	3	1-tetradecanoyl-2-hexadecanoyl-glycero-3-phospho-(1-myo-inositol)	C39H75O13P	M+H+NH4
405.783	100.1	2	0	C20:0	-0.30847	No annotations available.
410.734	83	2	0	C20:0	-0.35227	No annotations available.
412.205	90.8	2	0	C20:0	-0.307347	Expand group to view annotations.
						HMDB15172	3	Carphenazine	C23H29N3O2S	M+H
						HMDB15196	3	Acetophenazine	C23H29N3O2S	M+H
416.255	61.7	2	0	C20:0	-0.339868	No annotations available.
421.162	62.2	2	0.048	C20:0	0.307787	Expand group to view annotations.
						HMDB29505	3	Kuwanon A	C25H24O6	M+H
						HMDB29506	3	Kuwanon B	C25H24O6	M+H
						HMDB30688	3	Cyclomulberrin	C25H24O6	M+H
						HMDB36631	3	Morusin	C25H24O6	M+H
						HMDB40480	3	Cyclocommunin	C25H24O6	M+H
						LMPK12020012	3	-	C25H24O6	M+H
						LMPK12050178	3	-	C25H24O6	M+H
						LMPK12050180	3	-	C25H24O6	M+H
						LMPK12050214	3	-	C25H24O6	M+H
						LMPK12050216	3	-	C25H24O6	M+H
						LMPK12050244	3	-	C25H24O6	M+H
						LMPK12050246	3	-	C25H24O6	M+H
						LMPK12050247	3	-	C25H24O6	M+H
						LMPK12050250	3	573-Trihydroxy-6-prenyl-66-dimethylpyrano23:45isoflavone	C25H24O6	M+H
						LMPK12050314	3	-	C25H24O6	M+H
						LMPK12050315	3	-	C25H24O6	M+H
						LMPK12050322	3	572-Trihydroxy-6-prenyl-66-dimethylpyrano23:43isoflavone	C25H24O6	M+H
						LMPK12050324	3	524-Trihydroxy-3-prenyl-66-dimethylpyrano23:76isoflavone	C25H24O6	M+H
						LMPK12100082	3	-	C25H24O6	M+H
						LMPK12110428	3	-	C25H24O6	M+H
						LMPK12110890	3	-	C25H24O6	M+H
						LMPK12110912	3	-	C25H24O6	M+H
						LMPK12110914	3	-	C25H24O6	M+H
						LMPK12110917	3	-	C25H24O6	M+H
						LMPK12110918	3	-	C25H24O6	M+H
						LMPK12110926	3	-	C25H24O6	M+H
						LMPK12110932	3	-	C25H24O6	M+H
						LMPK12110934	3	-	C25H24O6	M+H
						LMPK12111564	3	-	C25H24O6	M+H
						LMPK12140524	3	(2S)-57-Dihydroxy-bis(66-dimethylpyrano23:2323:45flavanone	C25H24O6	M+H
						LMPK12160006	3	-	C25H24O6	M+H
423.283	79.8	2	0	C20:0	-0.329344	Expand group to view annotations.
						HMDB11142	3	DHAP(18:0e)	C21H43O6P	M+H
						LMGP10070002	3	1-(1Z-octadecenyl)-glycero-3-phosphate	C21H43O6P	M+H
426.244	438.8	2	0	C20:0	-0.322081	No annotations available.
426.996	86	2	0.056	C20:0	0.360357	No annotations available.
427.794	98.6	2	0	C20:0	-0.302058	No annotations available.
428.284	86	2	0	C20:0	-0.375701	No annotations available.
432.748	80.4	2	0	C20:0	-0.300634	No annotations available.
434.218	98	2	0	C20:0	-0.391857	Expand group to view annotations.
						HMDB10341	3	Dextrorphan O-glucuronide	C23H31NO7	M+H
						HMDB14826	3	Mycophenolate mofetil	C23H31NO7	M+H
440.803	100.3	2	0	C20:0	-0.325142	No annotations available.
441.267	100.7	2	0	C20:0	-0.400017	No annotations available.
454.255	100.2	2	0	C20:0	-0.37106	Expand group to view annotations.
						HMDB13656	3	15-deoxy-delta1214-Prostaglandin J2-2-glycerol ester	C23H34O5	M+ACN+Na
						HMDB14518	3	Treprostinil	C23H34O5	M+ACN+Na
						HMDB33400	3	Annoglabasin A	C23H34O5	M+ACN+Na
						HMDB40953	3	Tussilagone	C23H34O5	M+ACN+Na
						HMDB60731	3	Digoxigenin	C23H34O5	M+ACN+Na
						LMFA03010202	3	methyl 9-oxo-11R-hydroxy-15R-acetoxy-5Z1013E-prostatrienoate	C23H34O5	M+ACN+Na
						LMST01120003	3	3beta1416beta-trihydroxy-5beta-card-20(22)-enolide	C23H34O5	M+ACN+Na
						LMST01120008	3	3beta12beta14-trihydroxy-5beta-card-20(22)-enolide	C23H34O5	M+ACN+Na
455.37	549.1	2	0.049	C20:0	0.316859	No annotations available.
458.786	83.8	2	0	C20:0	-0.302856	No annotations available.
459.379	567.4	2	0.048	C20:0	0.309959	No annotations available.
462.816	103.7	2	0	C20:0	-0.338853	No annotations available.
464.28	281.8	2	0	C20:0	-0.308557	Expand group to view annotations.
						LMGP02050016	3	1-(9Z12Z-heptadecadienoyl)-glycero-3-phosphoethanolamine	C22H42NO7P	M+H
464.984	45.4	2	0.07	C20:0	0.447896	No annotations available.
468.189	50.8	2	0.057	C20:0	0.366632	Expand group to view annotations.
						HMDB31949	3	Bis-N-butyl phthalate	C22H29NO10	M+H
473.312	87.1	2	0	C20:0	-0.381043	No annotations available.
474.325	70.8	2	0	C20:0	-0.336229	No annotations available.
475.228	538.8	2	0.049	C20:0	0.312434	No annotations available.
476.215	442.9	2	0	C20:0	-0.36452	No annotations available.
476.773	86.1	2	0	C20:0	-0.34743	No annotations available.
481.219	329.6	2	0.049	C20:0	0.315691	No annotations available.
493.238	86.4	2	0	C20:0	-0.384181	Expand group to view annotations.
						HMDB60123	3	rac-56-Epoxy-retinoyl-beta-D-glucuronide	C26H36O9	M+H
498.448	545	2	0.055	C20:0	0.354953	No annotations available.
498.743	441.1	2	0	C20:0	-0.315108	No annotations available.
499.309	87.2	2	0	C20:0	-0.391174	Expand group to view annotations.
						LMST01010116	3	-	C30H42O6	M+H
508.247	428.4	2	0.051	C20:0	0.329276	No annotations available.
508.469	533.4	2	0.049	C20:0	0.315584	Expand group to view annotations.
						LMSP02010022	3	N-(tetradecanoyl)-4E14Z-sphingadienine	C32H61NO3	M+H
						LMSP02010035	3	N-(9Z-octadecenoyl)-tetradecasphing-4-enine	C32H61NO3	M+H
						LMSP02010052	3	N-(octadecanoyl)-4E6E-tetradecasphingadienine	C32H61NO3	M+H
512.307	108	2	0	C20:0	-0.355288	No annotations available.
513.467	566.5	2	0.054	C20:0	0.344165	Expand group to view annotations.
						HMDB31910	3	Chatenaytrienin 1	C35H60O2	M+H
						HMDB32647	3	Chatenaytrienin 2	C35H60O2	M+H
515.846	100.1	2	0	C20:0	-0.356087	No annotations available.
519.355	73.8	2	0	C20:0	-0.335707	No annotations available.
521.291	86.2	2	0	C20:0	-0.454239	Expand group to view annotations.
						LMST01010116	3	-	C30H42O6	M+Na
524.346	109.4	2	0	C20:0	-0.318018	No annotations available.
531.218	310.1	2	0.062	C20:0	0.397838	Expand group to view annotations.
						HMDB32834	3	7-Acetoxy-6-hydroxylimonin	C28H34O10	M+H
537.264	87.7	2	0	C20:0	-0.335865	No annotations available.
539.96	347	2	0	C20:0	-0.333221	No annotations available.
550.726	440.6	2	0	C20:0	-0.426651	No annotations available.
550.798	502.4	2	0	C20:0	-0.380009	No annotations available.
550.869	111.5	2	0	C20:0	-0.304653	No annotations available.
557.766	435.5	2	0	C20:0	-0.350468	No annotations available.
560.021	61.4	2	0.049	C20:0	0.317847	No annotations available.
563.381	74.9	2	0	C20:0	-0.332741	No annotations available.
565.785	438.6	2	0	C20:0	-0.360036	No annotations available.
576.37	114.7	2	0	C20:0	-0.349181	No annotations available.
579.315	56.3	2	0	C20:0	-0.316093	No annotations available.
583.305	73.6	2	0	C20:0	-0.332742	No annotations available.
589.395	90.7	2	0	C20:0	-0.371919	No annotations available.
592.387	452.5	2	0.055	C20:0	0.352761	No annotations available.
592.468	446.6	2	0.05	C20:0	0.324405	No annotations available.
594.823	497.2	2	0	C20:0	-0.38583	No annotations available.
596.299	497	2	0	C20:0	-0.32918	No annotations available.
598.413	90.3	2	0	C20:0	-0.408265	No annotations available.
598.658	542.8	2	0	C20:0	-0.317688	No annotations available.
610.346	81.2	2	0	C20:0	-0.416149	Expand group to view annotations.
						HMDB41368	3	24-Acetyl- 25-cinnamoylvulgaroside	C36H48O8	M+H_[+1]
613.668	540.9	2	0	C20:0	-0.300252	No annotations available.
617.305	580.4	2	0	C20:0	-0.310604	No annotations available.
620.843	494	2	0	C20:0	-0.346769	No annotations available.
626.051	363.2	2	0.049	C20:0	0.315918	No annotations available.
626.686	347.4	2	0	C20:0	-0.340352	No annotations available.
627.245	461.9	2	0	C20:0	-0.424539	No annotations available.
630.337	362.2	2	0	C20:0	-0.339108	No annotations available.
631.831	486.9	2	0	C20:0	-0.339757	No annotations available.
638.87	313.6	2	0	C20:0	-0.335152	No annotations available.
640.102	56.5	2	0.047	C20:0	0.302174	No annotations available.
642.439	92.3	2	0	C20:0	-0.425214	Expand group to view annotations.
						HMDB35101	3	Lansioside A	C38H61NO8	M+H-H2O
643.019	535.6	2	0	C20:0	-0.366188	No annotations available.
649.306	550.8	2	0	C20:0	-0.340873	No annotations available.
654.563	557.4	2	0.048	C20:0	0.306917	No annotations available.
659.445	515.4	2	0.069	C20:0	0.440771	No annotations available.
660.45	94.2	2	0	C20:0	-0.419358	Expand group to view annotations.
						HMDB35101	3	Lansioside A	C38H61NO8	M+H
661.831	485	2	0	C20:0	-0.333133	No annotations available.
663.308	484.3	2	0	C20:0	-0.353256	No annotations available.
668.396	57.8	2	0	C20:0	-0.346396	No annotations available.
670.414	355.3	2	0.052	C20:0	0.331018	No annotations available.
671.27	460	2	0	C20:0	-0.375648	No annotations available.
671.356	75.5	2	0	C20:0	-0.33597	No annotations available.
671.422	443.9	2	0.065	C20:0	0.414536	No annotations available.
674.429	437.2	2	0.052	C20:0	0.331986	No annotations available.
675.827	562	2	0	C20:0	-0.344162	No annotations available.
680.44	50	2	0	C20:0	-0.308996	No annotations available.
687.467	94	2	0	C20:0	-0.419118	No annotations available.
692.329	558	2	0	C20:0	-0.341185	No annotations available.
694.596	565.7	2	0.053	C20:0	0.337373	No annotations available.
695.035	55	2	0.051	C20:0	0.327961	No annotations available.
698.398	90.7	2	0	C20:0	-0.303622	No annotations available.
701.722	438.5	2	0	C20:0	-0.305831	No annotations available.
708.728	337.3	2	0	C20:0	-0.33064	Expand group to view annotations.
						LMSP02020028	3	N-(hexacosanoyl)-eicosasphinganine	C46H93NO3	M+H
711.008	56.6	2	0.051	C20:0	0.324774	No annotations available.
711.85	40.2	2	0.049	C20:0	0.316044	No annotations available.
715.297	455.3	2	0	C20:0	-0.384335	No annotations available.
718.732	503.8	2	0	C20:0	-0.310943	No annotations available.
731.27	455.3	2	0	C20:0	-0.312431	No annotations available.
731.495	95.5	2	0	C20:0	-0.418583	Expand group to view annotations.
						LMPR01070057	3	-	C46H66O7	M+H
						LMPR01070173	3	-	C46H66O7	M+H
						LMPR01070225	3	-	C46H66O7	M+H
734.671	323.4	2	0	C20:0	-0.332151	No annotations available.
735.42	358.1	2	0	C20:0	-0.30515	No annotations available.
735.933	482.6	2	0	C20:0	-0.312019	No annotations available.
737.342	453.7	2	0	C20:0	-0.343806	No annotations available.
740.487	79.4	2	0	C20:0	-0.332781	Expand group to view annotations.
						LMGP03030015	3	1-(1Z-hexadecenyl)-2-(6Z9Z12Z15Z-octadecatetraenoyl)-glycero-3-phosphoserine	C40H70NO9P	M+H
744.977	57.5	2	0.051	C20:0	0.327834	No annotations available.
752.861	479.8	2	0	C20:0	-0.322669	No annotations available.
757.944	480	2	0	C20:0	-0.324614	No annotations available.
759.951	413.3	2	0	C20:0	-0.317403	No annotations available.
774.378	515.5	2	0	C20:0	-0.308828	Expand group to view annotations.
						LMGP15040008	3	2-O-(alpha-D-Manp)-(1-(9Z12Z-nonadecadienoyl)-sn-glycero-3-phospho-1-myo-inositol)	C34H61O17P	M+H_[+1]
774.394	540.6	2	0.054	C20:0	0.346859	No annotations available.
774.516	95.8	2	0	C20:0	-0.391575	No annotations available.
775.299	457.8	2	0	C20:0	-0.326561	No annotations available.
776.078	497	2	0	C20:0	-0.314711	No annotations available.
776.299	453.3	2	0	C20:0	-0.346924	No annotations available.
779.866	475.5	2	0	C20:0	-0.341221	No annotations available.
781.366	451.5	2	0	C20:0	-0.368493	No annotations available.
785.363	522.6	2	0	C20:0	-0.317847	No annotations available.
786.925	469.9	2	0	C20:0	-0.419183	No annotations available.
789.349	517.3	2	0	C20:0	-0.397147	No annotations available.
798.623	480.1	2	0.059	C20:0	0.377823	No annotations available.
800.879	468.7	2	0	C20:0	-0.388917	No annotations available.
801.882	473.2	2	0	C20:0	-0.354525	No annotations available.
803.949	455.3	2	0	C20:0	-0.32018	No annotations available.
805.29	526.3	2	0	C20:0	-0.315995	No annotations available.
807.492	101.4	2	0	C20:0	-0.331663	No annotations available.
813.447	512.9	2	0	C20:0	-0.387613	No annotations available.
815.445	515.9	2	0	C20:0	-0.303137	No annotations available.
815.621	469.1	2	0.055	C20:0	0.350587	Expand group to view annotations.
						LMGP04020062	3	1-eicosyl-2-(8Z11Z14Z-eicosatrienoyl)-glycero-3-phospho-(1-sn-glycerol)	C46H87O9P	M+H
						LMGP04030054	3	1-(1Z-octadecenyl)-2-(13Z16Z-docosadienoyl)-glycero-3-phospho-(1-sn-glycerol)	C46H87O9P	M+H
						LMGP04030077	3	1-(1Z-eicosenyl)-2-(11Z14Z-eicosadienoyl)-glycero-3-phospho-(1-sn-glycerol)	C46H87O9P	M+H
816.51	424.3	2	0.054	C20:0	0.343828	No annotations available.
818.369	544.4	2	0	C20:0	-0.397008	No annotations available.
818.405	510.7	2	0	C20:0	-0.362599	No annotations available.
818.546	100.7	2	0	C20:0	-0.381596	No annotations available.
819.547	100.3	2	0	C20:0	-0.409465	No annotations available.
822.891	466.9	2	0	C20:0	-0.342984	No annotations available.
823.6	470.6	2	0.053	C20:0	0.34281	No annotations available.
825.887	467.2	2	0	C20:0	-0.310633	No annotations available.
826.295	40.1	2	0.048	C20:0	0.305625	No annotations available.
826.394	449.4	2	0	C20:0	-0.315658	Expand group to view annotations.
						HMDB34875	3	(2b3b)-Dihydroxy-30-nor-1220(29)-oleanadiene-28-glucopyranosyloxy-23-oic acid 3-glucuronide	C41H60O17	M+H_[+1]
						HMDB36337	3	67-Didehydrofevicordin F 3-glucosyl-(1-6)-glucoside	C41H60O17	M+H_[+1]
832.45	46.4	2	0	C20:0	-0.337256	No annotations available.
833.34	516	2	0	C20:0	-0.448708	No annotations available.
833.376	516.4	2	0	C20:0	-0.387817	No annotations available.
836.553	97.3	2	0	C20:0	-0.40474	No annotations available.
838.628	468.3	2	0.048	C20:0	0.309794	Expand group to view annotations.
						HMDB08054	3	PC(18:022:4(7Z10Z13Z16Z))	C48H88NO8P	M+H
						HMDB08152	3	PC(18:2(9Z12Z)22:2(13Z16Z))	C48H88NO8P	M+H
						HMDB08184	3	PC(18:3(6Z9Z12Z)22:1(13Z))	C48H88NO8P	M+H
						HMDB08217	3	PC(18:3(9Z12Z15Z)22:1(13Z))	C48H88NO8P	M+H
						HMDB08249	3	PC(18:4(6Z9Z12Z15Z)22:0)	C48H88NO8P	M+H
						HMDB08279	3	PC(20:020:4(5Z8Z11Z14Z))	C48H88NO8P	M+H
						HMDB08280	3	PC(20:020:4(8Z11Z14Z17Z))	C48H88NO8P	M+H
						HMDB08310	3	PC(20:1(11Z)20:3(5Z8Z11Z))	C48H88NO8P	M+H
						HMDB08311	3	PC(20:1(11Z)20:3(8Z11Z14Z))	C48H88NO8P	M+H
						HMDB08342	3	PC(20:2(11Z14Z)20:2(11Z14Z))	C48H88NO8P	M+H
						HMDB08374	3	PC(20:3(5Z8Z11Z)20:1(11Z))	C48H88NO8P	M+H
						HMDB08438	3	PC(20:4(5Z8Z11Z14Z)20:0)	C48H88NO8P	M+H
						HMDB08471	3	PC(20:4(8Z11Z14Z17Z)20:0)	C48H88NO8P	M+H
						HMDB08536	3	PC(22:018:4(6Z9Z12Z15Z))	C48H88NO8P	M+H
						HMDB08566	3	PC(22:1(13Z)18:3(6Z9Z12Z))	C48H88NO8P	M+H
						HMDB08567	3	PC(22:1(13Z)18:3(9Z12Z15Z))	C48H88NO8P	M+H
						HMDB08598	3	PC(22:2(13Z16Z)18:2(9Z12Z))	C48H88NO8P	M+H
						HMDB08628	3	PC(22:4(7Z10Z13Z16Z)18:0)	C48H88NO8P	M+H
						HMDB11201	3	PC(20:3(8Z11Z14Z)20:1(11Z))	C48H88NO8P	M+H
						LMGP01010813	3	1-octadecanoyl-2-(7Z10Z13Z16Z-docosatetraenoyl)-sn-glycero-3-phosphocholine	C48H88NO8P	M+H
						LMGP01011023	3	1-eicosanoyl-2-(5Z8Z11Z14Z-eicosatetraenoyl)-sn-glycero-3-phosphocholine	C48H88NO8P	M+H
						LMGP01011045	3	12-di-(11E14E-eicosadienoyl)-sn-glycero-3-phosphocholine	C48H88NO8P	M+H
						LMGP01011638	3	1-(9Z12Z-octadecadienoyl)-2-(13Z16Z-docosadienoyl)-glycero-3-phosphocholine	C48H88NO8P	M+H
						LMGP01011667	3	1-(6Z9Z12Z-octadecatrienoyl)-2-(11Z-docosenoyl)-glycero-3-phosphocholine	C48H88NO8P	M+H
						LMGP01011696	3	1-(9Z12Z15Z-octadecatrienoyl)-2-(11Z-docosenoyl)-glycero-3-phosphocholine	C48H88NO8P	M+H
						LMGP01011726	3	1-(6Z9Z12Z15Z-octadecatetraenoyl)-2-docosanoyl-glycero-3-phosphocholine	C48H88NO8P	M+H
						LMGP01011826	3	1-(11Z-eicosenoyl)-2-(8Z11Z14Z-eicosatrienoyl)-glycero-3-phosphocholine	C48H88NO8P	M+H
						LMGP01011856	3	12-di-(11Z14Z-eicosadienoyl)-sn-glycero-3-phosphocholine	C48H88NO8P	M+H
						LMGP01011886	3	1-(8Z11Z14Z-eicosatrienoyl)-2-(11Z-eicosenoyl)-glycero-3-phosphocholine	C48H88NO8P	M+H
						LMGP01011915	3	1-(5Z8Z11Z14Z-eicosatetraenoyl)-2-eicosanoyl-glycero-3-phosphocholine	C48H88NO8P	M+H
						LMGP01011991	3	1-docosanoyl-2-(6Z9Z12Z15Z-octadecatetraenoyl)-glycero-3-phosphocholine	C48H88NO8P	M+H
						LMGP01012018	3	1-(11Z-docosenoyl)-2-(6Z9Z12Z-octadecatrienoyl)-glycero-3-phosphocholine	C48H88NO8P	M+H
						LMGP01012019	3	1-(11Z-docosenoyl)-2-(9Z12Z15Z-octadecatrienoyl)-glycero-3-phosphocholine	C48H88NO8P	M+H
						LMGP01012048	3	1-(13Z16Z-docosadienoyl)-2-(9Z12Z-octadecadienoyl)-glycero-3-phosphocholine	C48H88NO8P	M+H
						LMGP01012077	3	1-(7Z10Z13Z16Z-docosatetraenoyl)-2-octadecanoyl-glycero-3-phosphocholine	C48H88NO8P	M+H
						LMGP01012176	3	1-(6Z9Z12Z-octadecatrienoyl)-2-(13Z-docosenoyl)-sn-glycero-3-phosphocholine	C48H88NO8P	M+H
						LMGP01012180	3	1-(9Z12Z15Z-octadecatrienoyl)-2-(13Z-docosenoyl)-sn-glycero-3-phosphocholine	C48H88NO8P	M+H
						LMGP01012186	3	1-eicosanoyl-2-(8Z11Z14Z17Z-eicosatetraenoyl)-sn-glycero-3-phosphocholine	C48H88NO8P	M+H
						LMGP01012187	3	1-(11Z-eicosenoyl)-2-(5Z8Z11Z-eicosatrienoyl)-sn-glycero-3-phosphocholine	C48H88NO8P	M+H
						LMGP01012203	3	1-(5Z8Z11Z-eicosatrienoyl)-2-(11Z-eicosenoyl)-sn-glycero-3-phosphocholine	C48H88NO8P	M+H
						LMGP01012213	3	1-(8Z11Z14Z17Z-eicosatetraenoyl)-2-eicosanoyl-sn-glycero-3-phosphocholine	C48H88NO8P	M+H
						LMGP01012223	3	1-(13Z-docosenoyl)-2-(6Z9Z12Z-octadecatrienoyl)-sn-glycero-3-phosphocholine	C48H88NO8P	M+H
						LMGP01012224	3	1-(13Z-docosenoyl)-2-(9Z12Z15Z-octadecatrienoyl)-sn-glycero-3-phosphocholine	C48H88NO8P	M+H
						LMGP02011015	3	1-heneicosanoyl-2-(7Z10Z13Z16Z-docosatetraenoyl)-glycero-3-phosphoethanolamine	C48H88NO8P	M+H
						LMGP02011127	3	1-(7Z10Z13Z16Z-docosatetraenoyl)-2-heneicosanoyl-glycero-3-phosphoethanolamine	C48H88NO8P	M+H
842.796	480.6	2	0	C20:0	-0.32103	No annotations available.
847.405	447.3	2	0	C20:0	-0.331234	No annotations available.
849.314	516.5	2	0	C20:0	-0.398848	No annotations available.
857.472	511.5	2	0	C20:0	-0.38591	No annotations available.
864.353	450	2	0	C20:0	-0.381751	No annotations available.
865.521	542.3	2	0.048	C20:0	0.306118	No annotations available.
866.918	461.2	2	0	C20:0	-0.358221	No annotations available.
871.561	80.7	2	0	C20:0	-0.346538	Expand group to view annotations.
						LMGP06020086	3	1-octadecyl-2-(5Z8Z11Z14Z17Z-eicosapentaenoyl)-glycero-3-phospho-(1-myo-inositol)	C47H83O12P	M+H
						LMGP06030028	3	1-(1Z-hexadecenyl)-2-(7Z10Z13Z16Z-docosatetraenoyl)-glycero-3-phospho-(1-myo-inositol)	C47H83O12P	M+H
						LMGP06030073	3	1-(1Z-eicosenyl)-2-(6Z9Z12Z15Z-octadecatetraenoyl)-glycero-3-phospho-(1-myo-inositol)	C47H83O12P	M+H
						LMGP06030091	3	1-(1Z-octadecenyl)-2-(5Z8Z11Z14Z-eicosatetraenoyl)-glycero-3-phospho-(1-myo-inositol)	C47H83O12P	M+H
876.55	574.7	2	0.056	C20:0	0.357153	No annotations available.
879.396	518.2	2	0	C20:0	-0.300298	Expand group to view annotations.
						HMDB30010	3	Glucoconvallatoxoloside	C41H64O20	M+H_[+2]
890.477	443.2	2	0	C20:0	-0.305178	No annotations available.
890.537	583.4	2	0.058	C20:0	0.373386	No annotations available.
893.34	514	2	0	C20:0	-0.319837	No annotations available.
894.345	516.2	2	0	C20:0	-0.38438	No annotations available.
897.577	104.2	2	0	C20:0	-0.329461	Expand group to view annotations.
						LMGP06020084	3	1-octadecyl-2-(4Z7Z10Z13Z16Z19Z-docosahexaenoyl)-glycero-3-phospho-(1-myo-inositol)	C49H85O12P	M+H
						LMGP06030081	3	1-(1Z-eicosenyl)-2-(5Z8Z11Z14Z17Z-eicosapentaenoyl)-glycero-3-phospho-(1-myo-inositol)	C49H85O12P	M+H
898.533	442.3	2	0	C20:0	-0.326228	No annotations available.
904.655	590.1	2	0.068	C20:0	0.434987	No annotations available.
917.818	552.8	2	0	C20:0	-0.306393	No annotations available.
928.154	535.9	2	0	C20:0	-0.307824	No annotations available.
933.498	101.3	2	0	C20:0	-0.30103	Expand group to view annotations.
						LMST01080079	3	3-O-(Glcb1-2Glcb1-4Galb)-(25R)-12-oxo-5alpha-spirostan-3beta-ol	C46H76O19	M+H
935.954	463.9	2	0	C20:0	-0.320525	No annotations available.
940.602	108.3	2	0	C20:0	-0.438838	No annotations available.
943.437	510.5	2	0	C20:0	-0.373807	No annotations available.
946.434	595.2	2	0	C20:0	-0.305271	No annotations available.
946.522	507.1	2	0	C20:0	-0.319365	No annotations available.
957.168	522	2	0	C20:0	-0.337114	No annotations available.
981.483	440.8	2	0	C20:0	-0.328873	No annotations available.
984.394	514.5	2	0	C20:0	-0.365228	No annotations available.
992.455	593	2	0	C20:0	-0.413061	No annotations available.
996.448	591.2	2	0	C20:0	-0.322554	No annotations available.
997.423	442.8	2	0	C20:0	-0.471557	No annotations available.
998.43	446.8	2	0	C20:0	-0.305914	No annotations available.
1001.63	105.8	2	0	C20:0	-0.341784	Expand group to view annotations.
						LMGP15010006	3	2-O-(alpha-D-Manp)-(1-hexadecanoyl-2-octadecanoyl-sn-glycero-3-phospho-1-myo-inositol)	C49H93O18P	M+H
						LMGP15010015	3	2-O-(alpha-D-Manp)-(1-octadecanoyl-2-hexadecanoyl-sn-glycero-3-phospho-1-myo-inositol)	C49H93O18P	M+H
1009.88	515.6	2	0	C20:0	-0.33803	No annotations available.
1029.29	37.3	2	0.048	C20:0	0.310945	No annotations available.
1034.09	46.8	2	0.048	C20:0	0.31109	No annotations available.
1055.41	593.7	2	0	C20:0	-0.351594	Expand group to view annotations.
						HMDB31788	3	Hexakis(2-methyl-2-phenylpropyl)distannoxane	C60H78OSn2	M+H
1057.29	498.8	2	0.05	C20:0	0.318418	No annotations available.
1060.61	513.1	2	0	C20:0	-0.337494	Expand group to view annotations.
						HMDB06984	3	CDP-DG(18:022:3(10Z13Z16Z))	C52H91N3O15P2	M+H
						LMGP13010019	3	((2R3R5R)-5-(4-amino-2-oxo-12-dihydropyrimidin-1-yl)-34-dihydroxyoxolan-2-ylmethoxy(hydroxy)phosphoryl)oxy(2R)-2-(10Z13Z16Z)-docosa-101316-trienoyloxy-3-(octadecanoyloxy)propoxyphosphinic acid	C52H91N3O15P2	M+H
1062.67	409.4	2	0.051	C20:0	0.328809	No annotations available.
1071.45	506.3	2	0	C20:0	-0.381515	No annotations available.
1085.11	442.2	2	0	C20:0	-0.333147	No annotations available.
1086.5	587.3	2	0	C20:0	-0.374839	Expand group to view annotations.
						HMDB36479	3	Cyclolinopeptide F	C55H73N9O10S2	M+H_[+2]
1090.04	506.9	2	0	C20:0	-0.368698	No annotations available.
1096.55	585.7	2	0	C20:0	-0.345586	No annotations available.
1100.44	593.2	2	0	C20:0	-0.322412	No annotations available.
1101.14	429.3	2	0.05	C20:0	0.324407	No annotations available.
1121.59	426.8	2	0.047	C20:0	0.301234	No annotations available.
1121.77	480.1	2	0.048	C20:0	0.307135	Expand group to view annotations.
						HMDB04892	3	Ganglioside GA2 (d18:120:0)	C58H108N2O18	M+H
						LMSP0503AA03	3	GalNAcbeta1-4Galbeta1-4Glcbeta-Cer(d18:120:0)	C58H108N2O18	M+H
						LMSP0504AA03	3	GlcNAcbeta1-3Galbeta1-4Glcbeta-Cer(d18:120:0)	C58H108N2O18	M+H
						LMSP0508AA03	3	GlcNAcbeta1-4Manbeta1-4Glcbeta-Cer(d18:120:0)	C58H108N2O18	M+H
1128.05	580.4	2	0	C20:0	-0.309684	No annotations available.
1143.46	587.1	2	0	C20:0	-0.37143	No annotations available.
1184.49	34.4	2	0.048	C20:0	0.31115	No annotations available.
1193.79	482.7	2	0.05	C20:0	0.321608	No annotations available.
1210.68	493.3	2	0	C20:0	-0.361001	No annotations available.
1249.72	34	2	0.056	C20:0	0.36246	No annotations available.
1285.73	36.4	2	0.052	C20:0	0.332963	No annotations available.
1404.19	33.3	2	0	C20:0	-0.433338	No annotations available.
1411.92	414.3	2	0	C20:0	-0.352484	No annotations available.
1415.78	483.4	2	0	C20:0	-0.300936	No annotations available.
1426.32	35.2	2	0.051	C20:0	0.327868	No annotations available.
1438.19	32.6	2	0.047	C20:0	0.303968	No annotations available.
1444.12	275.6	2	0.052	C20:0	0.336868	No annotations available.
1459.81	480.8	2	0	C20:0	-0.300862	No annotations available.
1552.98	274.2	2	0	C20:0	-0.310472	No annotations available.
1565.55	411.6	2	0.047	C20:0	0.302213	No annotations available.
1583.8	544.9	2	0	C20:0	-0.358439	No annotations available.
1596.67	34.3	2	0.061	C20:0	0.390385	No annotations available.
1634.05	483.8	2	0.065	C20:0	0.419195	No annotations available.
1670.85	546.8	2	0	C20:0	-0.340361	No annotations available.
157.987	256.4	2	0.05	C20:0	0.32413	No annotations available.
193.086	95.6	2	0.049	C20:0	0.313997	Expand group to view annotations.
						HMDB30580	3	(R)-Shinanolone	C11H12O3	M+H
						HMDB30752	3	Methyl trans-p-methoxycinnamate	C11H12O3	M+H
						HMDB31610	3	Allyl phenoxyacetate	C11H12O3	M+H
						HMDB31623	3	Ethyl phenylglycidate	C11H12O3	M+H
						HMDB32591	3	Dehydrozingerone	C11H12O3	M+H
						HMDB35275	3	Isomyristicin	C11H12O3	M+H
						HMDB35873	3	Myristicin	C11H12O3	M+H
						HMDB35894	3	(Z)-4-Methoxy-6-(1-propenyl)-13-benzodioxole	C11H12O3	M+H
						HMDB37277	3	Isoeugenol formate	C11H12O3	M+H
						HMDB37877	3	Eugenyl formate	C11H12O3	M+H
						HMDB40268	3	Ethyl 3-oxo-3-phenylpropanoate	C11H12O3	M+H
						HMDB40446	3	Benzyl acetoacetate	C11H12O3	M+H
						HMDB41007	3	1-Hydroxychavicol acetate	C11H12O3	M+H
						HMDB41481	3	4-(34-Methylenedioxyphenyl)-2-butanone	C11H12O3	M+H
269.126	56	2	0.06	C20:0	0.385097	Expand group to view annotations.
						HMDB61115	3	Lenticin	C14H18N2O2	M+Na
						HMDB12881	3	Acetylcarnosine	C11H16N4O4	M+H
						HMDB14524	3	Dexrazoxane	C11H16N4O4	M+H
						HMDB14692	3	Pentostatin	C11H16N4O4	M+H
						HMDB28865	3	Hydroxyprolyl-Histidine	C11H16N4O4	M+H
						HMDB28886	3	Histidinyl-Hydroxyproline	C11H16N4O4	M+H
283.163	55.2	2	0.049	C20:0	0.31709	No annotations available.
356.938	75.1	2	0.049	C20:0	0.315676	No annotations available.
363.253	574.2	2	0.06	C20:0	0.384237	Expand group to view annotations.
						HMDB10214	3	1920-DiHDPA	C22H34O4	M+H
						HMDB31137	3	Annosquamosin A	C22H34O4	M+H
						HMDB33398	3	Annoglabasin B	C22H34O4	M+H
						HMDB33677	3	Lycopersiconolide	C22H34O4	M+H
						HMDB36315	3	Dimethyl ent-16alpha-kaurane-1719-dioate	C22H34O4	M+H
						HMDB36704	3	Epoxysiderol	C22H34O4	M+H
						HMDB39226	3	(Z)-24-Dihydroxy-6-(8-pentadecenyl)benzoic acid	C22H34O4	M+H
						HMDB41495	3	ent-16a-Hydroxy-17-acetoxy-19-kauranal	C22H34O4	M+H
						LMFA03010086	3	9oxo-15R-hydroxy-1616-dimethyl-5Z10Z13E-prostatrienoic acid	C22H34O4	M+H
						LMFA03010158	3	1a1b-dihomo-11-oxo-15S-hydroxy-5Z913E-prostatrienoic acid	C22H34O4	M+H
						LMFA03010159	3	1a1b-dihomo-9S-hydroxy-11-oxo-5Z12E14E-prostatrienoic acid	C22H34O4	M+H
						LMFA04000039	3	(-)-78-dihydroxy-4Z10Z13Z16Z19Z-docosapentaenoic acid	C22H34O4	M+H
						LMFA04000040	3	(-)-1011-dihydroxy-4Z7Z13Z16Z19Z-docosapentaenoic acid	C22H34O4	M+H
						LMFA04000041	3	(-)-1314-dihydroxy-4Z7Z10Z16Z19Z-docosapentaenoic acid	C22H34O4	M+H
						LMFA04000042	3	(-)-1617-dihydroxy-4Z7Z10Z13Z19Z-docosapentaenoic acid	C22H34O4	M+H
						LMFA04000043	3	(-)-1920-dihydroxy-4Z7Z10Z13Z16Z-docosapentaenoic acid	C22H34O4	M+H
368.181	65	2	0	C20:0	-0.391213	No annotations available.
431.262	59.6	2	0.05	C20:0	0.320407	No annotations available.
584.314	42.2	2	0.047	C20:0	0.303665	No annotations available.
787.459	55.6	2	0	C20:0	-0.309107	No annotations available.
109.101	462.7	3	0.003	C10:2	0.314155	No annotations available.
				C10:3	0.39466
131.929	563.4	3	0.002	C10:2	0.312532	No annotations available.
145.169	256.7	3	0	C10:3	-0.316192	No annotations available.
170.08	146.3	3	0	C10:3	-0.322626	Expand group to view annotations.
						HMDB00216	3	Norepinephrine	C8H11NO3	M+H
						HMDB00239	3	Pyridoxine	C8H11NO3	M+H
						HMDB01537	3	6-Hydroxydopamine	C8H11NO3	M+H
						HMDB04817	3	5-Hydroxydopamine	C8H11NO3	M+H
						HMDB35178	3	6-Acetyl-23-dihydro-2-(hydroxymethyl)-4(1H)-pyridinone	C8H11NO3	M+H
						HMDB37685	3	xi-Norepinephrine	C8H11NO3	M+H
213.121	57.7	3	0.001	C10:3	0.312297	Expand group to view annotations.
						HMDB15398	3	Varenicline	C13H13N3	M+H_[+1]
						HMDB29746	3	3-Amino-14-dimethyl-5H-pyrido43-bindole	C13H13N3	M+H_[+1]
215.179	506.2	3	0.001	C10:3	0.311819	No annotations available.
218.91	13.8	3	0.001	C10:3	0.316947	No annotations available.
239.09	63.8	3	0.066	C20:1	0.336072	Expand group to view annotations.
				C20:0	0.318735
				C10:2	0.328386
239.09	63.8	3	0.066	C20:1	0.336072	HMDB02511	3	345-Trimethoxycinnamic acid	C12H14O5	M+H
239.09	63.8	3	0.066	C20:1	0.336072	HMDB11721	3	Trans-2 3 4-Trimethoxycinnamate	C12H14O5	M+H
239.09	63.8	3	0.066	C20:1	0.336072	HMDB31771	3	1-(245-Trimethoxyphenyl)-12-propanedione	C12H14O5	M+H
245.149	56.7	3	0.001	C10:3	0.300584	Expand group to view annotations.
245.149	56.7	3	0.001	C10:3	0.300584	HMDB28866	3	Hydroxyprolyl-Isoleucine	C11H20N2O4	M+H
245.149	56.7	3	0.001	C10:3	0.300584	HMDB28867	3	Hydroxyprolyl-Leucine	C11H20N2O4	M+H
245.149	56.7	3	0.001	C10:3	0.300584	HMDB28908	3	Isoleucyl-Hydroxyproline	C11H20N2O4	M+H
245.149	56.7	3	0.001	C10:3	0.300584	HMDB28930	3	Leucyl-Hydroxyproline	C11H20N2O4	M+H
245.615	342.5	3	0	C10:2	-0.384308	No annotations available.
256.145	61.7	3	0.003	C10:2	0.342046	Expand group to view annotations.
				C10:3	0.346155
						HMDB32216	3	Diethylenetriamine crosslinked with epichlorohydrin	C14H22ClNO	M+H
261.108	536.1	3	0	C10:2	-0.30852	Expand group to view annotations.
				C10:3	-0.338138
						HMDB11161	3	L-alpha-glutamyl-L-hydroxyproline	C10H16N2O6	M+H
						HMDB29403	3	Oxypinnatanine	C10H16N2O6	M+H
263.088	246.2	3	0.079	C20:0	0.38615	Expand group to view annotations.
				C10:2	0.376653
				C20:1	0.372141
						HMDB11164	3	L-beta-aspartyl-L-glutamic acid	C9H14N2O7	M+H
						HMDB30413	3	Na-L-Glutamyl-L-aspartic acid	C9H14N2O7	M+H
						HMDB30419	3	Ng-L-Glutamyl-L-aspartic acid	C9H14N2O7	M+H
268.642	428.1	3	0.002	C10:2	0.303656	No annotations available.
272.166	82.1	3	0.004	C10:3	0.397529	Expand group to view annotations.
				C10:2	0.348827
272.166	82.1	3	0.004	C10:3	0.397529	HMDB60766	3	4-Hydroxyatomoxetine	C17H21NO2	M+H
273.211	539.2	3	0.017	C10:2	0.366764	No annotations available.
				C20:1	0.331726
277.12	383	3	0	C10:2	-0.322051	No annotations available.
281.115	136.4	3	0.001	C10:3	0.320337	Expand group to view annotations.
						HMDB00706	3	L-Aspartyl-L-phenylalanine	C13H16N2O5	M+H
						HMDB11167	3	L-beta-aspartyl-L-phenylalanine	C13H16N2O5	M+H
						HMDB15058	3	Levosimendan	C14H12N6O	M+H
						HMDB15081	3	Phenprocoumon	C18H16O3	M+H
						HMDB28760	3	Aspartyl-Phenylalanine	C13H16N2O5	M+H
						HMDB28991	3	Phenylalanyl-Aspartate	C13H16N2O5	M+H
						HMDB32987	3	Ipriflavone	C18H16O3	M+H
						HMDB41304	3	Asparenyol	C18H16O3	M+H
						LMFA01030723	3	6-hydroxy-7E9E-Octadecadiene-11131517-tetraynoic acid	C18H16O3	M+H
						LMFA01030724	3	6-hydroxy-7E9Z-Octadecadiene-11131517-tetraynoic acid	C18H16O3	M+H
						LMFA01030725	3	6-hydroxy-7Z9E-Octadecadiene-11131517-tetraynoic acid	C18H16O3	M+H
284.91	556	3	0	C10:2	-0.342857	Expand group to view annotations.
						LMFA01090082	3	2-(dibromomethylene)hexanoic acid	C7H10Br2O2	M+H
286.101	338.1	3	0.002	C10:2	0.312841	Expand group to view annotations.
						HMDB05923	3	N4-Acetylcytidine	C11H15N3O6	M+H
286.293	145.3	3	0.001	C10:3	0.356896	No annotations available.
293.146	70.1	3	0.004	C10:2	0.347488	No annotations available.
				C10:3	0.436917
294.559	54.8	3	0	C10:3	-0.306359	No annotations available.
320.902	24.1	3	0.001	C10:3	0.375602	No annotations available.
326.213	266.8	3	0.065	C20:1	0.325565	Expand group to view annotations.
					0.356451
					0.31514
						HMDB11627	3	Farnesylcysteine	C18H31NO2S	M+H
						HMDB41962	3	Norpropoxyphene	C21H27NO2	M+H
						HMDB61138	3	dinor-Levomethadyl acetate	C21H27NO2	M+H
330.844	16.9	3	0.001	C10:3	0.330919	No annotations available.
331.134	447.9	3	0.001	C10:3	0.32532	No annotations available.
336.154	473.4	3	0.012	C20:2	0.360216	No annotations available.
				C10:3	0.382308
				C10:2	0.329074
336.215	87.9	3	0.003	C10:3	0.448304	No annotations available.
				C10:2	0.315247
346.861	43	3	0.001	C10:3	0.303428	No annotations available.
367.062	134.3	3	0.001	C10:3	0.328312	Expand group to view annotations.
						HMDB01439	3	Phosphoribosyl formamidocarboxamide	C10H15N4O9P	M+H
						HMDB03201	3	Malvidin	C17H15ClO7	M+H
369.872	52.6	3	0.005	C18OH	0.319516	No annotations available.
				C10:2	0.339253
369.994	50.9	3	0.001	C10:3	0.302054	No annotations available.
371.314	386.1	3	0.001	C10:3	0.385832	Expand group to view annotations.
				C10:3	0.385832	HMDB40270	3	Diethylhexyl adipate	C22H42O4	M+H
				C10:3	0.385832	HMDB41619	3	Dioctyl hexanedioate	C22H42O4	M+H
				C10:3	0.385832	LMFA01170037	3	Docosanedioic acid	C22H42O4	M+H
				C10:3	0.385832	LMFA07010840	3	16-dioctyl hexanedioate	C22H42O4	M+H
375.226	337.1	3	0.001	C10:3	0.328012	No annotations available.
377.176	52.6	3	0	C10:2	-0.320195	Expand group to view annotations.
				C10:2	-0.320195	HMDB29788	3	Kanzonol V	C24H24O4	M+H
382.257	143.2	3	0.092	C10:2	0.437279	No annotations available.
				C20:0	0.377792
				C10:3	0.348316
				C18OH	0.314036
				C20:2	0.34374
				C20:1	0.435325
383.329	507.3	3	0.002	C10:2	0.331237	Expand group to view annotations.
						HMDB01093	3	5a-Cholesta-824-dien-3-one	C27H42O	M+H
						HMDB02394	3	Cholesta-46-dien-3-one	C27H42O	M+H
						HMDB03896	3	7-Dehydrodesmosterol	C27H42O	M+H
						LMST01010058	3	cholesta-35-dien-7-one	C27H42O	M+H
						LMST01010059	3	cholesta-46-dien-3-one	C27H42O	M+H
						LMST01010121	3	cholest-5724-trien-3beta-ol	C27H42O	M+H
						LMST01010168	3	5alpha-cholesta-824-dien-3-one	C27H42O	M+H
						LMST01010254	3	cholesta-468(14)-trien-3beta-ol	C27H42O	M+H
						LMST01010289	3	cholest-5-en-23-yn-3beta-ol	C27H42O	M+H
						LMST01010353	3	Cholesta-14-dien-3-one	C27H42O	M+H
						LMST01110014	3	(25S)-24S26-cyclo-cholest-5-en-3beta-ol	C27H42O	M+H
						LMST03020147	3	(5Z7E)-(3S)-910-seco-5710(19)24-cholestatetraen-3-ol	C27H42O	M+H
						LMST03020664	3	(5Z7E)-(3S)-910-seco-5710(19)25-cholestatetraen-3-ol	C27H42O	M+H
						LMST03020665	3	(4E6Z8Z)-(1R)-4-methyl-910-seco-4(5)6824-cholestatetraen-1-ol	C27H42O	M+H
385.247	337.9	3	0.003	C10:2	0.348453	Expand group to view annotations.
				C10:3	0.326684
						HMDB30407	3	Merodesmosine	C18H34N4O6	M+H-H2O
						HMDB33523	3	(-)-Pyrifolidine	C23H32N2O3	M+H
413.776	425.8	3	0	C10:3	-0.30389	No annotations available.
417.309	298.8	3	0	C18OH	-0.307484	No annotations available.
				C20:1	-0.335259
				C10:2	-0.328072
418.293	302.8	3	0.002	C10:2	0.312464	No annotations available.
431.751	18.8	3	0.004	C10:2	0.377245	No annotations available.
				C10:3	0.395258
441.338	308	3	0.091	C20:0	0.343833	Expand group to view annotations.
				C20:1	0.541942
				C10:3	0.328733
				C20:2	0.444245
				C10:2	0.497538
						HMDB12560	3	13-Hydroxy-alpha-tocotrienol	C29H44O3	M+H
						HMDB35730	3	Camelledionol	C29H44O3	M+H
						LMPR0106250001	3	-	C29H44O3	M+H
						LMST01040174	3	5alpha8alpha-epidioxy-stigmasta-69(11)22E-trien-3beta-ol	C29H44O3	M+H
						LMST01060012	3	11alpha-hydroxy-5beta6beta-epoxy-23-demethylgorgost-2-en-1-one	C29H44O3	M+H
						LMST01060016	3	6beta11alpha-dihydroxy-23-demethyl-gorgosta-24-dien-1-one	C29H44O3	M+H
						LMST03020394	3	(5Z7E)-(1S3R11S)-11-ethynyl-910-seco-5710(19)-cholestatriene-1325-triol	C29H44O3	M+H
						LMST03020395	3	(5Z7E22E24E)-(1S3R)-24a24b-dihomo-910-seco-5710(19)2224-cholestapentaene-1325-triol	C29H44O3	M+H
						LMST03020396	3	(5Z7E)-(1S3R)-2627-dimethyl-910-seco-5710(19)-cholestatrien-22-yne-1325-triol	C29H44O3	M+H
						LMST03020397	3	(5Z7E)-(1S3R20R)-2627-dimethyl-910-seco-5710(19)-cholestatrien-22-yne-1325-triol	C29H44O3	M+H
						LMST03020583	3	(5Z7E)-(1S3R20S)-20-cyclopropyl-21-nor-910-seco-5710(19)16-cholestatetraene-1325-triol	C29H44O3	M+H
						LMST03020623	3	(5Z7E24aE)-(1S3R)-24a24b-dihomo-910-seco-5710(19)24a-cholestatrien-1325-triol	C29H44O3	M+H
451.152	483.4	3	0.002	C10:2	0.300306	Expand group to view annotations.
						HMDB35067	3	Melleolide L	C23H27ClO7	M+H
458.953	88	3	0.001	C10:3	0.315882	No annotations available.
465.298	526.4	3	0.002	C10:2	0.305048	Expand group to view annotations.
						LMGP10050026	3	1-(11Z-eicosenoyl)-glycero-3-phosphate	C23H45O7P	M+H
473.288	65.7	3	0.001	C10:3	0.312668	Expand group to view annotations.
						HMDB33899	3	Ixocarpanolide	C28H40O6	M+H
						HMDB37379	3	Vamonolide	C28H40O6	M+H
						HMDB38704	3	Macrocarpal B	C28H40O6	M+H
						HMDB38733	3	Macrocarpal D	C28H40O6	M+H
						HMDB38734	3	Macrocarpal E	C28H40O6	M+H
						HMDB41586	3	Macrocarpal H	C28H40O6	M+H
479.186	253.5	3	0	C10:3	-0.325433	No annotations available.
482.264	338.7	3	0.001	C10:3	0.303868	No annotations available.
491.207	106.5	3	0.001	C10:3	0.313695	Expand group to view annotations.
						LMPK12120474	3	-	C29H30O7	M+H
						LMPK12140213	3	-	C29H30O7	M+H
539.428	528.1	3	0.001	C10:3	0.340527	No annotations available.
553.433	547.1	3	0	C10:3	-0.34928	No annotations available.
583.346	435.8	3	0	C20:1	-0.302721	No annotations available.
				C20:2	-0.350941
				C10:3	-0.362195
596.433	582	3	0.001	C10:3	0.301041	No annotations available.
614.31	585.2	3	0.001	C10:3	0.382425	No annotations available.
618.476	569.9	3	0.004	C10:2	0.409522	No annotations available.
				C10:3	0.360361
622.67	42.5	3	0.002	C10:2	0.345362	No annotations available.
625.276	380.8	3	0.002	C10:2	0.30067	Expand group to view annotations.
						HMDB36105	3	Kanokoside D	C27H44O16	M+H
628.614	320.1	3	0.002	C10:2	0.316923	No annotations available.
631.43	579.6	3	0.001	C10:3	0.333843	Expand group to view annotations.
						HMDB33408	3	4-Methoxycinnamoyloleanolic acid methyl ester	C41H58O5	M+H
						LMGP10010076	3	1-tridecanoyl-2-(9Z12Z-octadecadienoyl)-glycero-3-phosphate	C34H63O8P	M+H
						LMGP10010096	3	1-tetradecanoyl-2-(9Z12Z-heptadecadienoyl)-glycero-3-phosphate	C34H63O8P	M+H
						LMGP10010115	3	1-(9Z-tetradecenoyl)-2-(9Z-heptadecenoyl)-glycero-3-phosphate	C34H63O8P	M+H
						LMGP10010166	3	1-(9Z-pentadecenoyl)-2-(9Z-hexadecenoyl)-glycero-3-phosphate	C34H63O8P	M+H
						LMGP10010204	3	1-(9Z-hexadecenoyl)-2-(9Z-pentadecenoyl)-glycero-3-phosphate	C34H63O8P	M+H
						LMGP10010249	3	1-(9Z-heptadecenoyl)-2-(9Z-tetradecenoyl)-glycero-3-phosphate	C34H63O8P	M+H
						LMGP10010278	3	1-(9Z12Z-heptadecadienoyl)-2-tetradecanoyl-glycero-3-phosphate	C34H63O8P	M+H
						LMGP10010339	3	1-(9Z12Z-octadecadienoyl)-2-tridecanoyl-glycero-3-phosphate	C34H63O8P	M+H
647.394	569.7	3	0.001	C10:3	0.372538	No annotations available.
648.397	579.3	3	0.001	C10:3	0.305037	No annotations available.
668.582	561.8	3	0.001	C10:3	0.347604	No annotations available.
672.549	44.4	3	0.001	C10:3	0.304792	No annotations available.
685.262	433.8	3	0.003	C10:2	0.401473	No annotations available.
707.397	306.7	3	0.002	C10:2	0.306791	Expand group to view annotations.
						HMDB41029	3	Hovenidulcioside A2	C38H58O12	M+H
728.161	533	3	0	C10:3	-0.335606	No annotations available.
728.87	480.9	3	0	C10:3	-0.306878	No annotations available.
773.727	527.9	3	0.002	C10:2	0.36221	No annotations available.
777.014	46.3	3	0	C10:3	-0.355426	No annotations available.
				C10:2	-0.333714
780.434	45.7	3	0.001	C10:3	0.342903	No annotations available.
790.385	539.8	3	0.001	C10:3	0.323256	No annotations available.
794.909	470	3	0.001	C10:3	0.312976	No annotations available.
820.075	515.2	3	0.001	C10:3	0.330918	No annotations available.
821.599	417.8	3	0.003	C10:2	0.303536	No annotations available.
				C10:3	0.305778
822.596	440.8	3	0.076	C20:0	0.368618	Expand group to view annotations.
				C20:1	0.383158
				C10:2	0.355587
						HMDB09212	3	PE(18:4(6Z9Z12Z15Z)24:1(15Z))	C47H84NO8P	M+H
						HMDB09241	3	PE(20:022:5(4Z7Z10Z13Z16Z))	C47H84NO8P	M+H
						HMDB09242	3	PE(20:022:5(7Z10Z13Z16Z19Z))	C47H84NO8P	M+H
						HMDB09273	3	PE(20:1(11Z)22:4(7Z10Z13Z16Z))	C47H84NO8P	M+H
						HMDB09338	3	PE(20:3(5Z8Z11Z)22:2(13Z16Z))	C47H84NO8P	M+H
						HMDB09371	3	PE(20:3(8Z11Z14Z)22:2(13Z16Z))	C47H84NO8P	M+H
						HMDB09403	3	PE(20:4(5Z8Z11Z14Z)22:1(13Z))	C47H84NO8P	M+H
						HMDB09436	3	PE(20:4(8Z11Z14Z17Z)22:1(13Z))	C47H84NO8P	M+H
						HMDB09468	3	PE(20:5(5Z8Z11Z14Z17Z)22:0)	C47H84NO8P	M+H
						HMDB09500	3	PE(22:020:5(5Z8Z11Z14Z17Z))	C47H84NO8P	M+H
						HMDB09531	3	PE(22:1(13Z)20:4(5Z8Z11Z14Z))	C47H84NO8P	M+H
						HMDB09532	3	PE(22:1(13Z)20:4(8Z11Z14Z17Z))	C47H84NO8P	M+H
						HMDB09562	3	PE(22:2(13Z16Z)20:3(5Z8Z11Z))	C47H84NO8P	M+H
						HMDB09563	3	PE(22:2(13Z16Z)20:3(8Z11Z14Z))	C47H84NO8P	M+H
						HMDB09593	3	PE(22:4(7Z10Z13Z16Z)20:1(11Z))	C47H84NO8P	M+H
						HMDB09625	3	PE(22:5(4Z7Z10Z13Z16Z)20:0)	C47H84NO8P	M+H
						HMDB09658	3	PE(22:5(7Z10Z13Z16Z19Z)20:0)	C47H84NO8P	M+H
						HMDB09756	3	PE(24:1(15Z)18:4(6Z9Z12Z15Z))	C47H84NO8P	M+H
						LMGP01010656	3	1-hexadecanoyl-2-(8E11E14E17E20E-tricosapentaenoyl)-sn-glycero-3-phosphocholine	C47H84NO8P	M+H
						LMGP01010719	3	1-heptadecanoyl-2-(7Z10Z13Z16Z19Z-docosapentaenoyl)-sn-glycero-3-phosphocholine	C47H84NO8P	M+H
						LMGP01011549	3	1-(9Z-heptadecenoyl)-2-(7Z10Z13Z16Z-docosatetraenoyl)-glycero-3-phosphocholine	C47H84NO8P	M+H
						LMGP01011749	3	1-nonadecanoyl-2-(5Z8Z11Z14Z17Z-eicosapentaenoyl)-glycero-3-phosphocholine	C47H84NO8P	M+H
						LMGP01011779	3	1-(9Z-nonadecenoyl)-2-(5Z8Z11Z14Z-eicosatetraenoyl)-glycero-3-phosphocholine	C47H84NO8P	M+H
						LMGP01011914	3	1-(5Z8Z11Z14Z-eicosatetraenoyl)-2-(9Z-nonadecenoyl)-glycero-3-phosphocholine	C47H84NO8P	M+H
						LMGP01011942	3	1-(5Z8Z11Z14Z17Z-eicosapentaenoyl)-2-nonadecanoyl-glycero-3-phosphocholine	C47H84NO8P	M+H
						LMGP01012075	3	1-(7Z10Z13Z16Z-docosatetraenoyl)-2-(9Z-heptadecenoyl)-glycero-3-phosphocholine	C47H84NO8P	M+H
						LMGP02010869	3	1-(11Z-eicosenoyl)-2-(7Z10Z13Z16Z-docosatetraenoyl)-glycero-3-phosphoethanolamine	C47H84NO8P	M+H
						LMGP02010930	3	1-(8Z11Z14Z-eicosatrienoyl)-2-(13Z16Z-docosadienoyl)-glycero-3-phosphoethanolamine	C47H84NO8P	M+H
						LMGP02010958	3	1-(5Z8Z11Z14Z-eicosatetraenoyl)-2-(11Z-docosenoyl)-glycero-3-phosphoethanolamine	C47H84NO8P	M+H
						LMGP02010987	3	1-(5Z8Z11Z14Z17Z-eicosapentaenoyl)-2-docosanoyl-glycero-3-phosphoethanolamine	C47H84NO8P	M+H
						LMGP02011034	3	1-docosanoyl-2-(5Z8Z11Z14Z17Z-eicosapentaenoyl)-glycero-3-phosphoethanolamine	C47H84NO8P	M+H
						LMGP02011063	3	1-(11Z-docosenoyl)-2-(5Z8Z11Z14Z-eicosatetraenoyl)-glycero-3-phosphoethanolamine	C47H84NO8P	M+H
						LMGP02011093	3	1-(13Z16Z-docosadienoyl)-2-(8Z11Z14Z-eicosatrienoyl)-glycero-3-phosphoethanolamine	C47H84NO8P	M+H
						LMGP02011122	3	1-(7Z10Z13Z16Z-docosatetraenoyl)-2-(11Z-eicosenoyl)-glycero-3-phosphoethanolamine	C47H84NO8P	M+H
867.42	461.5	3	0.002	C10:2	0.303161	No annotations available.
891.452	536.8	3	0.004	C10:3	0.412848	No annotations available.
				C10:2	0.459526
921.449	530.6	3	0.005	C10:2	0.313481	No annotations available.
				C18OH	0.330506
950.949	531.3	3	0.002	C10:2	0.357219	No annotations available.
965.378	280.8	3	0	C10:2	-0.300563	No annotations available.
				C10:3	-0.327614
969.545	444.1	3	0	C10:2	-0.30531	Expand group to view annotations.
						HMDB09989	3	PIP(18:2(9Z12Z)20:1(11Z))	C47H86O16P2	M+H
						HMDB10001	3	PIP(20:1(11Z)18:2(9Z12Z))	C47H86O16P2	M+H
970.835	514.4	3	0	C10:2	-0.317153	No annotations available.
994.626	358.4	3	0.003	C10:3	0.323534	No annotations available.
				C10:2	0.307384
1042.72	39.2	3	0.001	C10:3	0.33916	No annotations available.
1044.04	502.7	3	0.002	C10:2	0.32042	Expand group to view annotations.
						HMDB47364	3	TG(24:024:1(15Z)o-18:0)	C69H134O5	M+H
						HMDB47709	3	TG(24:0o-18:024:1(15Z))	C69H134O5	M+H
						HMDB52028	3	TG(24:1(15Z)24:0o-18:0)	C69H134O5	M+H
1050.61	41.5	3	0.001	C10:3	0.331847	No annotations available.
1072.05	44.1	3	0	C10:3	-0.315588	No annotations available.
1079.37	287.8	3	0	C10:3	-0.300964	No annotations available.
1080.41	297.1	3	0	C10:3	-0.335747	No annotations available.
1087.19	294.9	3	0	C10:3	-0.332826	No annotations available.
1105.07	504.8	3	0.002	C10:2	0.300507	No annotations available.
1137.68	366	3	0.003	C10:2	0.377684	No annotations available.
				C10:3	0.324282
1169.8	474.9	3	0.002	C10:2	0.30191	No annotations available.
1215.08	31.6	3	0	C10:3	-0.324997	No annotations available.
1224.33	280.4	3	0	C10:3	-0.310745	No annotations available.
1226.24	37.7	3	0.004	C10:3	0.35044	No annotations available.
				C10:2	0.3817
1237.61	552.4	3	0.004	C10:3	0.333891	Expand group to view annotations.
				C10:2	0.468573
						HMDB32780	3	Jujuboside C	C59H96O27	M+H
						HMDB35492	3	(3b16a)-Dihydroxy-12-oleanen-28-oic acid 3-glucosyl-(1-2)-arabinoside 28-rhamnosyl-(1-4)-glucosyl-(1-4)-glucosyl ester	C59H96O27	M+H
1251.64	559.6	3	0.002	C10:2	0.348177	No annotations available.
1259.12	563.2	3	0.002	C10:2	0.374056	No annotations available.
1261.78	275	3	0	C10:3	-0.339577	No annotations available.
1265.5	285	3	0	C10:3	-0.311723	No annotations available.
1290.2	563.7	3	0.002	C10:2	0.336385	No annotations available.
1296.66	558.6	3	0.019	C10:2	0.402429	No annotations available.
				C20:1	0.372332
1315.87	409.3	3	0.001	C10:3	0.313424	No annotations available.
1318.06	286.9	3	0	C10:2	-0.323648	No annotations available.
1325.17	559.6	3	0.002	C10:2	0.301766	No annotations available.
1333.06	277.5	3	0	C10:3	-0.350986	No annotations available.
1342.31	277.6	3	0.001	C10:3	0.318169	No annotations available.
1381.19	267.7	3	0.001	C10:3	0.322931	No annotations available.
1392.69	482.2	3	0.002	C10:2	0.362333	No annotations available.
1409.91	426.1	3	0	C10:3	-0.386657	No annotations available.
1410.26	274.2	3	0.001	C10:3	0.315424	No annotations available.
1411.42	402.3	3	0.001	C10:3	0.306789	No annotations available.
1438.99	292.1	3	0	C10:3	-0.308424	No annotations available.
1443.15	32.2	3	0	C10:3	-0.332006	No annotations available.
1555.76	536.3	3	0.002	C10:2	0.32433	No annotations available.
1709.84	543.8	3	0	C10:2	-0.322664	No annotations available.
1739.09	295.4	3	0	C10:3	-0.32971	No annotations available.
98.512	535.7	3	0.001	C10:3	0.304868	No annotations available.
111.969	564.1	3	0.001	C10:3	0.308234	No annotations available.
154.99	560.5	3	0.001	C10:3	0.323722	No annotations available.
209.974	597.6	3	0	C10:3	-0.302759	No annotations available.
214.953	597.8	3	0	C10:3	-0.327746	No annotations available.
				C10:2	-0.312565
236.957	597.5	3	0	C10:3	-0.303402	No annotations available.
				C18OH	-0.308348
238.217	12.9	3	0.001	C10:3	0.322574	No annotations available.
257.175	576.1	3	0	C10:3	-0.300052	Expand group to view annotations.
						HMDB30993	3	5-Nonyltetrahydro-2-oxo-3-furancarboxylic acid	C14H24O4	M+H
						HMDB36143	3	Monomenthyl succinate	C14H24O4	M+H
392.148	60.7	3	0	C10:3	-0.302273	No annotations available.
421.921	100.7	3	0.002	C10:2	0.328179	No annotations available.
422.327	68.9	3	0.002	C10:2	0.317179	Expand group to view annotations.
						HMDB06318	3	Gamma-linolenyl carnitine	C25H43NO4	M+H
						HMDB06319	3	Alpha-linolenyl carnitine	C25H43NO4	M+H
						LMFA07010893	3	(4S)-4-(6Z9Z12Z)-octadeca-6912-trienoyloxy-4-(trimethylazaniumyl)butanoate	C25H43NO4	M+H
478.942	597.8	3	0	C10:3	-0.319411	Expand group to view annotations.
						LMPK12112314	3	-	C15H10O12S3	M+H
523.298	521.1	3	0.001	C10:3	0.375314	No annotations available.
535.404	530.2	3	0.002	C10:2	0.300537	Expand group to view annotations.
						LMST05050029	3	Cholesteryl-alpha-D-glucopyranoside	C32H54O6	M+H
559.3	403.2	3	0.001	C10:3	0.33469	Expand group to view annotations.
						LMPK12111996	3	-	C35H42O6	M+H
973.629	551.4	3	0.001	C10:3	0.340411	No annotations available.
1087.67	419.6	3	0.002	C10:2	0.319295	No annotations available.
1120.74	42.7	3	0	C10:3	-0.357662	No annotations available.
95.0154	60.4	4	0.022	C20:2	0.339866	Expand group to view annotations.
				C20:1	0.326666
						HMDB04983	3	Dimethyl sulfone	C2H6O2S	M+H
150.054	248.9	4	0.013	C20:1	0.30149	Expand group to view annotations.
						HMDB04058	3	56-Dihydroxyindole	C8H7NO2	M+H
						HMDB60318	3	(S)-4-Hydroxymandelonitrile	C8H7NO2	M+H
						HMDB60946	3	NAPQI	C8H7NO2	M+H
152.143	368.1	4	0.007	C20:2	0.311877	Expand group to view annotations.
						HMDB15051	3	Amantadine	C10H17N	M+H
170.117	473	4	0.069	C20:1	0.322405	Expand group to view annotations.
				C20:0	0.354464
						HMDB38321	3	Homoarecoline	C9H15NO2	M+H
181.558	247.8	4	0.021	C20:2	0.323396	No annotations available.
				C20:1	0.318981
196.099	552.9	4	0.02	C20:1	0.309342	No annotations available.
				C20:2	0.300051
209.08	246.2	4	0	C20:2	-0.303594	Expand group to view annotations.
						HMDB12127	3	(R)-2-Benzylsuccinate	C11H12O4	M+H
						HMDB29185	3	5-(34-Dihydroxyphenyl)-gamma-valerolactone	C11H12O4	M+H
						HMDB34315	3	3-(34-Dimethoxyphenyl)-2-propenoic acid	C11H12O4	M+H
						HMDB36055	3	Furapiole	C11H12O4	M+H
						HMDB37308	3	1-(2-Methoxy-34-methylenedioxyphenyl)-1-propanone	C11H12O4	M+H
						HMDB38510	3	6-Methoxymellein	C11H12O4	M+H
						HMDB40892	3	3-(3-Methoxy-45-methylenedioxyphenyl)-2-propen-1-ol	C11H12O4	M+H
						HMDB41461	3	Anthriscinol	C11H12O4	M+H
						HMDB41692	3	5-(35-Dihydroxyphenyl)-gamma-valerolactone	C11H12O4	M+H
211.147	286.7	4	0	C20:1	-0.315227	No annotations available.
213.022	218.1	4	0	C20:2	-0.30719	No annotations available.
217.24	411.4	4	0.023	C20:1	0.360258	Expand group to view annotations.
				C20:2	0.30761
217.24	411.4	4	0.023	C20:1	0.360258	HMDB39429	3	Canavalmine	C11H28N4	M+H
233.153	488.9	4	0.014	C20:1	0.328935	Expand group to view annotations.
						HMDB30761	3	Pterosin O	C15H20O2	M+H
						HMDB30790	3	6-(34-Methylenedioxy)phenyl-33-dimethyl-1-hexene	C15H20O2	M+H
						HMDB31000	3	(Z)-8-Decene-46-diyn-1-yl 3-methylbutanoate	C15H20O2	M+H
						HMDB35412	3	1(10)11-Eremophiladiene-29-dione	C15H20O2	M+H
						HMDB35906	3	Alantolactone	C15H20O2	M+H
						HMDB35934	3	Isoalantolactone	C15H20O2	M+H
						HMDB36110	3	(S)-Bilobanone	C15H20O2	M+H
						HMDB36119	3	Alloalantolactone	C15H20O2	M+H
						HMDB36148	3	Furoeremophilone 1	C15H20O2	M+H
						HMDB36206	3	alpha-Amylcinnamyl formate	C15H20O2	M+H
						HMDB36688	3	Costunolide	C15H20O2	M+H
						HMDB36766	3	Furanogermenone	C15H20O2	M+H
						HMDB36881	3	Germacrone-13-al	C15H20O2	M+H
						HMDB37563	3	Turmeronol B	C15H20O2	M+H
						HMDB37608	3	Turmeronol A	C15H20O2	M+H
						HMDB39011	3	1311(13)-Eudesmatrien-12-oic acid	C15H20O2	M+H
						HMDB40902	3	(E)-9-(3-Furanyl)-26-dimethyl-26-nonadien-4-one	C15H20O2	M+H
						HMDB40981	3	(7b10a)-3-Hydroxy-135-cadinatrien-9-one	C15H20O2	M+H
						HMDB41038	3	Collybial	C15H20O2	M+H
						HMDB41062	3	1011-Epidioxycalamene	C15H20O2	M+H
						LMFA07010705	3	(8Z)-dec-8-en-46-diyn-1-yl 3-methylbutanoate	C15H20O2	M+H
						LMPR0103190013	3	(3aR5S8aR9aR)-58a-dimethyl-3-methylidene-3a56788a99a-octahydronaphtho23-bfuran-2(3H)-one	C15H20O2	M+H
261.188	52.8	4	0.022	C20:1	0.316995	No annotations available.
				C20:2	0.354229
281.098	536.9	4	0.007	C20:2	0.301475	Expand group to view annotations.
						HMDB28979	3	Methionyl-Methionine	C10H20N2O3S2	M+H
284.244	286.6	4	0	C20:0	-0.334193	No annotations available.
				C20:1	-0.301654
285.068	242.3	4	0.015	C20:1	0.339266	Expand group to view annotations.
						HMDB11164	3	L-beta-aspartyl-L-glutamic acid	C9H14N2O7	M+Na
						HMDB30413	3	Na-L-Glutamyl-L-aspartic acid	C9H14N2O7	M+Na
						HMDB30419	3	Ng-L-Glutamyl-L-aspartic acid	C9H14N2O7	M+Na
						HMDB60791	3	6-Thioinosinic acid	C10H12N4O4S	M+H
296.969	574.9	4	0.007	C20:2	0.300629	No annotations available.
306.041	177.8	4	0	C20:2	-0.311629	No annotations available.
323.038	50.4	4	0.087	C20:0	0.468636	No annotations available.
				C20:1	0.321823
337.251	274	4	0	C20:0	-0.403899	No annotations available.
				C20:1	-0.401089
				C18OH	-0.308776
				C20:2	-0.371714
339.252	347.3	4	0.094	C20:1	0.395309	Expand group to view annotations.
				C20:0	0.436157
				C20:2	0.385129
						HMDB02265	3	1415-DiHETrE	C20H34O4	M+H
						HMDB02311	3	89-DiHETrE	C20H34O4	M+H
						HMDB02314	3	1112-DiHETrE	C20H34O4	M+H
						HMDB02343	3	56-DHET	C20H34O4	M+H
						HMDB02995	3	12-Keto-tetrahydro-leukotriene B4	C20H34O4	M+H
						HMDB12504	3	1011-dihydro-leukotriene B4	C20H34O4	M+H
						HMDB12838	3	67-dihydro-12-epi-LTB4	C20H34O4	M+H
						HMDB35379	3	Sterebin E	C20H34O4	M+H
						HMDB60106	3	15-Hydroperoxyeicosa-8Z11Z13E-trienoate	C20H34O4	M+H
						LMFA03000014	3	8R9S-epoxy-10S-hydroxy-11Z14Z-eicosadienoic acid	C20H34O4	M+H
						LMFA03010054	3	9-oxo-15S-hydroxy-13E-prostaenoic acid	C20H34O4	M+H
						LMFA03010078	3	9S15S-dihydroxy-5Z13E-prostadienoic acid	C20H34O4	M+H
						LMFA03010164	3	9R15S-dihydroxy-5Z13E-prostadienoic acid	C20H34O4	M+H
						LMFA03020004	3	5S-hydroxy-12-keto-6Z8E-eicosadienoic acid	C20H34O4	M+H
						LMFA03020045	3	(5R6Z8E12R14Z)-512-dihydroxyicosa-6814-trienoic acid	C20H34O4	M+H
						LMFA03020070	3	(5R8E10E12R14Z)-512-dihydroxyicosa-81014-trienoic acid	C20H34O4	M+H
						LMFA03050004	3	56-dihydroxy-8Z11Z14Z-eicosatrienoic acid	C20H34O4	M+H
						LMFA03050006	3	89-dihydroxy-5Z11Z14Z-eicosatrienoic acid	C20H34O4	M+H
						LMFA03050008	3	1112-dihydroxy-5Z8Z14Z-eicosatrienoic acid	C20H34O4	M+H
						LMFA03050010	3	1415-dihydroxy-5Z8Z11Z-eicosatrienoic acid	C20H34O4	M+H
						LMFA03050015	3	56-dihydroxy-81114-eicosatrienoic acid	C20H34O4	M+H
						LMFA03050016	3	89-dihydroxy-51114-eicosatrienoic acid	C20H34O4	M+H
340.237	312.4	4	0.071	C20:0	0.367633	Expand group to view annotations.
340.237	312.4	4	0.071	C20:1	0.330305
340.237	312.4	4	0.071	C20:0	0.367633	HMDB14425	3	Disopyramide	C21H29N3O	M+H
352.176	496.6	4	0.01	C20:2	0.332928	Expand group to view annotations.
352.176	496.6	4	0.01	C18OH	0.317182
352.176	496.6	4	0.01	C20:2	0.332928	HMDB14808	3	Pirenzepine	C19H21N5O2	M+H
352.961	97	4	0.007	C20:2	0.32249	No annotations available.
355.261	317.1	4	0	C20:1	-0.363677	Expand group to view annotations.
				C20:2	-0.361076
						HMDB13627	3	Cervonoyl ethanolamide	C24H36O3	M+H-H2O
						HMDB14629	3	Nabilone	C24H36O3	M+H-H2O
						HMDB41301	3	(3R 6Z)-34-Dihydro-8-hydroxy-3-(6-pentadecenyl)-1H-2-benzopyran-1-one	C24H36O3	M+H-H2O
						LMST03020021	3	(5Z7E)-(3S)-3-hydroxy-910-seco-5710(19)-cholatrien-24-oic acid	C24H36O3	M+H-H2O
						LMST04010233	3	3-oxochol-4-en-24-oic acid	C24H36O3	M+H-H2O
						LMST04010275	3	3-Oxo-5beta-chol-1-en-24-oic Acid	C24H36O3	M+H-H2O
						LMST04010287	3	(22E)-3beta-Hydroxy-5alpha-chola-722-dien-24-oic Acid	C24H36O3	M+H-H2O
						LMST04010293	3	3-Oxo-5beta-chol-9(11)-en-24-oic Acid	C24H36O3	M+H-H2O
						LMST04010296	3	3-Oxo-5beta-chol-14-en-24-oic Acid	C24H36O3	M+H-H2O
						LMST04010297	3	3-Oxo-5beta-chol-7-en-24-oic Acid	C24H36O3	M+H-H2O
						LMST04010299	3	3alpha-Hydroxy-5beta-chola-814-dien-24-oic Acid	C24H36O3	M+H-H2O
						LMST04010320	3	(20S22E)-3beta-Hydroxychola-522-dien-24-oic Acid	C24H36O3	M+H-H2O
						LMST04010321	3	(22E)-3beta-Hydroxychola-522-dien-24-oic Acid	C24H36O3	M+H-H2O
						LMST04010329	3	3alpha-Hydroxy-5beta-chola-8(14)11-dien-24-oic Acid	C24H36O3	M+H-H2O
						LMST04010330	3	3alpha-Hydroxy-5beta-chola-79(11)-dien-24-oic Acid	C24H36O3	M+H-H2O
						LMST04010340	3	(22E)-3beta-Hydroxy-5alpha-chola-1622-dien-24-oic Acid	C24H36O3	M+H-H2O
						LMST04010376	3	3-Oxo-5beta-chol-8-en-24-oic Acid	C24H36O3	M+H-H2O
						LMST04010377	3	3-Oxo-5beta-chol-8(14)-en-24-oic Acid	C24H36O3	M+H-H2O
						LMST04010379	3	3-Oxo-5beta-chol-6-en-24-oic Acid	C24H36O3	M+H-H2O
						LMST04010408	3	3-Oxo-5beta14beta-chol-8-en-24-oic Acid	C24H36O3	M+H-H2O
						LMST04010433	3	3beta-Hydroxychola-57-dien-24-oic Acid	C24H36O3	M+H-H2O
						LMST04010436	3	3beta-Hydroxychola-516-dien-24-oic Acid	C24H36O3	M+H-H2O
						LMST04010437	3	(20S)-3beta-Hydroxychola-516-dien-24-oic Acid	C24H36O3	M+H-H2O
						HMDB39760	3	11-112-Dodecanediylbis(oxy)bisbenzene	C24H34O2	M+H
						LMFA01030852	3	2E6Z9Z12Z15Z18Z21Z-tetracosaheptaenoic acid	C24H34O2	M+H
						LMST04010327	3	5beta-Chola-38(14)11-trien-24-oic Acid	C24H34O2	M+H
372.288	438.6	4	0.007	C20:2	0.31455	Expand group to view annotations.
						HMDB13658	3	Docosahexaenoyl Ethanolamide	C24H37NO2	M+H
						LMFA08040009	3	N-(4Z7Z10Z13Z16Z19Z-docosahexaenoyl)-ethanolamine	C24H37NO2	M+H
373.272	319.7	4	0	C20:2	-0.342384	Expand group to view annotations.
				C20:1	-0.346437
						HMDB13627	3	Cervonoyl ethanolamide	C24H36O3	M+H
						HMDB14629	3	Nabilone	C24H36O3	M+H
						HMDB41301	3	(3R 6Z)-34-Dihydro-8-hydroxy-3-(6-pentadecenyl)-1H-2-benzopyran-1-one	C24H36O3	M+H
						LMST03020021	3	(5Z7E)-(3S)-3-hydroxy-910-seco-5710(19)-cholatrien-24-oic acid	C24H36O3	M+H
						LMST04010233	3	3-oxochol-4-en-24-oic acid	C24H36O3	M+H
						LMST04010275	3	3-Oxo-5beta-chol-1-en-24-oic Acid	C24H36O3	M+H
						LMST04010287	3	(22E)-3beta-Hydroxy-5alpha-chola-722-dien-24-oic Acid	C24H36O3	M+H
						LMST04010293	3	3-Oxo-5beta-chol-9(11)-en-24-oic Acid	C24H36O3	M+H
						LMST04010296	3	3-Oxo-5beta-chol-14-en-24-oic Acid	C24H36O3	M+H
						LMST04010297	3	3-Oxo-5beta-chol-7-en-24-oic Acid	C24H36O3	M+H
						LMST04010299	3	3alpha-Hydroxy-5beta-chola-814-dien-24-oic Acid	C24H36O3	M+H
						LMST04010320	3	(20S22E)-3beta-Hydroxychola-522-dien-24-oic Acid	C24H36O3	M+H
						LMST04010321	3	(22E)-3beta-Hydroxychola-522-dien-24-oic Acid	C24H36O3	M+H
						LMST04010329	3	3alpha-Hydroxy-5beta-chola-8(14)11-dien-24-oic Acid	C24H36O3	M+H
						LMST04010330	3	3alpha-Hydroxy-5beta-chola-79(11)-dien-24-oic Acid	C24H36O3	M+H
						LMST04010340	3	(22E)-3beta-Hydroxy-5alpha-chola-1622-dien-24-oic Acid	C24H36O3	M+H
						LMST04010376	3	3-Oxo-5beta-chol-8-en-24-oic Acid	C24H36O3	M+H
						LMST04010377	3	3-Oxo-5beta-chol-8(14)-en-24-oic Acid	C24H36O3	M+H
						LMST04010379	3	3-Oxo-5beta-chol-6-en-24-oic Acid	C24H36O3	M+H
						LMST04010408	3	3-Oxo-5beta14beta-chol-8-en-24-oic Acid	C24H36O3	M+H
						LMST04010433	3	3beta-Hydroxychola-57-dien-24-oic Acid	C24H36O3	M+H
						LMST04010436	3	3beta-Hydroxychola-516-dien-24-oic Acid	C24H36O3	M+H
						LMST04010437	3	(20S)-3beta-Hydroxychola-516-dien-24-oic Acid	C24H36O3	M+H
374.288	318.2	4	0.025	C18OH	0.330195	No annotations available.
				C20:1	0.317059
				C20:2	0.372228
374.316	322	4	0.024	C20:1	0.366438	No annotations available.
				C20:2	0.35812
376.211	409.6	4	0.065	C20:1	0.322763	No annotations available.
				C20:0	0.33058
388.856	40	4	0.062	C20:0	0.305068	No annotations available.
				C20:1	0.332453
400.331	330.3	4	0.021	C20:1	0.323796	No annotations available.
				C20:2	0.304613
402.747	84.7	4	0	C20:0	-0.399878	No annotations available.
				C20:1	-0.343934
414.377	274.1	4	0	C20:2	-0.328659	No annotations available.
422.181	514.7	4	0.09	C20:1	0.350062	No annotations available.
				C20:0	0.478174
426.778	102.3	4	0	C20:2	-0.36943	Expand group to view annotations.
						HMDB08518	3	PC(20:5(5Z8Z11Z14Z17Z)22:6(4Z7Z10Z13Z16Z19Z))	C50H78NO8P	M+2H
						HMDB08741	3	PC(22:6(4Z7Z10Z13Z16Z19Z)20:5(5Z8Z11Z14Z17Z))	C50H78NO8P	M+2H
						LMGP01011059	3	1-(5Z8Z11Z14Z17Z-eicosapentaenoyl)-2-(4Z7Z10Z13Z16Z19Z-docosahexaenoyl)-sn-glycero-3-phosphocholine	C50H78NO8P	M+2H
						LMGP01012120	3	1-(4Z7Z10Z13Z16Z19Z-docosahexaenoyl)-2-(5Z8Z11Z14Z17Z-eicosapentaenoyl)-glycero-3-phosphocholine	C50H78NO8P	M+2H
427.322	290.3	4	0	C20:2	-0.347198	Expand group to view annotations.
				C20:1	-0.357456
						HMDB12562	3	13-Hydroxy-gamma-tocotrienol	C28H42O3	M+H
						HMDB36304	3	(3beta5alpha6alpha7alpha22E24R)-56-Epoxyergosta-81422-triene-37-diol	C28H42O3	M+H
						LMST01031071	3	11alpha-hydroxy-5beta6beta-epoxy-24-methylenecholest-2-en-1-one	C28H42O3	M+H
						LMST01031072	3	11alpha-hydroxy-5beta6beta-epoxy-ergosta-222E-dien-1-one	C28H42O3	M+H
						LMST01031100	3	6beta11alpha-dihydroxy-ergosta-2422E-trien-1-one	C28H42O3	M+H
						LMST01031101	3	6beta11alpha-dihydroxy-24-methylene-cholesta-24-dien-1-one	C28H42O3	M+H
						LMST03020314	3	(5Z7E22E24E)-(1S3R)-24a-homo-910-seco-5710(19)2224-cholestapentaene-1325-triol	C28H42O3	M+H
						LMST03020576	3	(5Z7E)-(1S3S)-1-hydroxymethyl-910-seco-5710(19)-cholestatrien-23-yne-325-diol	C28H42O3	M+H
						LMST03020577	3	(5Z7E)-(1R3R)-1-hydroxymethyl-910-seco-5710(19)-cholestatrien-23-yne-325-diol	C28H42O3	M+H
						LMST04030213	3	(25S)-3-oxo-cholest-14-dien-26-oic acid	C28H42O3	M+H
427.769	98.2	4	0	C20:1	-0.364751	No annotations available.
				C20:0	-0.516087
431.384	557.4	4	0	C20:1	-0.323158	Expand group to view annotations.
						HMDB01893	3	Alpha-Tocopherol	C29H50O2	M+H
						HMDB12171	3	4alpha-Hydroxymethyl-4beta-methyl-5alpha-cholesta-8-en-3beta-ol	C29H50O2	M+H
						HMDB30022	3	Ikshusterol	C29H50O2	M+H
						HMDB59642	3	4-beta-Hydroxymethyl-4-alpha-methyl-5-alpha-cholest-7-en-3-beta-ol	C29H50O2	M+H
						LMPR02020001	3	(2R)-2578-tetramethyl-2-(4R8R)-4812-trimethyltridecyl-34-dihydro-2H-chromen-6-ol	C29H50O2	M+H
						LMST01010203	3	4beta-(hydroxymethyl)-4-methyl-5alpha-cholest-7-en-3beta-ol 4beta-(hydroxymethyl)-4alpha-methyl-5alpha-cholest-7-en-3beta-ol	C29H50O2	M+H
						LMST01010233	3	4alpha-hydroxymethyl-4beta-methyl-5alpha-cholesta-8-en-3beta-ol	C29H50O2	M+H
						LMST01030143	3	4alpha24beta-Dimethyl-5alpha-cholest-22-en-3beta-4beta-diol	C29H50O2	M+H
						LMST01040195	3	stigmast-5-en-3beta22S-diol	C29H50O2	M+H
						LMST01040258	3	14-(5-ethyl-6-methylheptan-2-yl)-215-dimethyltetracyclo87002701115heptadec-7-ene-59-diol	C29H50O2	M+H
						LMST03020441	3	(5E7E)-(3S10R)-10-ethoxy-910-seco-57-cholestadien-3-ol	C29H50O2	M+H
						LMST03020442	3	(5E7E)-(3S10S)-10-ethoxy-910-seco-57-cholestadien-3-ol	C29H50O2	M+H
						LMST03020443	3	(5Z7E)-(3S10R)-10-ethoxy-910-seco-57-cholestadien-3-ol	C29H50O2	M+H
435.276	100.1	4	0.022	C20:1	0.321227	Expand group to view annotations.
				C20:2	0.35811
						HMDB33030	3	(12S15S)-15-O-Demethyl-1029-dideoxy-1112-dihydro-striatin C	C25H38O6	M+H
						HMDB37511	3	Butyl oleate sulfate	C22H42O6S	M+H
						HMDB40389	3	Erinacine C	C25H38O6	M+H
441.375	397.2	4	0.061	C20:0	0.303294	Expand group to view annotations.
				C20:1	0.321712
						HMDB01421	3	44-Dimethyl-14a-formyl-5a-cholesta-824-dien-3b-ol	C30H48O2	M+H
						HMDB33257	3	Myricolal	C30H48O2	M+H
						HMDB34506	3	Soyasapogenol C	C30H48O2	M+H
						HMDB34511	3	Oleanolic aldehyde	C30H48O2	M+H
						HMDB35314	3	Ganoderol B	C30H48O2	M+H
						HMDB35355	3	3beta-3-Hydroxy-18-lupen-21-one	C30H48O2	M+H
						HMDB36774	3	Sebiferic acid	C30H48O2	M+H
						HMDB36800	3	3beta-Hydroxy-22(30)-hopen-29-al	C30H48O2	M+H
						HMDB37033	3	28-Hydroxy-14-taraxeren-3-one	C30H48O2	M+H
						HMDB39642	3	Rofficerone	C30H48O2	M+H
						LMFA01030840	3	12Z15Z18Z21Z24Z27Z-triacontahexaenoic acid	C30H48O2	M+H
						LMST01010222	3	44-dimethyl-14alpha-formyl-5alpha-cholesta-824-dien-3beta-ol	C30H48O2	M+H
						LMST01040183	3	4-methylene-15-oxo-5alpha-poriferast-8(9)-en-3beta-ol	C30H48O2	M+H
						LMST03010065	3	(5Z7E22E)-(1S3R)-2627-dihomo-910-seco-5710(19)22-ergostatetraen-13-diol	C30H48O2	M+H
						LMST03010066	3	(5Z7E22E)-(1S3R24S)-24-methyl-2627-dihomo-910-seco-5710(19)22-ergostatetraen-13-diol	C30H48O2	M+H
447.605	58	4	0	C20:1	-0.301878	No annotations available.
452.78	19.7	4	0.021	C20:2	0.327933	No annotations available.
				C20:1	0.309257
458.265	337.6	4	0	C20:1	-0.309158	Expand group to view annotations.
						HMDB11478	3	LysoPE(0:018:3(6Z9Z12Z))	C23H42NO7P	M+H-H2O
						HMDB11479	3	LysoPE(0:018:3(9Z12Z15Z))	C23H42NO7P	M+H-H2O
						HMDB11508	3	LysoPE(18:3(6Z9Z12Z)0:0)	C23H42NO7P	M+H-H2O
						HMDB11509	3	LysoPE(18:3(9Z12Z15Z)0:0)	C23H42NO7P	M+H-H2O
						LMGP02050017	3	1-(6Z9Z12Z-octadecatrienoyl)-glycero-3-phosphoethanolamine	C23H42NO7P	M+H-H2O
						LMGP02050029	3	1-(9Z12Z15Z-octadecatrienoyl)-glycero-3-phosphoethanolamine	C23H42NO7P	M+H-H2O
						LMGP02050042	3	(2-aminoethoxy)(2R)-3-hydroxy-2-(6Z9Z12Z)-octadeca-6912-trienoyloxypropoxyphosphinic acid	C23H42NO7P	M+H-H2O
						LMGP02050043	3	(2-aminoethoxy)(2R)-3-hydroxy-2-(9Z12Z15Z)-octadeca-91215-trienoyloxypropoxyphosphinic acid	C23H42NO7P	M+H-H2O
467.31	542.4	4	0.031	C20:1	0.477455	Expand group to view annotations.
				C20:2	0.46153
467.31	542.4	4	0.031	C20:1	0.477455	LMGP10050018	3	1-eicosanoyl-glycero-3-phosphate	C23H47O7P	M+H
467.31	542.4	4	0.031	C20:1	0.477455	LMST03010010	3	(5Z7E22E)-(3S24RS)-282828-trifluoro-910-seco-5710(19)22-ergostatetraene-325-diol	C28H41F3O2	M+H
471.173	261.4	4	0.015	C20:1	0.342051	Expand group to view annotations.
471.173	261.4	4	0.015	C20:1	0.342051	HMDB61104	3	7-hydroxymethotrexate	C20H22N8O6	M+H
472.324	553.2	4	0.023	C20:2	0.387907	Expand group to view annotations.
				C20:1	0.329668
472.324	553.2	4	0.023	C20:2	0.387907	HMDB14486	3	Terfenadine	C32H41NO2	M+H
473.286	552.1	4	0.083	C20:0	0.426865	Expand group to view annotations.
				C20:1	0.379395
						HMDB33899	3	Ixocarpanolide	C28H40O6	M+H
						HMDB37379	3	Vamonolide	C28H40O6	M+H
						HMDB38704	3	Macrocarpal B	C28H40O6	M+H
						HMDB38733	3	Macrocarpal D	C28H40O6	M+H
						HMDB38734	3	Macrocarpal E	C28H40O6	M+H
						HMDB41586	3	Macrocarpal H	C28H40O6	M+H
480.211	347.3	4	0.027	C20:2	0.378364	Expand group to view annotations.
				C20:1	0.420236
480.211	347.3	4	0.027	C20:2	0.378364	HMDB14760	3	Nicardipine	C26H29N3O6	M+H
480.834	419.7	4	0.067	C20:0	0.348532	No annotations available.
				C20:1	0.30097
489.247	335.5	4	0	C20:2	-0.308245	Expand group to view annotations.
						HMDB02421	3	7-Sulfocholic acid	C24H40O8S	M+H
						HMDB15262	3	Prednicarbate	C27H36O8	M+H
						LMST05020039	3	-	C24H40O8S	M+H
493.362	297.1	4	0	C20:2	-0.335573	No annotations available.
				C20:1	-0.330045
494.8	109.9	4	0	C20:0	-0.335312	No annotations available.
				C20:1	-0.335547
502.266	552.1	4	0.013	C20:1	0.307029	No annotations available.
505.242	299.3	4	0	C20:1	-0.300355	Expand group to view annotations.
				C20:2	-0.336598
				C18OH	-0.324604
505.242	299.3	4	0	C20:1	-0.300355	HMDB39122	3	Crocin 4	C27H36O9	M+H
505.242	299.3	4	0	C20:1	-0.300355	LMFA03120005	3	methyl 4R12S20-triacetoxy-9-oxo-5Z7E10Z13Z-prostatetraenoate-cyclo812	C27H36O9	M+H
505.242	299.3	4	0	C20:1	-0.300355	LMFA03120006	3	methyl 4R12S20-triacetoxy-9-oxo-5E7E10Z13Z-prostatetraenoate-cyclo812	C27H36O9	M+H
505.242	299.3	4	0	C20:1	-0.300355	LMFA03120007	3	methyl 4R12S20-triacetoxy-9-oxo-5E7Z10Z13Z-prostatetraenoate-cyclo812	C27H36O9	M+H
508.434	559.3	4	0.074	C20:1	0.348775	No annotations available.
				C20:2	0.350359
				C20:0	0.325267
509.244	301	4	0	C20:2	-0.346822	No annotations available.
				C20:1	-0.362655
				C18OH	-0.32344
514.107	564	4	0.023	C20:1	0.348697	No annotations available.
				C20:2	0.325047
516.137	342.8	4	0.08	C20:1	0.302271	No annotations available.
				C20:0	0.429738
524.271	361.2	4	0.025	C20:2	0.430322	No annotations available.
				C20:1	0.357224
524.791	45.3	4	0.014	C20:1	0.3174	No annotations available.
527.784	510.2	4	0	C20:1	-0.321199	No annotations available.
				C20:0	-0.462305
533.27	566.2	4	0.07	C20:0	0.363193	No annotations available.
				C20:1	0.305635
535.266	324.7	4	0.007	C20:2	0.30797	Expand group to view annotations.
						HMDB31150	3	Pyrophaeophorbide a	C33H34N4O3	M+H
543.362	518.1	4	0.007	C20:2	0.31152	No annotations available.
545.414	542.6	4	0.022	C20:1	0.307027	No annotations available.
				C20:2	0.363059
549.423	300	4	0	C20:1	-0.303712	No annotations available.
551.279	560.2	4	0.073	C20:0	0.380374	Expand group to view annotations.
				C20:1	0.321368
						LMFA08020185	3	(2E4E6R)-N-(1S5S6R)-5-hydroxy-5-(1E3E5E)-7-(2-hydroxy-5-oxo-cyclopenten-1-yl)amino-7-oxo-hepta-135-trienyl-2-oxo-7-oxabicyclo410hept-3-en-3-yl-246-trimethyl-deca-24-dienamide	C31H38N2O7	M+H
552.273	501.5	4	0	C20:0	-0.400343	No annotations available.
				C20:1	-0.336835
				C20:2	-0.314005
558.457	575.7	4	0.007	C20:2	0.32077	No annotations available.
559.322	532.1	4	0.007	C20:2	0.3	Expand group to view annotations.
						HMDB34927	3	Cucurbitacin B	C32H46O8	M+H
						LMGP06060003	3	1-hexadecyl-glycero-3-phospho-(1-myo-inositol)	C25H51O11P	M+H
						LMST01010104	3	-	C32H46O8	M+H
565.33	511.6	4	0.056	C20:0	0.314578	No annotations available.
				C20:2	0.303901
573.409	511.9	4	0.009	C20:2	0.382915	Expand group to view annotations.
						HMDB32835	3	22-Angeloylbarringtogenol C	C35H56O6	M+H
						HMDB33089	3	(3b5a22E24S)-Stigmasta-72225-trien-3-ol 3-glucoside	C35H56O6	M+H
579.327	444.3	4	0	C20:0	-0.36809	No annotations available.
				C20:1	-0.329435
584.757	269.6	4	0.013	C20:1	0.305604	No annotations available.
589.406	485.1	4	0.075	C20:2	0.317681	Expand group to view annotations.
				C20:0	0.347038
				C20:1	0.313002
						HMDB32831	3	22-Angeloyltheasapogenol A	C35H56O7	M+H
						HMDB35103	3	Lansioside C	C35H56O7	M+H
						HMDB40524	3	Sanguisorbin B	C35H56O7	M+H
591.383	462	4	0.007	C20:2	0.305124	No annotations available.
596.413	500.3	4	0.008	C20:2	0.330512	Expand group to view annotations.
						HMDB34194	3	Jurubine	C33H57NO8	M+H
						LMST01070002	3	3beta-amino-26-O-beta-D-glucopyranosyl-25R-furostan-22alpha26-diol	C33H57NO8	M+H
606.292	365.4	4	0.069	C20:1	0.301966	No annotations available.
				C20:0	0.358795
615.16	572.6	4	0.007	C20:2	0.324076	Expand group to view annotations.
						HMDB01176	3	Cytidine monophosphate N-acetylneuraminic acid	C20H31N4O16P	M+H
						HMDB03249	3	Rutin	C27H30O16	M+H_[+4]
						HMDB29258	3	Luteolin 6-C-glucoside 8-C-arabinoside	C27H30O16	M+H_[+4]
						HMDB29478	3	Meloside L	C27H30O16	M+H_[+4]
						HMDB29812	3	Quercetin 8-C-(2-rhamnosylglucoside)	C27H30O16	M+H_[+4]
						HMDB32908	3	Kaempferol 7-sophoroside	C27H30O16	M+H_[+4]
						HMDB33824	3	Isoorientin 7-glucoside	C27H30O16	M+H_[+4]
						HMDB37431	3	Allivicin	C27H30O16	M+H_[+4]
						HMDB37433	3	Paeonoside	C27H30O16	M+H_[+4]
						HMDB37534	3	Panasenoside	C27H30O16	M+H_[+4]
						HMDB37538	3	Quercetin 3-galactoside 7-rhamnoside	C27H30O16	M+H_[+4]
						HMDB37933	3	Calendoflavobioside	C27H30O16	M+H_[+4]
						HMDB37934	3	Quercetin 7-rutinoside	C27H30O16	M+H_[+4]
						HMDB37935	3	Multinoside A	C27H30O16	M+H_[+4]
						HMDB39383	3	Quercetin 7-(rhamnosylglucoside)	C27H30O16	M+H_[+4]
						HMDB40486	3	Quercetin 3-(2-glucosylrhamnoside)	C27H30O16	M+H_[+4]
						HMDB40489	3	Isoquercitrin 4-rhamnoside	C27H30O16	M+H_[+4]
						HMDB40490	3	Isorhamnetin 3-O-b-D-xylopyranosyl-(1-6)-b-D-glucopyranoside	C27H30O16	M+H_[+4]
						HMDB40715	3	Rheinoside A	C27H30O16	M+H_[+4]
634.414	590.4	4	0	C20:2	-0.302734	No annotations available.
637.425	488.8	4	0.014	C20:1	0.317251	No annotations available.
637.438	578.3	4	0.009	C10:3	0.315186	No annotations available.
				C20:2	0.351583
639.187	359	4	0.013	C20:1	0.300388	Expand group to view annotations.
						HMDB37462	3	Tricin 7-neohesperidoside	C29H34O16	M+H
						HMDB37467	3	Rhamnazin 3-rutinoside	C29H34O16	M+H
						LMPK12050377	3	-	C29H34O16	M+H
						LMPK12110608	3	-	C29H34O16	M+H
						LMPK12110609	3	-	C29H34O16	M+H
						LMPK12110862	3	-	C29H34O16	M+H
						LMPK12110866	3	-	C29H34O16	M+H
						LMPK12111204	3	-	C29H34O16	M+H
						LMPK12111225	3	-	C29H34O16	M+H
						LMPK12111575	3	34-Dihydroxy-735-trimethoxyflavone 3-galactosyl-(1-4)-xyloside	C29H34O16	M+H
						LMPK12112634	3	-	C29H34O16	M+H
						LMPK12112646	3	-	C29H34O16	M+H
						LMPK12112647	3	-	C29H34O16	M+H
						LMPK12112675	3	-	C29H34O16	M+H
						LMPK12112736	3	-	C29H34O16	M+H
640.547	563.3	4	0.007	C20:2	0.317534	No annotations available.
645.347	548.5	4	0	C20:1	-0.343666	Expand group to view annotations.
				C20:0	-0.330482
				C20:2	-0.334561
						HMDB30736	3	Capsianoside IV	C32H52O13	M+H
						HMDB38376	3	Goshonoside F3	C32H52O13	M+H
655.183	276.1	4	0.014	C20:1	0.314113	Expand group to view annotations.
						HMDB37470	3	Spinacetin 3-rutinoside	C29H34O17	M+H
						HMDB37579	3	Limocitrin 3-rutinoside	C29H34O17	M+H
						HMDB38235	3	Rhamnazin 3-sophoroside	C29H34O17	M+H
						LMPK12050397	3	-	C29H34O17	M+H
						LMPK12110610	3	-	C29H34O17	M+H
						LMPK12110857	3	-	C29H34O17	M+H
						LMPK12110858	3	-	C29H34O17	M+H
						LMPK12110867	3	-	C29H34O17	M+H
						LMPK12111262	3	-	C29H34O17	M+H
						LMPK12112489	3	-	C29H34O17	M+H
						LMPK12112497	3	-	C29H34O17	M+H
						LMPK12112630	3	-	C29H34O17	M+H
						LMPK12113191	3	-	C29H34O17	M+H
						LMPK12113211	3	-	C29H34O17	M+H
660.66	43.4	4	0.007	C20:2	0.314088	Expand group to view annotations.
						LMSP00000011	3	N-(17Z-hexacosenoyl)-1-deoxysphing-4-enine	C44H85NO2	M+H
669.953	588.5	4	0	C20:1	-0.314621	No annotations available.
673.019	523.4	4	0	C20:0	-0.402279	No annotations available.
				C20:2	-0.308835
685.131	439.8	4	0.008	C20:2	0.363725	No annotations available.
689.905	55.4	4	0	C20:1	-0.304743	No annotations available.
704.887	415.4	4	0	C20:1	-0.341482	No annotations available.
				C20:0	-0.30672
				C20:2	-0.329883
705.301	506.4	4	0.014	C20:1	0.322302	No annotations available.
707.301	508	4	0.015	C20:1	0.337674	Expand group to view annotations.
						HMDB60896	3	N-Desmethylritonavir	C36H46N6O5S2	M+H
711.33	557.9	4	0.008	C20:2	0.347529	No annotations available.
718.535	465	4	0	C20:2	-0.329883	Expand group to view annotations.
						HMDB07936	3	PC(15:016:1(9Z))	C39H76NO8P	M+H
						HMDB08000	3	PC(16:1(9Z)15:0)	C39H76NO8P	M+H
						HMDB08834	3	PE(14:020:1(11Z))	C39H76NO8P	M+H
						HMDB08866	3	PE(14:1(9Z)20:0)	C39H76NO8P	M+H
						HMDB08926	3	PE(16:018:1(11Z))	C39H76NO8P	M+H
						HMDB08927	3	PE(16:018:1(9Z))	C39H76NO8P	M+H
						HMDB08958	3	PE(16:1(9Z)18:0)	C39H76NO8P	M+H
						HMDB08990	3	PE(18:016:1(9Z))	C39H76NO8P	M+H
						HMDB09022	3	PE(18:1(11Z)16:0)	C39H76NO8P	M+H
						HMDB09055	3	PE(18:1(9Z)16:0)	C39H76NO8P	M+H
						HMDB09218	3	PE(20:014:1(9Z))	C39H76NO8P	M+H
						HMDB09250	3	PE(20:1(11Z)14:0)	C39H76NO8P	M+H
						LMGP01010002	3	1-hexadecanoyl-2-(14-pentadecenoyl)-sn-glycero-3-phosphocholine	C39H76NO8P	M+H
						LMGP01010008	3	1-heptadecanoyl-2-(9Z-tetradecenoyl)-sn-glycero-3-phosphocholine	C39H76NO8P	M+H
						LMGP01010535	3	1-pentadecanoyl-2-(9Z-hexadecenoyl)-sn-glycero-3-phosphocholine	C39H76NO8P	M+H
						LMGP01011328	3	1-dodecanoyl-2-(9Z-nonadecenoyl)-glycero-3-phosphocholine	C39H76NO8P	M+H
						LMGP01011347	3	1-tridecanoyl-2-(9Z-octadecenoyl)-glycero-3-phosphocholine	C39H76NO8P	M+H
						LMGP01011367	3	1-tetradecanoyl-2-(9Z-heptadecenoyl)-glycero-3-phosphocholine	C39H76NO8P	M+H
						LMGP01011386	3	1-(9Z-tetradecenoyl)-2-heptadecanoyl-glycero-3-phosphocholine	C39H76NO8P	M+H
						LMGP01011437	3	1-(9Z-pentadecenoyl)-2-hexadecanoyl-glycero-3-phosphocholine	C39H76NO8P	M+H
						LMGP01011464	3	1-hexadecanoyl-2-(9Z-pentadecenoyl)-glycero-3-phosphocholine	C39H76NO8P	M+H
						LMGP01011477	3	1-(9Z-hexadecenoyl)-2-pentadecanoyl-glycero-3-phosphocholine	C39H76NO8P	M+H
						LMGP01011523	3	1-(9Z-heptadecenoyl)-2-tetradecanoyl-glycero-3-phosphocholine	C39H76NO8P	M+H
						LMGP01011596	3	1-(9Z-octadecenoyl)-2-tridecanoyl-glycero-3-phosphocholine	C39H76NO8P	M+H
						LMGP01011756	3	1-(9Z-nonadecenoyl)-2-dodecanoyl-glycero-3-phosphocholine	C39H76NO8P	M+H
						LMGP02010009	3	1-hexadecanoyl-2-(9Z-octadecenoyl)-sn-glycero-3-phosphoethanolamine	C39H76NO8P	M+H
						LMGP02010010	3	1-hexadecanoyl-2-(11Z-octadecenoyl)-sn-glycero-3-phosphoethanolamine	C39H76NO8P	M+H
						LMGP02010099	3	1-(9Z-octadecenoyl)-2-hexadecanoyl-sn-glycero-3-phosphoethanolamine	C39H76NO8P	M+H
						LMGP02010311	3	1-hexadecanoyl-2-(7Z-octadecenoyl)-sn-glycero-3-phosphoethanolamine	C39H76NO8P	M+H
						LMGP02010378	3	1-dodecanoyl-2-(11Z-docosenoyl)-glycero-3-phosphoethanolamine	C39H76NO8P	M+H
						LMGP02010415	3	1-tetradecanoyl-2-(11Z-eicosenoyl)-glycero-3-phosphoethanolamine	C39H76NO8P	M+H
						LMGP02010440	3	1-(9Z-tetradecenoyl)-2-eicosanoyl-glycero-3-phosphoethanolamine	C39H76NO8P	M+H
						LMGP02010462	3	1-pentadecanoyl-2-(9Z-nonadecenoyl)-glycero-3-phosphoethanolamine	C39H76NO8P	M+H
						LMGP02010491	3	1-(9Z-pentadecenoyl)-2-nonadecanoyl-glycero-3-phosphoethanolamine	C39H76NO8P	M+H
						LMGP02010524	3	1-(9Z-hexadecenoyl)-2-octadecanoyl-glycero-3-phosphoethanolamine	C39H76NO8P	M+H
						LMGP02010544	3	1-heptadecanoyl-2-(9Z-heptadecenoyl)-glycero-3-phosphoethanolamine	C39H76NO8P	M+H
						LMGP02010569	3	1-(9Z-heptadecenoyl)-2-heptadecanoyl-glycero-3-phosphoethanolamine	C39H76NO8P	M+H
						LMGP02010770	3	1-nonadecanoyl-2-(9Z-pentadecenoyl)-glycero-3-phosphoethanolamine	C39H76NO8P	M+H
						LMGP02010797	3	1-(9Z-nonadecenoyl)-2-pentadecanoyl-glycero-3-phosphoethanolamine	C39H76NO8P	M+H
						LMGP02010824	3	1-eicosanoyl-2-(9Z-tetradecenoyl)-glycero-3-phosphoethanolamine	C39H76NO8P	M+H
						LMGP02010843	3	1-(11Z-eicosenoyl)-2-tetradecanoyl-glycero-3-phosphoethanolamine	C39H76NO8P	M+H
						LMGP02011040	3	1-(11Z-docosenoyl)-2-dodecanoyl-glycero-3-phosphoethanolamine	C39H76NO8P	M+H
						LMGP02011204	3	1-octadecanoyl-2-(9Z-hexadecenoyl)-glycero-3-phosphoethanolamine	C39H76NO8P	M+H
744.532	45.5	4	0	C20:1	-0.360943	No annotations available.
759.409	77.9	4	0	C20:0	-0.533507	Expand group to view annotations.
				C20:2	-0.403415
				C20:1	-0.44771
759.409	77.9	4	0	C20:0	-0.533507	HMDB34327	3	Glucoconvallasaponin B	C38H62O15	M+H
766.941	351.2	4	0.007	C20:2	0.322476	No annotations available.
771.734	495.3	4	0	C20:1	-0.308974	No annotations available.
779.369	472.7	4	0	C20:1	-0.30762	No annotations available.
				C20:0	-0.372907
782.196	483.6	4	0.058	C20:0	0.320727	No annotations available.
				C20:2	0.348823
787.53	512.1	4	0.072	C20:0	0.324913	No annotations available.
				C20:2	0.322225
				C20:1	0.327063
846.092	569.8	4	0	C20:2	-0.303208	No annotations available.
854.208	569.5	4	0.007	C20:2	0.318918	No annotations available.
855.109	561	4	0	C20:2	-0.307273	No annotations available.
864.521	539.5	4	0.075	C20:0	0.344184	No annotations available.
				C20:1	0.335767
				C20:2	0.318564
867.54	537.5	4	0.007	C20:2	0.312079	Expand group to view annotations.
						LMGP06030093	3	1-(1Z-hexadecenyl)-2-(4Z7Z10Z13Z16Z19Z-docosahexaenoyl)-glycero-3-phospho-(1-myo-inositol)	C47H79O12P	M+H
878.402	518.5	4	0	C20:1	-0.351854	No annotations available.
				C20:0	-0.471227
913.635	370.5	4	0	C20:2	-0.308848	No annotations available.
934.501	90	4	0	C20:1	-0.318909	No annotations available.
949.56	507.2	4	0.007	C20:2	0.317633	No annotations available.
1006.52	594.1	4	0.007	C20:2	0.321564	No annotations available.
1012.27	42.1	4	0	C20:2	-0.321251	No annotations available.
1070.2	502.5	4	0	C20:2	-0.302363	No annotations available.
1179.82	473.1	4	0.008	C20:2	0.346376	No annotations available.
1188.3	472.9	4	0.025	C18OH	0.318754	No annotations available.
				C20:1	0.321471
				C20:2	0.351677
1195.94	30.1	4	0.007	C20:2	0.319553	No annotations available.
1241.67	578.3	4	0	C20:0	-0.332891	No annotations available.
				C20:1	-0.303685
1266.65	480.4	4	0	C20:2	-0.40801	No annotations available.
1271.64	502.5	4	0.022	C20:2	0.334372	No annotations available.
				C20:1	0.323863
1301.69	481.9	4	0	C20:1	-0.321341	No annotations available.
				C20:0	-0.394911
1306.35	273.7	4	0.022	C20:1	0.317529	No annotations available.
				C20:2	0.356815
1316.53	31.6	4	0.014	C20:1	0.330302	No annotations available.
1340.5	31.3	4	0	C20:2	-0.3101	No annotations available.
1370.75	478.9	4	0	C20:1	-0.331201	No annotations available.
1371.07	281.3	4	0.007	C20:2	0.306728	No annotations available.
1410.41	273.2	4	0	C20:2	-0.304015	No annotations available.
1426.69	271.5	4	0.007	C20:2	0.322334	No annotations available.
1454.61	29.7	4	0	C20:2	-0.338659	No annotations available.
1477.65	35	4	0.007	C20:2	0.31814	No annotations available.
1556.35	277.1	4	0	C20:1	-0.377224	No annotations available.
				C20:0	-0.33395
1592.36	267.6	4	0	C20:1	-0.312031	No annotations available.
114.055	84	4	0	C20:2	-0.324796	Expand group to view annotations.
						HMDB01301	3	1-Pyrroline-5-carboxylic acid	C5H7NO2	M+H
						HMDB06875	3	1-Pyrroline-2-carboxylic acid	C5H7NO2	M+H
149.993	53.6	4	0	C20:1	-0.316206	No annotations available.
213.983	572.4	4	0	C20:1	-0.336998	Expand group to view annotations.
				C20:2	-0.351447
213.983	572.4	4	0	C20:1	-0.336998	HMDB15373	3	Chloroxine	C9H5Cl2NO	M+H
243.134	229.4	4	0.022	C20:2	0.346049	No annotations available.
				C20:1	0.331995
292.956	70	4	0.076	C20:1	0.394033	No annotations available.
				C20:2	0.331344
				C20:0	0.332973
300.142	105.2	4	0.014	C20:1	0.313717	Expand group to view annotations.
300.142	105.2	4	0.014	C20:1	0.313717	HMDB29368	3	Saxitoxin	C10H17N7O4	M+H
339.268	452.1	4	0	C20:1	-0.336281	No annotations available.
362.223	52.8	4	0.064	C20:1	0.376593	No annotations available.
				C20:0	0.308652
373.274	144.1	4	0	C20:0	-0.33402	Expand group to view annotations.
				C20:1	-0.368458
				C20:2	-0.387523
						HMDB13627	3	Cervonoyl ethanolamide	C24H36O3	M+H
						HMDB14629	3	Nabilone	C24H36O3	M+H
						HMDB41301	3	(3R 6Z)-34-Dihydro-8-hydroxy-3-(6-pentadecenyl)-1H-2-benzopyran-1-one	C24H36O3	M+H
						LMST03020021	3	(5Z7E)-(3S)-3-hydroxy-910-seco-5710(19)-cholatrien-24-oic acid	C24H36O3	M+H
						LMST04010233	3	3-oxochol-4-en-24-oic acid	C24H36O3	M+H
						LMST04010275	3	3-Oxo-5beta-chol-1-en-24-oic Acid	C24H36O3	M+H
						LMST04010287	3	(22E)-3beta-Hydroxy-5alpha-chola-722-dien-24-oic Acid	C24H36O3	M+H
						LMST04010293	3	3-Oxo-5beta-chol-9(11)-en-24-oic Acid	C24H36O3	M+H
						LMST04010296	3	3-Oxo-5beta-chol-14-en-24-oic Acid	C24H36O3	M+H
						LMST04010297	3	3-Oxo-5beta-chol-7-en-24-oic Acid	C24H36O3	M+H
						LMST04010299	3	3alpha-Hydroxy-5beta-chola-814-dien-24-oic Acid	C24H36O3	M+H
						LMST04010320	3	(20S22E)-3beta-Hydroxychola-522-dien-24-oic Acid	C24H36O3	M+H
						LMST04010321	3	(22E)-3beta-Hydroxychola-522-dien-24-oic Acid	C24H36O3	M+H
						LMST04010329	3	3alpha-Hydroxy-5beta-chola-8(14)11-dien-24-oic Acid	C24H36O3	M+H
						LMST04010330	3	3alpha-Hydroxy-5beta-chola-79(11)-dien-24-oic Acid	C24H36O3	M+H
						LMST04010340	3	(22E)-3beta-Hydroxy-5alpha-chola-1622-dien-24-oic Acid	C24H36O3	M+H
						LMST04010376	3	3-Oxo-5beta-chol-8-en-24-oic Acid	C24H36O3	M+H
						LMST04010377	3	3-Oxo-5beta-chol-8(14)-en-24-oic Acid	C24H36O3	M+H
						LMST04010379	3	3-Oxo-5beta-chol-6-en-24-oic Acid	C24H36O3	M+H
						LMST04010408	3	3-Oxo-5beta14beta-chol-8-en-24-oic Acid	C24H36O3	M+H
						LMST04010433	3	3beta-Hydroxychola-57-dien-24-oic Acid	C24H36O3	M+H
						LMST04010436	3	3beta-Hydroxychola-516-dien-24-oic Acid	C24H36O3	M+H
						LMST04010437	3	(20S)-3beta-Hydroxychola-516-dien-24-oic Acid	C24H36O3	M+H
390.255	61.3	4	0.026	C20:1	0.338252	No annotations available.
				C18OH	0.322673
				C20:2	0.370039
420.159	98.3	4	0.068	C20:0	0.335063	No annotations available.
				C20:1	0.371034
423.253	578.5	4	0	C20:1	-0.355382	Expand group to view annotations.
				C20:2	-0.385627
				C18OH	-0.322587
						LMGP10050002	3	1-(9Z-heptadecenoyl)-sn-glycero-3-phosphate	C20H39O7P	M+H
442.971	9.5	4	0	C20:1	-0.3135	No annotations available.
				C20:0	-0.309058
494.243	62.6	4	0	C20:1	-0.339467	Expand group to view annotations.
				C20:0	-0.394931
						HMDB60123	3	rac-56-Epoxy-retinoyl-beta-D-glucuronide	C26H36O9	M+H_[+1]
540.316	407.1	4	0	C20:2	-0.338467	No annotations available.
551.313	409.8	4	0	C20:2	-0.3238	No annotations available.
591.306	413.8	4	0	C18OH	-0.331706	No annotations available.
				C20:1	-0.368696
				C20:2	-0.390395
609.381	44.3	4	0.074	C20:0	0.384603	Expand group to view annotations.
				C20:1	0.32236
						HMDB29779	3	2-O-Protocatechuoylalphitolic acid	C37H52O7	M+H
						HMDB35262	3	Avenestergenin A2	C37H52O7	M+H
656.35	51.5	4	0	C20:1	-0.321841	No annotations available.
				C20:0	-0.306648
665.245	442.3	4	0.022	C20:2	0.335396	Expand group to view annotations.
				C20:1	0.336682
						LMPK12140228	3	Flavaprenin 74-diglucoside	C32H40O15	M+H
						LMPK12140614	3	-	C32H40O15	M+H
824.52	76.1	4	0	C20:1	-0.304747	No annotations available.
				C20:0	-0.3104
839.325	317.8	4	0	C20:1	-0.318423	No annotations available.
				C20:0	-0.333315
